# Supplementary material
Source: Research Square preprint supplement (doi:10.21203/rs.3.rs-9402213/v1)
Supplement: Supplementary file 1 [file 6e918810302234611aaedb38.docx]

Supplementary Note

**Analytical strategy for decomposing of tumor-associated aging into acceleration and deviation components**

We compared biological age with chronological age in participants diagnosed with cancer before blood sampling and in age-matched healthy controls (Extended Data Fig. 5a). After adjusting for chronological age and sex using a linear regression model, we defined age acceleration (ΔAA) as the residual term. Specifically, biological age (BA) was regressed on chronological age (CA) and sex:

,

the residuals from this model were defined as ΔAA, representing deviation from the expected biological age given chronological age and sex. Cancer patients exhibited significantly elevated ΔAA relative to healthy individuals (Extended DataFig. 5b, Cancer *N* = 3,289, Health *N* = 5,036, Wilcoxon test *P* = 1.5×10-6), with the most prominent acceleration observed in younger individuals. These results suggest that cancer is associated with accelerated aging signatures.

To distinguish aging-related variation from tumor-associated perturbation, we constructed a reference trajectory of natural aging using data from healthy individuals. Specifically, we defined a natural aging axis in Principal Component Analysis (PCA) space by connecting the centroids of age-stratified healthy individuals (Extended Data Fig. 5c–d). We then projected cancer patients into this reference space (Extended DataFig. 5e). For each cancer patient, the displacement from the age-matched healthy centroid was decomposed into two orthogonal components as illustrated in Extended DataFig. 5f. From a mathematical perspective, the tumor acceleration component (TA) aligns with the natural aging axis, and the tumor deviation component (TD) is orthogonal to TA. TA exhibited a strong correlation with ΔAA among cancer patients (Extended DataFig. 5g, *N* = 3,289, Pearson correlation coefficient *r* = 0.822, *P* < 2.2×10-16; Extended DataFig. 5h,Cancer *N* = 3,289, Health *N* = 5,036, Wilcoxon test *P* = 3.4×10-5), supporting the interpretation that TA captures key aspects of systemic variation associated with aging. By contrast, TD was largely independent of BA (Extended Data Fig. 5i), indicating that it represents a tumor-related axis less related to aging.

**Analytical strategy for identifying candidate perturbation-sensitive molecules in cancer patients**

To evaluate the association between ΔAA and cancer types, we performed linear regression using ‘lm’ function in ‘stats’ (V.4.2.2) R package. In Extended Data Fig. 6a, the forest plot demonstrated the heterogeneity of ΔAA signals across different cancer types defined by ICD-10 blocks. C81–C96 (malignant neoplasms, stated or presumed to be primary, of lymphoid, haematopoietic and related tissue) displayed the largest number of significantly associated cancer types (Extended DataFig. 6b). To identify candidate perturbation-sensitive molecules, we applied DNB analysis to participants diagnosed with C81–C96. By intersecting latent features associated with TA (red dots in Extended DataFig. 6c) and DNB peaks, we identified 17 overlapping latent features and 159 corresponding proteins. Using the same strategy for TD (blue dots in Extended DataFig. 6c) and DNB peaks, we identified 84 overlapping latent features involving 198 proteins.

To further identify a refined set of genetically anchored candidate molecules, we integrated protein quantitative trait loci (pQTLs) with aging-related and cancer-related genome-wide association study (GWAS) data via mediation analyses (Supplementary Table 6). As illustrated in the flowchart of Extended DataFig. 6d, following mediation analysis on proteins associated with overlapping latent features between TA and DNB, we performed in silico perturbation via VAM to prioritize nine perturbation-sensitive candidate molecules associated with tumor-accelerated aging, including ANGPT21, DHRS4L22, ACRBP3, SHISA54, EFNA15, ATRAID6, CD487, TXNDC98, and DAG19. Similarly, for overlapping latent features between TD and DNB (Extended DataFig. 6e), in silico perturbation via VAM, conducted after mediation analysis identified perturbation-sensitive candidate plasma molecules in cancer patients. These molecules comprise PSME210, MAN1A211, and TXNDC912 in AML patients, as well as BTN3A213, PSME214, RNASET215, and CD4816 in DLBCL patients. Perturbation of the overlapping proteins between TD and DNB peaks primarily shifted samples along the axis orthogonal to the aging trajectory, suggesting that they are more consistent with tumor-specific processes than with modulation of the aging-aligned trajectory.

**References**

1 Van Hulle, C. *et al.* Elevated CSF angiopoietin-2 correlates with blood-brain barrier leakiness and markers of neuronal injury in early Alzheimer's disease. *Transl Psychiatry* **14**, 3 (2024).

2 Velez, J. I. *et al.* Familial Alzheimer's Disease and Recessive Modifiers. *Mol Neurobiol* **57**, 1035-1043 (2020).

3 Liu, Q. *et al.* Global characterization of mouse testis O-glycoproteome landscape during spermatogenesis. *Nat Commun* **16**, 2676 (2025).

4 Ma, L. Z. *et al.* Plasma proteomics identify novel biomarkers and dynamic patterns of biological aging. *J Adv Res* **80**, 691-704 (2026).

5 Ding, Y. *et al.* Comprehensive human proteome profiles across a 50-year lifespan reveal aging trajectories and signatures. *Cell* **188**, 5763-5784 e5726 (2025).

6 Surface, L. E. *et al.* ATRAID regulates the action of nitrogen-containing bisphosphonates on bone. *Sci Transl Med* **12** eaav9166 (2020).

7 McArdel, S. L., Terhorst, C. & Sharpe, A. H. Roles of CD48 in regulating immunity and tolerance. *Clin Immunol* **164**, 10-20 (2016).

8 Zheng, T. *et al.* Knockdown of TXNDC9 induces apoptosis and autophagy in glioma and mediates cell differentiation by p53 activation. *Aging (Albany NY)* **12**, 18649 (2020).

9 Cohn, R. D. *et al.* Disruption of DAG1 in differentiated skeletal muscle reveals a role for dystroglycan in muscle regeneration. *Cell* **110**, 639-648 (2002).

10 Qiu, C. *et al.* Construction and validation of a hypoxia-related gene signature to predict the prognosis of breast cancer. *BMC Cancer* **24** (2024).

11 Kong, Y. *et al.* Linear and non-linear proteome-wide association studies provide novel insight into venous thromboembolism. *Nat Commun* **16**, 6517 (2025).

12 Qun-Cao, Y., Nan, H., Rui-Hua, L. & Yuan-Yuan, D. High level of TXNDC9 predicts poor prognosis and contributes to the NF-κB-regulated metastatic potential in gastric cancer. *Neoplasma* **69**, 103-112 (2022).

13 Went, M. *et al.* Proteome-wide Mendelian randomization identifies protein associations and therapeutic targets for B-cell malignancy. *Blood Neoplasia* **3**, 100191 (2026).

14 Li, R. *et al.* PSME2 offers value as a biomarker of M1 macrophage infiltration in pan-cancer and inhibits osteosarcoma malignant phenotypes. *Int J Biol Sci* **20**, 1452 (2024).

15 Patel, S. *et al.* RNASET2—an autoantigen in anaplastic large cell lymphoma identified by protein array analysis. *J Proteomics* **75**, 5279-5292 (2012).

16 Zhang, W. *et al.* Molecular Mechanistic Insights and Real-World Clinical Outcomes of Selinexor in Diffuse Large B-Cell Lymphoma. *Blood* **144**, 6184 (2024).
