# Supplementary material
Source: Research Square preprint supplement (doi:10.21203/rs.3.rs-9402213/v1)
Supplement: Supplementary file 1 [file 134cf47e9c7a59c95eac9077.xlsx]

## Sheet: proteins to aging
id.exposure	id.outcome	outcome	exposure	method	nsnp	b	se	pval
ACHE	aging2	aging2	pqtl	Wald ratio	1	-0.00898832	0.00331783	0.0067467
ACRBP	aging2	aging2	pqtl	Wald ratio	1	-0.0303498	0.00713251	2.0892e-05
ACY3	aging2	aging2	pqtl	Wald ratio	1	0.0144902	0.00419866	0.00055819
ADAM15	aging2	aging2	pqtl	Wald ratio	1	0.00479248	0.00130784	0.000247882
ADAMTS1	aging2	aging2	pqtl	Wald ratio	1	0.0474734	0.0241263	0.0491024
ADAMTS8	aging2	aging2	pqtl	Wald ratio	1	0.0066305	0.00241941	0.00613386
AFAP1	aging2	aging2	pqtl	Wald ratio	1	0.00247716	0.00102815	0.0159815
AGER	aging2	aging2	pqtl	Wald ratio	1	0.0291953	0.00739513	7.88389e-05
AIF1	aging2	aging2	pqtl	Wald ratio	1	0.0307436	0.0100471	0.0022137
ANGPT2	aging2	aging2	pqtl	Wald ratio	1	-0.0179063	0.00716893	0.0124981
ANXA5	aging2	aging2	pqtl	Wald ratio	1	-0.0245858	0.00991388	0.0131405
APEX1	aging2	aging2	pqtl	Wald ratio	1	0.0059143	0.00259142	0.0224737
APOA1	aging2	aging2	pqtl	Wald ratio	1	-0.0471536	0.0159894	0.00318757
APOBR	aging2	aging2	pqtl	Wald ratio	1	0.00223212	0.000954131	0.0193135
APOH	aging2	aging2	pqtl	Wald ratio	1	0.00582653	0.00177642	0.00103837
ARG1	aging2	aging2	pqtl	Wald ratio	1	0.0124182	0.00573239	0.0302869
ARHGEF10	aging2	aging2	pqtl	Wald ratio	1	0.00887501	0.00390308	0.0229752
ASGR1	aging2	aging2	pqtl	Wald ratio	1	-0.0146437	0.00701309	0.0367929
ATP6V1G2	aging2	aging2	pqtl	Wald ratio	1	0.0223574	0.00650685	0.000590429
ATRAID	aging2	aging2	pqtl	Wald ratio	1	0.0109159	0.00403316	0.00679908
AXL	aging2	aging2	pqtl	Wald ratio	1	0.019085	0.00625841	0.00229223
B4GAT1	aging2	aging2	pqtl	Wald ratio	1	0.00863128	0.00394158	0.0285385
BCAM	aging2	aging2	pqtl	Wald ratio	1	-0.0161474	0.00497003	0.00115828
BLMH	aging2	aging2	pqtl	Wald ratio	1	0.00412031	0.00185249	0.0261348
BTN1A1	aging2	aging2	pqtl	Wald ratio	1	0.0126785	0.0051945	0.0146565
BTN2A1	aging2	aging2	pqtl	Wald ratio	1	-0.0131062	0.00446591	0.00333836
C1QTNF1	aging2	aging2	pqtl	Wald ratio	1	0.0102241	0.00431019	0.0176887
C1QTNF5	aging2	aging2	pqtl	Wald ratio	1	0.0187249	0.00901408	0.0377742
CA12	aging2	aging2	pqtl	Wald ratio	1	-0.00868328	0.00403409	0.0313599
CA4	aging2	aging2	pqtl	Wald ratio	1	-0.00638057	0.00300488	0.0337202
CALCOCO2	aging2	aging2	pqtl	Wald ratio	1	-0.0447711	0.0181229	0.0134957
CCL19	aging2	aging2	pqtl	Wald ratio	1	0.0324963	0.0139379	0.019727
CCL25	aging2	aging2	pqtl	Wald ratio	1	-0.0043058	0.00155513	0.00562677
CCS	aging2	aging2	pqtl	Wald ratio	1	-0.0047617	0.00217279	0.0284151
CD2AP	aging2	aging2	pqtl	Wald ratio	1	-0.00962445	0.0038666	0.0128059
CD300LF	aging2	aging2	pqtl	Wald ratio	1	0.00263133	0.00105939	0.0129981
CD34	aging2	aging2	pqtl	Wald ratio	1	-0.03626	0.0139015	0.00909788
CD46	aging2	aging2	pqtl	Wald ratio	1	-0.0413522	0.0131826	0.0017075
CD48	aging2	aging2	pqtl	Wald ratio	1	0.00385144	0.00175994	0.0286411
CD83	aging2	aging2	pqtl	Wald ratio	1	0.0138475	0.00606745	0.0224737
CDC27	aging2	aging2	pqtl	Wald ratio	1	-0.0306599	0.0138463	0.0268075
CDH6	aging2	aging2	pqtl	Wald ratio	1	-0.00521006	0.00202063	0.00992483
CELSR2	aging2	aging2	pqtl	Wald ratio	1	0.0147923	0.00279579	1.21695e-07
CEP170	aging2	aging2	pqtl	Wald ratio	1	-0.0546638	0.0164161	0.000868793
CEP20	aging2	aging2	pqtl	Wald ratio	1	-0.0269279	0.0113249	0.017418
CFB	aging2	aging2	pqtl	Wald ratio	1	0.0137862	0.00291507	2.25303e-06
CIAPIN1	aging2	aging2	pqtl	Wald ratio	1	0.0602823	0.0215649	0.0051838
CLEC11A	aging2	aging2	pqtl	Wald ratio	1	0.00879521	0.00351767	0.0124091
CLEC3B	aging2	aging2	pqtl	Wald ratio	1	0.0110276	0.00501529	0.027893
CLEC4C	aging2	aging2	pqtl	Wald ratio	1	0.00286979	0.00121123	0.0178204
CNDP1	aging2	aging2	pqtl	Wald ratio	1	0.00790127	0.00369014	0.0322592
COMMD1	aging2	aging2	pqtl	Wald ratio	1	0.0191707	0.00523035	0.00024707
CRELD2	aging2	aging2	pqtl	Wald ratio	1	0.0133033	0.00367251	0.000291892
CSF1	aging2	aging2	pqtl	Wald ratio	1	-0.0125504	0.00573022	0.0285095
CSF3	aging2	aging2	pqtl	Wald ratio	1	-0.0379565	0.0133194	0.00437574
CTSB	aging2	aging2	pqtl	Wald ratio	1	-0.00429234	0.00195951	0.0284866
DAG1	aging2	aging2	pqtl	Wald ratio	1	0.0826683	0.0167782	8.3449e-07
DBN1	aging2	aging2	pqtl	Wald ratio	1	0.0477177	0.0201308	0.0177698
DDAH1	aging2	aging2	pqtl	Wald ratio	1	-0.0221776	0.00669674	0.000927278
DDC	aging2	aging2	pqtl	Wald ratio	1	0.00582651	0.00289708	0.0443081
DDT	aging2	aging2	pqtl	Wald ratio	1	0.0109087	0.00544335	0.0450658
DHRS4L2	aging2	aging2	pqtl	Wald ratio	1	-0.00735458	0.00351503	0.0364097
DNAJA4	aging2	aging2	pqtl	Wald ratio	1	0.0316021	0.0083433	0.000152034
DNER	aging2	aging2	pqtl	Wald ratio	1	-0.0100034	0.00382197	0.00886209
DPT	aging2	aging2	pqtl	Wald ratio	1	0.00709221	0.0031561	0.0246307
DPY30	aging2	aging2	pqtl	Wald ratio	1	0.0385903	0.017809	0.0302431
DRAXIN	aging2	aging2	pqtl	Wald ratio	1	-0.00774782	0.00381211	0.0421107
DUSP13	aging2	aging2	pqtl	Wald ratio	1	0.00776229	0.00386695	0.0447132
DUSP29	aging2	aging2	pqtl	Wald ratio	1	0.0206684	0.00799227	0.00970822
ECM1	aging2	aging2	pqtl	Wald ratio	1	-0.00392452	0.00155268	0.0114851
EFNA1	aging2	aging2	pqtl	Wald ratio	1	0.00917394	0.00327386	0.00507588
EGLN1	aging2	aging2	pqtl	Wald ratio	1	0.0203292	0.00812314	0.0123273
ENPP7	aging2	aging2	pqtl	Wald ratio	1	-0.00232806	0.00111626	0.0370162
ENTPD6	aging2	aging2	pqtl	Wald ratio	1	-0.00376311	0.00153186	0.0140276
ERN1	aging2	aging2	pqtl	Wald ratio	1	-0.0147573	0.00487944	0.00249131
F11	aging2	aging2	pqtl	Wald ratio	1	-0.00540691	0.00271823	0.0466873
FCER1A	aging2	aging2	pqtl	Wald ratio	1	0.0243342	0.00863632	0.00483756
FCGR2A	aging2	aging2	pqtl	Wald ratio	1	0.00361805	0.0010005	0.000298925
FES	aging2	aging2	pqtl	Wald ratio	1	0.0370463	0.00809032	4.67003e-06
FGF2	aging2	aging2	pqtl	Wald ratio	1	0.00455267	0.00154906	0.0032929
FGF5	aging2	aging2	pqtl	Wald ratio	1	-0.00643349	0.00172993	0.00020006
FN1	aging2	aging2	pqtl	Wald ratio	1	0.00531328	0.00265066	0.0450151
FNTA	aging2	aging2	pqtl	Wald ratio	1	-0.0530771	0.0217371	0.0146155
FUCA1	aging2	aging2	pqtl	Wald ratio	1	-0.00684754	0.00284105	0.0159434
GALNT2	aging2	aging2	pqtl	Wald ratio	1	0.00854386	0.0035952	0.0174794
GASK1A	aging2	aging2	pqtl	Wald ratio	1	0.00285897	0.00142553	0.044904
GFRA1	aging2	aging2	pqtl	Wald ratio	1	-0.0111775	0.00487246	0.0217891
GIMAP7	aging2	aging2	pqtl	Wald ratio	1	-0.00411342	0.00203231	0.0429687
GLRX5	aging2	aging2	pqtl	Wald ratio	1	0.0272574	0.00902249	0.00251899
GMPR	aging2	aging2	pqtl	Wald ratio	1	-0.0133245	0.00408782	0.00111587
GOLGA3	aging2	aging2	pqtl	Wald ratio	1	-0.0220394	0.0100475	0.0282703
GPA33	aging2	aging2	pqtl	Wald ratio	1	0.0118265	0.0054216	0.0291567
GPNMB	aging2	aging2	pqtl	Wald ratio	1	0.007263	0.00278816	0.00918885
GRPEL1	aging2	aging2	pqtl	Wald ratio	1	-0.0383507	0.0195459	0.0497532
HBZ	aging2	aging2	pqtl	Wald ratio	1	0.00285456	0.00106228	0.00720546
HDGFL2	aging2	aging2	pqtl	Wald ratio	1	-0.0578588	0.0210944	0.00609094
HLA-DRA	aging2	aging2	pqtl	Wald ratio	1	-0.0161404	0.0019156	3.5844e-17
HLA-E	aging2	aging2	pqtl	Wald ratio	1	0.0181176	0.00437197	3.4124e-05
HSDL2	aging2	aging2	pqtl	Wald ratio	1	-0.00416129	0.00174185	0.0168944
HYAL1	aging2	aging2	pqtl	Wald ratio	1	-0.0081071	0.00411546	0.0488484
HYOU1	aging2	aging2	pqtl	Wald ratio	1	-0.0156837	0.00612313	0.0104256
ICAM5	aging2	aging2	pqtl	Wald ratio	1	0.00423097	0.00155988	0.00668057
IFNAR1	aging2	aging2	pqtl	Wald ratio	1	-0.00632151	0.0025481	0.0131062
IFNGR2	aging2	aging2	pqtl	Wald ratio	1	-0.00293529	0.00102676	0.00425261
IL1R1	aging2	aging2	pqtl	Wald ratio	1	-0.0131354	0.00605399	0.0300293
IL6R	aging2	aging2	pqtl	Wald ratio	1	0.00298458	0.000972117	0.00213922
IQGAP2	aging2	aging2	pqtl	Wald ratio	1	0.0164615	0.00759449	0.0301923
ISLR2	aging2	aging2	pqtl	Wald ratio	1	-0.0116477	0.00531488	0.028413
ITGA11	aging2	aging2	pqtl	Wald ratio	1	-0.0107482	0.00540345	0.0466868
ITGA2	aging2	aging2	pqtl	Wald ratio	1	0.0036189	0.00180789	0.0453146
JAM3	aging2	aging2	pqtl	Wald ratio	1	-0.0277872	0.0105054	0.00816817
KIAA0319	aging2	aging2	pqtl	Wald ratio	1	0.00743217	0.00355785	0.0367122
KLK1	aging2	aging2	pqtl	Wald ratio	1	-0.00562044	0.00117627	1.76872e-06
LATS1	aging2	aging2	pqtl	Wald ratio	1	-0.0357785	0.017376	0.0394866
LECT2	aging2	aging2	pqtl	Wald ratio	1	-0.00274624	0.00133965	0.0403678
LPA	aging2	aging2	pqtl	Wald ratio	1	-0.0181477	0.00195474	1.6329e-20
LTA	aging2	aging2	pqtl	Wald ratio	1	0.00349893	0.00139581	0.0121852
LTBP2	aging2	aging2	pqtl	Wald ratio	1	0.023933	0.0100194	0.0169096
LXN	aging2	aging2	pqtl	Wald ratio	1	0.019262	0.00612501	0.00166199
LY6D	aging2	aging2	pqtl	Wald ratio	1	-0.00483621	0.00237606	0.0418117
MAMDC2	aging2	aging2	pqtl	Wald ratio	1	-0.011435	0.00539208	0.0339469
MBL2	aging2	aging2	pqtl	Wald ratio	1	0.00230019	0.00117058	0.0494144
MDGA1	aging2	aging2	pqtl	Wald ratio	1	0.0020346	0.000937828	0.0300461
MDH1	aging2	aging2	pqtl	Wald ratio	1	-0.0346517	0.0121413	0.00431676
METAP2	aging2	aging2	pqtl	Wald ratio	1	-0.0742869	0.0197163	0.000164701
MMP10	aging2	aging2	pqtl	Wald ratio	1	0.00801676	0.00372043	0.0311779
MPHOSPH8	aging2	aging2	pqtl	Wald ratio	1	-0.0402844	0.0169764	0.0176462
MSMB	aging2	aging2	pqtl	Wald ratio	1	0.00303906	0.00111319	0.00633237
MST1	aging2	aging2	pqtl	Wald ratio	1	0.0052681	0.00104066	4.14302e-07
MUC2	aging2	aging2	pqtl	Wald ratio	1	-0.0111222	0.00448835	0.0132116
NMI	aging2	aging2	pqtl	Wald ratio	1	0.00468657	0.00227617	0.0394968
NOS1	aging2	aging2	pqtl	Wald ratio	1	-0.0207804	0.00927069	0.0249926
NOTCH2	aging2	aging2	pqtl	Wald ratio	1	0.0449637	0.0115875	0.00010431
NPPB	aging2	aging2	pqtl	Wald ratio	1	0.0126687	0.00574955	0.0275644
NTproBNP	aging2	aging2	pqtl	Wald ratio	1	0.00908515	0.00412319	0.0275644
NUMB	aging2	aging2	pqtl	Wald ratio	1	-0.0291209	0.011894	0.0143503
OGN	aging2	aging2	pqtl	Wald ratio	1	0.00497627	0.00183873	0.00680235
PCBP2	aging2	aging2	pqtl	Wald ratio	1	0.0500837	0.0211927	0.0181155
PCSK9	aging2	aging2	pqtl	Wald ratio	1	-0.0137233	0.00322756	2.11948e-05
PDCD6	aging2	aging2	pqtl	Wald ratio	1	0.00310615	0.00109598	0.0045949
PDZD2	aging2	aging2	pqtl	Wald ratio	1	0.0102866	0.00443865	0.0204765
PDZK1	aging2	aging2	pqtl	Wald ratio	1	-0.0199054	0.0088572	0.0246161
PEPD	aging2	aging2	pqtl	Wald ratio	1	-0.00681017	0.00304664	0.0253973
PGLYRP1	aging2	aging2	pqtl	Wald ratio	1	-0.00839708	0.00400133	0.0358546
PNLIPRP2	aging2	aging2	pqtl	Wald ratio	1	-0.002751	0.000896957	0.00216195
PROCR	aging2	aging2	pqtl	Wald ratio	1	0.0078496	0.00250034	0.00169286
PROK1	aging2	aging2	pqtl	Wald ratio	1	-0.00633344	0.00285456	0.0265067
PRSS53	aging2	aging2	pqtl	Wald ratio	1	0.00260319	0.00122778	0.0339855
RABGAP1L	aging2	aging2	pqtl	Wald ratio	1	0.0410821	0.016235	0.0113913
RARRES1	aging2	aging2	pqtl	Wald ratio	1	-0.00609576	0.00227615	0.00740412
REG1A	aging2	aging2	pqtl	Wald ratio	1	-0.00916165	0.00425845	0.0314444
REG1B	aging2	aging2	pqtl	Wald ratio	1	-0.00661374	0.00307415	0.0314444
RNASE6	aging2	aging2	pqtl	Wald ratio	1	-0.00821654	0.00275931	0.00290374
ROBO2	aging2	aging2	pqtl	Wald ratio	1	-0.0223078	0.0102183	0.0290276
SCAMP3	aging2	aging2	pqtl	Wald ratio	1	0.0448053	0.0142673	0.001687
SCLY	aging2	aging2	pqtl	Wald ratio	1	0.0150181	0.0057808	0.00937892
SDHB	aging2	aging2	pqtl	Wald ratio	1	-0.0353482	0.0169354	0.036867
SERPINB1	aging2	aging2	pqtl	Wald ratio	1	0.0352563	0.0117776	0.00275796
SERPINE2	aging2	aging2	pqtl	Wald ratio	1	0.00454595	0.00192714	0.0183288
SERPINI2	aging2	aging2	pqtl	Wald ratio	1	-0.00725511	0.00322684	0.0245531
SETMAR	aging2	aging2	pqtl	Wald ratio	1	-0.0094287	0.00465876	0.0429839
SH2B3	aging2	aging2	pqtl	Wald ratio	1	-0.0603693	0.0155203	0.000100365
SH3GLB2	aging2	aging2	pqtl	Wald ratio	1	-0.0102611	0.00383638	0.00748017
SHISA5	aging2	aging2	pqtl	Wald ratio	1	-0.0271371	0.00994277	0.0063463
SLITRK1	aging2	aging2	pqtl	Wald ratio	1	0.0179093	0.00851734	0.0354932
SNX9	aging2	aging2	pqtl	Wald ratio	1	-0.0283819	0.0129441	0.0283322
SORCS2	aging2	aging2	pqtl	Wald ratio	1	0.00551052	0.0024838	0.0265149
SPINK8	aging2	aging2	pqtl	Wald ratio	1	-0.00670023	0.00243075	0.00584324
SUGP1	aging2	aging2	pqtl	Wald ratio	1	0.00855106	0.00421699	0.0425843
TARBP2	aging2	aging2	pqtl	Wald ratio	1	0.0534226	0.0226056	0.0181155
TBCA	aging2	aging2	pqtl	Wald ratio	1	-0.016489	0.00760802	0.0302105
TCN2	aging2	aging2	pqtl	Wald ratio	1	0.00707113	0.00204218	0.000535115
TFPI	aging2	aging2	pqtl	Wald ratio	1	0.00746133	0.00317424	0.0187438
TNC	aging2	aging2	pqtl	Wald ratio	1	0.011486	0.00432041	0.00784772
TNFRSF6B	aging2	aging2	pqtl	Wald ratio	1	0.0161462	0.00367755	1.13109e-05
TNIP1	aging2	aging2	pqtl	Wald ratio	1	0.0611756	0.0251264	0.0149034
TOP2B	aging2	aging2	pqtl	Wald ratio	1	0.0321952	0.0135527	0.0175227
TOR1AIP1	aging2	aging2	pqtl	Wald ratio	1	-0.00418709	0.0014318	0.00345164
TPMT	aging2	aging2	pqtl	Wald ratio	1	-0.00582519	0.00270535	0.031302
TXNDC9	aging2	aging2	pqtl	Wald ratio	1	0.0449761	0.020417	0.0276039
TYRO3	aging2	aging2	pqtl	Wald ratio	1	-0.00439875	0.00169359	0.00939595
UROS	aging2	aging2	pqtl	Wald ratio	1	-0.034474	0.00910423	0.000152728
VWC2L	aging2	aging2	pqtl	Wald ratio	1	0.0245105	0.0111371	0.02775
WFDC2	aging2	aging2	pqtl	Wald ratio	1	-0.0313352	0.0142151	0.0274993
WFIKKN1	aging2	aging2	pqtl	Wald ratio	1	-0.0095172	0.00420852	0.0237338
YES1	aging2	aging2	pqtl	Wald ratio	1	0.0290805	0.0146339	0.0469005
ZBTB17	aging2	aging2	pqtl	Wald ratio	1	-0.0612522	0.0229494	0.00760751

## Sheet: proteins to AML
id.exposure	id.outcome	outcome	exposure	method	nsnp	b	se	pval
ADD1	aml	aml	pqtl	Wald ratio	1	-2.19444	1.06222	0.038838
ADGRD1	aml	aml	pqtl	Wald ratio	1	-1.3033	0.440369	0.00308082
C7	aml	aml	pqtl	Wald ratio	1	0.391466	0.18479	0.0341382
CA9	aml	aml	pqtl	Wald ratio	1	-3.7845	1.78604	0.0340965
CALCOCO1	aml	aml	pqtl	Wald ratio	1	-3.17895	1.22932	0.00971159
CCL14	aml	aml	pqtl	Wald ratio	1	-0.632197	0.278837	0.023374
CCL24	aml	aml	pqtl	Wald ratio	1	-0.46657	0.207429	0.0244936
CCL27	aml	aml	pqtl	Wald ratio	1	2.48013	0.781731	0.00151074
CCN2	aml	aml	pqtl	Wald ratio	1	1.09796	0.49621	0.026919
CD27	aml	aml	pqtl	Wald ratio	1	-1.37187	0.668403	0.0401242
CES3	aml	aml	pqtl	Wald ratio	1	-5.16087	1.72881	0.00283379
CFB	aml	aml	pqtl	Wald ratio	1	1.08328	0.488103	0.0264617
CFI	aml	aml	pqtl	Wald ratio	1	1.73668	0.750754	0.0207087
CHRDL1	aml	aml	pqtl	Wald ratio	1	-0.914626	0.412585	0.0266355
CKMT1A_CKMT1B	aml	aml	pqtl	Wald ratio	1	-2.98815	1.33889	0.0256274
CLC	aml	aml	pqtl	Wald ratio	1	-7.96157	3.58018	0.0261625
COL28A1	aml	aml	pqtl	Wald ratio	1	0.502755	0.193571	0.00939676
CREG1	aml	aml	pqtl	Wald ratio	1	2.34398	1.039	0.0240712
CSF1R	aml	aml	pqtl	Wald ratio	1	-2.85462	1.26332	0.0238454
CXCL14	aml	aml	pqtl	Wald ratio	1	5.97143	2.39841	0.0127836
DBH	aml	aml	pqtl	Wald ratio	1	-0.380981	0.171084	0.0259566
DDC	aml	aml	pqtl	Wald ratio	1	-1.23831	0.548309	0.0239198
DNMBP	aml	aml	pqtl	Wald ratio	1	3.57887	1.66808	0.031912
EDN1	aml	aml	pqtl	Wald ratio	1	1.47939	0.716412	0.0389233
EIF2AK3	aml	aml	pqtl	Wald ratio	1	2.59583	1.27	0.0409572
ELN	aml	aml	pqtl	Wald ratio	1	5.42353	2.44632	0.0266222
ENO3	aml	aml	pqtl	Wald ratio	1	-3.88936	1.62979	0.0170132
ENPEP	aml	aml	pqtl	Wald ratio	1	-4.92399	2.23832	0.0278168
ESAM	aml	aml	pqtl	Wald ratio	1	-4.72811	2.21234	0.0325857
FABP5	aml	aml	pqtl	Wald ratio	1	2.25167	1.02632	0.0282398
FCRL6	aml	aml	pqtl	Wald ratio	1	0.544624	0.242081	0.0244641
FES	aml	aml	pqtl	Wald ratio	1	2.76231	1.16692	0.0179246
FETUB	aml	aml	pqtl	Wald ratio	1	-1.30973	0.537959	0.0149072
FOXJ3	aml	aml	pqtl	Wald ratio	1	-4.54271	2.28646	0.0469459
GAS6	aml	aml	pqtl	Wald ratio	1	0.968168	0.472072	0.0402776
GOLM2	aml	aml	pqtl	Wald ratio	1	3.24334	1.26998	0.0106541
GZMH	aml	aml	pqtl	Wald ratio	1	-5.02868	1.64286	0.00220646
HLA-E	aml	aml	pqtl	Wald ratio	1	-1.44163	0.642326	0.0248074
HSPA1A	aml	aml	pqtl	Wald ratio	1	-8.25962	3.71346	0.0261324
HYOU1	aml	aml	pqtl	Wald ratio	1	1.97341	0.944509	0.0366761
ICAM4	aml	aml	pqtl	Wald ratio	1	-3.09273	1.39182	0.0262781
LGALS3BP	aml	aml	pqtl	Wald ratio	1	-4.23837	1.81449	0.0194993
MAMDC2	aml	aml	pqtl	Wald ratio	1	-1.67559	0.803756	0.0370969
MAN1A2	aml	aml	pqtl	Wald ratio	1	1.70051	0.811282	0.036075
MMP8	aml	aml	pqtl	Wald ratio	1	-0.96967	0.443121	0.0286498
NGRN	aml	aml	pqtl	Wald ratio	1	4.86306	2.39516	0.0423189
NID2	aml	aml	pqtl	Wald ratio	1	-0.51446	0.260976	0.0486901
OGFR	aml	aml	pqtl	Wald ratio	1	-6.92183	1.85954	0.000197394
PALM2	aml	aml	pqtl	Wald ratio	1	-1.59545	0.807727	0.048241
PCDH1	aml	aml	pqtl	Wald ratio	1	4.00128	1.91538	0.0367057
PCDH12	aml	aml	pqtl	Wald ratio	1	0.904	0.458462	0.0486311
PDCD5	aml	aml	pqtl	Wald ratio	1	-0.954521	0.466489	0.0407386
PLCB2	aml	aml	pqtl	Wald ratio	1	2.84408	1.2	0.0177849
PLTP	aml	aml	pqtl	Wald ratio	1	-0.848503	0.388224	0.0288446
PRG2	aml	aml	pqtl	Wald ratio	1	5.73067	1.94067	0.00314766
PSME1	aml	aml	pqtl	Wald ratio	1	3.201	1.618	0.0478872
PSME2	aml	aml	pqtl	Wald ratio	1	2.88378	1.45766	0.0478872
RAB2B	aml	aml	pqtl	Wald ratio	1	2.5713	1.05217	0.0145334
RBP1	aml	aml	pqtl	Wald ratio	1	-3.35785	1.56281	0.0316662
RBP2	aml	aml	pqtl	Wald ratio	1	5.72029	2.2942	0.0126538
RGMB	aml	aml	pqtl	Wald ratio	1	1.73099	0.873099	0.0474138
RTBDN	aml	aml	pqtl	Wald ratio	1	2.68235	0.932353	0.00401512
SERPINC1	aml	aml	pqtl	Wald ratio	1	-4.41505	2.04002	0.0304477
SMOC1	aml	aml	pqtl	Wald ratio	1	-1.62207	0.77067	0.0353132
ST8SIA1	aml	aml	pqtl	Wald ratio	1	-7.92048	3.5241	0.0246067
TDP1	aml	aml	pqtl	Wald ratio	1	4.57462	1.81742	0.0118328
TFF2	aml	aml	pqtl	Wald ratio	1	3.39667	1.31583	0.0098406
THBD	aml	aml	pqtl	Wald ratio	1	-1.68141	0.836181	0.0443448
TNFSF8	aml	aml	pqtl	Wald ratio	1	-1.36991	0.669469	0.0407302
TP53I3	aml	aml	pqtl	Wald ratio	1	0.632884	0.311298	0.042048
TPPP3	aml	aml	pqtl	Wald ratio	1	-3.9719	1.86033	0.0327568
TXNDC9	aml	aml	pqtl	Wald ratio	1	6.43	3.012	0.0327778
VTI1A	aml	aml	pqtl	Wald ratio	1	-9.80333	3.19889	0.00217957
ZBTB17	aml	aml	pqtl	Wald ratio	1	10.1682	3.39091	0.0027117

## Sheet: proteins to DLBCL
id.exposure	id.outcome	outcome	exposure	method	nsnp	b	se	pval
A1BG	dlbcl	dlbcl	pqtl	Wald ratio	1	0.0891172	0.469313	0.849396
AAMDC	dlbcl	dlbcl	pqtl	Wald ratio	1	-0.0220876	0.117707	0.851152
AARSD1	dlbcl	dlbcl	pqtl	Wald ratio	1	0.570769	0.795385	0.473003
ABHD14B	dlbcl	dlbcl	pqtl	Wald ratio	1	0.550942	0.336985	0.102067
ABL1	dlbcl	dlbcl	pqtl	Wald ratio	1	-1.13743	1.57544	0.47031
ABO	dlbcl	dlbcl	pqtl	Wald ratio	1	-0.187083	0.0846022	0.0270134
ACAA1	dlbcl	dlbcl	pqtl	Wald ratio	1	-2.12406	0.955639	0.0262388
ACADM	dlbcl	dlbcl	pqtl	Wald ratio	1	1.45887	0.79078	0.0650604
ACADSB	dlbcl	dlbcl	pqtl	Wald ratio	1	-0.468478	0.455707	0.303937
ACAN	dlbcl	dlbcl	pqtl	Wald ratio	1	-0.945038	1.0855	0.38397
ACE2	dlbcl	dlbcl	pqtl	Wald ratio	1	0.186986	0.573973	0.744594
ACHE	dlbcl	dlbcl	pqtl	Wald ratio	1	0.0562092	0.321895	0.861379
ACOX1	dlbcl	dlbcl	pqtl	Wald ratio	1	3.60519	1.48052	0.0148882
ACP1	dlbcl	dlbcl	pqtl	Wald ratio	1	0.506117	0.271543	0.0623415
ACP5	dlbcl	dlbcl	pqtl	Wald ratio	1	-0.0500998	0.278842	0.857411
ACP6	dlbcl	dlbcl	pqtl	Wald ratio	1	-0.0474877	0.108867	0.662692
ACRBP	dlbcl	dlbcl	pqtl	Wald ratio	1	0.214744	0.708974	0.761971
ACTA2	dlbcl	dlbcl	pqtl	Wald ratio	1	1.71923	1.89038	0.363107
ACVRL1	dlbcl	dlbcl	pqtl	Wald ratio	1	0.0255639	0.296617	0.931319
ACY1	dlbcl	dlbcl	pqtl	Wald ratio	1	-0.0815152	0.459758	0.859273
ACY3	dlbcl	dlbcl	pqtl	Wald ratio	1	-1.01477	0.432955	0.0190868
ACYP1	dlbcl	dlbcl	pqtl	Wald ratio	1	0.244346	0.394146	0.535298
ADA	dlbcl	dlbcl	pqtl	Wald ratio	1	-0.221938	0.181163	0.220547
ADA2	dlbcl	dlbcl	pqtl	Wald ratio	1	-0.533493	0.488995	0.275274
ADAM12	dlbcl	dlbcl	pqtl	Wald ratio	1	1.33162	0.876923	0.128884
ADAM15	dlbcl	dlbcl	pqtl	Wald ratio	1	0.225988	0.139921	0.106286
ADAM23	dlbcl	dlbcl	pqtl	Wald ratio	1	-0.192778	0.230556	0.403074
ADAM8	dlbcl	dlbcl	pqtl	Wald ratio	1	-0.159014	0.236761	0.501823
ADAM9	dlbcl	dlbcl	pqtl	Wald ratio	1	-1.28904	2.51244	0.607907
ADAMTS1	dlbcl	dlbcl	pqtl	Wald ratio	1	-2.21698	2.51698	0.378421
ADAMTS13	dlbcl	dlbcl	pqtl	Wald ratio	1	-0.50741	0.302787	0.093778
ADAMTS15	dlbcl	dlbcl	pqtl	Wald ratio	1	-0.185955	1.2736	0.883915
ADAMTS16	dlbcl	dlbcl	pqtl	Wald ratio	1	-0.6608	0.8376	0.430158
ADAMTS4	dlbcl	dlbcl	pqtl	Wald ratio	1	-1.38908	0.830252	0.0943122
ADAMTS8	dlbcl	dlbcl	pqtl	Wald ratio	1	0.537045	0.22753	0.0182592
ADAMTSL2	dlbcl	dlbcl	pqtl	Wald ratio	1	-1.65794	0.98785	0.0932817
ADAMTSL4	dlbcl	dlbcl	pqtl	Wald ratio	1	0.42227	0.530154	0.425738
ADAMTSL5	dlbcl	dlbcl	pqtl	Wald ratio	1	0.337656	0.253367	0.182638
ADD1	dlbcl	dlbcl	pqtl	Wald ratio	1	0.293333	0.705556	0.677594
ADGRB3	dlbcl	dlbcl	pqtl	Wald ratio	1	-0.0963974	0.110917	0.384795
ADGRD1	dlbcl	dlbcl	pqtl	Wald ratio	1	0.33153	0.281794	0.239396
ADGRE1	dlbcl	dlbcl	pqtl	Wald ratio	1	-0.211607	0.321652	0.510618
ADGRE2	dlbcl	dlbcl	pqtl	Wald ratio	1	0.350719	0.423381	0.407457
ADGRE5	dlbcl	dlbcl	pqtl	Wald ratio	1	0.0904971	0.453363	0.841783
ADGRG1	dlbcl	dlbcl	pqtl	Wald ratio	1	0.0973684	1.29342	0.939992
ADH1B	dlbcl	dlbcl	pqtl	Wald ratio	1	1.1026	6.69447	0.869177
ADH4	dlbcl	dlbcl	pqtl	Wald ratio	1	0.900763	0.761069	0.236591
ADIPOQ	dlbcl	dlbcl	pqtl	Wald ratio	1	0.384992	0.512887	0.452872
AFAP1	dlbcl	dlbcl	pqtl	Wald ratio	1	0.00609418	0.102678	0.952671
AFP	dlbcl	dlbcl	pqtl	Wald ratio	1	-0.115957	0.528723	0.826404
AGER	dlbcl	dlbcl	pqtl	Wald ratio	1	0.12625	0.86375	0.883791
AGR2	dlbcl	dlbcl	pqtl	Wald ratio	1	1.53564	0.974257	0.114975
AGRN	dlbcl	dlbcl	pqtl	Wald ratio	1	0.178022	0.280495	0.525642
AGRP	dlbcl	dlbcl	pqtl	Wald ratio	1	0.334928	0.33451	0.316705
AGT	dlbcl	dlbcl	pqtl	Wald ratio	1	-0.196484	0.186639	0.292455
AGXT	dlbcl	dlbcl	pqtl	Wald ratio	1	0.462989	0.37758	0.220123
AHCY	dlbcl	dlbcl	pqtl	Wald ratio	1	0.178766	0.380088	0.638122
AHNAK2	dlbcl	dlbcl	pqtl	Wald ratio	1	-0.591943	0.470616	0.208462
AHSG	dlbcl	dlbcl	pqtl	Wald ratio	1	0.0676647	0.150599	0.653212
AIF1	dlbcl	dlbcl	pqtl	Wald ratio	1	0.097	1.13	0.931593
AK1	dlbcl	dlbcl	pqtl	Wald ratio	1	2.64561	2.33158	0.256506
AK2	dlbcl	dlbcl	pqtl	Wald ratio	1	1.47503	3.93212	0.707568
AKR1B1	dlbcl	dlbcl	pqtl	Wald ratio	1	-1.02017	0.754167	0.176149
AKR7L	dlbcl	dlbcl	pqtl	Wald ratio	1	-0.81879	0.629618	0.193445
AKT3	dlbcl	dlbcl	pqtl	Wald ratio	1	3.36714	1.67429	0.0443157
ALCAM	dlbcl	dlbcl	pqtl	Wald ratio	1	-0.003125	0.923611	0.9973
ALDH1A1	dlbcl	dlbcl	pqtl	Wald ratio	1	-2.16517	1.3	0.0958102
ALDH3A1	dlbcl	dlbcl	pqtl	Wald ratio	1	0.296835	0.218987	0.175261
ALDH5A1	dlbcl	dlbcl	pqtl	Wald ratio	1	-0.0585034	0.67619	0.931054
ALPP	dlbcl	dlbcl	pqtl	Wald ratio	1	-0.0341463	0.222154	0.877842
AMN	dlbcl	dlbcl	pqtl	Wald ratio	1	-0.196144	0.138165	0.155714
AMOTL2	dlbcl	dlbcl	pqtl	Wald ratio	1	0.798113	1.89057	0.672911
AMPD3	dlbcl	dlbcl	pqtl	Wald ratio	1	0.109821	0.282149	0.697106
AMY1A_AMY1B_AMY1C	dlbcl	dlbcl	pqtl	Wald ratio	1	-0.179949	0.330591	0.586219
AMY2A	dlbcl	dlbcl	pqtl	Wald ratio	1	-0.126263	0.302189	0.676073
AMY2B	dlbcl	dlbcl	pqtl	Wald ratio	1	-0.114679	0.274465	0.676073
ANG	dlbcl	dlbcl	pqtl	Wald ratio	1	0.384049	0.272239	0.158332
ANGPT1	dlbcl	dlbcl	pqtl	Wald ratio	1	-0.373797	0.63262	0.554607
ANGPT2	dlbcl	dlbcl	pqtl	Wald ratio	1	0.286577	0.681208	0.673982
ANGPTL1	dlbcl	dlbcl	pqtl	Wald ratio	1	0.0397163	0.348936	0.90938
ANGPTL2	dlbcl	dlbcl	pqtl	Wald ratio	1	0.377049	2.14098	0.860207
ANGPTL4	dlbcl	dlbcl	pqtl	Wald ratio	1	0.226199	0.362731	0.53289
ANGPTL7	dlbcl	dlbcl	pqtl	Wald ratio	1	0.533302	0.614709	0.38563
ANKMY2	dlbcl	dlbcl	pqtl	Wald ratio	1	0.119048	1.2369	0.923325
ANPEP	dlbcl	dlbcl	pqtl	Wald ratio	1	0.402815	0.348348	0.247534
ANXA1	dlbcl	dlbcl	pqtl	Wald ratio	1	1.23492	2.25079	0.583239
ANXA10	dlbcl	dlbcl	pqtl	Wald ratio	1	2.01087	2.13913	0.347197
ANXA11	dlbcl	dlbcl	pqtl	Wald ratio	1	-1.97778	1.69841	0.244227
ANXA2	dlbcl	dlbcl	pqtl	Wald ratio	1	-0.189427	0.232159	0.414535
ANXA3	dlbcl	dlbcl	pqtl	Wald ratio	1	-0.949121	1.18858	0.42456
ANXA4	dlbcl	dlbcl	pqtl	Wald ratio	1	-1.07641	1.45144	0.458319
ANXA5	dlbcl	dlbcl	pqtl	Wald ratio	1	-0.730909	0.998182	0.464022
AOC1	dlbcl	dlbcl	pqtl	Wald ratio	1	0.292323	0.375197	0.43591
AOC3	dlbcl	dlbcl	pqtl	Wald ratio	1	-0.0961404	0.220936	0.663453
AP1G2	dlbcl	dlbcl	pqtl	Wald ratio	1	0.0636816	0.843284	0.939804
AP3B1	dlbcl	dlbcl	pqtl	Wald ratio	1	-1.28571	2.06607	0.533745
APBB1IP	dlbcl	dlbcl	pqtl	Wald ratio	1	-0.404167	0.488889	0.408405
APCS	dlbcl	dlbcl	pqtl	Wald ratio	1	-0.505709	0.512707	0.323961
APEX1	dlbcl	dlbcl	pqtl	Wald ratio	1	0.144133	0.250765	0.565446
APOA1	dlbcl	dlbcl	pqtl	Wald ratio	1	0.848485	1.50303	0.572403
APOA2	dlbcl	dlbcl	pqtl	Wald ratio	1	3.4	1.55077	0.0283463
APOA4	dlbcl	dlbcl	pqtl	Wald ratio	1	-0.319118	0.725735	0.660143
APOBR	dlbcl	dlbcl	pqtl	Wald ratio	1	-0.0126118	0.087746	0.885713
APOD	dlbcl	dlbcl	pqtl	Wald ratio	1	-0.662214	0.467748	0.156849
APOE	dlbcl	dlbcl	pqtl	Wald ratio	1	0.329899	0.131515	0.0121263
APOH	dlbcl	dlbcl	pqtl	Wald ratio	1	0.358525	0.335453	0.28517
APOL1	dlbcl	dlbcl	pqtl	Wald ratio	1	0.614706	0.439542	0.161959
APOM	dlbcl	dlbcl	pqtl	Wald ratio	1	-1.61005	0.805952	0.0457489
APP	dlbcl	dlbcl	pqtl	Wald ratio	1	-0.701449	1.51449	0.643251
AREG	dlbcl	dlbcl	pqtl	Wald ratio	1	0.117178	0.752147	0.876198
ARFIP1	dlbcl	dlbcl	pqtl	Wald ratio	1	0.140645	0.634194	0.824493
ARG1	dlbcl	dlbcl	pqtl	Wald ratio	1	-0.0538136	0.49322	0.913118
ARHGAP25	dlbcl	dlbcl	pqtl	Wald ratio	1	1.48058	1.09903	0.177924
ARHGAP45	dlbcl	dlbcl	pqtl	Wald ratio	1	1.6169	1.39577	0.24669
ARHGEF10	dlbcl	dlbcl	pqtl	Wald ratio	1	0.136774	0.358065	0.702475
ARHGEF5	dlbcl	dlbcl	pqtl	Wald ratio	1	0.172973	0.25444	0.49662
ARL2BP	dlbcl	dlbcl	pqtl	Wald ratio	1	1.40456	0.959613	0.143282
ARSA	dlbcl	dlbcl	pqtl	Wald ratio	1	-0.382394	0.282254	0.175484
ART5	dlbcl	dlbcl	pqtl	Wald ratio	1	-0.398864	0.539773	0.459939
ASAH2	dlbcl	dlbcl	pqtl	Wald ratio	1	-0.176077	0.186478	0.345056
ASGR1	dlbcl	dlbcl	pqtl	Wald ratio	1	0.558511	0.601596	0.353209
ASGR2	dlbcl	dlbcl	pqtl	Wald ratio	1	0.125316	0.356962	0.72554
ASRGL1	dlbcl	dlbcl	pqtl	Wald ratio	1	0.125606	0.287062	0.661706
ATG4A	dlbcl	dlbcl	pqtl	Wald ratio	1	-0.146154	1.03205	0.887384
ATP5IF1	dlbcl	dlbcl	pqtl	Wald ratio	1	-0.112844	0.955046	0.905944
ATP6V1G2	dlbcl	dlbcl	pqtl	Wald ratio	1	-0.2125	0.861	0.805058
ATRAID	dlbcl	dlbcl	pqtl	Wald ratio	1	0.390217	0.407609	0.338399
ATXN10	dlbcl	dlbcl	pqtl	Wald ratio	1	1.73646	1.13229	0.125133
ATXN3	dlbcl	dlbcl	pqtl	Wald ratio	1	-0.0792079	0.388779	0.83856
AXIN1	dlbcl	dlbcl	pqtl	Wald ratio	1	0.436364	2.23636	0.845297
B3GNT7	dlbcl	dlbcl	pqtl	Wald ratio	1	-0.121888	0.14446	0.398809
B4GALT1	dlbcl	dlbcl	pqtl	Wald ratio	1	0.474522	0.482803	0.325681
B4GAT1	dlbcl	dlbcl	pqtl	Wald ratio	1	-0.15	0.385667	0.697323
BACH1	dlbcl	dlbcl	pqtl	Wald ratio	1	-0.297826	2.15217	0.889937
BAG3	dlbcl	dlbcl	pqtl	Wald ratio	1	-0.509043	1.39628	0.715431
BAIAP2	dlbcl	dlbcl	pqtl	Wald ratio	1	-0.203488	1.33256	0.878631
BAMBI	dlbcl	dlbcl	pqtl	Wald ratio	1	5.8	2.40476	0.0158705
BANK1	dlbcl	dlbcl	pqtl	Wald ratio	1	-2.19716	0.908753	0.0156159
BAP18	dlbcl	dlbcl	pqtl	Wald ratio	1	-0.466337	1.41782	0.742223
BCAM	dlbcl	dlbcl	pqtl	Wald ratio	1	-0.644175	0.645307	0.318161
BCAN	dlbcl	dlbcl	pqtl	Wald ratio	1	-0.347436	0.45641	0.446516
BCAT1	dlbcl	dlbcl	pqtl	Wald ratio	1	-0.905263	0.409825	0.0271813
BCHE	dlbcl	dlbcl	pqtl	Wald ratio	1	-0.383944	0.22548	0.0886081
BCL2L15	dlbcl	dlbcl	pqtl	Wald ratio	1	0.125123	0.56601	0.825044
BCR	dlbcl	dlbcl	pqtl	Wald ratio	1	0.657411	1.57955	0.677263
BDNF	dlbcl	dlbcl	pqtl	Wald ratio	1	0.373427	1.18601	0.752869
BID	dlbcl	dlbcl	pqtl	Wald ratio	1	0.755968	1.1565	0.513325
BIRC2	dlbcl	dlbcl	pqtl	Wald ratio	1	-1.08147	1.34914	0.422786
BLMH	dlbcl	dlbcl	pqtl	Wald ratio	1	-0.0924528	0.176844	0.601118
BLNK	dlbcl	dlbcl	pqtl	Wald ratio	1	-0.753901	1.59929	0.637357
BLVRB	dlbcl	dlbcl	pqtl	Wald ratio	1	0.747353	0.713019	0.294568
BMP10	dlbcl	dlbcl	pqtl	Wald ratio	1	-0.408894	0.267322	0.126117
BMP6	dlbcl	dlbcl	pqtl	Wald ratio	1	-0.205072	0.712319	0.773428
BMPER	dlbcl	dlbcl	pqtl	Wald ratio	1	0.483284	0.516119	0.349078
BOC	dlbcl	dlbcl	pqtl	Wald ratio	1	-0.274129	0.546766	0.616114
BOLA1	dlbcl	dlbcl	pqtl	Wald ratio	1	-1.09375	1.1125	0.325536
BOLA2_BOLA2B	dlbcl	dlbcl	pqtl	Wald ratio	1	0.932377	1.42705	0.513524
BPIFA2	dlbcl	dlbcl	pqtl	Wald ratio	1	-0.345602	0.578935	0.550533
BPIFB1	dlbcl	dlbcl	pqtl	Wald ratio	1	0.157656	0.235407	0.503039
BPIFB2	dlbcl	dlbcl	pqtl	Wald ratio	1	0.752555	0.382847	0.0493354
BRSK2	dlbcl	dlbcl	pqtl	Wald ratio	1	0.0424448	0.174703	0.808041
BSG	dlbcl	dlbcl	pqtl	Wald ratio	1	1.55	0.794037	0.0509322
BST1	dlbcl	dlbcl	pqtl	Wald ratio	1	0.0707124	0.0970317	0.466151
BST2	dlbcl	dlbcl	pqtl	Wald ratio	1	0.104334	0.520124	0.841015
BTC	dlbcl	dlbcl	pqtl	Wald ratio	1	0.0783694	0.237105	0.741002
BTD	dlbcl	dlbcl	pqtl	Wald ratio	1	-0.0523227	0.136002	0.700446
BTN1A1	dlbcl	dlbcl	pqtl	Wald ratio	1	-0.701678	0.45906	0.126386
BTN2A1	dlbcl	dlbcl	pqtl	Wald ratio	1	0.713466	0.536645	0.183685
BTN3A2	dlbcl	dlbcl	pqtl	Wald ratio	1	-0.404522	0.190852	0.0340432
C1GALT1C1	dlbcl	dlbcl	pqtl	Wald ratio	1	1.03127	1.73213	0.551593
C1QA	dlbcl	dlbcl	pqtl	Wald ratio	1	-0.377295	0.272142	0.165628
C1QTNF1	dlbcl	dlbcl	pqtl	Wald ratio	1	-0.0997416	0.622997	0.872803
C1QTNF5	dlbcl	dlbcl	pqtl	Wald ratio	1	0.307742	0.810323	0.704111
C1QTNF9	dlbcl	dlbcl	pqtl	Wald ratio	1	0.0218778	0.113552	0.847219
C1R	dlbcl	dlbcl	pqtl	Wald ratio	1	0.342411	0.290402	0.238361
C1RL	dlbcl	dlbcl	pqtl	Wald ratio	1	-0.0179405	0.23492	0.939126
C1S	dlbcl	dlbcl	pqtl	Wald ratio	1	0.220859	0.197699	0.263932
C2CD2L	dlbcl	dlbcl	pqtl	Wald ratio	1	1.5434	1.90755	0.418458
C4BPB	dlbcl	dlbcl	pqtl	Wald ratio	1	-0.145763	0.728814	0.841481
C5	dlbcl	dlbcl	pqtl	Wald ratio	1	-0.0340278	0.683333	0.960284
C7	dlbcl	dlbcl	pqtl	Wald ratio	1	-0.189814	0.123331	0.123789
C7orf50	dlbcl	dlbcl	pqtl	Wald ratio	1	0.13775	0.318297	0.665181
C8B	dlbcl	dlbcl	pqtl	Wald ratio	1	0.0583333	0.199405	0.769876
C9	dlbcl	dlbcl	pqtl	Wald ratio	1	-0.912934	1.09559	0.404688
CA1	dlbcl	dlbcl	pqtl	Wald ratio	1	-2.11235	1.27037	0.0963566
CA12	dlbcl	dlbcl	pqtl	Wald ratio	1	-0.434043	0.371277	0.242382
CA13	dlbcl	dlbcl	pqtl	Wald ratio	1	-0.168544	0.44233	0.703177
CA2	dlbcl	dlbcl	pqtl	Wald ratio	1	-1.91546	1.04021	0.065559
CA3	dlbcl	dlbcl	pqtl	Wald ratio	1	0.977059	0.769412	0.204128
CA4	dlbcl	dlbcl	pqtl	Wald ratio	1	0.190196	0.286275	0.506445
CA5A	dlbcl	dlbcl	pqtl	Wald ratio	1	-0.00568603	0.169716	0.973273
CA6	dlbcl	dlbcl	pqtl	Wald ratio	1	0.191654	0.163189	0.240223
CA9	dlbcl	dlbcl	pqtl	Wald ratio	1	0.730785	1.00098	0.465348
CACNB3	dlbcl	dlbcl	pqtl	Wald ratio	1	2.06281	1.04132	0.0475966
CACYBP	dlbcl	dlbcl	pqtl	Wald ratio	1	0.40791	0.925989	0.659566
CALB1	dlbcl	dlbcl	pqtl	Wald ratio	1	-1.7338	1.42407	0.223418
CALCB	dlbcl	dlbcl	pqtl	Wald ratio	1	1.01667	1.02652	0.321976
CALCOCO1	dlbcl	dlbcl	pqtl	Wald ratio	1	0.796241	0.811278	0.326364
CALCOCO2	dlbcl	dlbcl	pqtl	Wald ratio	1	0.490411	1.79726	0.784956
CAMKK1	dlbcl	dlbcl	pqtl	Wald ratio	1	0.222028	0.372727	0.551386
CANT1	dlbcl	dlbcl	pqtl	Wald ratio	1	-0.470335	0.802871	0.557999
CAPG	dlbcl	dlbcl	pqtl	Wald ratio	1	0.0710434	0.117937	0.546917
CARHSP1	dlbcl	dlbcl	pqtl	Wald ratio	1	0.982716	1.22716	0.423245
CASP1	dlbcl	dlbcl	pqtl	Wald ratio	1	-0.373333	1.99	0.851187
CASP10	dlbcl	dlbcl	pqtl	Wald ratio	1	-0.797207	0.551397	0.148235
CASP7	dlbcl	dlbcl	pqtl	Wald ratio	1	-0.329538	0.359418	0.359213
CASP8	dlbcl	dlbcl	pqtl	Wald ratio	1	-0.285032	0.505414	0.572783
CAT	dlbcl	dlbcl	pqtl	Wald ratio	1	0.3	0.667582	0.653156
CBLIF	dlbcl	dlbcl	pqtl	Wald ratio	1	0.175909	0.475	0.711133
CBLN4	dlbcl	dlbcl	pqtl	Wald ratio	1	0.505376	0.634946	0.426069
CC2D1A	dlbcl	dlbcl	pqtl	Wald ratio	1	2.91564	2.23558	0.192166
CCDC134	dlbcl	dlbcl	pqtl	Wald ratio	1	-2.47458	1.68983	0.143087
CCDC50	dlbcl	dlbcl	pqtl	Wald ratio	1	-0.153102	0.591067	0.795615
CCDC80	dlbcl	dlbcl	pqtl	Wald ratio	1	0.021875	1.69687	0.989714
CCER2	dlbcl	dlbcl	pqtl	Wald ratio	1	-0.493696	0.333478	0.138755
CCL13	dlbcl	dlbcl	pqtl	Wald ratio	1	-0.562658	0.460338	0.221604
CCL14	dlbcl	dlbcl	pqtl	Wald ratio	1	-0.0199599	0.18666	0.914843
CCL16	dlbcl	dlbcl	pqtl	Wald ratio	1	0.125603	0.163259	0.441687
CCL17	dlbcl	dlbcl	pqtl	Wald ratio	1	0.675462	0.589446	0.251826
CCL18	dlbcl	dlbcl	pqtl	Wald ratio	1	0.0458824	0.200147	0.81868
CCL19	dlbcl	dlbcl	pqtl	Wald ratio	1	-2.55566	1.27358	0.0447852
CCL2	dlbcl	dlbcl	pqtl	Wald ratio	1	-1.29855	1.73478	0.454136
CCL20	dlbcl	dlbcl	pqtl	Wald ratio	1	1.56279	1.28256	0.223036
CCL21	dlbcl	dlbcl	pqtl	Wald ratio	1	0.50099	1.08218	0.643403
CCL22	dlbcl	dlbcl	pqtl	Wald ratio	1	-0.480702	1.48471	0.746114
CCL23	dlbcl	dlbcl	pqtl	Wald ratio	1	0.210654	0.281869	0.454854
CCL24	dlbcl	dlbcl	pqtl	Wald ratio	1	-0.121267	0.137582	0.378091
CCL25	dlbcl	dlbcl	pqtl	Wald ratio	1	0.109881	0.144796	0.447929
CCL26	dlbcl	dlbcl	pqtl	Wald ratio	1	-0.477333	0.417333	0.252719
CCL27	dlbcl	dlbcl	pqtl	Wald ratio	1	0.482372	0.500641	0.335292
CCL3	dlbcl	dlbcl	pqtl	Wald ratio	1	-0.418571	0.314524	0.183252
CCL5	dlbcl	dlbcl	pqtl	Wald ratio	1	-1.12511	0.561472	0.0450856
CCL7	dlbcl	dlbcl	pqtl	Wald ratio	1	0.330928	1.04433	0.751334
CCL8	dlbcl	dlbcl	pqtl	Wald ratio	1	-0.156285	0.128705	0.224639
CCN1	dlbcl	dlbcl	pqtl	Wald ratio	1	0.0892308	0.926154	0.923246
CCN2	dlbcl	dlbcl	pqtl	Wald ratio	1	-0.25481	0.32828	0.437632
CCN3	dlbcl	dlbcl	pqtl	Wald ratio	1	-0.0125	0.458333	0.978242
CCN4	dlbcl	dlbcl	pqtl	Wald ratio	1	-0.0538636	0.226136	0.811733
CCND2	dlbcl	dlbcl	pqtl	Wald ratio	1	-0.48284	1.73728	0.781067
CCS	dlbcl	dlbcl	pqtl	Wald ratio	1	-0.43691	0.212232	0.0395282
CD101	dlbcl	dlbcl	pqtl	Wald ratio	1	0.0608527	0.124806	0.625849
CD109	dlbcl	dlbcl	pqtl	Wald ratio	1	0.0301775	0.125562	0.810067
CD14	dlbcl	dlbcl	pqtl	Wald ratio	1	0.136422	0.346965	0.694182
CD163	dlbcl	dlbcl	pqtl	Wald ratio	1	0.123429	0.934286	0.894897
CD164	dlbcl	dlbcl	pqtl	Wald ratio	1	0.297987	0.680537	0.661481
CD164L2	dlbcl	dlbcl	pqtl	Wald ratio	1	0.169054	0.208696	0.417912
CD177	dlbcl	dlbcl	pqtl	Wald ratio	1	-0.0281457	0.134161	0.833831
CD1C	dlbcl	dlbcl	pqtl	Wald ratio	1	0.648592	0.829321	0.43417
CD2	dlbcl	dlbcl	pqtl	Wald ratio	1	-1.13014	2.71872	0.677639
CD200	dlbcl	dlbcl	pqtl	Wald ratio	1	-0.683582	0.526119	0.193844
CD200R1	dlbcl	dlbcl	pqtl	Wald ratio	1	0.373696	0.185072	0.0434674
CD207	dlbcl	dlbcl	pqtl	Wald ratio	1	0.191183	0.245591	0.436299
CD209	dlbcl	dlbcl	pqtl	Wald ratio	1	0.405967	0.257757	0.115256
CD22	dlbcl	dlbcl	pqtl	Wald ratio	1	0.119931	0.390378	0.758677
CD226	dlbcl	dlbcl	pqtl	Wald ratio	1	-0.832432	0.381081	0.0289331
CD244	dlbcl	dlbcl	pqtl	Wald ratio	1	-0.480009	0.463108	0.299971
CD248	dlbcl	dlbcl	pqtl	Wald ratio	1	1.38284	2.46501	0.574806
CD27	dlbcl	dlbcl	pqtl	Wald ratio	1	-0.207639	0.4375	0.63507
CD274	dlbcl	dlbcl	pqtl	Wald ratio	1	-0.333824	0.323235	0.301718
CD276	dlbcl	dlbcl	pqtl	Wald ratio	1	0.134002	0.115189	0.2447
CD2AP	dlbcl	dlbcl	pqtl	Wald ratio	1	-0.0202614	0.394444	0.959033
CD300A	dlbcl	dlbcl	pqtl	Wald ratio	1	0.811876	0.491222	0.0983781
CD300C	dlbcl	dlbcl	pqtl	Wald ratio	1	-0.0302222	0.208	0.884475
CD300E	dlbcl	dlbcl	pqtl	Wald ratio	1	-0.304843	0.303704	0.315498
CD300LF	dlbcl	dlbcl	pqtl	Wald ratio	1	0.110258	0.0936187	0.238901
CD300LG	dlbcl	dlbcl	pqtl	Wald ratio	1	-0.124099	0.264231	0.638599
CD302	dlbcl	dlbcl	pqtl	Wald ratio	1	-0.878892	0.45066	0.0511482
CD33	dlbcl	dlbcl	pqtl	Wald ratio	1	0.143622	0.0855442	0.0931664
CD34	dlbcl	dlbcl	pqtl	Wald ratio	1	0.768571	1.48571	0.604941
CD36	dlbcl	dlbcl	pqtl	Wald ratio	1	-0.72406	0.371429	0.0512485
CD38	dlbcl	dlbcl	pqtl	Wald ratio	1	0.106601	0.292176	0.715221
CD4	dlbcl	dlbcl	pqtl	Wald ratio	1	-0.56408	0.311782	0.0704174
CD40	dlbcl	dlbcl	pqtl	Wald ratio	1	-0.206888	0.262945	0.431392
CD48	dlbcl	dlbcl	pqtl	Wald ratio	1	-0.592819	0.195177	0.00238674
CD5	dlbcl	dlbcl	pqtl	Wald ratio	1	-0.619531	0.847656	0.464855
CD55	dlbcl	dlbcl	pqtl	Wald ratio	1	0.168271	0.244201	0.49078
CD58	dlbcl	dlbcl	pqtl	Wald ratio	1	-0.215538	0.492829	0.661859
CD59	dlbcl	dlbcl	pqtl	Wald ratio	1	-0.136681	0.441921	0.757102
CD5L	dlbcl	dlbcl	pqtl	Wald ratio	1	0.656784	0.49196	0.181865
CD6	dlbcl	dlbcl	pqtl	Wald ratio	1	-0.000742574	0.140965	0.995797
CD63	dlbcl	dlbcl	pqtl	Wald ratio	1	-2.12741	2.23972	0.342185
CD69	dlbcl	dlbcl	pqtl	Wald ratio	1	-0.582353	1.95098	0.765327
CD7	dlbcl	dlbcl	pqtl	Wald ratio	1	0.32552	0.228778	0.154776
CD72	dlbcl	dlbcl	pqtl	Wald ratio	1	-0.998137	0.759006	0.188491
CD74	dlbcl	dlbcl	pqtl	Wald ratio	1	-1.5069	2.32759	0.517368
CD79B	dlbcl	dlbcl	pqtl	Wald ratio	1	-0.645	0.634375	0.309273
CD80	dlbcl	dlbcl	pqtl	Wald ratio	1	0.0570707	0.264478	0.829154
CD83	dlbcl	dlbcl	pqtl	Wald ratio	1	-0.453807	0.624873	0.467692
CD8A	dlbcl	dlbcl	pqtl	Wald ratio	1	-0.303188	0.473913	0.522332
CD99L2	dlbcl	dlbcl	pqtl	Wald ratio	1	0.332323	0.646465	0.607208
CDA	dlbcl	dlbcl	pqtl	Wald ratio	1	0.2182	0.246012	0.375106
CDC27	dlbcl	dlbcl	pqtl	Wald ratio	1	-0.950758	1.38485	0.492371
CDCP1	dlbcl	dlbcl	pqtl	Wald ratio	1	-0.422373	0.422712	0.317699
CDH1	dlbcl	dlbcl	pqtl	Wald ratio	1	-1.93191	2.15745	0.370539
CDH15	dlbcl	dlbcl	pqtl	Wald ratio	1	-0.0648148	0.304398	0.831383
CDH2	dlbcl	dlbcl	pqtl	Wald ratio	1	1.82396	1.21979	0.134835
CDH23	dlbcl	dlbcl	pqtl	Wald ratio	1	0.993631	0.885987	0.262077
CDH3	dlbcl	dlbcl	pqtl	Wald ratio	1	-1.3591	2.00598	0.498074
CDH5	dlbcl	dlbcl	pqtl	Wald ratio	1	0.474662	0.469257	0.311768
CDH6	dlbcl	dlbcl	pqtl	Wald ratio	1	0.158835	0.197189	0.420532
CDHR1	dlbcl	dlbcl	pqtl	Wald ratio	1	0.465198	0.444934	0.295771
CDHR5	dlbcl	dlbcl	pqtl	Wald ratio	1	0.150078	0.205008	0.464131
CDKN1A	dlbcl	dlbcl	pqtl	Wald ratio	1	0.464662	0.81391	0.568067
CDNF	dlbcl	dlbcl	pqtl	Wald ratio	1	0.0187386	0.209506	0.928731
CEACAM1	dlbcl	dlbcl	pqtl	Wald ratio	1	-0.122437	0.360348	0.734026
CEACAM16	dlbcl	dlbcl	pqtl	Wald ratio	1	-0.404762	0.301488	0.179419
CEACAM19	dlbcl	dlbcl	pqtl	Wald ratio	1	1.79468	0.793355	0.0236885
CEACAM20	dlbcl	dlbcl	pqtl	Wald ratio	1	-0.811111	0.912593	0.374111
CEACAM21	dlbcl	dlbcl	pqtl	Wald ratio	1	0.137372	0.0898464	0.126273
CEACAM5	dlbcl	dlbcl	pqtl	Wald ratio	1	0.50041	0.338462	0.139278
CEACAM6	dlbcl	dlbcl	pqtl	Wald ratio	1	-0.399225	0.835659	0.632838
CEACAM8	dlbcl	dlbcl	pqtl	Wald ratio	1	-0.39313	0.822901	0.632838
CEBPB	dlbcl	dlbcl	pqtl	Wald ratio	1	-1.56786	1.81071	0.386557
CELA2A	dlbcl	dlbcl	pqtl	Wald ratio	1	0.186923	1.85154	0.919586
CELA3A	dlbcl	dlbcl	pqtl	Wald ratio	1	0.887879	0.506494	0.0796035
CELSR2	dlbcl	dlbcl	pqtl	Wald ratio	1	0.587583	0.265188	0.0267107
CENPF	dlbcl	dlbcl	pqtl	Wald ratio	1	-2.23485	2.12273	0.292424
CEP152	dlbcl	dlbcl	pqtl	Wald ratio	1	0.147727	1.76061	0.93313
CEP170	dlbcl	dlbcl	pqtl	Wald ratio	1	-2.19846	1.62615	0.176395
CEP20	dlbcl	dlbcl	pqtl	Wald ratio	1	-0.185514	1.29953	0.886484
CEP43	dlbcl	dlbcl	pqtl	Wald ratio	1	0.267568	1.33784	0.841481
CEP85	dlbcl	dlbcl	pqtl	Wald ratio	1	0.767857	1.25286	0.539952
CES1	dlbcl	dlbcl	pqtl	Wald ratio	1	-0.309067	0.219014	0.158193
CES2	dlbcl	dlbcl	pqtl	Wald ratio	1	-3.01723	1.97313	0.126224
CES3	dlbcl	dlbcl	pqtl	Wald ratio	1	-0.189686	0.882623	0.829836
CETN3	dlbcl	dlbcl	pqtl	Wald ratio	1	0.0677966	0.701695	0.923029
CFB	dlbcl	dlbcl	pqtl	Wald ratio	1	-0.110772	0.332154	0.738761
CFD	dlbcl	dlbcl	pqtl	Wald ratio	1	-0.520442	0.738122	0.480754
CFH	dlbcl	dlbcl	pqtl	Wald ratio	1	-0.150594	0.343943	0.661498
CFHR2	dlbcl	dlbcl	pqtl	Wald ratio	1	-0.0494197	0.104642	0.636732
CFHR4	dlbcl	dlbcl	pqtl	Wald ratio	1	-0.0768153	0.137197	0.575555
CFHR5	dlbcl	dlbcl	pqtl	Wald ratio	1	-0.000510856	0.140677	0.997103
CFI	dlbcl	dlbcl	pqtl	Wald ratio	1	0.371859	0.494472	0.452032
CFP	dlbcl	dlbcl	pqtl	Wald ratio	1	0.340233	0.394031	0.387881
CGA	dlbcl	dlbcl	pqtl	Wald ratio	1	2.385	2.7575	0.387086
CGB3_CGB5_CGB8	dlbcl	dlbcl	pqtl	Wald ratio	1	1.55091	1.79091	0.386496
CGREF1	dlbcl	dlbcl	pqtl	Wald ratio	1	0.266788	0.186679	0.152967
CHAD	dlbcl	dlbcl	pqtl	Wald ratio	1	-0.150247	0.310419	0.628377
CHCHD10	dlbcl	dlbcl	pqtl	Wald ratio	1	-0.63125	1.13203	0.5771
CHCHD6	dlbcl	dlbcl	pqtl	Wald ratio	1	0.190102	0.436177	0.662955
CHGA	dlbcl	dlbcl	pqtl	Wald ratio	1	0.864463	0.583058	0.138171
CHGB	dlbcl	dlbcl	pqtl	Wald ratio	1	0.119765	0.165662	0.469709
CHI3L1	dlbcl	dlbcl	pqtl	Wald ratio	1	0.122388	0.164925	0.458038
CHIT1	dlbcl	dlbcl	pqtl	Wald ratio	1	-0.200279	0.118901	0.0921012
CHL1	dlbcl	dlbcl	pqtl	Wald ratio	1	0.428972	0.388598	0.269638
CHMP1A	dlbcl	dlbcl	pqtl	Wald ratio	1	0.953846	1.09121	0.382054
CHMP6	dlbcl	dlbcl	pqtl	Wald ratio	1	-0.241791	0.574627	0.673916
CHRDL1	dlbcl	dlbcl	pqtl	Wald ratio	1	0.103401	0.277551	0.709484
CIAPIN1	dlbcl	dlbcl	pqtl	Wald ratio	1	-1.44681	2.09362	0.48953
CILP	dlbcl	dlbcl	pqtl	Wald ratio	1	0.0392361	0.346181	0.909761
CKMT1A_CKMT1B	dlbcl	dlbcl	pqtl	Wald ratio	1	1.34889	0.884815	0.127387
CLC	dlbcl	dlbcl	pqtl	Wald ratio	1	0.841377	1.60651	0.600466
CLEC10A	dlbcl	dlbcl	pqtl	Wald ratio	1	-0.0528195	0.190414	0.781478
CLEC11A	dlbcl	dlbcl	pqtl	Wald ratio	1	0.317684	0.386005	0.410505
CLEC12A	dlbcl	dlbcl	pqtl	Wald ratio	1	0.237113	0.236701	0.316468
CLEC14A	dlbcl	dlbcl	pqtl	Wald ratio	1	-1.64615	1.27692	0.197344
CLEC1A	dlbcl	dlbcl	pqtl	Wald ratio	1	0.209241	0.335974	0.533423
CLEC1B	dlbcl	dlbcl	pqtl	Wald ratio	1	-0.0676829	0.691463	0.922025
CLEC3B	dlbcl	dlbcl	pqtl	Wald ratio	1	-0.0110619	0.473009	0.981342
CLEC4A	dlbcl	dlbcl	pqtl	Wald ratio	1	0.308608	0.314076	0.32581
CLEC4C	dlbcl	dlbcl	pqtl	Wald ratio	1	0.117612	0.12896	0.361765
CLEC4D	dlbcl	dlbcl	pqtl	Wald ratio	1	0.24829	0.203219	0.22179
CLEC4M	dlbcl	dlbcl	pqtl	Wald ratio	1	0.456032	0.289544	0.115256
CLEC5A	dlbcl	dlbcl	pqtl	Wald ratio	1	0.536918	0.374552	0.151717
CLEC6A	dlbcl	dlbcl	pqtl	Wald ratio	1	-0.139116	0.186907	0.45669
CLEC7A	dlbcl	dlbcl	pqtl	Wald ratio	1	0.152314	0.134062	0.255896
CLGN	dlbcl	dlbcl	pqtl	Wald ratio	1	-0.0789564	0.149615	0.597687
CLIC5	dlbcl	dlbcl	pqtl	Wald ratio	1	0.681452	0.823387	0.407886
CLIP2	dlbcl	dlbcl	pqtl	Wald ratio	1	-0.577489	0.783117	0.460865
CLMP	dlbcl	dlbcl	pqtl	Wald ratio	1	-0.290062	0.315839	0.358416
CLPS	dlbcl	dlbcl	pqtl	Wald ratio	1	0.373563	0.191762	0.0514087
CLSTN2	dlbcl	dlbcl	pqtl	Wald ratio	1	0.405254	0.612115	0.507935
CLSTN3	dlbcl	dlbcl	pqtl	Wald ratio	1	-0.0186296	0.214133	0.930672
CLUL1	dlbcl	dlbcl	pqtl	Wald ratio	1	0.037377	0.16918	0.825147
CMC1	dlbcl	dlbcl	pqtl	Wald ratio	1	3.14373	1.66688	0.0592956
CNDP1	dlbcl	dlbcl	pqtl	Wald ratio	1	-0.26726	0.367972	0.467651
CNPY4	dlbcl	dlbcl	pqtl	Wald ratio	1	0.287072	0.635741	0.65159
CNTN1	dlbcl	dlbcl	pqtl	Wald ratio	1	0.403465	0.494554	0.414605
CNTN3	dlbcl	dlbcl	pqtl	Wald ratio	1	0.252174	0.457708	0.581668
CNTN4	dlbcl	dlbcl	pqtl	Wald ratio	1	-0.0304762	0.353968	0.931388
CNTN5	dlbcl	dlbcl	pqtl	Wald ratio	1	-0.107614	0.204188	0.598169
CNTNAP2	dlbcl	dlbcl	pqtl	Wald ratio	1	0.205331	0.203676	0.313396
COCH	dlbcl	dlbcl	pqtl	Wald ratio	1	0.281262	0.318935	0.377842
COL15A1	dlbcl	dlbcl	pqtl	Wald ratio	1	0.0561798	0.55618	0.919542
COL1A1	dlbcl	dlbcl	pqtl	Wald ratio	1	-0.733113	0.897283	0.413908
COL24A1	dlbcl	dlbcl	pqtl	Wald ratio	1	0.711786	0.673214	0.290377
COL28A1	dlbcl	dlbcl	pqtl	Wald ratio	1	0	0.127325	1
COL2A1	dlbcl	dlbcl	pqtl	Wald ratio	1	-0.0433243	0.133787	0.746068
COL4A1	dlbcl	dlbcl	pqtl	Wald ratio	1	-0.172826	0.597826	0.772512
COL5A1	dlbcl	dlbcl	pqtl	Wald ratio	1	-0.742534	0.477828	0.12019
COL9A1	dlbcl	dlbcl	pqtl	Wald ratio	1	-0.347558	0.508209	0.494046
COLEC12	dlbcl	dlbcl	pqtl	Wald ratio	1	1.15786	1.00769	0.250545
COMMD1	dlbcl	dlbcl	pqtl	Wald ratio	1	-0.085277	0.384111	0.824305
COMP	dlbcl	dlbcl	pqtl	Wald ratio	1	0.15193	0.558421	0.785568
COMT	dlbcl	dlbcl	pqtl	Wald ratio	1	0.129712	0.218182	0.55217
COQ7	dlbcl	dlbcl	pqtl	Wald ratio	1	-0.0176923	0.801538	0.98239
CPA1	dlbcl	dlbcl	pqtl	Wald ratio	1	-0.653968	0.627778	0.297542
CPA4	dlbcl	dlbcl	pqtl	Wald ratio	1	0.153084	0.188972	0.417889
CPB1	dlbcl	dlbcl	pqtl	Wald ratio	1	-0.0937008	0.930709	0.919807
CPB2	dlbcl	dlbcl	pqtl	Wald ratio	1	0.269789	0.18852	0.152404
CPE	dlbcl	dlbcl	pqtl	Wald ratio	1	0.029918	0.44877	0.946847
CPM	dlbcl	dlbcl	pqtl	Wald ratio	1	0.281605	1.83581	0.878087
CPOX	dlbcl	dlbcl	pqtl	Wald ratio	1	-1.84702	0.786755	0.0188926
CPPED1	dlbcl	dlbcl	pqtl	Wald ratio	1	0.00233415	0.164865	0.988704
CPQ	dlbcl	dlbcl	pqtl	Wald ratio	1	0.25931	0.273846	0.34368
CPVL	dlbcl	dlbcl	pqtl	Wald ratio	1	-0.184917	0.172922	0.284904
CPXM1	dlbcl	dlbcl	pqtl	Wald ratio	1	-0.179726	0.309589	0.561557
CR1	dlbcl	dlbcl	pqtl	Wald ratio	1	0.40055	0.22789	0.0788073
CR2	dlbcl	dlbcl	pqtl	Wald ratio	1	-0.804965	0.676596	0.234154
CRACR2A	dlbcl	dlbcl	pqtl	Wald ratio	1	0.200741	0.773333	0.795189
CRADD	dlbcl	dlbcl	pqtl	Wald ratio	1	-0.183505	1.43918	0.898539
CREG1	dlbcl	dlbcl	pqtl	Wald ratio	1	0.248133	0.677593	0.714218
CRELD1	dlbcl	dlbcl	pqtl	Wald ratio	1	0.124877	0.159804	0.434543
CRELD2	dlbcl	dlbcl	pqtl	Wald ratio	1	-0.27364	0.377025	0.46797
CRH	dlbcl	dlbcl	pqtl	Wald ratio	1	-0.555251	0.284932	0.0513291
CRHBP	dlbcl	dlbcl	pqtl	Wald ratio	1	0.0956063	0.181722	0.59881
CRIP2	dlbcl	dlbcl	pqtl	Wald ratio	1	0.322162	0.672973	0.632141
CRISP2	dlbcl	dlbcl	pqtl	Wald ratio	1	-0.183162	0.201643	0.363693
CRISP3	dlbcl	dlbcl	pqtl	Wald ratio	1	-0.0232014	0.17554	0.894848
CRNN	dlbcl	dlbcl	pqtl	Wald ratio	1	-0.119832	0.170084	0.481093
CRTAC1	dlbcl	dlbcl	pqtl	Wald ratio	1	0.170972	0.1711	0.317672
CRTAM	dlbcl	dlbcl	pqtl	Wald ratio	1	-0.181962	0.317405	0.566455
CRYBB1	dlbcl	dlbcl	pqtl	Wald ratio	1	0.207895	0.657237	0.751762
CRYBB2	dlbcl	dlbcl	pqtl	Wald ratio	1	-1.25069	1.51889	0.410268
CRYGD	dlbcl	dlbcl	pqtl	Wald ratio	1	0.146414	0.147257	0.320092
CRYM	dlbcl	dlbcl	pqtl	Wald ratio	1	0.149757	0.259951	0.56455
CRYZL1	dlbcl	dlbcl	pqtl	Wald ratio	1	-0.170461	0.942005	0.856403
CSF1	dlbcl	dlbcl	pqtl	Wald ratio	1	-0.827684	0.554237	0.135339
CSF1R	dlbcl	dlbcl	pqtl	Wald ratio	1	-0.689435	0.686844	0.315488
CSF2	dlbcl	dlbcl	pqtl	Wald ratio	1	0.363786	0.432099	0.399841
CSF2RB	dlbcl	dlbcl	pqtl	Wald ratio	1	0.0928957	0.0894784	0.299181
CSF3	dlbcl	dlbcl	pqtl	Wald ratio	1	0.864474	1.3	0.506063
CSF3R	dlbcl	dlbcl	pqtl	Wald ratio	1	0.0121795	0.196337	0.950536
CSPG4	dlbcl	dlbcl	pqtl	Wald ratio	1	0.447059	1.05956	0.673077
CST1	dlbcl	dlbcl	pqtl	Wald ratio	1	-0.0611208	0.218039	0.779231
CST3	dlbcl	dlbcl	pqtl	Wald ratio	1	0.215635	0.384365	0.574786
CST5	dlbcl	dlbcl	pqtl	Wald ratio	1	-0.182609	0.137868	0.185331
CST7	dlbcl	dlbcl	pqtl	Wald ratio	1	-0.222344	0.194139	0.252092
CTBS	dlbcl	dlbcl	pqtl	Wald ratio	1	-0.188339	0.287528	0.512448
CTRB1	dlbcl	dlbcl	pqtl	Wald ratio	1	0.237702	0.221364	0.282911
CTRC	dlbcl	dlbcl	pqtl	Wald ratio	1	-0.516123	0.27971	0.0650074
CTRL	dlbcl	dlbcl	pqtl	Wald ratio	1	-0.454737	1.32105	0.730679
CTSB	dlbcl	dlbcl	pqtl	Wald ratio	1	-0.335533	0.23824	0.159018
CTSC	dlbcl	dlbcl	pqtl	Wald ratio	1	0.175077	0.196498	0.372937
CTSD	dlbcl	dlbcl	pqtl	Wald ratio	1	-0.695732	0.435772	0.110366
CTSF	dlbcl	dlbcl	pqtl	Wald ratio	1	0.110233	0.557209	0.843178
CTSO	dlbcl	dlbcl	pqtl	Wald ratio	1	0.696364	0.587273	0.235718
CTSV	dlbcl	dlbcl	pqtl	Wald ratio	1	-0.482519	0.464781	0.299194
CTSZ	dlbcl	dlbcl	pqtl	Wald ratio	1	0.12687	0.317506	0.689463
CWC15	dlbcl	dlbcl	pqtl	Wald ratio	1	2.17937	1.65079	0.186771
CXADR	dlbcl	dlbcl	pqtl	Wald ratio	1	-0.135833	0.8775	0.876982
CXCL1	dlbcl	dlbcl	pqtl	Wald ratio	1	0.0578149	0.170106	0.733951
CXCL10	dlbcl	dlbcl	pqtl	Wald ratio	1	-0.222708	0.26459	0.399949
CXCL11	dlbcl	dlbcl	pqtl	Wald ratio	1	-0.32582	0.403689	0.419605
CXCL13	dlbcl	dlbcl	pqtl	Wald ratio	1	-1.13295	1.57045	0.470652
CXCL14	dlbcl	dlbcl	pqtl	Wald ratio	1	1.56032	1.57619	0.322209
CXCL5	dlbcl	dlbcl	pqtl	Wald ratio	1	0.274957	0.270783	0.309908
CXCL6	dlbcl	dlbcl	pqtl	Wald ratio	1	0.0599284	0.18068	0.740129
CXCL8	dlbcl	dlbcl	pqtl	Wald ratio	1	0.864968	1.57452	0.582763
CYB5R2	dlbcl	dlbcl	pqtl	Wald ratio	1	0.0791809	0.414676	0.848568
CYTL1	dlbcl	dlbcl	pqtl	Wald ratio	1	0.10205	0.150645	0.49814
DAG1	dlbcl	dlbcl	pqtl	Wald ratio	1	0.378125	1.55469	0.807838
DAPK2	dlbcl	dlbcl	pqtl	Wald ratio	1	-0.139063	0.264062	0.598452
DARS1	dlbcl	dlbcl	pqtl	Wald ratio	1	0.495893	0.722587	0.49254
DBH	dlbcl	dlbcl	pqtl	Wald ratio	1	-0.152151	0.112392	0.175816
DBI	dlbcl	dlbcl	pqtl	Wald ratio	1	0.0683386	0.408464	0.867129
DBN1	dlbcl	dlbcl	pqtl	Wald ratio	1	1.5451	1.92549	0.422296
DBNL	dlbcl	dlbcl	pqtl	Wald ratio	1	1.41029	1.56471	0.36742
DCBLD2	dlbcl	dlbcl	pqtl	Wald ratio	1	-0.637034	1.21166	0.59906
DCC	dlbcl	dlbcl	pqtl	Wald ratio	1	-0.220082	0.464754	0.635824
DCN	dlbcl	dlbcl	pqtl	Wald ratio	1	2.49231	2.2125	0.259968
DCTD	dlbcl	dlbcl	pqtl	Wald ratio	1	-0.1625	1.78929	0.927637
DCTPP1	dlbcl	dlbcl	pqtl	Wald ratio	1	2.0759	1.94739	0.286427
DCXR	dlbcl	dlbcl	pqtl	Wald ratio	1	0.334699	0.690984	0.628115
DDAH1	dlbcl	dlbcl	pqtl	Wald ratio	1	-0.71016	0.628342	0.258387
DDC	dlbcl	dlbcl	pqtl	Wald ratio	1	0.242868	0.353529	0.492095
DDI2	dlbcl	dlbcl	pqtl	Wald ratio	1	1.44033	3.38395	0.670374
DDT	dlbcl	dlbcl	pqtl	Wald ratio	1	-0.107071	0.544444	0.844093
DDX58	dlbcl	dlbcl	pqtl	Wald ratio	1	-0.232971	0.386232	0.546383
DECR1	dlbcl	dlbcl	pqtl	Wald ratio	1	-1.17587	1.61437	0.466382
DEFB104A_DEFB104B	dlbcl	dlbcl	pqtl	Wald ratio	1	0.304808	0.489543	0.533523
DEFB4A_DEFB4B	dlbcl	dlbcl	pqtl	Wald ratio	1	2.27229	1.74578	0.193058
DFFA	dlbcl	dlbcl	pqtl	Wald ratio	1	-3.19753	1.24868	0.0104455
DHRS4L2	dlbcl	dlbcl	pqtl	Wald ratio	1	0.238473	0.512366	0.64162
DIPK2B	dlbcl	dlbcl	pqtl	Wald ratio	1	0.281884	0.706522	0.689912
DKK1	dlbcl	dlbcl	pqtl	Wald ratio	1	0.551	0.989	0.57744
DKK3	dlbcl	dlbcl	pqtl	Wald ratio	1	-0.198623	0.284573	0.485198
DKK4	dlbcl	dlbcl	pqtl	Wald ratio	1	0.68422	0.814539	0.400904
DKKL1	dlbcl	dlbcl	pqtl	Wald ratio	1	0.05	0.104435	0.632106
DLL1	dlbcl	dlbcl	pqtl	Wald ratio	1	-0.444444	0.646405	0.491728
DMP1	dlbcl	dlbcl	pqtl	Wald ratio	1	-1.51633	3.88438	0.696266
DNAJA4	dlbcl	dlbcl	pqtl	Wald ratio	1	0.647552	0.944755	0.49308
DNAJB1	dlbcl	dlbcl	pqtl	Wald ratio	1	0.986275	2.08235	0.63576
DNAJB14	dlbcl	dlbcl	pqtl	Wald ratio	1	-1.30339	2.34576	0.57846
DNAJB6	dlbcl	dlbcl	pqtl	Wald ratio	1	-0.195263	0.525263	0.710084
DNER	dlbcl	dlbcl	pqtl	Wald ratio	1	0.182609	0.395652	0.644412
DNM1	dlbcl	dlbcl	pqtl	Wald ratio	1	0.0105431	0.37476	0.977556
DNMBP	dlbcl	dlbcl	pqtl	Wald ratio	1	-0.832394	1.09718	0.448053
DNPEP	dlbcl	dlbcl	pqtl	Wald ratio	1	-0.293291	2.28051	0.897668
DNPH1	dlbcl	dlbcl	pqtl	Wald ratio	1	0.332967	0.39033	0.393637
DOC2B	dlbcl	dlbcl	pqtl	Wald ratio	1	0.879687	1.67031	0.598429
DOK2	dlbcl	dlbcl	pqtl	Wald ratio	1	0.127778	1.82963	0.944323
DPEP1	dlbcl	dlbcl	pqtl	Wald ratio	1	0.0769627	0.12677	0.54378
DPEP2	dlbcl	dlbcl	pqtl	Wald ratio	1	-0.366228	0.62635	0.558748
DPP10	dlbcl	dlbcl	pqtl	Wald ratio	1	-0.140613	0.375862	0.708324
DPP4	dlbcl	dlbcl	pqtl	Wald ratio	1	-0.0414747	0.453917	0.927198
DPP6	dlbcl	dlbcl	pqtl	Wald ratio	1	0.309125	0.419772	0.461479
DPT	dlbcl	dlbcl	pqtl	Wald ratio	1	-0.00154799	0.304334	0.995942
DPY30	dlbcl	dlbcl	pqtl	Wald ratio	1	3.51221	2.26794	0.121469
DRAXIN	dlbcl	dlbcl	pqtl	Wald ratio	1	-0.0557471	0.314943	0.859503
DSC2	dlbcl	dlbcl	pqtl	Wald ratio	1	0.541641	0.487842	0.266878
DSCAM	dlbcl	dlbcl	pqtl	Wald ratio	1	0.201906	0.229372	0.378722
DSG2	dlbcl	dlbcl	pqtl	Wald ratio	1	0.252582	0.480282	0.598955
DSG3	dlbcl	dlbcl	pqtl	Wald ratio	1	-0.633548	0.399677	0.112932
DSG4	dlbcl	dlbcl	pqtl	Wald ratio	1	1.14118	1.92549	0.553403
DTD1	dlbcl	dlbcl	pqtl	Wald ratio	1	0.764103	0.664744	0.250362
DTYMK	dlbcl	dlbcl	pqtl	Wald ratio	1	-2.32734	2.0375	0.253348
DUSP13	dlbcl	dlbcl	pqtl	Wald ratio	1	0.507634	0.374427	0.175176
DUSP29	dlbcl	dlbcl	pqtl	Wald ratio	1	0.764662	0.754135	0.310603
DXO	dlbcl	dlbcl	pqtl	Wald ratio	1	0.0782765	0.253591	0.757571
EBAG9	dlbcl	dlbcl	pqtl	Wald ratio	1	-0.62	1.55538	0.690177
EBI3_IL27	dlbcl	dlbcl	pqtl	Inverse variance weighted	2	0.179415	0.276712	0.516738
ECE1	dlbcl	dlbcl	pqtl	Wald ratio	1	1.04608	1.76328	0.553006
ECHDC3	dlbcl	dlbcl	pqtl	Wald ratio	1	0.318565	0.229536	0.165177
ECHS1	dlbcl	dlbcl	pqtl	Wald ratio	1	-0.943177	0.650336	0.146977
ECI2	dlbcl	dlbcl	pqtl	Wald ratio	1	-0.215194	0.399647	0.590258
ECM1	dlbcl	dlbcl	pqtl	Wald ratio	1	0.278861	0.149475	0.0620978
EDA2R	dlbcl	dlbcl	pqtl	Wald ratio	1	0.546118	0.519686	0.293323
EDAR	dlbcl	dlbcl	pqtl	Wald ratio	1	-0.430787	0.320722	0.179214
EDDM3B	dlbcl	dlbcl	pqtl	Wald ratio	1	-0.0582822	0.715337	0.935064
EDIL3	dlbcl	dlbcl	pqtl	Wald ratio	1	-0.433333	1.42444	0.760966
EDN1	dlbcl	dlbcl	pqtl	Wald ratio	1	0.129771	0.473282	0.783936
EFEMP1	dlbcl	dlbcl	pqtl	Wald ratio	1	0.220976	0.573659	0.700086
EFHD1	dlbcl	dlbcl	pqtl	Wald ratio	1	-0.759355	0.584194	0.193658
EFNA1	dlbcl	dlbcl	pqtl	Wald ratio	1	0.28474	0.317532	0.369864
EGFL7	dlbcl	dlbcl	pqtl	Wald ratio	1	-0.0194245	0.472302	0.967194
EGFLAM	dlbcl	dlbcl	pqtl	Wald ratio	1	-0.173948	0.242877	0.473867
EGLN1	dlbcl	dlbcl	pqtl	Wald ratio	1	-0.365038	0.695113	0.59948
EHBP1	dlbcl	dlbcl	pqtl	Wald ratio	1	-0.696992	0.656015	0.288025
EHD3	dlbcl	dlbcl	pqtl	Wald ratio	1	0.581053	0.583684	0.319497
EIF2AK2	dlbcl	dlbcl	pqtl	Wald ratio	1	-0.440541	0.662162	0.505855
EIF2AK3	dlbcl	dlbcl	pqtl	Wald ratio	1	-0.783333	0.838333	0.350101
EIF5	dlbcl	dlbcl	pqtl	Wald ratio	1	-0.383665	1.40797	0.785241
ELAC1	dlbcl	dlbcl	pqtl	Wald ratio	1	1.37661	1.75867	0.433771
ELN	dlbcl	dlbcl	pqtl	Wald ratio	1	2.33015	1.58235	0.140863
ELOA	dlbcl	dlbcl	pqtl	Wald ratio	1	1.41125	1.25125	0.259374
ENDOU	dlbcl	dlbcl	pqtl	Wald ratio	1	-0.520679	0.352469	0.139613
ENG	dlbcl	dlbcl	pqtl	Wald ratio	1	0.124303	0.397211	0.754327
ENO1	dlbcl	dlbcl	pqtl	Wald ratio	1	0.529278	0.42654	0.214656
ENO3	dlbcl	dlbcl	pqtl	Wald ratio	1	-1.55851	1.07447	0.146921
ENPEP	dlbcl	dlbcl	pqtl	Wald ratio	1	0.423988	1.46324	0.772
ENPP2	dlbcl	dlbcl	pqtl	Wald ratio	1	-0.5076	0.4172	0.223725
ENPP5	dlbcl	dlbcl	pqtl	Wald ratio	1	-0.375105	0.125678	0.00283901
ENPP6	dlbcl	dlbcl	pqtl	Wald ratio	1	-0.237022	0.324612	0.465287
ENPP7	dlbcl	dlbcl	pqtl	Wald ratio	1	0.0522246	0.107733	0.627847
ENSA	dlbcl	dlbcl	pqtl	Wald ratio	1	0.691667	1.8475	0.708122
ENTPD5	dlbcl	dlbcl	pqtl	Wald ratio	1	0.225364	0.198857	0.257089
ENTPD6	dlbcl	dlbcl	pqtl	Wald ratio	1	-0.0753669	0.170702	0.658843
ENTR1	dlbcl	dlbcl	pqtl	Wald ratio	1	-0.0805461	0.637201	0.899411
EPGN	dlbcl	dlbcl	pqtl	Wald ratio	1	-1.27778	2.12593	0.54781
EPHA1	dlbcl	dlbcl	pqtl	Wald ratio	1	-0.401646	0.565021	0.477176
EPHA2	dlbcl	dlbcl	pqtl	Wald ratio	1	-1.56341	0.860163	0.0691283
EPHA4	dlbcl	dlbcl	pqtl	Wald ratio	1	-1.00148	0.726667	0.168146
EPHB6	dlbcl	dlbcl	pqtl	Wald ratio	1	0.0591503	0.363072	0.870584
EPPK1	dlbcl	dlbcl	pqtl	Wald ratio	1	-0.147637	0.261437	0.572268
EPS8L2	dlbcl	dlbcl	pqtl	Wald ratio	1	-0.0416244	0.37665	0.912003
ERBB2	dlbcl	dlbcl	pqtl	Wald ratio	1	0.265772	0.488255	0.586214
ERBB4	dlbcl	dlbcl	pqtl	Wald ratio	1	-1.11942	0.519417	0.0311509
EREG	dlbcl	dlbcl	pqtl	Wald ratio	1	-0.0319588	1.45361	0.982459
ERI1	dlbcl	dlbcl	pqtl	Wald ratio	1	-2.70571	1.92286	0.159388
ERMAP	dlbcl	dlbcl	pqtl	Wald ratio	1	1.11983	1.1819	0.343392
ERN1	dlbcl	dlbcl	pqtl	Wald ratio	1	-1.0645	0.938104	0.256487
ERP44	dlbcl	dlbcl	pqtl	Wald ratio	1	1.94225	2.17422	0.371693
ESAM	dlbcl	dlbcl	pqtl	Wald ratio	1	0.555247	1.14921	0.628986
ESM1	dlbcl	dlbcl	pqtl	Wald ratio	1	0.421466	0.604188	0.485444
EVI5	dlbcl	dlbcl	pqtl	Wald ratio	1	-0.233562	0.788356	0.767028
EXTL1	dlbcl	dlbcl	pqtl	Wald ratio	1	0.269403	0.30796	0.381684
F11	dlbcl	dlbcl	pqtl	Wald ratio	1	0.378442	0.257143	0.141097
F12	dlbcl	dlbcl	pqtl	Wald ratio	1	-0.169923	0.0957155	0.0758499
F13B	dlbcl	dlbcl	pqtl	Wald ratio	1	-0.0638532	0.213945	0.765355
F2	dlbcl	dlbcl	pqtl	Wald ratio	1	-0.734925	0.942974	0.435762
F2R	dlbcl	dlbcl	pqtl	Wald ratio	1	-0.532143	0.896429	0.552763
F7	dlbcl	dlbcl	pqtl	Wald ratio	1	0.369565	0.234651	0.115266
F9	dlbcl	dlbcl	pqtl	Wald ratio	1	-0.141176	0.262353	0.590497
FABP1	dlbcl	dlbcl	pqtl	Wald ratio	1	-1.06667	0.431579	0.0134531
FABP2	dlbcl	dlbcl	pqtl	Wald ratio	1	0.727143	0.484762	0.133614
FABP3	dlbcl	dlbcl	pqtl	Wald ratio	1	1.25385	1.25604	0.318158
FABP4	dlbcl	dlbcl	pqtl	Wald ratio	1	-1.84696	1.21043	0.127044
FABP5	dlbcl	dlbcl	pqtl	Wald ratio	1	-0.876555	0.679426	0.197002
FABP6	dlbcl	dlbcl	pqtl	Wald ratio	1	-0.602206	0.722059	0.404274
FABP9	dlbcl	dlbcl	pqtl	Wald ratio	1	0.839423	1.37212	0.540688
FADD	dlbcl	dlbcl	pqtl	Wald ratio	1	-0.57125	1.23125	0.642677
FAM13A	dlbcl	dlbcl	pqtl	Wald ratio	1	-0.4	0.846821	0.636673
FAM171B	dlbcl	dlbcl	pqtl	Wald ratio	1	-0.227733	0.307467	0.45889
FAM172A	dlbcl	dlbcl	pqtl	Wald ratio	1	2.77978	1.3623	0.0412992
FAM20A	dlbcl	dlbcl	pqtl	Wald ratio	1	-0.352814	0.454978	0.438073
FAM3B	dlbcl	dlbcl	pqtl	Wald ratio	1	-0.480865	0.224931	0.0325304
FAM3C	dlbcl	dlbcl	pqtl	Wald ratio	1	1.67524	1.09048	0.124478
FAM3D	dlbcl	dlbcl	pqtl	Wald ratio	1	-0.0192229	0.302454	0.949323
FAP	dlbcl	dlbcl	pqtl	Wald ratio	1	0.24112	0.385039	0.531169
FARSA	dlbcl	dlbcl	pqtl	Wald ratio	1	-0.329839	1.73468	0.849196
FAS	dlbcl	dlbcl	pqtl	Wald ratio	1	0.158077	0.392308	0.686991
FASLG	dlbcl	dlbcl	pqtl	Wald ratio	1	2.50777	1.40097	0.0734506
FBLN2	dlbcl	dlbcl	pqtl	Wald ratio	1	0.489556	0.444815	0.271078
FBN2	dlbcl	dlbcl	pqtl	Wald ratio	1	-0.461759	0.357553	0.19655
FBP1	dlbcl	dlbcl	pqtl	Wald ratio	1	0.283916	0.380594	0.455679
FCAMR	dlbcl	dlbcl	pqtl	Wald ratio	1	0.0545244	0.27819	0.844613
FCAR	dlbcl	dlbcl	pqtl	Wald ratio	1	0.0404028	0.127844	0.751977
FCER1A	dlbcl	dlbcl	pqtl	Wald ratio	1	-0.714465	0.758491	0.346215
FCER2	dlbcl	dlbcl	pqtl	Wald ratio	1	0.694464	0.342215	0.0424254
FCGR2A	dlbcl	dlbcl	pqtl	Wald ratio	1	0.0225052	0.111218	0.839642
FCGR2B	dlbcl	dlbcl	pqtl	Wald ratio	1	0.0890661	0.223235	0.689908
FCN1	dlbcl	dlbcl	pqtl	Wald ratio	1	0.129452	0.234703	0.581252
FCN2	dlbcl	dlbcl	pqtl	Wald ratio	1	-0.0705691	0.159187	0.657542
FCRL1	dlbcl	dlbcl	pqtl	Wald ratio	1	-0.0383041	0.289181	0.894623
FCRL2	dlbcl	dlbcl	pqtl	Wald ratio	1	0.0598155	0.182872	0.7436
FCRL3	dlbcl	dlbcl	pqtl	Wald ratio	1	-0.0176594	0.103239	0.864182
FCRL6	dlbcl	dlbcl	pqtl	Wald ratio	1	0.122197	0.159191	0.442718
FCRLB	dlbcl	dlbcl	pqtl	Wald ratio	1	0.00599415	0.154898	0.969132
FDX1	dlbcl	dlbcl	pqtl	Wald ratio	1	0.378	2.018	0.851414
FES	dlbcl	dlbcl	pqtl	Wald ratio	1	0.729231	0.766154	0.341195
FETUB	dlbcl	dlbcl	pqtl	Wald ratio	1	0.0876013	0.309156	0.776904
FGA	dlbcl	dlbcl	pqtl	Wald ratio	1	0.798717	1.19928	0.505412
FGF2	dlbcl	dlbcl	pqtl	Wald ratio	1	0.0600281	0.161992	0.710963
FGF21	dlbcl	dlbcl	pqtl	Wald ratio	1	-0.3672	0.7968	0.644911
FGF23	dlbcl	dlbcl	pqtl	Wald ratio	1	-0.0464646	1.04545	0.96455
FGF5	dlbcl	dlbcl	pqtl	Wald ratio	1	0.0528614	0.159337	0.740072
FGFBP1	dlbcl	dlbcl	pqtl	Wald ratio	1	1.2374	0.904065	0.171091
FGFBP2	dlbcl	dlbcl	pqtl	Wald ratio	1	0.0337589	0.187376	0.857022
FGFR2	dlbcl	dlbcl	pqtl	Wald ratio	1	-0.723364	0.929907	0.436634
FGFR4	dlbcl	dlbcl	pqtl	Wald ratio	1	-0.0313568	0.104221	0.763515
FGL1	dlbcl	dlbcl	pqtl	Wald ratio	1	0.0136294	0.162175	0.933023
FGR	dlbcl	dlbcl	pqtl	Wald ratio	1	-1.30894	1.16592	0.26158
FHIT	dlbcl	dlbcl	pqtl	Wald ratio	1	0.579381	1.07938	0.591425
FIS1	dlbcl	dlbcl	pqtl	Wald ratio	1	-0.207365	0.594051	0.727037
FKBP14	dlbcl	dlbcl	pqtl	Wald ratio	1	1.10072	1.90928	0.564269
FKBP1B	dlbcl	dlbcl	pqtl	Wald ratio	1	0.798387	0.556048	0.151053
FKBP4	dlbcl	dlbcl	pqtl	Wald ratio	1	-0.341481	1.95556	0.861377
FKBP5	dlbcl	dlbcl	pqtl	Wald ratio	1	-0.628436	0.53128	0.23686
FLRT2	dlbcl	dlbcl	pqtl	Wald ratio	1	-0.188649	0.185489	0.309134
FLT4	dlbcl	dlbcl	pqtl	Wald ratio	1	-0.182262	0.327494	0.577846
FN1	dlbcl	dlbcl	pqtl	Wald ratio	1	0.0496689	0.264459	0.851023
FNDC1	dlbcl	dlbcl	pqtl	Wald ratio	1	0.117476	0.249272	0.637444
FNTA	dlbcl	dlbcl	pqtl	Wald ratio	1	3.29643	1.73929	0.0580557
FOLH1	dlbcl	dlbcl	pqtl	Wald ratio	1	-0.0360825	1.33299	0.978405
FOLR2	dlbcl	dlbcl	pqtl	Wald ratio	1	0.158879	0.813707	0.845195
FOXJ3	dlbcl	dlbcl	pqtl	Wald ratio	1	-0.153125	1.50937	0.919194
FOXO1	dlbcl	dlbcl	pqtl	Wald ratio	1	2.68679	1.41143	0.0569632
FRZB	dlbcl	dlbcl	pqtl	Wald ratio	1	0.325287	0.354151	0.358357
FSHB	dlbcl	dlbcl	pqtl	Wald ratio	1	-0.431293	0.894558	0.629714
FST	dlbcl	dlbcl	pqtl	Wald ratio	1	0.504687	0.783594	0.519531
FSTL1	dlbcl	dlbcl	pqtl	Wald ratio	1	-0.37483	0.677551	0.580118
FSTL3	dlbcl	dlbcl	pqtl	Wald ratio	1	0.579798	1.2697	0.647928
FTCD	dlbcl	dlbcl	pqtl	Wald ratio	1	-0.0322275	0.687915	0.962634
FUCA1	dlbcl	dlbcl	pqtl	Wald ratio	1	0.337368	0.262632	0.198943
FUOM	dlbcl	dlbcl	pqtl	Wald ratio	1	-1.29961	1.18126	0.271252
FUT1	dlbcl	dlbcl	pqtl	Wald ratio	1	3.28589	1.53804	0.0326454
FUT3_FUT5	dlbcl	dlbcl	pqtl	Wald ratio	1	-0.0812556	0.257399	0.752246
FUT8	dlbcl	dlbcl	pqtl	Wald ratio	1	0.13989	0.138785	0.313473
FXN	dlbcl	dlbcl	pqtl	Wald ratio	1	-0.309091	1.29221	0.810954
FXYD5	dlbcl	dlbcl	pqtl	Wald ratio	1	-0.317358	0.288601	0.271489
GAGE2A	dlbcl	dlbcl	pqtl	Wald ratio	1	0.883908	0.898563	0.325268
GAL	dlbcl	dlbcl	pqtl	Wald ratio	1	2.48986	1.58446	0.116083
GALNT10	dlbcl	dlbcl	pqtl	Wald ratio	1	0.296257	0.277005	0.284845
GALNT2	dlbcl	dlbcl	pqtl	Wald ratio	1	-0.0818815	0.344251	0.811994
GALNT3	dlbcl	dlbcl	pqtl	Wald ratio	1	0.343669	0.283979	0.226206
GALNT5	dlbcl	dlbcl	pqtl	Wald ratio	1	0.450558	0.651301	0.489075
GALNT7	dlbcl	dlbcl	pqtl	Wald ratio	1	1.33572	1.58305	0.3988
GART	dlbcl	dlbcl	pqtl	Wald ratio	1	1.38594	0.978906	0.156833
GAS2	dlbcl	dlbcl	pqtl	Wald ratio	1	0.805085	0.9	0.371034
GAS6	dlbcl	dlbcl	pqtl	Wald ratio	1	-0.115315	0.31021	0.710092
GASK1A	dlbcl	dlbcl	pqtl	Wald ratio	1	-0.0272127	0.135403	0.840718
GBP1	dlbcl	dlbcl	pqtl	Wald ratio	1	-0.00346386	0.222741	0.987593
GBP2	dlbcl	dlbcl	pqtl	Wald ratio	1	-0.249206	0.897619	0.781296
GC	dlbcl	dlbcl	pqtl	Wald ratio	1	0.113531	0.0985974	0.249541
GCHFR	dlbcl	dlbcl	pqtl	Wald ratio	1	0.29009	0.887387	0.743741
GCNT1	dlbcl	dlbcl	pqtl	Wald ratio	1	-0.15743	0.268273	0.55732
GDF15	dlbcl	dlbcl	pqtl	Wald ratio	1	-0.271883	0.489125	0.578309
GDNF	dlbcl	dlbcl	pqtl	Wald ratio	1	0.353165	0.46557	0.448113
GFAP	dlbcl	dlbcl	pqtl	Wald ratio	1	0.855512	1.54055	0.57867
GFRA1	dlbcl	dlbcl	pqtl	Wald ratio	1	0.386007	0.431399	0.370906
GFRA2	dlbcl	dlbcl	pqtl	Wald ratio	1	-0.115646	0.334354	0.729433
GFRAL	dlbcl	dlbcl	pqtl	Wald ratio	1	0.052139	0.329144	0.874135
GGCT	dlbcl	dlbcl	pqtl	Wald ratio	1	1.2359	0.911966	0.175353
GGH	dlbcl	dlbcl	pqtl	Wald ratio	1	0.342302	0.230374	0.137318
GGT1	dlbcl	dlbcl	pqtl	Wald ratio	1	0.438	0.4172	0.293784
GGT5	dlbcl	dlbcl	pqtl	Wald ratio	1	0.151368	0.348328	0.663885
GHR	dlbcl	dlbcl	pqtl	Wald ratio	1	0.0716788	0.162774	0.659677
GHRL	dlbcl	dlbcl	pqtl	Wald ratio	1	-0.27442	0.235725	0.244361
GIMAP7	dlbcl	dlbcl	pqtl	Wald ratio	1	-0.0216667	0.174667	0.901279
GIP	dlbcl	dlbcl	pqtl	Wald ratio	1	1.14167	2.255	0.612658
GIPC2	dlbcl	dlbcl	pqtl	Wald ratio	1	-0.041806	0.417391	0.920217
GIPC3	dlbcl	dlbcl	pqtl	Wald ratio	1	-0.550588	0.420706	0.190628
GIT1	dlbcl	dlbcl	pqtl	Wald ratio	1	3.40356	2.95689	0.249708
GLA	dlbcl	dlbcl	pqtl	Wald ratio	1	0.237525	0.204584	0.245637
GLB1	dlbcl	dlbcl	pqtl	Wald ratio	1	0.402273	0.456818	0.378536
GLO1	dlbcl	dlbcl	pqtl	Wald ratio	1	0.27362	0.312883	0.381841
GLRX	dlbcl	dlbcl	pqtl	Wald ratio	1	0.231325	0.256225	0.366621
GLRX5	dlbcl	dlbcl	pqtl	Wald ratio	1	0.810619	0.880531	0.357258
GLT8D2	dlbcl	dlbcl	pqtl	Wald ratio	1	0.00948012	0.383945	0.980301
GM2A	dlbcl	dlbcl	pqtl	Wald ratio	1	-0.145633	0.156175	0.351079
GMFG	dlbcl	dlbcl	pqtl	Wald ratio	1	1.54397	1.57155	0.32588
GMPR2	dlbcl	dlbcl	pqtl	Wald ratio	1	-1.01818	0.430884	0.0181274
GNAS	dlbcl	dlbcl	pqtl	Wald ratio	1	-0.410667	1.328	0.757141
GNLY	dlbcl	dlbcl	pqtl	Wald ratio	1	0.1	0.157692	0.525985
GNPDA1	dlbcl	dlbcl	pqtl	Wald ratio	1	0.0846939	1.22755	0.944994
GOLGA3	dlbcl	dlbcl	pqtl	Wald ratio	1	-0.543443	0.880328	0.537025
GOLM2	dlbcl	dlbcl	pqtl	Wald ratio	1	-1.00489	0.787184	0.201756
GP6	dlbcl	dlbcl	pqtl	Wald ratio	1	0.104835	0.381934	0.783713
GPA33	dlbcl	dlbcl	pqtl	Wald ratio	1	0.407757	0.488011	0.403409
GPC1	dlbcl	dlbcl	pqtl	Wald ratio	1	0.2728	0.2976	0.359317
GPC5	dlbcl	dlbcl	pqtl	Wald ratio	1	-0.232872	0.122722	0.0577545
GPD1	dlbcl	dlbcl	pqtl	Wald ratio	1	0.964527	2.96537	0.744982
GPIHBP1	dlbcl	dlbcl	pqtl	Wald ratio	1	1.01192	0.381154	0.00793333
GPNMB	dlbcl	dlbcl	pqtl	Wald ratio	1	0.00977654	0.351769	0.977828
GPR15L	dlbcl	dlbcl	pqtl	Wald ratio	1	0.530556	0.478241	0.267262
GPR37	dlbcl	dlbcl	pqtl	Wald ratio	1	0.23961	0.162468	0.140261
GPRC5C	dlbcl	dlbcl	pqtl	Wald ratio	1	0.780734	0.850917	0.35887
GRAP2	dlbcl	dlbcl	pqtl	Wald ratio	1	-2.10596	1.27228	0.0978702
GRHPR	dlbcl	dlbcl	pqtl	Wald ratio	1	-0.476894	0.383712	0.213926
GRIK2	dlbcl	dlbcl	pqtl	Wald ratio	1	0.0429558	0.329972	0.896424
GRK5	dlbcl	dlbcl	pqtl	Wald ratio	1	-0.0539846	0.431877	0.900524
GRN	dlbcl	dlbcl	pqtl	Wald ratio	1	-0.6492	0.4152	0.117915
GRP	dlbcl	dlbcl	pqtl	Wald ratio	1	0.119457	0.259276	0.64499
GRPEL1	dlbcl	dlbcl	pqtl	Wald ratio	1	-3.15185	1.78765	0.07788
GSN	dlbcl	dlbcl	pqtl	Wald ratio	1	2.12395	1.75102	0.225138
GSR	dlbcl	dlbcl	pqtl	Wald ratio	1	-0.412698	0.962698	0.668149
GSTA1	dlbcl	dlbcl	pqtl	Wald ratio	1	0.204403	0.310692	0.510606
GSTA3	dlbcl	dlbcl	pqtl	Wald ratio	1	0.207006	0.31465	0.510606
GSTP1	dlbcl	dlbcl	pqtl	Wald ratio	1	-1.21531	0.52449	0.0204972
GSTT2B	dlbcl	dlbcl	pqtl	Wald ratio	1	0.0437681	0.0984541	0.656642
GYS1	dlbcl	dlbcl	pqtl	Wald ratio	1	1.16591	2.33182	0.617075
GZMB	dlbcl	dlbcl	pqtl	Wald ratio	1	0.298857	0.347714	0.39007
GZMH	dlbcl	dlbcl	pqtl	Wald ratio	1	0.626689	0.815061	0.441961
HADH	dlbcl	dlbcl	pqtl	Wald ratio	1	0.830928	2.57423	0.746856
HAGH	dlbcl	dlbcl	pqtl	Wald ratio	1	1.35166	1.20026	0.260104
HAVCR1	dlbcl	dlbcl	pqtl	Wald ratio	1	-0.240351	0.217763	0.269712
HAVCR2	dlbcl	dlbcl	pqtl	Wald ratio	1	0.100966	0.339614	0.76624
HBEGF	dlbcl	dlbcl	pqtl	Wald ratio	1	-2.76122	1.99796	0.166965
HBQ1	dlbcl	dlbcl	pqtl	Wald ratio	1	-0.505556	0.296667	0.0883587
HBZ	dlbcl	dlbcl	pqtl	Wald ratio	1	0.104767	0.100681	0.298071
HCG22	dlbcl	dlbcl	pqtl	Wald ratio	1	0.309726	0.305486	0.310641
HCLS1	dlbcl	dlbcl	pqtl	Wald ratio	1	-2.00187	1.32336	0.130353
HDDC2	dlbcl	dlbcl	pqtl	Wald ratio	1	-0.0258661	0.187298	0.890161
HDGF	dlbcl	dlbcl	pqtl	Wald ratio	1	0.0604329	0.0894372	0.49923
HDGFL2	dlbcl	dlbcl	pqtl	Wald ratio	1	2.73542	2.05625	0.183421
HEBP1	dlbcl	dlbcl	pqtl	Wald ratio	1	-1.90748	1.11054	0.0858676
HEG1	dlbcl	dlbcl	pqtl	Wald ratio	1	-0.115385	0.969231	0.905238
HEPACAM2	dlbcl	dlbcl	pqtl	Wald ratio	1	3.35331	4.55066	0.461193
HEPH	dlbcl	dlbcl	pqtl	Wald ratio	1	0.461917	1.19694	0.699559
HGF	dlbcl	dlbcl	pqtl	Wald ratio	1	2.42896	1.31803	0.0653481
HGFAC	dlbcl	dlbcl	pqtl	Wald ratio	1	0.0456212	0.234216	0.845563
HIP1R	dlbcl	dlbcl	pqtl	Wald ratio	1	-1.82851	0.814859	0.0248348
HLA-E	dlbcl	dlbcl	pqtl	Wald ratio	1	0.662558	0.456977	0.147094
HMBS	dlbcl	dlbcl	pqtl	Wald ratio	1	1.82298	1.08172	0.0919399
HMCN2	dlbcl	dlbcl	pqtl	Wald ratio	1	0.0603618	0.161678	0.70889
HMOX1	dlbcl	dlbcl	pqtl	Wald ratio	1	1.7716	1.42716	0.214477
HMOX2	dlbcl	dlbcl	pqtl	Wald ratio	1	0.792857	1.00893	0.431961
HNMT	dlbcl	dlbcl	pqtl	Wald ratio	1	-0.0263677	0.121704	0.828478
HPGDS	dlbcl	dlbcl	pqtl	Wald ratio	1	-0.0867102	0.223747	0.698359
HPSE	dlbcl	dlbcl	pqtl	Wald ratio	1	-0.379799	0.377415	0.314263
HRC	dlbcl	dlbcl	pqtl	Wald ratio	1	-2.57922	1.21241	0.033391
HRG	dlbcl	dlbcl	pqtl	Wald ratio	1	0.0444924	0.236717	0.850911
HS1BP3	dlbcl	dlbcl	pqtl	Wald ratio	1	-0.438951	0.536384	0.413156
HS3ST3B1	dlbcl	dlbcl	pqtl	Wald ratio	1	-0.240313	0.329375	0.465634
HS6ST1	dlbcl	dlbcl	pqtl	Wald ratio	1	-0.620325	0.488211	0.203868
HS6ST2	dlbcl	dlbcl	pqtl	Wald ratio	1	-0.221359	0.385922	0.566249
HSBP1	dlbcl	dlbcl	pqtl	Wald ratio	1	-0.0998239	0.184331	0.58813
HSD17B14	dlbcl	dlbcl	pqtl	Wald ratio	1	0.136041	0.158414	0.390467
HSDL2	dlbcl	dlbcl	pqtl	Wald ratio	1	0.0673469	0.166837	0.686456
HSPA1A	dlbcl	dlbcl	pqtl	Wald ratio	1	0.806097	1.71544	0.638422
HSPA2	dlbcl	dlbcl	pqtl	Wald ratio	1	0.374603	1.24048	0.762665
HSPB1	dlbcl	dlbcl	pqtl	Wald ratio	1	-0.0572202	0.214621	0.789769
HSPG2	dlbcl	dlbcl	pqtl	Wald ratio	1	0.847929	0.616568	0.169057
HYAL1	dlbcl	dlbcl	pqtl	Wald ratio	1	0.32214	0.376753	0.392527
HYOU1	dlbcl	dlbcl	pqtl	Wald ratio	1	-0.57341	0.622543	0.35701
ICAM3	dlbcl	dlbcl	pqtl	Wald ratio	1	0.00809061	0.3411	0.981077
ICAM4	dlbcl	dlbcl	pqtl	Wald ratio	1	-0.468182	0.914545	0.608701
ICAM5	dlbcl	dlbcl	pqtl	Wald ratio	1	-0.174102	0.144734	0.229011
IDI2	dlbcl	dlbcl	pqtl	Wald ratio	1	-0.720165	0.369091	0.0510348
IDUA	dlbcl	dlbcl	pqtl	Wald ratio	1	0.197701	0.211303	0.349464
IFI30	dlbcl	dlbcl	pqtl	Wald ratio	1	-0.0748996	0.233936	0.748838
IFIT3	dlbcl	dlbcl	pqtl	Wald ratio	1	-0.582906	1.02222	0.568519
IFNAR1	dlbcl	dlbcl	pqtl	Wald ratio	1	-0.272851	0.244118	0.263694
IFNGR1	dlbcl	dlbcl	pqtl	Wald ratio	1	-1.48866	0.598969	0.0129417
IFNGR2	dlbcl	dlbcl	pqtl	Wald ratio	1	0.0318697	0.0898017	0.722672
IFNL1	dlbcl	dlbcl	pqtl	Wald ratio	1	3.23977	2.20455	0.141673
IFNLR1	dlbcl	dlbcl	pqtl	Wald ratio	1	0.213085	0.280638	0.447681
IGBP1	dlbcl	dlbcl	pqtl	Wald ratio	1	1.3	1.25263	0.299356
IGDCC4	dlbcl	dlbcl	pqtl	Wald ratio	1	0.122761	0.649104	0.849996
IGF1R	dlbcl	dlbcl	pqtl	Wald ratio	1	0.281416	1.02655	0.783979
IGF2R	dlbcl	dlbcl	pqtl	Wald ratio	1	-0.0410072	0.273022	0.880609
IGFBP2	dlbcl	dlbcl	pqtl	Wald ratio	1	-2.14394	1.6303	0.188491
IGFBP3	dlbcl	dlbcl	pqtl	Wald ratio	1	-0.0858093	0.227716	0.706303
IGFBP4	dlbcl	dlbcl	pqtl	Wald ratio	1	-3.556	2.086	0.0882508
IGFBP6	dlbcl	dlbcl	pqtl	Wald ratio	1	0.219847	1.03969	0.832533
IGFBP7	dlbcl	dlbcl	pqtl	Wald ratio	1	-0.0493639	0.29313	0.866266
IGFBPL1	dlbcl	dlbcl	pqtl	Wald ratio	1	-0.533121	0.243312	0.0284446
IGLC2	dlbcl	dlbcl	pqtl	Wald ratio	1	0.073991	0.574888	0.897591
IGSF21	dlbcl	dlbcl	pqtl	Wald ratio	1	0.139869	0.710458	0.843928
IGSF3	dlbcl	dlbcl	pqtl	Wald ratio	1	0.79386	1.14211	0.487002
IGSF8	dlbcl	dlbcl	pqtl	Wald ratio	1	0.508	0.734	0.488876
IGSF9	dlbcl	dlbcl	pqtl	Wald ratio	1	0.689027	0.459834	0.134023
IL10	dlbcl	dlbcl	pqtl	Wald ratio	1	-2.87132	0.999265	0.00406033
IL10RA	dlbcl	dlbcl	pqtl	Wald ratio	1	0.052459	0.66776	0.937383
IL10RB	dlbcl	dlbcl	pqtl	Wald ratio	1	-0.249903	0.190485	0.189545
IL12A_IL12B	dlbcl	dlbcl	pqtl	Wald ratio	1	0.137833	0.214068	0.519658
IL12B	dlbcl	dlbcl	pqtl	Wald ratio	1	0.133764	0.207749	0.519658
IL12RB1	dlbcl	dlbcl	pqtl	Wald ratio	1	0.250224	0.269058	0.352371
IL13RA1	dlbcl	dlbcl	pqtl	Wald ratio	1	0.0160539	0.124265	0.897206
IL15RA	dlbcl	dlbcl	pqtl	Wald ratio	1	-0.122619	0.42619	0.773569
IL16	dlbcl	dlbcl	pqtl	Wald ratio	1	0.0901483	0.245339	0.713288
IL17C	dlbcl	dlbcl	pqtl	Wald ratio	1	0.195902	0.807377	0.808285
IL17D	dlbcl	dlbcl	pqtl	Wald ratio	1	0.421096	0.306575	0.169582
IL17RA	dlbcl	dlbcl	pqtl	Wald ratio	1	-0.0430622	0.118062	0.715304
IL17RB	dlbcl	dlbcl	pqtl	Wald ratio	1	-0.10802	0.128571	0.400821
IL18	dlbcl	dlbcl	pqtl	Wald ratio	1	0.332281	0.346316	0.33732
IL18BP	dlbcl	dlbcl	pqtl	Wald ratio	1	0.359429	0.868	0.67881
IL18R1	dlbcl	dlbcl	pqtl	Wald ratio	1	-0.0283648	0.138154	0.837327
IL19	dlbcl	dlbcl	pqtl	Wald ratio	1	0.543175	0.308914	0.0786895
IL1R1	dlbcl	dlbcl	pqtl	Wald ratio	1	0.585405	0.603784	0.332265
IL1R2	dlbcl	dlbcl	pqtl	Wald ratio	1	0.109459	0.189961	0.564467
IL1RAP	dlbcl	dlbcl	pqtl	Wald ratio	1	-0.0976512	0.100641	0.331898
IL1RL1	dlbcl	dlbcl	pqtl	Wald ratio	1	-0.215782	0.153835	0.160711
IL1RL2	dlbcl	dlbcl	pqtl	Wald ratio	1	-0.077619	0.235476	0.741683
IL1RN	dlbcl	dlbcl	pqtl	Wald ratio	1	0.0429907	0.490654	0.930179
IL22RA1	dlbcl	dlbcl	pqtl	Wald ratio	1	-0.598516	0.412166	0.146467
IL2RA	dlbcl	dlbcl	pqtl	Wald ratio	1	-0.0174194	0.208387	0.933381
IL31RA	dlbcl	dlbcl	pqtl	Wald ratio	1	-0.239902	0.173941	0.167829
IL32	dlbcl	dlbcl	pqtl	Wald ratio	1	0.271018	0.597128	0.649923
IL34	dlbcl	dlbcl	pqtl	Wald ratio	1	0.246978	0.145147	0.0888346
IL36G	dlbcl	dlbcl	pqtl	Wald ratio	1	0.337143	1.72381	0.844939
IL4R	dlbcl	dlbcl	pqtl	Wald ratio	1	0.6299	0.341528	0.065131
IL5RA	dlbcl	dlbcl	pqtl	Wald ratio	1	0.2018	0.379	0.594412
IL6R	dlbcl	dlbcl	pqtl	Wald ratio	1	-0.00873162	0.0986213	0.92945
IL6ST	dlbcl	dlbcl	pqtl	Wald ratio	1	0.327547	0.569434	0.565146
IL7R	dlbcl	dlbcl	pqtl	Wald ratio	1	0.0129359	0.117435	0.912288
IMMT	dlbcl	dlbcl	pqtl	Wald ratio	1	-0.00175439	0.867544	0.998386
IMPA1	dlbcl	dlbcl	pqtl	Wald ratio	1	-0.47619	0.478571	0.319724
INHBB	dlbcl	dlbcl	pqtl	Wald ratio	1	0.454085	0.278028	0.10242
INHBC	dlbcl	dlbcl	pqtl	Wald ratio	1	-0.0314504	0.176336	0.858444
INPP5D	dlbcl	dlbcl	pqtl	Wald ratio	1	1.42705	0.669565	0.0330634
INSL3	dlbcl	dlbcl	pqtl	Wald ratio	1	3.33636	3.40303	0.326884
INSL4	dlbcl	dlbcl	pqtl	Wald ratio	1	0.0234399	0.642314	0.970889
INSL5	dlbcl	dlbcl	pqtl	Wald ratio	1	0.467442	0.590116	0.428292
INSR	dlbcl	dlbcl	pqtl	Wald ratio	1	0.70297	1.96238	0.720176
IPCEF1	dlbcl	dlbcl	pqtl	Wald ratio	1	-1.77674	1.17209	0.129551
IQGAP2	dlbcl	dlbcl	pqtl	Wald ratio	1	0.818382	0.728676	0.261392
IRAK4	dlbcl	dlbcl	pqtl	Wald ratio	1	-0.0311005	0.978278	0.974639
ISLR2	dlbcl	dlbcl	pqtl	Wald ratio	1	-0.427004	0.462025	0.355382
ISM1	dlbcl	dlbcl	pqtl	Wald ratio	1	-1.49529	0.568063	0.00848194
IST1	dlbcl	dlbcl	pqtl	Wald ratio	1	0.835521	0.943629	0.375923
ITGA11	dlbcl	dlbcl	pqtl	Wald ratio	1	0.438122	0.473481	0.354799
ITGA2	dlbcl	dlbcl	pqtl	Wald ratio	1	-0.0142615	0.177929	0.936116
ITGA5	dlbcl	dlbcl	pqtl	Wald ratio	1	0.36087	1.625	0.824257
ITGA6	dlbcl	dlbcl	pqtl	Wald ratio	1	0.0134529	0.49417	0.978282
ITGAV	dlbcl	dlbcl	pqtl	Wald ratio	1	0.242308	0.726282	0.738661
ITGB2	dlbcl	dlbcl	pqtl	Wald ratio	1	1.27603	0.840411	0.128929
ITGB5	dlbcl	dlbcl	pqtl	Wald ratio	1	-1.92511	1.45799	0.186705
ITGB6	dlbcl	dlbcl	pqtl	Wald ratio	1	0.0426573	0.36958	0.908111
ITGBL1	dlbcl	dlbcl	pqtl	Wald ratio	1	-0.202452	0.391826	0.605373
ITIH1	dlbcl	dlbcl	pqtl	Wald ratio	1	-0.394118	0.742647	0.595631
ITIH3	dlbcl	dlbcl	pqtl	Wald ratio	1	0.307869	0.328852	0.349175
ITIH4	dlbcl	dlbcl	pqtl	Wald ratio	1	0.0315385	0.387308	0.9351
ITIH5	dlbcl	dlbcl	pqtl	Wald ratio	1	-0.22	0.875152	0.801516
ITPA	dlbcl	dlbcl	pqtl	Wald ratio	1	0.119983	0.171107	0.483168
JAM3	dlbcl	dlbcl	pqtl	Wald ratio	1	1.02124	0.957522	0.286178
JPT2	dlbcl	dlbcl	pqtl	Wald ratio	1	-0.528333	2.47833	0.831186
KAZALD1	dlbcl	dlbcl	pqtl	Wald ratio	1	-0.0517606	0.107394	0.629829
KCTD5	dlbcl	dlbcl	pqtl	Wald ratio	1	0.771084	1.89398	0.683916
KDR	dlbcl	dlbcl	pqtl	Wald ratio	1	0.360347	0.202568	0.0752568
KEL	dlbcl	dlbcl	pqtl	Wald ratio	1	0.356202	0.497703	0.474181
KHK	dlbcl	dlbcl	pqtl	Wald ratio	1	-0.379677	0.238568	0.111501
KIAA0319	dlbcl	dlbcl	pqtl	Wald ratio	1	-0.282653	0.346939	0.415241
KIF1C	dlbcl	dlbcl	pqtl	Wald ratio	1	-2.17476	2.65373	0.412495
KIFBP	dlbcl	dlbcl	pqtl	Wald ratio	1	3.82398	3.28984	0.245088
KIR2DL2	dlbcl	dlbcl	pqtl	Wald ratio	1	0.0452188	0.164506	0.783411
KIRREL2	dlbcl	dlbcl	pqtl	Wald ratio	1	0.350688	0.580275	0.545612
KIT	dlbcl	dlbcl	pqtl	Wald ratio	1	-4.66154	2.13846	0.0292681
KLB	dlbcl	dlbcl	pqtl	Wald ratio	1	0.209103	0.131469	0.111721
KLK1	dlbcl	dlbcl	pqtl	Wald ratio	1	0.0331828	0.114108	0.771203
KLK10	dlbcl	dlbcl	pqtl	Wald ratio	1	-0.103646	0.172569	0.548104
KLK11	dlbcl	dlbcl	pqtl	Wald ratio	1	-0.138595	0.254727	0.586378
KLK12	dlbcl	dlbcl	pqtl	Wald ratio	1	-0.00300687	0.0845361	0.971626
KLK13	dlbcl	dlbcl	pqtl	Wald ratio	1	0.378396	0.228953	0.0983871
KLK14	dlbcl	dlbcl	pqtl	Wald ratio	1	-0.00696517	0.286567	0.980609
KLK15	dlbcl	dlbcl	pqtl	Wald ratio	1	-0.242373	0.130085	0.0624352
KLK3	dlbcl	dlbcl	pqtl	Wald ratio	1	1.734	1.941	0.371668
KLK4	dlbcl	dlbcl	pqtl	Wald ratio	1	0.185427	0.260804	0.477095
KLK6	dlbcl	dlbcl	pqtl	Wald ratio	1	0.286316	0.542632	0.597747
KLK7	dlbcl	dlbcl	pqtl	Wald ratio	1	0.251982	0.23583	0.285298
KLK8	dlbcl	dlbcl	pqtl	Wald ratio	1	-0.560232	0.378958	0.139314
KLKB1	dlbcl	dlbcl	pqtl	Wald ratio	1	-0.353119	0.263993	0.181024
KLRD1	dlbcl	dlbcl	pqtl	Wald ratio	1	0.430695	0.240528	0.073353
KLRF1	dlbcl	dlbcl	pqtl	Wald ratio	1	3.05166	1.43808	0.0338347
KLRK1	dlbcl	dlbcl	pqtl	Wald ratio	1	0.00894942	0.205642	0.965288
KRT18	dlbcl	dlbcl	pqtl	Wald ratio	1	0.00465116	2.35814	0.998426
KRT19	dlbcl	dlbcl	pqtl	Wald ratio	1	-0.364865	0.692568	0.598312
KRT5	dlbcl	dlbcl	pqtl	Wald ratio	1	-1.21828	1.0957	0.266192
KYAT1	dlbcl	dlbcl	pqtl	Wald ratio	1	0.888652	0.829787	0.284196
KYNU	dlbcl	dlbcl	pqtl	Wald ratio	1	0.0527174	0.431341	0.902727
L1CAM	dlbcl	dlbcl	pqtl	Wald ratio	1	-0.718841	0.700725	0.304961
LACTB2	dlbcl	dlbcl	pqtl	Wald ratio	1	0.167772	0.847145	0.843011
LAG3	dlbcl	dlbcl	pqtl	Wald ratio	1	0.266092	0.575287	0.643696
LAIR1	dlbcl	dlbcl	pqtl	Wald ratio	1	0.121875	0.211458	0.564375
LAIR2	dlbcl	dlbcl	pqtl	Wald ratio	1	0.0840758	0.16218	0.604172
LAMA4	dlbcl	dlbcl	pqtl	Wald ratio	1	-0.906962	0.620886	0.144083
LAMB1	dlbcl	dlbcl	pqtl	Wald ratio	1	0.1272	0.15712	0.418186
LAMP2	dlbcl	dlbcl	pqtl	Wald ratio	1	0.00230548	0.235159	0.992178
LAMP3	dlbcl	dlbcl	pqtl	Wald ratio	1	0.162222	0.461778	0.725364
LAP3	dlbcl	dlbcl	pqtl	Wald ratio	1	-1.70244	2.86037	0.551722
LAT	dlbcl	dlbcl	pqtl	Wald ratio	1	1.675	2.35455	0.476843
LATS1	dlbcl	dlbcl	pqtl	Wald ratio	1	0.836667	1.68	0.618473
LAYN	dlbcl	dlbcl	pqtl	Wald ratio	1	-0.103047	0.293075	0.725133
LBP	dlbcl	dlbcl	pqtl	Wald ratio	1	-0.00834753	0.121635	0.945286
LCAT	dlbcl	dlbcl	pqtl	Wald ratio	1	-0.865143	0.819429	0.291065
LCN15	dlbcl	dlbcl	pqtl	Wald ratio	1	-0.214724	0.163957	0.190319
LCP1	dlbcl	dlbcl	pqtl	Wald ratio	1	-0.05349	0.131237	0.68358
LDLR	dlbcl	dlbcl	pqtl	Wald ratio	1	-0.81068	2.00485	0.685949
LDLRAP1	dlbcl	dlbcl	pqtl	Wald ratio	1	-2.01784	1.56162	0.196308
LECT2	dlbcl	dlbcl	pqtl	Wald ratio	1	-0.0509506	0.131052	0.697438
LEFTY2	dlbcl	dlbcl	pqtl	Wald ratio	1	-0.160508	0.141749	0.257492
LEG1	dlbcl	dlbcl	pqtl	Wald ratio	1	0.284932	0.271233	0.293486
LEP	dlbcl	dlbcl	pqtl	Wald ratio	1	1.61111	3.09111	0.602222
LEPR	dlbcl	dlbcl	pqtl	Wald ratio	1	-0.448889	0.564815	0.426757
LGALS1	dlbcl	dlbcl	pqtl	Wald ratio	1	0.296416	0.379211	0.434412
LGALS3	dlbcl	dlbcl	pqtl	Wald ratio	1	-0.0486692	0.186122	0.793714
LGALS3BP	dlbcl	dlbcl	pqtl	Wald ratio	1	-0.215918	1.10735	0.845403
LGALS4	dlbcl	dlbcl	pqtl	Wald ratio	1	-0.0496454	1.13121	0.964994
LGALS7_LGALS7B	dlbcl	dlbcl	pqtl	Wald ratio	1	0.0545455	0.443636	0.902146
LGALS8	dlbcl	dlbcl	pqtl	Wald ratio	1	-0.13754	0.378641	0.71642
LGALS9	dlbcl	dlbcl	pqtl	Wald ratio	1	-0.0941884	0.243888	0.699352
LGMN	dlbcl	dlbcl	pqtl	Wald ratio	1	-0.329382	0.410558	0.422391
LHB	dlbcl	dlbcl	pqtl	Wald ratio	1	-0.198148	1.31204	0.879957
LIFR	dlbcl	dlbcl	pqtl	Wald ratio	1	0.591111	0.495278	0.232676
LILRA2	dlbcl	dlbcl	pqtl	Wald ratio	1	-0.329116	0.158735	0.0381377
LILRA3	dlbcl	dlbcl	pqtl	Wald ratio	1	-0.0897436	0.0885029	0.310574
LILRA6	dlbcl	dlbcl	pqtl	Wald ratio	1	0.0682278	0.126835	0.590629
LILRB1	dlbcl	dlbcl	pqtl	Wald ratio	1	-0.165396	0.16311	0.310574
LILRB2	dlbcl	dlbcl	pqtl	Wald ratio	1	0.0203139	0.0958152	0.832099
LILRB5	dlbcl	dlbcl	pqtl	Wald ratio	1	0.060355	0.0861369	0.483498
LMNB2	dlbcl	dlbcl	pqtl	Wald ratio	1	-1	2.15204	0.642164
LONP1	dlbcl	dlbcl	pqtl	Wald ratio	1	-0.534682	0.608092	0.379251
LPA	dlbcl	dlbcl	pqtl	Wald ratio	1	-0.418144	0.177839	0.0187107
LPCAT2	dlbcl	dlbcl	pqtl	Wald ratio	1	-1.80397	1.20476	0.134298
LPL	dlbcl	dlbcl	pqtl	Wald ratio	1	-0.452918	0.63501	0.475694
LPO	dlbcl	dlbcl	pqtl	Wald ratio	1	0.0913793	0.367241	0.803495
LRCH4	dlbcl	dlbcl	pqtl	Wald ratio	1	1.5027	1.50811	0.319048
LRIG1	dlbcl	dlbcl	pqtl	Wald ratio	1	0.0058548	0.13185	0.964582
LRIG3	dlbcl	dlbcl	pqtl	Wald ratio	1	-0.982609	1.35978	0.469912
LRP1	dlbcl	dlbcl	pqtl	Wald ratio	1	-4.46547	1.88481	0.017827
LRPAP1	dlbcl	dlbcl	pqtl	Wald ratio	1	-0.00344828	0.580218	0.995258
LRRC37A2	dlbcl	dlbcl	pqtl	Wald ratio	1	-0.181926	0.158583	0.251302
LRRC38	dlbcl	dlbcl	pqtl	Wald ratio	1	0.33244	0.318452	0.29652
LRRFIP1	dlbcl	dlbcl	pqtl	Wald ratio	1	-0.301351	1.49595	0.84035
LRRN1	dlbcl	dlbcl	pqtl	Wald ratio	1	-0.0554307	0.126092	0.660224
LRTM2	dlbcl	dlbcl	pqtl	Wald ratio	1	-0.642105	0.440789	0.145195
LSP1	dlbcl	dlbcl	pqtl	Wald ratio	1	0.824658	0.692466	0.233693
LTA	dlbcl	dlbcl	pqtl	Wald ratio	1	-0.0319841	0.14134	0.820975
LTA4H	dlbcl	dlbcl	pqtl	Wald ratio	1	0.41954	1.14828	0.714839
LTB	dlbcl	dlbcl	pqtl	Wald ratio	1	0.085625	0.764375	0.910808
LTBP2	dlbcl	dlbcl	pqtl	Wald ratio	1	3.65243	1.05728	0.000551221
LTBP3	dlbcl	dlbcl	pqtl	Wald ratio	1	-0.144457	0.262077	0.581495
LUZP2	dlbcl	dlbcl	pqtl	Wald ratio	1	1.13752	0.69598	0.102171
LXN	dlbcl	dlbcl	pqtl	Wald ratio	1	-0.212727	0.593333	0.719947
LY6D	dlbcl	dlbcl	pqtl	Wald ratio	1	0.35	0.234332	0.135278
LY75	dlbcl	dlbcl	pqtl	Wald ratio	1	0.0980603	0.109052	0.368541
LY9	dlbcl	dlbcl	pqtl	Wald ratio	1	-0.123737	0.184512	0.502462
LY96	dlbcl	dlbcl	pqtl	Wald ratio	1	-1.62704	1.62755	0.317462
LYAR	dlbcl	dlbcl	pqtl	Wald ratio	1	0.768	2.052	0.708204
LYPD3	dlbcl	dlbcl	pqtl	Wald ratio	1	-0.17243	0.313318	0.582089
LYPD8	dlbcl	dlbcl	pqtl	Wald ratio	1	-0.186513	0.238396	0.434
LYSMD3	dlbcl	dlbcl	pqtl	Wald ratio	1	-1.03462	1.99231	0.603548
LYVE1	dlbcl	dlbcl	pqtl	Wald ratio	1	-0.885714	0.562202	0.115156
LYZL2	dlbcl	dlbcl	pqtl	Wald ratio	1	-0.474502	0.447012	0.288464
LZTFL1	dlbcl	dlbcl	pqtl	Wald ratio	1	-0.361132	0.551321	0.512448
M6PR	dlbcl	dlbcl	pqtl	Wald ratio	1	0.686458	0.531944	0.196888
MAD1L1	dlbcl	dlbcl	pqtl	Wald ratio	1	-0.854153	1.40391	0.542916
MAMDC2	dlbcl	dlbcl	pqtl	Wald ratio	1	0.276056	0.526761	0.600234
MAN1A2	dlbcl	dlbcl	pqtl	Wald ratio	1	0.525128	0.533333	0.324813
MANF	dlbcl	dlbcl	pqtl	Wald ratio	1	-2.27732	1.49588	0.127909
MANSC4	dlbcl	dlbcl	pqtl	Wald ratio	1	-0.210521	0.128905	0.102439
MAP2	dlbcl	dlbcl	pqtl	Wald ratio	1	1.25628	2.95884	0.671139
MAP4K5	dlbcl	dlbcl	pqtl	Wald ratio	1	0.806427	0.770694	0.295393
MAPK9	dlbcl	dlbcl	pqtl	Wald ratio	1	1.30942	0.884783	0.138891
MARCO	dlbcl	dlbcl	pqtl	Wald ratio	1	-0.235494	0.404938	0.560867
MATN2	dlbcl	dlbcl	pqtl	Wald ratio	1	-0.293827	0.244444	0.229356
MATN3	dlbcl	dlbcl	pqtl	Wald ratio	1	0.159854	0.193978	0.409893
MAVS	dlbcl	dlbcl	pqtl	Wald ratio	1	1.0072	1.2408	0.416944
MAX	dlbcl	dlbcl	pqtl	Wald ratio	1	0.473494	1.19518	0.69198
MBL2	dlbcl	dlbcl	pqtl	Wald ratio	1	0.0796685	0.115249	0.489393
MCAM	dlbcl	dlbcl	pqtl	Wald ratio	1	0.357692	0.752244	0.63443
MCEE	dlbcl	dlbcl	pqtl	Wald ratio	1	-0.899457	0.534239	0.0922548
MCEMP1	dlbcl	dlbcl	pqtl	Wald ratio	1	0.0378566	0.405428	0.925606
MCFD2	dlbcl	dlbcl	pqtl	Wald ratio	1	0.0458904	0.738356	0.950442
MDGA1	dlbcl	dlbcl	pqtl	Wald ratio	1	0.100555	0.092329	0.276115
MDH1	dlbcl	dlbcl	pqtl	Wald ratio	1	0.383696	1.26304	0.76129
MDM1	dlbcl	dlbcl	pqtl	Wald ratio	1	0.442857	0.554082	0.424138
MECR	dlbcl	dlbcl	pqtl	Wald ratio	1	0.73271	1.57103	0.640937
MEGF10	dlbcl	dlbcl	pqtl	Wald ratio	1	0.0166253	0.251365	0.947266
MEGF11	dlbcl	dlbcl	pqtl	Wald ratio	1	0.570625	0.794375	0.472553
MEGF9	dlbcl	dlbcl	pqtl	Wald ratio	1	0.710736	0.340491	0.0368531
MELTF	dlbcl	dlbcl	pqtl	Wald ratio	1	0.256683	0.245792	0.296342
MEP1A	dlbcl	dlbcl	pqtl	Wald ratio	1	0.239247	0.544624	0.660452
MEP1B	dlbcl	dlbcl	pqtl	Wald ratio	1	0.0258879	0.0923364	0.779198
MEPE	dlbcl	dlbcl	pqtl	Wald ratio	1	-0.257143	0.736905	0.727127
MERTK	dlbcl	dlbcl	pqtl	Wald ratio	1	0.0980843	0.397318	0.805012
METAP2	dlbcl	dlbcl	pqtl	Wald ratio	1	-0.658182	1.92909	0.732962
MFAP4	dlbcl	dlbcl	pqtl	Wald ratio	1	0.189231	0.510629	0.710948
MFAP5	dlbcl	dlbcl	pqtl	Wald ratio	1	0.348087	0.663096	0.599623
MFGE8	dlbcl	dlbcl	pqtl	Wald ratio	1	0.0723238	0.300783	0.80998
MGMT	dlbcl	dlbcl	pqtl	Wald ratio	1	0.320802	0.250376	0.200095
MIA	dlbcl	dlbcl	pqtl	Wald ratio	1	0.132809	0.112135	0.236267
MICB_MICA	dlbcl	dlbcl	pqtl	Wald ratio	1	0.257573	0.1125	0.0220481
MIF	dlbcl	dlbcl	pqtl	Wald ratio	1	0.182143	0.9125	0.841787
MILR1	dlbcl	dlbcl	pqtl	Wald ratio	1	-0.155959	0.258549	0.546371
MINDY1	dlbcl	dlbcl	pqtl	Wald ratio	1	-0.90675	0.553846	0.101591
MINK1	dlbcl	dlbcl	pqtl	Wald ratio	1	0.34914	0.88088	0.691844
MITD1	dlbcl	dlbcl	pqtl	Wald ratio	1	-0.867123	1.36712	0.525906
MLN	dlbcl	dlbcl	pqtl	Wald ratio	1	0.544307	0.257426	0.0344791
MMP1	dlbcl	dlbcl	pqtl	Wald ratio	1	0.00306346	0.226258	0.989197
MMP10	dlbcl	dlbcl	pqtl	Wald ratio	1	0.331392	0.34481	0.336509
MMP12	dlbcl	dlbcl	pqtl	Wald ratio	1	0.082638	0.172544	0.631982
MMP7	dlbcl	dlbcl	pqtl	Wald ratio	1	0.511091	0.376155	0.174235
MMP8	dlbcl	dlbcl	pqtl	Wald ratio	1	-0.21432	0.288415	0.457423
MMP9	dlbcl	dlbcl	pqtl	Wald ratio	1	-0.677778	0.693056	0.328096
MMUT	dlbcl	dlbcl	pqtl	Wald ratio	1	-1.4697	1.01212	0.146475
MOCS2	dlbcl	dlbcl	pqtl	Wald ratio	1	0.216044	0.222198	0.330899
MPHOSPH8	dlbcl	dlbcl	pqtl	Wald ratio	1	3.53516	2.6967	0.189884
MPI	dlbcl	dlbcl	pqtl	Wald ratio	1	0.230882	0.483824	0.633217
MSR1	dlbcl	dlbcl	pqtl	Wald ratio	1	-0.447977	0.349086	0.199393
MSRA	dlbcl	dlbcl	pqtl	Wald ratio	1	0.217857	2.48214	0.93006
MST1	dlbcl	dlbcl	pqtl	Wald ratio	1	-0.00985646	0.0958852	0.918126
MSTN	dlbcl	dlbcl	pqtl	Wald ratio	1	-0.0664216	0.601103	0.912013
MTHFD2	dlbcl	dlbcl	pqtl	Wald ratio	1	-0.0840121	0.566817	0.882171
MTHFSD	dlbcl	dlbcl	pqtl	Wald ratio	1	0.224573	0.220726	0.308951
MTIF3	dlbcl	dlbcl	pqtl	Wald ratio	1	0.460766	0.92823	0.619618
MTSS1	dlbcl	dlbcl	pqtl	Wald ratio	1	0.36746	2.09048	0.860468
MTUS1	dlbcl	dlbcl	pqtl	Wald ratio	1	-0.810673	0.843619	0.336579
MUC13	dlbcl	dlbcl	pqtl	Wald ratio	1	-0.50625	0.51875	0.329112
MUC16	dlbcl	dlbcl	pqtl	Wald ratio	1	-0.467647	1.475	0.751207
MUC2	dlbcl	dlbcl	pqtl	Wald ratio	1	-0.25438	0.422628	0.547241
MVK	dlbcl	dlbcl	pqtl	Wald ratio	1	1.15784	1.90098	0.542474
MYBPC2	dlbcl	dlbcl	pqtl	Wald ratio	1	-1.31039	2.18182	0.54811
MYDGF	dlbcl	dlbcl	pqtl	Wald ratio	1	1.42993	1.52517	0.348473
MYO9B	dlbcl	dlbcl	pqtl	Wald ratio	1	-1.54545	2.25909	0.493909
MYOC	dlbcl	dlbcl	pqtl	Wald ratio	1	-0.305098	0.390588	0.434729
MYOM3	dlbcl	dlbcl	pqtl	Wald ratio	1	0.711111	1.39192	0.609431
NAA80	dlbcl	dlbcl	pqtl	Wald ratio	1	0.0920056	0.792707	0.907601
NAAA	dlbcl	dlbcl	pqtl	Wald ratio	1	0.215512	0.16747	0.198139
NADK	dlbcl	dlbcl	pqtl	Wald ratio	1	0.0535714	0.390079	0.890766
NAGA	dlbcl	dlbcl	pqtl	Wald ratio	1	0.781575	0.921636	0.396421
NAGK	dlbcl	dlbcl	pqtl	Wald ratio	1	0.420548	0.469406	0.370298
NAGPA	dlbcl	dlbcl	pqtl	Wald ratio	1	-0.0859903	0.336232	0.798146
NAPRT	dlbcl	dlbcl	pqtl	Wald ratio	1	0.0923077	0.304872	0.762061
NBL1	dlbcl	dlbcl	pqtl	Wald ratio	1	0.10614	1.06754	0.920801
NBN	dlbcl	dlbcl	pqtl	Wald ratio	1	-1.96667	1.72255	0.253571
NCAM1	dlbcl	dlbcl	pqtl	Wald ratio	1	-0.372289	0.342169	0.276583
NCAM2	dlbcl	dlbcl	pqtl	Wald ratio	1	-0.103743	0.199465	0.602989
NCAN	dlbcl	dlbcl	pqtl	Wald ratio	1	-0.312868	0.709926	0.659427
NCF2	dlbcl	dlbcl	pqtl	Wald ratio	1	-0.108037	1.0824	0.920494
NCS1	dlbcl	dlbcl	pqtl	Wald ratio	1	-0.364545	0.939091	0.697876
NECTIN2	dlbcl	dlbcl	pqtl	Wald ratio	1	-1.17816	0.571264	0.0391721
NECTIN4	dlbcl	dlbcl	pqtl	Wald ratio	1	0.040411	0.330365	0.902644
NELL1	dlbcl	dlbcl	pqtl	Wald ratio	1	0.449418	0.287581	0.118111
NEO1	dlbcl	dlbcl	pqtl	Wald ratio	1	0.046789	1.33303	0.972
NEXN	dlbcl	dlbcl	pqtl	Wald ratio	1	-0.0447552	0.992308	0.964026
NFATC1	dlbcl	dlbcl	pqtl	Wald ratio	1	0.608491	0.940566	0.51767
NFKB1	dlbcl	dlbcl	pqtl	Wald ratio	1	-0.72605	0.863866	0.400647
NFKBIE	dlbcl	dlbcl	pqtl	Wald ratio	1	-0.390926	0.378072	0.301136
NFU1	dlbcl	dlbcl	pqtl	Wald ratio	1	-0.253374	1.08006	0.814525
NGRN	dlbcl	dlbcl	pqtl	Wald ratio	1	2.32032	1.45435	0.110616
NHLRC3	dlbcl	dlbcl	pqtl	Wald ratio	1	0.481159	0.644984	0.455666
NID1	dlbcl	dlbcl	pqtl	Wald ratio	1	-0.114621	0.436684	0.79295
NID2	dlbcl	dlbcl	pqtl	Wald ratio	1	0.341289	0.171777	0.0469429
NINJ1	dlbcl	dlbcl	pqtl	Wald ratio	1	0.186	0.4144	0.653546
NIT1	dlbcl	dlbcl	pqtl	Wald ratio	1	0.167643	0.770572	0.827775
NME3	dlbcl	dlbcl	pqtl	Wald ratio	1	-0.266329	0.389647	0.494282
NMI	dlbcl	dlbcl	pqtl	Wald ratio	1	-0.217265	0.220179	0.323759
NMNAT1	dlbcl	dlbcl	pqtl	Wald ratio	1	-1.58178	2.29593	0.490856
NOS1	dlbcl	dlbcl	pqtl	Wald ratio	1	0.63	0.89	0.479029
NOS3	dlbcl	dlbcl	pqtl	Wald ratio	1	-2.13125	2.17292	0.326679
NOTCH2	dlbcl	dlbcl	pqtl	Wald ratio	1	-0.3	1.00305	0.764874
NPC2	dlbcl	dlbcl	pqtl	Wald ratio	1	0.142036	0.434526	0.743761
NPHS1	dlbcl	dlbcl	pqtl	Wald ratio	1	0.151285	0.226864	0.504864
NPL	dlbcl	dlbcl	pqtl	Wald ratio	1	-0.877046	0.930605	0.345964
NPPB	dlbcl	dlbcl	pqtl	Wald ratio	1	0.581667	0.566667	0.30467
NPPC	dlbcl	dlbcl	pqtl	Wald ratio	1	0.204255	2.20426	0.92617
NPTX1	dlbcl	dlbcl	pqtl	Wald ratio	1	0.296372	0.235308	0.207847
NPTX2	dlbcl	dlbcl	pqtl	Wald ratio	1	-0.107122	0.313056	0.732215
NPTXR	dlbcl	dlbcl	pqtl	Wald ratio	1	0.142613	0.120854	0.237984
NRP1	dlbcl	dlbcl	pqtl	Wald ratio	1	-0.246711	0.335526	0.46216
NRTN	dlbcl	dlbcl	pqtl	Wald ratio	1	0.655294	1.55176	0.672814
NSFL1C	dlbcl	dlbcl	pqtl	Wald ratio	1	-0.61125	1.3075	0.640146
NT5C	dlbcl	dlbcl	pqtl	Wald ratio	1	0.0548531	0.219732	0.802868
NT5C3A	dlbcl	dlbcl	pqtl	Wald ratio	1	0.917241	0.957759	0.338216
NT5E	dlbcl	dlbcl	pqtl	Wald ratio	1	-0.386757	0.172326	0.0248109
NTF3	dlbcl	dlbcl	pqtl	Wald ratio	1	0.836087	0.787826	0.288573
NTproBNP	dlbcl	dlbcl	pqtl	Wald ratio	1	0.417131	0.406375	0.30467
NTRK2	dlbcl	dlbcl	pqtl	Wald ratio	1	0.5824	1.1952	0.626058
NTRK3	dlbcl	dlbcl	pqtl	Wald ratio	1	-0.576096	0.616733	0.350248
NUB1	dlbcl	dlbcl	pqtl	Wald ratio	1	-0.0879699	0.557143	0.87454
NUCB2	dlbcl	dlbcl	pqtl	Wald ratio	1	-0.313682	0.246269	0.202757
NUDT15	dlbcl	dlbcl	pqtl	Wald ratio	1	-0.103196	0.834247	0.901553
NUDT16	dlbcl	dlbcl	pqtl	Wald ratio	1	-0.439667	0.393583	0.263957
NUDT2	dlbcl	dlbcl	pqtl	Wald ratio	1	0.735435	0.388589	0.0584136
NUDT5	dlbcl	dlbcl	pqtl	Wald ratio	1	1.73214	1.76429	0.326208
NUMB	dlbcl	dlbcl	pqtl	Wald ratio	1	2.32471	1.15529	0.0441968
NXPH3	dlbcl	dlbcl	pqtl	Wald ratio	1	-0.368771	0.640268	0.56464
OBP2B	dlbcl	dlbcl	pqtl	Wald ratio	1	-0.184075	0.151937	0.225696
OCLN	dlbcl	dlbcl	pqtl	Wald ratio	1	0.271946	0.879638	0.757203
ODAM	dlbcl	dlbcl	pqtl	Wald ratio	1	0.421026	0.38	0.267878
OGA	dlbcl	dlbcl	pqtl	Wald ratio	1	-0.4056	0.86	0.637192
OGFR	dlbcl	dlbcl	pqtl	Wald ratio	1	0.5848	0.759429	0.441269
OGN	dlbcl	dlbcl	pqtl	Wald ratio	1	0.224525	0.184801	0.224384
OLFM4	dlbcl	dlbcl	pqtl	Wald ratio	1	-0.0919262	0.123299	0.455935
OMG	dlbcl	dlbcl	pqtl	Wald ratio	1	-1.26562	1.24141	0.307961
OMP	dlbcl	dlbcl	pqtl	Wald ratio	1	-0.279348	0.425815	0.511804
OPHN1	dlbcl	dlbcl	pqtl	Wald ratio	1	-1.06318	0.971967	0.274023
OPLAH	dlbcl	dlbcl	pqtl	Wald ratio	1	1.13481	0.551934	0.0397771
OPTC	dlbcl	dlbcl	pqtl	Wald ratio	1	0.588191	1.00012	0.556449
ORM1	dlbcl	dlbcl	pqtl	Wald ratio	1	0.311789	0.384882	0.417888
OSCAR	dlbcl	dlbcl	pqtl	Wald ratio	1	-0.212795	0.194094	0.272926
OSMR	dlbcl	dlbcl	pqtl	Wald ratio	1	-0.131175	0.210903	0.533961
OSTN	dlbcl	dlbcl	pqtl	Wald ratio	1	0.808	1.261	0.521678
OTOA	dlbcl	dlbcl	pqtl	Wald ratio	1	1.4037	1.81481	0.439245
OTUD7B	dlbcl	dlbcl	pqtl	Wald ratio	1	-4.6566	3.26826	0.154217
OXCT1	dlbcl	dlbcl	pqtl	Wald ratio	1	3.26792	2.07736	0.115692
OXT	dlbcl	dlbcl	pqtl	Wald ratio	1	-0.0463295	0.177162	0.793699
P4HB	dlbcl	dlbcl	pqtl	Wald ratio	1	-0.0873563	1.49885	0.953524
PACS2	dlbcl	dlbcl	pqtl	Wald ratio	1	-0.15625	0.586364	0.789875
PADI2	dlbcl	dlbcl	pqtl	Wald ratio	1	-0.0890625	0.774219	0.908417
PADI4	dlbcl	dlbcl	pqtl	Wald ratio	1	0.328458	0.395257	0.405974
PAEP	dlbcl	dlbcl	pqtl	Wald ratio	1	-0.156617	0.166743	0.347593
PAG1	dlbcl	dlbcl	pqtl	Wald ratio	1	0.151389	1.52083	0.920707
PALM	dlbcl	dlbcl	pqtl	Wald ratio	1	-0.533333	0.778105	0.493075
PALM2	dlbcl	dlbcl	pqtl	Wald ratio	1	-0.370909	0.531364	0.485157
PAM	dlbcl	dlbcl	pqtl	Wald ratio	1	0.140526	0.190571	0.460883
PAMR1	dlbcl	dlbcl	pqtl	Wald ratio	1	0.17027	0.315385	0.589279
PAPPA	dlbcl	dlbcl	pqtl	Wald ratio	1	-1.01196	1.31483	0.441507
PARD3	dlbcl	dlbcl	pqtl	Wald ratio	1	-1.1875	1.73472	0.493629
PARK7	dlbcl	dlbcl	pqtl	Wald ratio	1	0.429612	0.542233	0.428185
PARP1	dlbcl	dlbcl	pqtl	Wald ratio	1	-0.0705128	0.741667	0.924256
PCBD1	dlbcl	dlbcl	pqtl	Wald ratio	1	-0.382258	0.555914	0.491692
PCBP2	dlbcl	dlbcl	pqtl	Wald ratio	1	-2.42083	2.18542	0.267982
PCDH1	dlbcl	dlbcl	pqtl	Wald ratio	1	0.258974	1.26154	0.83735
PCDH12	dlbcl	dlbcl	pqtl	Wald ratio	1	0.118769	0.302462	0.694559
PCDH17	dlbcl	dlbcl	pqtl	Wald ratio	1	0.245797	0.298841	0.410791
PCDH7	dlbcl	dlbcl	pqtl	Wald ratio	1	0.482203	0.928814	0.603649
PCDH9	dlbcl	dlbcl	pqtl	Wald ratio	1	0.0501493	0.414925	0.903799
PCDHB15	dlbcl	dlbcl	pqtl	Wald ratio	1	0.333251	0.27931	0.232822
PCOLCE	dlbcl	dlbcl	pqtl	Wald ratio	1	-0.986982	0.587574	0.0930043
PCSK7	dlbcl	dlbcl	pqtl	Wald ratio	1	-0.216533	0.289067	0.453811
PCSK9	dlbcl	dlbcl	pqtl	Wald ratio	1	-0.164764	0.239429	0.491357
PDCD1LG2	dlbcl	dlbcl	pqtl	Wald ratio	1	0.113793	0.171897	0.50798
PDCD5	dlbcl	dlbcl	pqtl	Wald ratio	1	-0.433777	0.307181	0.157914
PDCD6	dlbcl	dlbcl	pqtl	Wald ratio	1	0.00365206	0.113679	0.974371
PDE5A	dlbcl	dlbcl	pqtl	Wald ratio	1	0.571698	0.644654	0.375171
PDGFA	dlbcl	dlbcl	pqtl	Wald ratio	1	1.85773	2.7189	0.494439
PDGFC	dlbcl	dlbcl	pqtl	Wald ratio	1	-0.466279	1.32093	0.724094
PDGFRA	dlbcl	dlbcl	pqtl	Wald ratio	1	-0.268	0.356941	0.452759
PDIA4	dlbcl	dlbcl	pqtl	Wald ratio	1	-1.62963	1.33796	0.223227
PDIA5	dlbcl	dlbcl	pqtl	Wald ratio	1	-0.00283401	0.408097	0.994459
PDZD2	dlbcl	dlbcl	pqtl	Wald ratio	1	-0.146667	0.403095	0.715969
PEAR1	dlbcl	dlbcl	pqtl	Wald ratio	1	-0.52891	0.480095	0.270602
PEBP1	dlbcl	dlbcl	pqtl	Wald ratio	1	2.17431	1.27113	0.0871662
PECR	dlbcl	dlbcl	pqtl	Wald ratio	1	-0.0290828	0.433781	0.946546
PENK	dlbcl	dlbcl	pqtl	Wald ratio	1	-0.233564	0.34083	0.493168
PEPD	dlbcl	dlbcl	pqtl	Wald ratio	1	0.185774	0.298536	0.533755
PER3	dlbcl	dlbcl	pqtl	Wald ratio	1	0.0865546	0.27563	0.753503
PF4	dlbcl	dlbcl	pqtl	Wald ratio	1	-0.139037	1.4262	0.922339
PFKFB2	dlbcl	dlbcl	pqtl	Wald ratio	1	1.2586	0.52957	0.0174707
PGD	dlbcl	dlbcl	pqtl	Wald ratio	1	-0.245435	0.263804	0.352181
PGLYRP1	dlbcl	dlbcl	pqtl	Wald ratio	1	0.413684	0.410877	0.314016
PGLYRP2	dlbcl	dlbcl	pqtl	Wald ratio	1	-0.087193	0.106404	0.412526
PGLYRP4	dlbcl	dlbcl	pqtl	Wald ratio	1	0.387322	0.35541	0.275805
PHACTR2	dlbcl	dlbcl	pqtl	Wald ratio	1	-0.0658537	0.502439	0.895722
PHLDB1	dlbcl	dlbcl	pqtl	Wald ratio	1	2.59091	2.29773	0.25949
PHYKPL	dlbcl	dlbcl	pqtl	Wald ratio	1	0.234939	0.362408	0.51681
PI16	dlbcl	dlbcl	pqtl	Wald ratio	1	0.746209	0.377725	0.0482077
PI3	dlbcl	dlbcl	pqtl	Wald ratio	1	0.0211594	0.35913	0.953017
PIBF1	dlbcl	dlbcl	pqtl	Wald ratio	1	0.536923	1.59692	0.736702
PIGR	dlbcl	dlbcl	pqtl	Wald ratio	1	0.306358	1.1869	0.796317
PIK3AP1	dlbcl	dlbcl	pqtl	Wald ratio	1	0.536087	0.529565	0.311387
PIK3IP1	dlbcl	dlbcl	pqtl	Wald ratio	1	-0.593333	0.351212	0.0911452
PILRA	dlbcl	dlbcl	pqtl	Wald ratio	1	0.0833504	0.10858	0.442702
PILRB	dlbcl	dlbcl	pqtl	Wald ratio	1	0.0719577	0.093739	0.442702
PINLYP	dlbcl	dlbcl	pqtl	Wald ratio	1	0.107004	0.127497	0.401319
PKD2	dlbcl	dlbcl	pqtl	Wald ratio	1	-0.478169	1.3493	0.723051
PKLR	dlbcl	dlbcl	pqtl	Wald ratio	1	-0.000273224	0.487432	0.999553
PKN3	dlbcl	dlbcl	pqtl	Wald ratio	1	0.389855	0.769082	0.612218
PLA2G15	dlbcl	dlbcl	pqtl	Wald ratio	1	-0.172727	0.441322	0.695512
PLA2G1B	dlbcl	dlbcl	pqtl	Wald ratio	1	-1.9459	1.92459	0.311981
PLA2G2A	dlbcl	dlbcl	pqtl	Wald ratio	1	0.103606	0.153675	0.500192
PLA2G4A	dlbcl	dlbcl	pqtl	Wald ratio	1	1.8856	1.6696	0.258741
PLA2G7	dlbcl	dlbcl	pqtl	Wald ratio	1	0.796085	1.36171	0.558801
PLAT	dlbcl	dlbcl	pqtl	Wald ratio	1	-0.63165	1.85724	0.73378
PLAU	dlbcl	dlbcl	pqtl	Wald ratio	1	0.440801	0.733792	0.548029
PLAUR	dlbcl	dlbcl	pqtl	Wald ratio	1	0.143195	0.934911	0.878269
PLB1	dlbcl	dlbcl	pqtl	Wald ratio	1	-0.0298886	0.108308	0.78258
PLCB2	dlbcl	dlbcl	pqtl	Wald ratio	1	0.530921	0.789474	0.501265
PLEKHO1	dlbcl	dlbcl	pqtl	Wald ratio	1	0.454545	2.12727	0.8308
PLG	dlbcl	dlbcl	pqtl	Wald ratio	1	0.481478	0.71729	0.502064
PLIN3	dlbcl	dlbcl	pqtl	Wald ratio	1	1.29167	1.19762	0.280798
PLSCR3	dlbcl	dlbcl	pqtl	Wald ratio	1	1.46701	1.13247	0.195181
PLTP	dlbcl	dlbcl	pqtl	Wald ratio	1	0.161277	0.255888	0.528521
PLXDC1	dlbcl	dlbcl	pqtl	Wald ratio	1	-0.016221	0.605169	0.978616
PLXDC2	dlbcl	dlbcl	pqtl	Wald ratio	1	-0.782051	1.49744	0.601489
PLXNA4	dlbcl	dlbcl	pqtl	Wald ratio	1	-0.295098	1.11961	0.792109
PLXNB2	dlbcl	dlbcl	pqtl	Wald ratio	1	-0.103409	0.140625	0.462124
PLXNB3	dlbcl	dlbcl	pqtl	Wald ratio	1	-0.466038	0.65283	0.475306
PM20D1	dlbcl	dlbcl	pqtl	Wald ratio	1	0.085122	0.128902	0.509023
PMM2	dlbcl	dlbcl	pqtl	Wald ratio	1	-0.156454	0.354277	0.658768
PMS1	dlbcl	dlbcl	pqtl	Wald ratio	1	-1.7625	2.17679	0.418124
PNLIPRP2	dlbcl	dlbcl	pqtl	Wald ratio	1	0.166284	0.0899382	0.0644764
PODXL	dlbcl	dlbcl	pqtl	Wald ratio	1	0.528108	0.421261	0.209974
POF1B	dlbcl	dlbcl	pqtl	Wald ratio	1	-0.7536	0.82	0.358083
POMC	dlbcl	dlbcl	pqtl	Wald ratio	1	-0.488971	1.32794	0.712711
PON1	dlbcl	dlbcl	pqtl	Wald ratio	1	0.0135318	0.138566	0.922205
PON3	dlbcl	dlbcl	pqtl	Wald ratio	1	0.0863992	0.388748	0.824119
POSTN	dlbcl	dlbcl	pqtl	Wald ratio	1	-0.779918	0.404508	0.0538471
PPCDC	dlbcl	dlbcl	pqtl	Wald ratio	1	-0.024575	0.25255	0.922482
PPIE	dlbcl	dlbcl	pqtl	Wald ratio	1	1.61176	1.99412	0.418941
PPL	dlbcl	dlbcl	pqtl	Wald ratio	1	0.410294	1.21691	0.735996
PPM1F	dlbcl	dlbcl	pqtl	Wald ratio	1	-2.95152	1.64848	0.073383
PPME1	dlbcl	dlbcl	pqtl	Wald ratio	1	1.13265	2.67449	0.671929
PPP1R14A	dlbcl	dlbcl	pqtl	Wald ratio	1	0.262443	0.458824	0.567327
PPP1R14D	dlbcl	dlbcl	pqtl	Wald ratio	1	-1.7375	1.76964	0.32618
PPP2R5A	dlbcl	dlbcl	pqtl	Wald ratio	1	2.12157	1.39641	0.128685
PRAP1	dlbcl	dlbcl	pqtl	Wald ratio	1	-0.00230769	0.397923	0.995373
PRDX1	dlbcl	dlbcl	pqtl	Wald ratio	1	2.6402	1.97451	0.181177
PRDX5	dlbcl	dlbcl	pqtl	Wald ratio	1	-0.620615	0.654051	0.342682
PRDX6	dlbcl	dlbcl	pqtl	Wald ratio	1	-0.789941	0.825444	0.338573
PRELP	dlbcl	dlbcl	pqtl	Wald ratio	1	-0.836303	0.310505	0.00707354
PRG2	dlbcl	dlbcl	pqtl	Wald ratio	1	-0.932	1.228	0.447878
PRKAR2A	dlbcl	dlbcl	pqtl	Wald ratio	1	-3.775	1.59499	0.0179429
PRKG1	dlbcl	dlbcl	pqtl	Wald ratio	1	0.523832	0.540187	0.332184
PRND	dlbcl	dlbcl	pqtl	Wald ratio	1	-0.00831025	0.378393	0.982478
PROC	dlbcl	dlbcl	pqtl	Wald ratio	1	0.43057	0.531088	0.41752
PROCR	dlbcl	dlbcl	pqtl	Wald ratio	1	0.0518934	0.203787	0.798997
PROK1	dlbcl	dlbcl	pqtl	Wald ratio	1	-0.33286	0.28215	0.238109
PROS1	dlbcl	dlbcl	pqtl	Wald ratio	1	1.08633	1.81602	0.549713
PRR4	dlbcl	dlbcl	pqtl	Wald ratio	1	-0.0309987	0.130869	0.812759
PRRT3	dlbcl	dlbcl	pqtl	Wald ratio	1	-0.481043	0.618009	0.436348
PRSS2	dlbcl	dlbcl	pqtl	Wald ratio	1	0.825547	0.732117	0.259482
PRSS22	dlbcl	dlbcl	pqtl	Wald ratio	1	-0.157661	0.444758	0.722973
PRSS27	dlbcl	dlbcl	pqtl	Wald ratio	1	0.172507	0.42372	0.683916
PRSS53	dlbcl	dlbcl	pqtl	Wald ratio	1	0.0438679	0.117807	0.709616
PRSS8	dlbcl	dlbcl	pqtl	Wald ratio	1	0.178571	0.930357	0.84779
PRTFDC1	dlbcl	dlbcl	pqtl	Wald ratio	1	0.3773	0.338829	0.265476
PRTG	dlbcl	dlbcl	pqtl	Wald ratio	1	-0.134642	0.238337	0.572126
PRTN3	dlbcl	dlbcl	pqtl	Wald ratio	1	-0.0317907	0.236821	0.893213
PSAP	dlbcl	dlbcl	pqtl	Wald ratio	1	0.0963351	0.514136	0.851368
PSAPL1	dlbcl	dlbcl	pqtl	Wald ratio	1	-0.000810373	0.206159	0.996864
PSCA	dlbcl	dlbcl	pqtl	Wald ratio	1	0.0238177	0.0840929	0.777
PSG1	dlbcl	dlbcl	pqtl	Wald ratio	1	-0.176923	0.131913	0.179851
PSME1	dlbcl	dlbcl	pqtl	Wald ratio	1	2.289	1.071	0.0325773
PSME2	dlbcl	dlbcl	pqtl	Wald ratio	1	2.06216	0.964865	0.0325773
PSMG3	dlbcl	dlbcl	pqtl	Wald ratio	1	3.97739	5.37703	0.459483
PSMG4	dlbcl	dlbcl	pqtl	Wald ratio	1	0.507263	0.790503	0.521071
PSRC1	dlbcl	dlbcl	pqtl	Wald ratio	1	-0.605313	0.593597	0.307853
PTGES2	dlbcl	dlbcl	pqtl	Wald ratio	1	1.10851	1.71915	0.519056
PTGR1	dlbcl	dlbcl	pqtl	Wald ratio	1	0.617483	0.371921	0.0968629
PTPRB	dlbcl	dlbcl	pqtl	Wald ratio	1	0.118079	0.328531	0.719284
PTPRF	dlbcl	dlbcl	pqtl	Wald ratio	1	1.32766	1.34894	0.325004
PTPRH	dlbcl	dlbcl	pqtl	Wald ratio	1	0.195893	0.165705	0.237133
PTPRK	dlbcl	dlbcl	pqtl	Wald ratio	1	0.843333	1.33083	0.526284
PTPRM	dlbcl	dlbcl	pqtl	Wald ratio	1	2.02289	1.26627	0.110148
PTPRN2	dlbcl	dlbcl	pqtl	Wald ratio	1	-0.515584	0.674675	0.44475
PTPRR	dlbcl	dlbcl	pqtl	Wald ratio	1	0.89861	1.37489	0.513379
PTPRS	dlbcl	dlbcl	pqtl	Wald ratio	1	0.16585	0.266616	0.533905
PVALB	dlbcl	dlbcl	pqtl	Wald ratio	1	0.171324	0.146936	0.243626
PVR	dlbcl	dlbcl	pqtl	Wald ratio	1	-0.150319	0.149808	0.315663
PXDNL	dlbcl	dlbcl	pqtl	Wald ratio	1	-0.201159	0.406377	0.620595
PXN	dlbcl	dlbcl	pqtl	Wald ratio	1	-0.0244473	0.150715	0.871141
PYDC1	dlbcl	dlbcl	pqtl	Wald ratio	1	-0.149007	0.334437	0.655926
PZP	dlbcl	dlbcl	pqtl	Wald ratio	1	-0.0859756	0.318598	0.787271
QPCT	dlbcl	dlbcl	pqtl	Wald ratio	1	-0.114765	0.113118	0.310314
QSOX1	dlbcl	dlbcl	pqtl	Wald ratio	1	0.194424	0.170632	0.254522
RAB11FIP3	dlbcl	dlbcl	pqtl	Wald ratio	1	0.615484	1.74323	0.724035
RAB2B	dlbcl	dlbcl	pqtl	Wald ratio	1	-0.361739	0.696522	0.603516
RAB33A	dlbcl	dlbcl	pqtl	Wald ratio	1	-1.00485	0.788788	0.202694
RABEPK	dlbcl	dlbcl	pqtl	Wald ratio	1	-0.626923	0.720192	0.384031
RABGAP1L	dlbcl	dlbcl	pqtl	Wald ratio	1	-0.885484	1.59194	0.578053
RAD23B	dlbcl	dlbcl	pqtl	Wald ratio	1	-0.149123	1.72807	0.931232
RALB	dlbcl	dlbcl	pqtl	Wald ratio	1	0.75042	0.844538	0.374241
RANBP1	dlbcl	dlbcl	pqtl	Wald ratio	1	-0.0696721	1.72377	0.96776
RARRES1	dlbcl	dlbcl	pqtl	Wald ratio	1	-0.0583893	0.219016	0.789778
RARRES2	dlbcl	dlbcl	pqtl	Wald ratio	1	1.03318	0.510599	0.0430252
RASSF2	dlbcl	dlbcl	pqtl	Wald ratio	1	1.27732	1.08041	0.237106
RBKS	dlbcl	dlbcl	pqtl	Wald ratio	1	0.263408	0.29095	0.365286
RBM17	dlbcl	dlbcl	pqtl	Wald ratio	1	0.444809	0.55765	0.425075
RBP1	dlbcl	dlbcl	pqtl	Wald ratio	1	-0.459504	1.03223	0.656207
RBP2	dlbcl	dlbcl	pqtl	Wald ratio	1	1.74928	1.5058	0.24536
RBP5	dlbcl	dlbcl	pqtl	Wald ratio	1	-0.473948	0.441082	0.282593
RBP7	dlbcl	dlbcl	pqtl	Wald ratio	1	-0.0431973	0.378231	0.909072
RBPMS2	dlbcl	dlbcl	pqtl	Wald ratio	1	0.376786	1.47619	0.798536
REEP4	dlbcl	dlbcl	pqtl	Wald ratio	1	0.0638191	0.48325	0.894935
REG1A	dlbcl	dlbcl	pqtl	Wald ratio	1	0.370902	0.411885	0.367856
REG1B	dlbcl	dlbcl	pqtl	Wald ratio	1	0.267751	0.297337	0.367856
REG3A	dlbcl	dlbcl	pqtl	Wald ratio	1	0.266919	0.676515	0.693175
REG4	dlbcl	dlbcl	pqtl	Wald ratio	1	-1.16552	0.550082	0.0341069
RELT	dlbcl	dlbcl	pqtl	Wald ratio	1	-0.0861789	0.295122	0.770278
REN	dlbcl	dlbcl	pqtl	Wald ratio	1	-0.392814	0.375689	0.295753
RET	dlbcl	dlbcl	pqtl	Wald ratio	1	0.0189011	0.303297	0.950309
RETN	dlbcl	dlbcl	pqtl	Wald ratio	1	-0.180469	0.636222	0.776673
RGMA	dlbcl	dlbcl	pqtl	Wald ratio	1	-0.142152	0.443498	0.74857
RGMB	dlbcl	dlbcl	pqtl	Wald ratio	1	0.489474	0.574854	0.394506
RIDA	dlbcl	dlbcl	pqtl	Wald ratio	1	-0.13619	0.332381	0.681995
RILPL2	dlbcl	dlbcl	pqtl	Wald ratio	1	-2.13377	1.94693	0.273093
RLN2	dlbcl	dlbcl	pqtl	Wald ratio	1	0.599371	0.78239	0.44363
RNASE1	dlbcl	dlbcl	pqtl	Wald ratio	1	-0.46699	0.53835	0.385697
RNASE10	dlbcl	dlbcl	pqtl	Wald ratio	1	0.16859	0.127436	0.185856
RNASE3	dlbcl	dlbcl	pqtl	Wald ratio	1	-0.893761	0.514128	0.0821402
RNASE4	dlbcl	dlbcl	pqtl	Wald ratio	1	-0.448355	0.343421	0.191704
RNASE6	dlbcl	dlbcl	pqtl	Wald ratio	1	0.0442623	0.266745	0.868208
RNASEH2A	dlbcl	dlbcl	pqtl	Wald ratio	1	0.729252	1.02313	0.475991
RNASET2	dlbcl	dlbcl	pqtl	Wald ratio	1	0.506682	0.25167	0.0440858
RNF149	dlbcl	dlbcl	pqtl	Wald ratio	1	-0.35947	0.37197	0.333847
RNF43	dlbcl	dlbcl	pqtl	Wald ratio	1	2.00537	0.908725	0.0273284
ROBO1	dlbcl	dlbcl	pqtl	Wald ratio	1	0.0554622	0.478992	0.907819
ROBO2	dlbcl	dlbcl	pqtl	Wald ratio	1	-2.40404	0.99899	0.0161075
ROBO4	dlbcl	dlbcl	pqtl	Wald ratio	1	1.67523	1.06881	0.117025
ROR1	dlbcl	dlbcl	pqtl	Wald ratio	1	-0.745125	0.302228	0.0136846
RP2	dlbcl	dlbcl	pqtl	Wald ratio	1	0.628201	0.43689	0.150465
RPA2	dlbcl	dlbcl	pqtl	Wald ratio	1	-0.46381	1.10238	0.673949
RPE	dlbcl	dlbcl	pqtl	Wald ratio	1	0.835185	1.86852	0.654892
RPL14	dlbcl	dlbcl	pqtl	Wald ratio	1	-2.28519	1.67111	0.17148
RRM2	dlbcl	dlbcl	pqtl	Wald ratio	1	-1.89091	1.86182	0.309808
RRM2B	dlbcl	dlbcl	pqtl	Wald ratio	1	-0.0878173	1.0264	0.931817
RSPO1	dlbcl	dlbcl	pqtl	Wald ratio	1	-0.0025641	0.65641	0.996883
RSPO3	dlbcl	dlbcl	pqtl	Wald ratio	1	0.990789	0.646711	0.125511
RTBDN	dlbcl	dlbcl	pqtl	Wald ratio	1	1.42647	0.612353	0.0198331
RTN4IP1	dlbcl	dlbcl	pqtl	Wald ratio	1	2.37812	1.05208	0.0237967
RTN4R	dlbcl	dlbcl	pqtl	Wald ratio	1	-0.807904	0.39622	0.0414472
RWDD1	dlbcl	dlbcl	pqtl	Wald ratio	1	-1.5315	1.69194	0.365373
S100A11	dlbcl	dlbcl	pqtl	Wald ratio	1	0.0670968	0.729355	0.926702
S100A12	dlbcl	dlbcl	pqtl	Wald ratio	1	-0.591064	0.482128	0.220218
S100A13	dlbcl	dlbcl	pqtl	Wald ratio	1	0.37384	0.745781	0.616179
S100A4	dlbcl	dlbcl	pqtl	Wald ratio	1	0.907775	0.656836	0.166959
S100G	dlbcl	dlbcl	pqtl	Wald ratio	1	1.588	0.591333	0.00724308
SAMD9L	dlbcl	dlbcl	pqtl	Wald ratio	1	-0.324105	0.464218	0.485068
SARG	dlbcl	dlbcl	pqtl	Wald ratio	1	-0.279747	1.56456	0.858093
SAT2	dlbcl	dlbcl	pqtl	Wald ratio	1	0.0920898	0.211621	0.663444
SCAMP3	dlbcl	dlbcl	pqtl	Wald ratio	1	-0.73125	1.38375	0.597183
SCARA5	dlbcl	dlbcl	pqtl	Wald ratio	1	0.0813456	0.331498	0.806156
SCARB2	dlbcl	dlbcl	pqtl	Wald ratio	1	0.693226	0.461613	0.133162
SCARF1	dlbcl	dlbcl	pqtl	Wald ratio	1	0.565879	0.267192	0.0341854
SCARF2	dlbcl	dlbcl	pqtl	Wald ratio	1	-0.0256966	0.364706	0.943829
SCG3	dlbcl	dlbcl	pqtl	Wald ratio	1	0.128714	0.198	0.515646
SCGB1A1	dlbcl	dlbcl	pqtl	Wald ratio	1	0.0416667	0.308631	0.892608
SCGB3A1	dlbcl	dlbcl	pqtl	Wald ratio	1	-0.152033	0.843089	0.856895
SCGB3A2	dlbcl	dlbcl	pqtl	Wald ratio	1	-0.333469	0.515102	0.517383
SCGN	dlbcl	dlbcl	pqtl	Wald ratio	1	-1.82111	1.34444	0.175562
SCLY	dlbcl	dlbcl	pqtl	Wald ratio	1	-0.651244	0.591045	0.270526
SCN4B	dlbcl	dlbcl	pqtl	Wald ratio	1	0.114897	0.158003	0.467115
SCP2	dlbcl	dlbcl	pqtl	Wald ratio	1	4.08542	2.11042	0.052888
SCRN1	dlbcl	dlbcl	pqtl	Wald ratio	1	-0.919838	1.21579	0.449303
SCT	dlbcl	dlbcl	pqtl	Wald ratio	1	3.28012	4.20843	0.435735
SDC1	dlbcl	dlbcl	pqtl	Wald ratio	1	0.767176	0.752672	0.308075
SDC4	dlbcl	dlbcl	pqtl	Wald ratio	1	0.335398	0.436726	0.442497
SDCCAG8	dlbcl	dlbcl	pqtl	Wald ratio	1	-0.246	0.493	0.617789
SDHB	dlbcl	dlbcl	pqtl	Wald ratio	1	3.00667	1.75	0.0857792
SDK2	dlbcl	dlbcl	pqtl	Wald ratio	1	-0.168731	0.21284	0.427917
SEC31A	dlbcl	dlbcl	pqtl	Wald ratio	1	0.180189	0.938994	0.847824
SEL1L	dlbcl	dlbcl	pqtl	Wald ratio	1	-0.143092	0.339885	0.673754
SELE	dlbcl	dlbcl	pqtl	Wald ratio	1	0.161856	1.07423	0.880235
SELENOP	dlbcl	dlbcl	pqtl	Wald ratio	1	0.43964	0.978378	0.653175
SELL	dlbcl	dlbcl	pqtl	Wald ratio	1	-0.381081	0.275676	0.166863
SELP	dlbcl	dlbcl	pqtl	Wald ratio	1	-0.541404	0.366586	0.139707
SEMA3F	dlbcl	dlbcl	pqtl	Wald ratio	1	0.357711	1.01592	0.724759
SEMA4D	dlbcl	dlbcl	pqtl	Wald ratio	1	-2.00761	1.18478	0.0901712
SEMA6C	dlbcl	dlbcl	pqtl	Wald ratio	1	-0.341176	1.10588	0.757694
SEMA7A	dlbcl	dlbcl	pqtl	Wald ratio	1	1.13333	0.828947	0.171564
SEPTIN8	dlbcl	dlbcl	pqtl	Wald ratio	1	-1.21905	0.75102	0.104549
SEPTIN9	dlbcl	dlbcl	pqtl	Wald ratio	1	3.63716	5.67432	0.521532
SERPINA1	dlbcl	dlbcl	pqtl	Wald ratio	1	0.356873	1.38437	0.79657
SERPINA11	dlbcl	dlbcl	pqtl	Wald ratio	1	0.13984	0.1568	0.37248
SERPINA12	dlbcl	dlbcl	pqtl	Wald ratio	1	-0.0799202	0.160239	0.617952
SERPINA3	dlbcl	dlbcl	pqtl	Wald ratio	1	0.214157	0.309888	0.489515
SERPINA4	dlbcl	dlbcl	pqtl	Wald ratio	1	-0.251797	0.180229	0.162384
SERPINA5	dlbcl	dlbcl	pqtl	Wald ratio	1	0.192965	0.496985	0.697816
SERPINA7	dlbcl	dlbcl	pqtl	Wald ratio	1	-0.0819231	0.265	0.757212
SERPINA9	dlbcl	dlbcl	pqtl	Wald ratio	1	-0.0183838	0.249899	0.941356
SERPINB1	dlbcl	dlbcl	pqtl	Wald ratio	1	-0.736364	1.13182	0.515303
SERPINB5	dlbcl	dlbcl	pqtl	Wald ratio	1	0.161667	1.70333	0.924385
SERPINB6	dlbcl	dlbcl	pqtl	Wald ratio	1	-0.214465	0.619497	0.729198
SERPINB8	dlbcl	dlbcl	pqtl	Wald ratio	1	-0.0213205	0.141265	0.880035
SERPINB9	dlbcl	dlbcl	pqtl	Wald ratio	1	-0.0388298	1.12181	0.972388
SERPINC1	dlbcl	dlbcl	pqtl	Wald ratio	1	-0.0285544	1.22186	0.981356
SERPIND1	dlbcl	dlbcl	pqtl	Wald ratio	1	1.33445	1.36171	0.327096
SERPINE1	dlbcl	dlbcl	pqtl	Wald ratio	1	0.978899	1.17339	0.404143
SERPINE2	dlbcl	dlbcl	pqtl	Wald ratio	1	-0.0338095	0.196508	0.863397
SERPINF1	dlbcl	dlbcl	pqtl	Wald ratio	1	-0.163251	0.35053	0.641412
SERPINF2	dlbcl	dlbcl	pqtl	Wald ratio	1	0.00798122	0.588263	0.989175
SERPING1	dlbcl	dlbcl	pqtl	Wald ratio	1	0.641648	0.501373	0.200622
SERPINH1	dlbcl	dlbcl	pqtl	Wald ratio	1	-0.464615	0.755385	0.538508
SERPINI1	dlbcl	dlbcl	pqtl	Wald ratio	1	0.423128	0.257709	0.100615
SERPINI2	dlbcl	dlbcl	pqtl	Wald ratio	1	-0.214228	0.343687	0.533072
SETMAR	dlbcl	dlbcl	pqtl	Wald ratio	1	-0.368203	0.451613	0.414897
SEZ6	dlbcl	dlbcl	pqtl	Wald ratio	1	3.2907	1.72907	0.0570196
SEZ6L	dlbcl	dlbcl	pqtl	Wald ratio	1	-0.175	0.481115	0.716053
SF3B4	dlbcl	dlbcl	pqtl	Wald ratio	1	-1.6	2.34348	0.494767
SFRP1	dlbcl	dlbcl	pqtl	Wald ratio	1	0.697872	0.524468	0.183311
SFRP4	dlbcl	dlbcl	pqtl	Wald ratio	1	-1.05286	0.518214	0.0421838
SFTPA1	dlbcl	dlbcl	pqtl	Wald ratio	1	0.0678832	0.434672	0.875898
SFTPA2	dlbcl	dlbcl	pqtl	Wald ratio	1	-0.0270241	0.154158	0.860843
SFTPD	dlbcl	dlbcl	pqtl	Wald ratio	1	-0.0723179	0.13298	0.586562
SGSH	dlbcl	dlbcl	pqtl	Wald ratio	1	0.255806	0.116122	0.0276009
SH2B3	dlbcl	dlbcl	pqtl	Wald ratio	1	-4.20732	1.5	0.00503356
SH2D1A	dlbcl	dlbcl	pqtl	Wald ratio	1	-0.23913	0.329249	0.467661
SH3BP1	dlbcl	dlbcl	pqtl	Wald ratio	1	-0.194306	0.472598	0.680967
SH3GLB2	dlbcl	dlbcl	pqtl	Wald ratio	1	0.168421	0.378947	0.656721
SHBG	dlbcl	dlbcl	pqtl	Wald ratio	1	-0.0422794	0.370588	0.909169
SHH	dlbcl	dlbcl	pqtl	Wald ratio	1	-1.19273	1.79455	0.506281
SHISA5	dlbcl	dlbcl	pqtl	Wald ratio	1	-1.15148	1.19072	0.333522
SHMT1	dlbcl	dlbcl	pqtl	Wald ratio	1	-0.11348	0.142091	0.424496
SHPK	dlbcl	dlbcl	pqtl	Wald ratio	1	-0.770588	1.51261	0.610441
SIAE	dlbcl	dlbcl	pqtl	Wald ratio	1	0.796037	0.478788	0.0963906
SIGLEC10	dlbcl	dlbcl	pqtl	Wald ratio	1	-0.00724638	0.251318	0.976997
SIGLEC5	dlbcl	dlbcl	pqtl	Wald ratio	1	-0.0142857	0.114542	0.900745
SIGLEC6	dlbcl	dlbcl	pqtl	Wald ratio	1	-0.0875706	0.305141	0.774125
SIGLEC7	dlbcl	dlbcl	pqtl	Wald ratio	1	-0.112298	0.319417	0.72516
SIGLEC8	dlbcl	dlbcl	pqtl	Wald ratio	1	0.0610769	0.217231	0.778587
SIGLEC9	dlbcl	dlbcl	pqtl	Wald ratio	1	0.221239	0.177168	0.211756
SIL1	dlbcl	dlbcl	pqtl	Wald ratio	1	-0.23	1.69333	0.891958
SIRPA	dlbcl	dlbcl	pqtl	Wald ratio	1	-0.010859	0.082658	0.895481
SIRPB1	dlbcl	dlbcl	pqtl	Wald ratio	1	0.0633475	0.13072	0.627958
SIRT2	dlbcl	dlbcl	pqtl	Wald ratio	1	-0.91404	0.751289	0.223746
SKAP1	dlbcl	dlbcl	pqtl	Wald ratio	1	3.20962	2.04423	0.116395
SLA2	dlbcl	dlbcl	pqtl	Wald ratio	1	-1.13659	1.33672	0.39517
SLAMF1	dlbcl	dlbcl	pqtl	Wald ratio	1	-0.605155	1.27732	0.635665
SLAMF6	dlbcl	dlbcl	pqtl	Wald ratio	1	0.25534	0.598058	0.669417
SLAMF7	dlbcl	dlbcl	pqtl	Wald ratio	1	-0.0462446	0.169206	0.78462
SLAMF8	dlbcl	dlbcl	pqtl	Wald ratio	1	0.217023	0.111791	0.0522181
SLC27A4	dlbcl	dlbcl	pqtl	Wald ratio	1	4.55495	17.3286	0.79266
SLC39A5	dlbcl	dlbcl	pqtl	Wald ratio	1	0.363755	0.641921	0.570941
SLC4A1	dlbcl	dlbcl	pqtl	Wald ratio	1	-0.90274	2.99247	0.762903
SLC9A3R2	dlbcl	dlbcl	pqtl	Wald ratio	1	0.893478	0.914493	0.328559
SLIT2	dlbcl	dlbcl	pqtl	Wald ratio	1	-0.144643	1.88214	0.938743
SLITRK1	dlbcl	dlbcl	pqtl	Wald ratio	1	-1.03885	0.928025	0.26296
SLITRK2	dlbcl	dlbcl	pqtl	Wald ratio	1	0.28125	0.941667	0.76519
SLITRK6	dlbcl	dlbcl	pqtl	Wald ratio	1	0.0800283	0.277408	0.772975
SLMAP	dlbcl	dlbcl	pqtl	Wald ratio	1	0.105556	1.49583	0.943743
SLURP1	dlbcl	dlbcl	pqtl	Wald ratio	1	0.311168	0.251269	0.215574
SMOC1	dlbcl	dlbcl	pqtl	Wald ratio	1	0.647765	0.504469	0.199123
SMOC2	dlbcl	dlbcl	pqtl	Wald ratio	1	0.0283854	0.276042	0.918098
SMPD1	dlbcl	dlbcl	pqtl	Wald ratio	1	0.0468822	0.276905	0.865555
SMPDL3A	dlbcl	dlbcl	pqtl	Wald ratio	1	0.115355	0.124295	0.353372
SNAP25	dlbcl	dlbcl	pqtl	Wald ratio	1	0.702703	0.912613	0.441306
SNCA	dlbcl	dlbcl	pqtl	Wald ratio	1	-0.375862	2.32874	0.871777
SNCG	dlbcl	dlbcl	pqtl	Wald ratio	1	0.15616	0.116523	0.180192
SNED1	dlbcl	dlbcl	pqtl	Wald ratio	1	-0.128448	0.849138	0.879763
SNX15	dlbcl	dlbcl	pqtl	Wald ratio	1	-0.505799	0.278737	0.069584
SNX9	dlbcl	dlbcl	pqtl	Wald ratio	1	0.815476	1.25952	0.517342
SOD1	dlbcl	dlbcl	pqtl	Wald ratio	1	0.152479	0.452051	0.735888
SOD2	dlbcl	dlbcl	pqtl	Wald ratio	1	-0.561783	0.66051	0.39503
SOD3	dlbcl	dlbcl	pqtl	Wald ratio	1	-0.214241	0.16992	0.207368
SORBS1	dlbcl	dlbcl	pqtl	Wald ratio	1	-2.47412	2.09882	0.238473
SORCS2	dlbcl	dlbcl	pqtl	Wald ratio	1	0.320047	0.238443	0.17952
SORT1	dlbcl	dlbcl	pqtl	Wald ratio	1	0.0141304	0.647283	0.982583
SOST	dlbcl	dlbcl	pqtl	Wald ratio	1	0.862887	1.5732	0.583354
SPAG1	dlbcl	dlbcl	pqtl	Wald ratio	1	-0.157746	0.140704	0.262236
SPARCL1	dlbcl	dlbcl	pqtl	Wald ratio	1	-0.0527817	0.143652	0.7133
SPESP1	dlbcl	dlbcl	pqtl	Wald ratio	1	0.153387	0.358776	0.668995
SPINK1	dlbcl	dlbcl	pqtl	Wald ratio	1	-0.211628	0.276744	0.444447
SPINK2	dlbcl	dlbcl	pqtl	Wald ratio	1	-0.256502	0.306054	0.401977
SPINK4	dlbcl	dlbcl	pqtl	Wald ratio	1	-0.0864455	0.132417	0.513868
SPINK5	dlbcl	dlbcl	pqtl	Wald ratio	1	0.0121065	0.246973	0.960904
SPINK6	dlbcl	dlbcl	pqtl	Wald ratio	1	0.0870423	0.27831	0.754468
SPINK8	dlbcl	dlbcl	pqtl	Wald ratio	1	0.423326	0.260907	0.104693
SPINT1	dlbcl	dlbcl	pqtl	Wald ratio	1	0.216947	0.485191	0.654776
SPINT2	dlbcl	dlbcl	pqtl	Wald ratio	1	0.341176	0.596471	0.567327
SPINT3	dlbcl	dlbcl	pqtl	Wald ratio	1	1.38163	1.00408	0.168817
SPOCK1	dlbcl	dlbcl	pqtl	Wald ratio	1	-0.338931	0.784733	0.665809
SPON1	dlbcl	dlbcl	pqtl	Wald ratio	1	0.0777778	0.344792	0.821529
SPON2	dlbcl	dlbcl	pqtl	Wald ratio	1	-0.423208	0.530034	0.424607
SPRED2	dlbcl	dlbcl	pqtl	Wald ratio	1	-0.733333	1.62381	0.651548
SPRR3	dlbcl	dlbcl	pqtl	Wald ratio	1	0.0137339	0.418455	0.973818
SPRY2	dlbcl	dlbcl	pqtl	Wald ratio	1	-1.4	1.22619	0.253559
SPTLC1	dlbcl	dlbcl	pqtl	Wald ratio	1	0.0626998	0.591474	0.915578
SRPX	dlbcl	dlbcl	pqtl	Wald ratio	1	-0.0643071	0.162612	0.692501
SSC4D	dlbcl	dlbcl	pqtl	Wald ratio	1	-0.130769	0.346581	0.705942
SSC5D	dlbcl	dlbcl	pqtl	Wald ratio	1	-0.0732075	0.207547	0.724293
ST3GAL1	dlbcl	dlbcl	pqtl	Wald ratio	1	0.303965	0.442291	0.491925
ST6GAL1	dlbcl	dlbcl	pqtl	Wald ratio	1	-0.534706	0.63	0.396026
ST8SIA1	dlbcl	dlbcl	pqtl	Wald ratio	1	3.03373	2.3241	0.191777
STAB2	dlbcl	dlbcl	pqtl	Wald ratio	1	0.183333	0.245293	0.454818
STAT2	dlbcl	dlbcl	pqtl	Wald ratio	1	0.0195876	0.446735	0.965027
STX16	dlbcl	dlbcl	pqtl	Wald ratio	1	2.71818	1.82909	0.137257
STX7	dlbcl	dlbcl	pqtl	Wald ratio	1	0.0766323	0.169244	0.650699
STXBP1	dlbcl	dlbcl	pqtl	Wald ratio	1	-3.59649	1.87018	0.0544704
SUGP1	dlbcl	dlbcl	pqtl	Wald ratio	1	0.135802	0.500617	0.786183
SULT2A1	dlbcl	dlbcl	pqtl	Wald ratio	1	0.362259	0.380165	0.340641
SUMF2	dlbcl	dlbcl	pqtl	Wald ratio	1	-0.383707	0.315303	0.223625
SUOX	dlbcl	dlbcl	pqtl	Wald ratio	1	2.42039	4.99879	0.628247
SUSD1	dlbcl	dlbcl	pqtl	Wald ratio	1	0.78593	0.964706	0.415253
SUSD2	dlbcl	dlbcl	pqtl	Wald ratio	1	0.131323	0.156114	0.400235
SUSD4	dlbcl	dlbcl	pqtl	Wald ratio	1	0.0909574	0.265957	0.732351
SV2A	dlbcl	dlbcl	pqtl	Wald ratio	1	-0.487889	0.743945	0.511944
SWAP70	dlbcl	dlbcl	pqtl	Wald ratio	1	0.210738	0.757383	0.780824
SYAP1	dlbcl	dlbcl	pqtl	Wald ratio	1	1.08036	1.52679	0.479192
SYTL4	dlbcl	dlbcl	pqtl	Wald ratio	1	-0.213475	0.660284	0.746462
TACSTD2	dlbcl	dlbcl	pqtl	Wald ratio	1	-0.0334826	0.161702	0.83596
TAFA5	dlbcl	dlbcl	pqtl	Wald ratio	1	0.0282486	0.602825	0.962625
TALDO1	dlbcl	dlbcl	pqtl	Wald ratio	1	-0.976371	0.984877	0.321508
TARBP2	dlbcl	dlbcl	pqtl	Wald ratio	1	-2.58222	2.33111	0.267982
TBC1D17	dlbcl	dlbcl	pqtl	Wald ratio	1	-0.172152	0.255443	0.500353
TBC1D23	dlbcl	dlbcl	pqtl	Wald ratio	1	-0.497368	0.646711	0.441849
TBCA	dlbcl	dlbcl	pqtl	Wald ratio	1	0.547857	0.771429	0.477589
TBCB	dlbcl	dlbcl	pqtl	Wald ratio	1	-0.898473	1.96641	0.647736
TBCC	dlbcl	dlbcl	pqtl	Wald ratio	1	-0.714286	0.56437	0.205644
TCL1A	dlbcl	dlbcl	pqtl	Wald ratio	1	-0.259302	0.33561	0.439742
TCN1	dlbcl	dlbcl	pqtl	Wald ratio	1	-0.179545	0.212968	0.399193
TCN2	dlbcl	dlbcl	pqtl	Wald ratio	1	-0.189727	0.201284	0.345894
TCOF1	dlbcl	dlbcl	pqtl	Wald ratio	1	-2.51142	1.99944	0.209093
TCTN3	dlbcl	dlbcl	pqtl	Wald ratio	1	-0.0888189	0.166929	0.594674
TDP1	dlbcl	dlbcl	pqtl	Wald ratio	1	0.532576	1.18258	0.652456
TDRKH	dlbcl	dlbcl	pqtl	Wald ratio	1	-0.164013	0.313057	0.600344
TEK	dlbcl	dlbcl	pqtl	Wald ratio	1	-0.0942197	0.270809	0.727901
TEX101	dlbcl	dlbcl	pqtl	Wald ratio	1	-0.133721	0.432849	0.757373
TF	dlbcl	dlbcl	pqtl	Wald ratio	1	-0.0984802	0.3231	0.76052
TFF1	dlbcl	dlbcl	pqtl	Wald ratio	1	-0.391638	0.439373	0.372738
TFF2	dlbcl	dlbcl	pqtl	Wald ratio	1	0.594167	0.8675	0.493395
TFF3	dlbcl	dlbcl	pqtl	Wald ratio	1	-0.070746	0.878709	0.935831
TFPI	dlbcl	dlbcl	pqtl	Wald ratio	1	-0.862286	0.302857	0.00441098
TFPI2	dlbcl	dlbcl	pqtl	Wald ratio	1	0.0748936	0.768936	0.92241
TFRC	dlbcl	dlbcl	pqtl	Wald ratio	1	-0.142941	0.191961	0.456491
TG	dlbcl	dlbcl	pqtl	Wald ratio	1	-0.23691	1.41545	0.867076
TGFA	dlbcl	dlbcl	pqtl	Wald ratio	1	-0.376404	0.888764	0.67192
TGFB1	dlbcl	dlbcl	pqtl	Wald ratio	1	-0.149481	0.414187	0.718173
TGFB2	dlbcl	dlbcl	pqtl	Wald ratio	1	-0.863547	0.685714	0.207908
TGFBI	dlbcl	dlbcl	pqtl	Wald ratio	1	0.108044	0.180256	0.548912
TGFBR2	dlbcl	dlbcl	pqtl	Wald ratio	1	-0.172857	2.17429	0.936634
TGFBR3	dlbcl	dlbcl	pqtl	Wald ratio	1	-0.379487	0.697863	0.58659
TGM2	dlbcl	dlbcl	pqtl	Wald ratio	1	-1.50655	0.589286	0.0105711
TGOLN2	dlbcl	dlbcl	pqtl	Wald ratio	1	0.18561	0.142587	0.193008
THBD	dlbcl	dlbcl	pqtl	Wald ratio	1	-0.401508	0.552764	0.467616
THBS2	dlbcl	dlbcl	pqtl	Wald ratio	1	-0.264632	0.224883	0.239292
THBS4	dlbcl	dlbcl	pqtl	Wald ratio	1	0.814667	0.464889	0.0797068
THPO	dlbcl	dlbcl	pqtl	Wald ratio	1	-1.94275	2.27899	0.393956
THSD1	dlbcl	dlbcl	pqtl	Wald ratio	1	0.926816	0.523498	0.0766555
THTPA	dlbcl	dlbcl	pqtl	Wald ratio	1	0.0169761	0.224801	0.939804
THY1	dlbcl	dlbcl	pqtl	Wald ratio	1	-0.176514	0.296925	0.552194
TIE1	dlbcl	dlbcl	pqtl	Wald ratio	1	-0.766667	0.532821	0.150184
TIGAR	dlbcl	dlbcl	pqtl	Wald ratio	1	-0.0442623	1.77049	0.980055
TIGIT	dlbcl	dlbcl	pqtl	Wald ratio	1	-2.35851	1.22021	0.0532524
TIMD4	dlbcl	dlbcl	pqtl	Wald ratio	1	-0.252212	0.461947	0.585082
TIMM10	dlbcl	dlbcl	pqtl	Wald ratio	1	0.399531	0.59108	0.499083
TIMP1	dlbcl	dlbcl	pqtl	Wald ratio	1	-1.01168	1.49895	0.499725
TIMP2	dlbcl	dlbcl	pqtl	Wald ratio	1	-0.513483	1.11348	0.644691
TIMP3	dlbcl	dlbcl	pqtl	Wald ratio	1	0.229294	0.169632	0.176466
TIMP4	dlbcl	dlbcl	pqtl	Wald ratio	1	0.0995402	0.305747	0.744754
TINAGL1	dlbcl	dlbcl	pqtl	Wald ratio	1	0.409756	1.28293	0.74943
TJAP1	dlbcl	dlbcl	pqtl	Wald ratio	1	3.20267	3.56439	0.368909
TK1	dlbcl	dlbcl	pqtl	Wald ratio	1	0.451376	0.802446	0.573775
TLR1	dlbcl	dlbcl	pqtl	Wald ratio	1	-0.205455	0.273333	0.452254
TLR3	dlbcl	dlbcl	pqtl	Wald ratio	1	-0.120537	0.0913345	0.186924
TLR4	dlbcl	dlbcl	pqtl	Wald ratio	1	0.24713	0.491843	0.615346
TMED8	dlbcl	dlbcl	pqtl	Wald ratio	1	0.537681	1.43623	0.70813
TMEM106A	dlbcl	dlbcl	pqtl	Wald ratio	1	0.507767	0.980583	0.604583
TMEM132A	dlbcl	dlbcl	pqtl	Wald ratio	1	0.0106908	0.164803	0.948277
TMEM25	dlbcl	dlbcl	pqtl	Wald ratio	1	-0.941692	0.376318	0.0123362
TMPRSS11D	dlbcl	dlbcl	pqtl	Wald ratio	1	0.572271	0.784661	0.465804
TMPRSS15	dlbcl	dlbcl	pqtl	Wald ratio	1	-1.82797	1.07203	0.0881686
TMPRSS5	dlbcl	dlbcl	pqtl	Wald ratio	1	-0.0729834	0.129449	0.572891
TNC	dlbcl	dlbcl	pqtl	Wald ratio	1	-0.235409	0.429572	0.583687
TNFAIP2	dlbcl	dlbcl	pqtl	Wald ratio	1	-0.779275	0.937306	0.405749
TNFAIP8	dlbcl	dlbcl	pqtl	Wald ratio	1	2.02783	1.28435	0.114364
TNFAIP8L2	dlbcl	dlbcl	pqtl	Wald ratio	1	-0.876563	1.78594	0.623558
TNFRSF10A	dlbcl	dlbcl	pqtl	Wald ratio	1	0.451188	0.212311	0.033576
TNFRSF10B	dlbcl	dlbcl	pqtl	Wald ratio	1	0.152762	0.37181	0.681175
TNFRSF11A	dlbcl	dlbcl	pqtl	Wald ratio	1	0.094359	0.257949	0.71451
TNFRSF12A	dlbcl	dlbcl	pqtl	Wald ratio	1	-1.77483	1.63469	0.2776
TNFRSF13B	dlbcl	dlbcl	pqtl	Wald ratio	1	-0.646386	0.983735	0.511134
TNFRSF14	dlbcl	dlbcl	pqtl	Wald ratio	1	-1.67434	0.869027	0.0540195
TNFRSF17	dlbcl	dlbcl	pqtl	Wald ratio	1	0.134783	0.746377	0.856695
TNFRSF19	dlbcl	dlbcl	pqtl	Wald ratio	1	-0.742017	0.438235	0.0904188
TNFRSF1A	dlbcl	dlbcl	pqtl	Wald ratio	1	-3.81479	1.71866	0.0264441
TNFRSF1B	dlbcl	dlbcl	pqtl	Wald ratio	1	-1.3767	1.03115	0.18184
TNFRSF4	dlbcl	dlbcl	pqtl	Wald ratio	1	-1.07396	1.1125	0.334367
TNFRSF6B	dlbcl	dlbcl	pqtl	Wald ratio	1	0.815667	0.368667	0.0269337
TNFRSF8	dlbcl	dlbcl	pqtl	Wald ratio	1	-0.394595	0.675676	0.55922
TNFSF10	dlbcl	dlbcl	pqtl	Wald ratio	1	0.118336	0.470321	0.801344
TNFSF11	dlbcl	dlbcl	pqtl	Wald ratio	1	1.14474	0.884211	0.195443
TNFSF12	dlbcl	dlbcl	pqtl	Wald ratio	1	-0.0594667	0.301867	0.84383
TNFSF13	dlbcl	dlbcl	pqtl	Wald ratio	1	0.0670927	0.363898	0.853721
TNFSF13B	dlbcl	dlbcl	pqtl	Wald ratio	1	0.274308	0.749934	0.714532
TNFSF14	dlbcl	dlbcl	pqtl	Wald ratio	1	0.328649	0.378018	0.384629
TNFSF8	dlbcl	dlbcl	pqtl	Wald ratio	1	0.469027	0.440708	0.287212
TNIP1	dlbcl	dlbcl	pqtl	Wald ratio	1	2.88333	2.41667	0.232829
TNR	dlbcl	dlbcl	pqtl	Wald ratio	1	0.264658	0.269589	0.326244
TNXB	dlbcl	dlbcl	pqtl	Wald ratio	1	-0.272226	0.481864	0.572113
TOP2B	dlbcl	dlbcl	pqtl	Wald ratio	1	2.56842	1.27684	0.0442683
TOR1AIP1	dlbcl	dlbcl	pqtl	Wald ratio	1	-0.0244444	0.137083	0.858473
TP53	dlbcl	dlbcl	pqtl	Wald ratio	1	0.998437	1.74063	0.566233
TP53I3	dlbcl	dlbcl	pqtl	Wald ratio	1	-0.274368	0.205902	0.182691
TPK1	dlbcl	dlbcl	pqtl	Wald ratio	1	0.070997	0.313293	0.820723
TPMT	dlbcl	dlbcl	pqtl	Wald ratio	1	0.264525	0.259548	0.308119
TPPP3	dlbcl	dlbcl	pqtl	Wald ratio	1	-1.51983	1.22645	0.215265
TPR	dlbcl	dlbcl	pqtl	Wald ratio	1	-0.303063	1.44289	0.833637
TRDMT1	dlbcl	dlbcl	pqtl	Wald ratio	1	-1.23286	0.705	0.0803371
TREH	dlbcl	dlbcl	pqtl	Wald ratio	1	-0.145528	0.120183	0.225942
TREM2	dlbcl	dlbcl	pqtl	Wald ratio	1	0.0697387	0.37923	0.854095
TREML2	dlbcl	dlbcl	pqtl	Wald ratio	1	0.57309	0.396346	0.148196
TRIM25	dlbcl	dlbcl	pqtl	Wald ratio	1	0.536082	1.14021	0.638239
TRIM40	dlbcl	dlbcl	pqtl	Wald ratio	1	-0.197407	0.413333	0.632936
TRIM5	dlbcl	dlbcl	pqtl	Wald ratio	1	0.849876	0.378908	0.0248994
TRIM58	dlbcl	dlbcl	pqtl	Wald ratio	1	0.281223	0.521397	0.589636
TSC22D1	dlbcl	dlbcl	pqtl	Wald ratio	1	-0.786567	2.25075	0.726737
TSPAN15	dlbcl	dlbcl	pqtl	Wald ratio	1	1.25254	1.68983	0.458558
TSPAN8	dlbcl	dlbcl	pqtl	Wald ratio	1	0.133056	0.212058	0.530364
TSPYL1	dlbcl	dlbcl	pqtl	Wald ratio	1	0.566042	0.690398	0.412286
TST	dlbcl	dlbcl	pqtl	Wald ratio	1	1.38416	1.18713	0.243626
TTF2	dlbcl	dlbcl	pqtl	Wald ratio	1	-0.0792553	0.250399	0.751611
TTR	dlbcl	dlbcl	pqtl	Wald ratio	1	1.24132	0.808264	0.124591
TWF2	dlbcl	dlbcl	pqtl	Wald ratio	1	0.110937	1.53438	0.942362
TXNDC15	dlbcl	dlbcl	pqtl	Wald ratio	1	0.279412	0.106488	0.00869336
TXNDC5	dlbcl	dlbcl	pqtl	Wald ratio	1	-0.896622	0.926351	0.333091
TXNDC9	dlbcl	dlbcl	pqtl	Wald ratio	1	3.118	1.98	0.115315
TXNRD1	dlbcl	dlbcl	pqtl	Wald ratio	1	-0.503648	0.7466	0.499937
TYMP	dlbcl	dlbcl	pqtl	Wald ratio	1	-1.31909	0.573636	0.0214752
TYRO3	dlbcl	dlbcl	pqtl	Wald ratio	1	0.189474	0.164241	0.248652
TYRP1	dlbcl	dlbcl	pqtl	Wald ratio	1	-0.336364	1.35584	0.804069
UBE2L6	dlbcl	dlbcl	pqtl	Wald ratio	1	-0.152157	0.425098	0.720393
UBXN1	dlbcl	dlbcl	pqtl	Wald ratio	1	-0.546827	1.43448	0.703053
ULBP2	dlbcl	dlbcl	pqtl	Wald ratio	1	0.337342	0.203165	0.0968267
UMOD	dlbcl	dlbcl	pqtl	Wald ratio	1	-0.0858044	0.124185	0.489603
UPB1	dlbcl	dlbcl	pqtl	Wald ratio	1	1.14336	1.35417	0.398488
UROD	dlbcl	dlbcl	pqtl	Wald ratio	1	0.279541	0.235908	0.236035
UROS	dlbcl	dlbcl	pqtl	Wald ratio	1	-1.63185	1.00222	0.103475
USP28	dlbcl	dlbcl	pqtl	Wald ratio	1	-0.356944	1.5125	0.813436
USP8	dlbcl	dlbcl	pqtl	Wald ratio	1	-1.2266	1.72872	0.47799
UXS1	dlbcl	dlbcl	pqtl	Wald ratio	1	0.592857	0.705495	0.400716
VAMP8	dlbcl	dlbcl	pqtl	Wald ratio	1	-0.854762	0.642857	0.18364
VASH1	dlbcl	dlbcl	pqtl	Wald ratio	1	1.23442	0.762326	0.105387
VASN	dlbcl	dlbcl	pqtl	Wald ratio	1	0.275335	0.245424	0.261916
VAT1	dlbcl	dlbcl	pqtl	Wald ratio	1	0.36069	0.696552	0.604583
VAV3	dlbcl	dlbcl	pqtl	Wald ratio	1	1.83889	1.93519	0.341991
VCAM1	dlbcl	dlbcl	pqtl	Wald ratio	1	1.02255	1.15686	0.376751
VCAN	dlbcl	dlbcl	pqtl	Wald ratio	1	-0.23746	0.155714	0.127265
VCPKMT	dlbcl	dlbcl	pqtl	Wald ratio	1	-7.64035	3.25739	0.0189995
VEGFA	dlbcl	dlbcl	pqtl	Wald ratio	1	0.0127407	0.145926	0.930425
VEGFB	dlbcl	dlbcl	pqtl	Wald ratio	1	-0.472881	0.939831	0.614855
VEGFD	dlbcl	dlbcl	pqtl	Wald ratio	1	-0.0158389	0.148725	0.915187
VGF	dlbcl	dlbcl	pqtl	Wald ratio	1	1.55739	1.44174	0.280046
VIT	dlbcl	dlbcl	pqtl	Wald ratio	1	-0.179419	0.240194	0.455078
VMO1	dlbcl	dlbcl	pqtl	Wald ratio	1	-0.10929	0.135929	0.421385
VNN2	dlbcl	dlbcl	pqtl	Wald ratio	1	-0.00607345	0.146045	0.966829
VPS4B	dlbcl	dlbcl	pqtl	Wald ratio	1	0.788079	2.42252	0.744943
VSIG10	dlbcl	dlbcl	pqtl	Wald ratio	1	0.139142	0.141482	0.325383
VSIG10L	dlbcl	dlbcl	pqtl	Wald ratio	1	-0.270616	0.466825	0.56212
VSIG2	dlbcl	dlbcl	pqtl	Wald ratio	1	-0.213527	0.529469	0.686739
VSIG4	dlbcl	dlbcl	pqtl	Wald ratio	1	-0.00817236	0.305126	0.978632
VSIR	dlbcl	dlbcl	pqtl	Wald ratio	1	-0.257336	0.323476	0.426303
VSNL1	dlbcl	dlbcl	pqtl	Wald ratio	1	-0.0819936	0.31865	0.796935
VSTM1	dlbcl	dlbcl	pqtl	Wald ratio	1	-0.114888	0.129513	0.375036
VSTM2L	dlbcl	dlbcl	pqtl	Wald ratio	1	0.403497	0.938462	0.667228
VTI1A	dlbcl	dlbcl	pqtl	Wald ratio	1	-1.51778	2.05	0.45907
VWA1	dlbcl	dlbcl	pqtl	Wald ratio	1	-0.676975	0.362115	0.0615532
VWC2L	dlbcl	dlbcl	pqtl	Wald ratio	1	2.77353	1.09314	0.0111737
VWF	dlbcl	dlbcl	pqtl	Wald ratio	1	1.9383	1.11915	0.0832844
WARS	dlbcl	dlbcl	pqtl	Wald ratio	1	0.551293	0.527586	0.296053
WASF1	dlbcl	dlbcl	pqtl	Wald ratio	1	-0.0839721	0.342857	0.806519
WASHC3	dlbcl	dlbcl	pqtl	Wald ratio	1	0.0370787	1.19438	0.975234
WFDC1	dlbcl	dlbcl	pqtl	Wald ratio	1	-0.503499	0.319242	0.114757
WFDC12	dlbcl	dlbcl	pqtl	Wald ratio	1	-0.0407494	0.229977	0.85936
WFDC2	dlbcl	dlbcl	pqtl	Wald ratio	1	-0.185039	1.21181	0.878638
WFIKKN1	dlbcl	dlbcl	pqtl	Wald ratio	1	0.600733	0.402198	0.135274
WIF1	dlbcl	dlbcl	pqtl	Wald ratio	1	-1.83187	0.549451	0.000856067
WNT9A	dlbcl	dlbcl	pqtl	Wald ratio	1	0.847967	0.812195	0.296465
WWP2	dlbcl	dlbcl	pqtl	Wald ratio	1	0.172165	0.637113	0.786986
XCL1	dlbcl	dlbcl	pqtl	Wald ratio	1	0.221014	0.141184	0.11748
XG	dlbcl	dlbcl	pqtl	Wald ratio	1	0.185401	0.976642	0.849438
XPNPEP2	dlbcl	dlbcl	pqtl	Wald ratio	1	-0.101324	0.114561	0.376451
XRCC4	dlbcl	dlbcl	pqtl	Wald ratio	1	2.02268	1.30412	0.120905
YES1	dlbcl	dlbcl	pqtl	Wald ratio	1	0.438372	1.3093	0.737766
YJU2	dlbcl	dlbcl	pqtl	Wald ratio	1	-1.5082	1.80656	0.403805
YOD1	dlbcl	dlbcl	pqtl	Wald ratio	1	2.24352	0.914815	0.0141895
ZBP1	dlbcl	dlbcl	pqtl	Wald ratio	1	0.0770492	0.404809	0.849047
ZBTB16	dlbcl	dlbcl	pqtl	Wald ratio	1	-0.544066	0.341481	0.111103
ZBTB17	dlbcl	dlbcl	pqtl	Wald ratio	1	4.02727	2.225	0.0702942
ZFYVE19	dlbcl	dlbcl	pqtl	Wald ratio	1	0.17	0.265946	0.522675
ZP3	dlbcl	dlbcl	pqtl	Wald ratio	1	-0.0116216	0.0924324	0.899945
ZPR1	dlbcl	dlbcl	pqtl	Wald ratio	1	-0.0654545	1.80727	0.971109
