# Supplementary material
Source: Research Square preprint supplement (doi:10.21203/rs.3.rs-9402213/v1)
Supplement: Supplementary file 2 [file 58d20ebcac0c5b534a1eacd1.xlsx]

## Sheet: Demographic characteristics
Field ID	Description
53	Date of attending assessment centre
21022	Age at recruitment
33	Date of birth
52	Month of birth
34	Year of birth
31	Sex
21000	Ethnic background

## Sheet: Proteomics
Olink
A1BG;Alpha-1B-glycoprotein
AAMDC;Mth938 domain-containing protein
AARSD1;Alanyl-tRNA editing protein Aarsd1
ABCA2;ATP-binding cassette sub-family A member 2
ABHD14B;Protein ABHD14B
ABL1;Tyrosine-protein kinase ABL1
ABO;Histo-blood group ABO system transferase
ABRAXAS2;BRISC complex subunit Abraxas 2
ACAA1;3-ketoacyl-CoA thiolase, peroxisomal
ACADM;Medium-chain specific acyl-CoA dehydrogenase, mitochondrial
ACADSB;Short/branched chain specific acyl-CoA dehydrogenase, mitochondrial
ACAN;Aggrecan core protein
ACE;Angiotensin-converting enzyme
ACE2;Angiotensin-converting enzyme 2
ACHE;Acetylcholinesterase
ACOT13;Acyl-coenzyme A thioesterase 13
ACOX1;Peroxisomal acyl-coenzyme A oxidase 1
ACP1;Low molecular weight phosphotyrosine protein phosphatase
ACP5;Tartrate-resistant acid phosphatase type 5
ACP6;Lysophosphatidic acid phosphatase type 6
ACRBP;Acrosin-binding protein
ACRV1;Acrosomal protein SP-10
ACSL1;Long-chain-fatty-acid--CoA ligase 1
ACTA2;Actin, aortic smooth muscle
ACTN2;Alpha-actinin-2
ACTN4;Alpha-actinin-4
ACVRL1;Serine/threonine-protein kinase receptor R3
ACY1;Aminoacylase-1
ACY3;N-acyl-aromatic-L-amino acid amidohydrolase
ACYP1;Acylphosphatase-1
ADA;Adenosine deaminase
ADA2;Adenosine deaminase 2
ADAM12;Disintegrin and metalloproteinase domain-containing protein 12
ADAM15;Disintegrin and metalloproteinase domain-containing protein 15
ADAM22;Disintegrin and metalloproteinase domain-containing protein 22
ADAM23;Disintegrin and metalloproteinase domain-containing protein 23
ADAM8;Disintegrin and metalloproteinase domain-containing protein 8
ADAM9;Disintegrin and metalloproteinase domain-containing protein 9
ADAMTS1;A disintegrin and metalloproteinase with thrombospondin motifs 1
ADAMTS13;A disintegrin and metalloproteinase with thrombospondin motifs 13
ADAMTS15;A disintegrin and metalloproteinase with thrombospondin motifs 15
ADAMTS16;A disintegrin and metalloproteinase with thrombospondin motifs 16
ADAMTS4;A disintegrin and metalloproteinase with thrombospondin motifs 4
ADAMTS8;A disintegrin and metalloproteinase with thrombospondin motifs 8
ADAMTSL2;ADAMTS-like protein 2
ADAMTSL4;ADAMTS-like protein 4
ADAMTSL5;ADAMTS-like protein 5
ADCYAP1R1;Pituitary adenylate cyclase-activating polypeptide type I receptor
ADD1;Alpha-adducin
ADGRB3;Adhesion G protein-coupled receptor B3
ADGRD1;Adhesion G-protein coupled receptor D1
ADGRE1;Adhesion G protein-coupled receptor E1
ADGRE2;Adhesion G protein-coupled receptor E2
ADGRE5;Adhesion G protein-coupled receptor E5
ADGRF5;Adhesion G protein-coupled receptor F5
ADGRG1;Adhesion G-protein coupled receptor G1
ADGRG2;Adhesion G-protein coupled receptor G2
ADGRV1;Adhesion G-protein coupled receptor V1
ADH1B;All-trans-retinol dehydrogenase
ADH4;All-trans-retinol dehydrogenase [NAD(+)] ADH4
ADIPOQ;Adiponectin
ADM;Pro-adrenomedullin
ADRA2A;Alpha-2A adrenergic receptor
AFAP1;Actin filament-associated protein 1
AFM;Afamin
AFP;Alpha-fetoprotein
AGBL2;Cytosolic carboxypeptidase 2
AGER;Advanced glycosylation end product-specific receptor
AGR2;Anterior gradient protein 2 homolog
AGR3;Anterior gradient protein 3
AGRN;Agrin
AGRP;Agouti-related protein
AGT;Angiotensinogen
AGXT;Serine--pyruvate aminotransferase
AHCY;Adenosylhomocysteinase
AHNAK;Neuroblast differentiation-associated protein AHNAK
AHNAK2;Protein AHNAK2
AHSA1;Activator of 90 kDa heat shock protein ATPase homolog 1
AHSG;Alpha-2-HS-glycoprotein
AHSP;Alpha-hemoglobin-stabilizing protein
AIDA;Axin interactor, dorsalization-associated protein
AIF1;Allograft inflammatory factor 1
AIF1L;Allograft inflammatory factor 1-like
AIFM1;Apoptosis-inducing factor 1, mitochondrial
AK1;Adenylate kinase isoenzyme 1
AK2;Adenylate kinase 2, mitochondrial
AKAP12;A-kinase anchor protein 12
AKR1B1;Aldo-keto reductase family 1 member B1
AKR1B10;Aldo-keto reductase family 1 member B10
AKR1C4;Aldo-keto reductase family 1 member C4
AKR7L;Aflatoxin B1 aldehyde reductase member 4
AKT1S1;Proline-rich AKT1 substrate 1
AKT2;RAC-beta serine/threonine-protein kinase
AKT3;RAC-gamma serine/threonine-protein kinase
ALCAM;CD166 antigen
ALDH1A1;Retinal dehydrogenase 1
ALDH2;Aldehyde dehydrogenase, mitochondrial
ALDH3A1;Aldehyde dehydrogenase, dimeric NADP-preferring
ALDH5A1;Succinate-semialdehyde dehydrogenase, mitochondrial
ALMS1;Alstrom syndrome protein 1
ALPI;Intestinal-type alkaline phosphatase
ALPP;Alkaline phosphatase, placental type
AMBN;Ameloblastin
AMBP;Protein AMBP
AMDHD2;N-acetylglucosamine-6-phosphate deacetylase
AMFR;E3 ubiquitin-protein ligase AMFR
AMIGO1;Amphoterin-induced protein 1
AMIGO2;Amphoterin-induced protein 2
AMN;Protein amnionless
AMOT;Angiomotin
AMOTL2;Angiomotin-like protein 2
AMPD3;AMP deaminase 3
AMY1A_AMY1B_AMY1C;Alpha-amylase 1A_Alpha-amylase 1B_Alpha-amylase 1C
AMY2A;Pancreatic alpha-amylase
AMY2B;Alpha-amylase 2B
ANG;Angiogenin
ANGPT1;Angiopoietin-1
ANGPT2;Angiopoietin-2
ANGPTL1;Angiopoietin-related protein 1
ANGPTL2;Angiopoietin-related protein 2
ANGPTL3;Angiopoietin-related protein 3
ANGPTL4;Angiopoietin-related protein 4
ANGPTL7;Angiopoietin-related protein 7
ANK2;Ankyrin-2
ANKMY2;Ankyrin repeat and MYND domain-containing protein 2
ANKRA2;Ankyrin repeat family A protein 2
ANKRD54;Ankyrin repeat domain-containing protein 54
ANP32C;Acidic leucine-rich nuclear phosphoprotein 32 family member C
ANPEP;Aminopeptidase N
ANXA1;Annexin A1
ANXA10;Annexin A10
ANXA11;Annexin A11
ANXA2;Annexin A2
ANXA3;Annexin A3
ANXA4;Annexin A4
ANXA5;Annexin A5
AOC1;Amiloride-sensitive amine oxidase [copper-containing]
AOC3;Membrane primary amine oxidase
AP1G2;AP-1 complex subunit gamma-like 2
AP2B1;AP-2 complex subunit beta
AP3B1;AP-3 complex subunit beta-1
AP3S2;AP-3 complex subunit sigma-2
APBB1IP;Amyloid beta A4 precursor protein-binding family B member 1-interacting protein
APCS;Serum amyloid P-component
APEX1;DNA-(apurinic or apyrimidinic site) endonuclease
APLP1;Amyloid-like protein 1
APOA1;Apolipoprotein A-I
APOA2;Apolipoprotein A-II
APOA4;Apolipoprotein A-IV
APOB;Apolipoprotein B-100
APOBR;Apolipoprotein B receptor
APOC1;Apolipoprotein C-I
APOD;Apolipoprotein D
APOE;Apolipoprotein E
APOF;Apolipoprotein F
APOH;Beta-2-glycoprotein 1
APOL1;Apolipoprotein L1
APOM;Apolipoprotein M
APP;Amyloid-beta precursor protein
APPL2;DCC-interacting protein 13-beta
APRT;Adenine phosphoribosyltransferase
ARAF;Serine/threonine-protein kinase A-Raf
AREG;Amphiregulin
ARF6;ADP-ribosylation factor 6
ARFIP1;Arfaptin-1
ARG1;Arginase-1
ARG2;Arginase-2, mitochondrial
ARHGAP1;Rho GTPase-activating protein 1
ARHGAP25;Rho GTPase-activating protein 25
ARHGAP30;Rho GTPase-activating protein 30
ARHGAP45;Rho GTPase-activating protein 45
ARHGAP5;Rho GTPase-activating protein 5
ARHGEF1;Rho guanine nucleotide exchange factor 1
ARHGEF10;Rho guanine nucleotide exchange factor 10
ARHGEF12;Rho guanine nucleotide exchange factor 12
ARHGEF5;Rho guanine nucleotide exchange factor 5
ARID3A;AT-rich interactive domain-containing protein 3A
ARID4B;AT-rich interactive domain-containing protein 4B
ARL13B;ADP-ribosylation factor-like protein 13B
ARL2BP;ADP-ribosylation factor-like protein 2-binding protein
ARMCX2;Armadillo repeat-containing X-linked protein 2
ARNT;Aryl hydrocarbon receptor nuclear translocator
ARNTL;Aryl hydrocarbon receptor nuclear translocator-like protein 1
ARSA;Arylsulfatase A
ARSB;Arylsulfatase B
ART3;Ecto-ADP-ribosyltransferase 3
ART5;Ecto-ADP-ribosyltransferase 5
ARTN;Artemin
ASAH1;Acid ceramidase
ASAH2;Neutral ceramidase
ASGR1;Asialoglycoprotein receptor 1
ASGR2;Asialoglycoprotein receptor 2
ASPN;Asporin
ASPSCR1;Tether containing UBX domain for GLUT4
ASRGL1;Isoaspartyl peptidase/L-asparaginase
ASS1;Argininosuccinate synthase
ATF2;Cyclic AMP-dependent transcription factor ATF-2
ATF4;Cyclic AMP-dependent transcription factor ATF-4
ATG16L1;Autophagy-related protein 16-1
ATG4A;Cysteine protease ATG4A
ATOX1;Copper transport protein ATOX1
ATP1B1;Sodium/potassium-transporting ATPase subunit beta-1
ATP1B2;Sodium/potassium-transporting ATPase subunit beta-2
ATP1B3;Sodium/potassium-transporting ATPase subunit beta-3
ATP1B4;Protein ATP1B4
ATP2B4;Plasma membrane calcium-transporting ATPase 4
ATP5F1D;ATP synthase subunit delta, mitochondrial
ATP5IF1;ATPase inhibitor, mitochondrial
ATP5PO;ATP synthase subunit O, mitochondrial
ATP6AP2;Renin receptor
ATP6V1D;V-type proton ATPase subunit D
ATP6V1F;V-type proton ATPase subunit F
ATP6V1G1;V-type proton ATPase subunit G 1
ATP6V1G2;V-type proton ATPase subunit G 2
ATRAID;All-trans retinoic acid-induced differentiation factor
ATRN;Attractin, Isoform 2
ATXN10;Ataxin-10
ATXN2;Ataxin-2
ATXN2L;Ataxin-2-like protein
ATXN3;Ataxin-3
AXIN1;Axin-1
AXL;Tyrosine-protein kinase receptor UFO
AZI2;5-azacytidine-induced protein 2
AZU1;Azurocidin
B2M;Beta-2-microglobulin
B3GAT3;Galactosylgalactosylxylosylprotein 3-beta-glucuronosyltransferase 3
B3GNT7;UDP-GlcNAc:betaGal beta-1,3-N-acetylglucosaminyltransferase 7
B4GALT1;Beta-1,4-galactosyltransferase 1
B4GAT1;Beta-1,4-glucuronyltransferase 1
BABAM1;BRISC and BRCA1-A complex member 1
BACH1;Transcription regulator protein BACH1
BAG3;BAG family molecular chaperone regulator 3
BAG4;BAG family molecular chaperone regulator 4
BAG6;Large proline-rich protein BAG6
BAIAP2;Brain-specific angiogenesis inhibitor 1-associated protein 2
BAMBI;BMP and activin membrane-bound inhibitor homolog
BANK1;B-cell scaffold protein with ankyrin repeats
BAP18;Chromatin complexes subunit BAP18
BATF;Basic leucine zipper transcriptional factor ATF-like
BAX;Apoptosis regulator BAX
BCAM;Basal cell adhesion molecule
BCAN;Brevican core protein
BCAT1;Branched-chain-amino-acid aminotransferase, cytosolic
BCAT2;Branched-chain-amino-acid aminotransferase, mitochondrial
BCHE;Cholinesterase
BCL2;Apoptosis regulator Bcl-2
BCL2L1;Bcl-2-like protein 1
BCL2L11;Bcl-2-like protein 11, Isoform BimL
BCL2L15;Bcl-2-like protein 15
BCL7A;B-cell CLL/lymphoma 7 protein family member A
BCL7B;B-cell CLL/lymphoma 7 protein family member B
BCR;Breakpoint cluster region protein
BDNF;Brain-derived neurotrophic factor
BECN1;Beclin-1
BEX3;Protein BEX3
BGLAP;Osteocalcin
BGN;Biglycan
BHLHE40;Class E basic helix-loop-helix protein 40
BHMT2;S-methylmethionine--homocysteine S-methyltransferase BHMT2
BID;BH3-interacting domain death agonist
BIN2;Bridging integrator 2
BIRC2;Baculoviral IAP repeat-containing protein 2
BLMH;Bleomycin hydrolase
BLNK;B-cell linker protein
BLOC1S2;Biogenesis of lysosome-related organelles complex 1 subunit 2
BLOC1S3;Biogenesis of lysosome-related organelles complex 1 subunit 3
BLVRB;Flavin reductase
BMP10;Bone morphogenetic protein 10
BMP4;Bone morphogenetic protein 4
BMP6;Bone morphogenetic protein 6
BMPER;BMP-binding endothelial regulator protein
BNIP2;BCL2/adenovirus E1B 19 kDa protein-interacting protein 2
BNIP3L;BCL2/adenovirus E1B 19 kDa protein-interacting protein 3-like
BOC;Brother of CDO
BOLA1;BolA-like protein 1
BOLA2_BOLA2B;BolA-like protein 2
BPIFA2;BPI fold-containing family A member 2
BPIFB1;BPI fold-containing family B member 1
BPIFB2;BPI fold-containing family B member 2
BRAP;BRCA1-associated protein
BRD1;Bromodomain-containing protein 1
BRD2;Bromodomain-containing protein 2
BRD3;Bromodomain-containing protein 3
BRDT;Bromodomain testis-specific protein
BRK1;Protein BRICK1
BRME1;Break repair meiotic recombinase recruitment factor 1
BRSK2;Serine/threonine-protein kinase BRSK2
BSG;Basigin
BSND;Barttin
BST1;ADP-ribosyl cyclase/cyclic ADP-ribose hydrolase 2
BST2;Bone marrow stromal antigen 2
BTC;Probetacellulin
BTD;Biotinidase
BTLA;B- and T-lymphocyte attenuator
BTN1A1;Butyrophilin subfamily 1 member A1
BTN2A1;Butyrophilin subfamily 2 member A1
BTN3A2;Butyrophilin subfamily 3 member A2
BTNL10;Butyrophilin-like protein 10
C19orf12;Protein C19orf12
C1GALT1C1;C1GALT1-specific chaperone 1
C1QA;Complement C1q subcomponent subunit A
C1QBP;Complement component 1 Q subcomponent-binding protein, mitochondrial
C1QL2;Complement C1q-like protein 2
C1QTNF1;Complement C1q tumor necrosis factor-related protein 1
C1QTNF5;Complement C1q tumor necrosis factor-related protein 5
C1QTNF6;Complement C1q tumor necrosis factor-related protein 6
C1QTNF9;Complement C1q and tumor necrosis factor-related protein 9A
C1R;Complement C1r subcomponent
C1RL;Complement C1r subcomponent-like protein
C1S;Complement C1s subcomponent
C2;Complement C2
C2CD2L;Phospholipid transfer protein C2CD2L
C2orf69;UPF0565 protein C2orf69
C3;Complement C3
C4BPB;C4b-binding protein beta chain
C5;Complement C5
C7;Complement component C7
C7orf50;Uncharacterized protein C7orf50
C8B;Complement component C8 beta chain
C9;Complement component C9
C9orf40;Uncharacterized protein C9orf40
CA1;Carbonic anhydrase 1
CA11;Carbonic anhydrase-related protein 11
CA12;Carbonic anhydrase 12
CA13;Carbonic anhydrase 13
CA14;Carbonic anhydrase 14
CA2;Carbonic anhydrase 2
CA3;Carbonic anhydrase 3
CA4;Carbonic anhydrase 4
CA5A;Carbonic anhydrase 5A, mitochondrial
CA6;Carbonic anhydrase 6
CA7;Carbonic anhydrase 7
CA8;Carbonic anhydrase-related protein
CA9;Carbonic anhydrase 9
CABP2;Calcium-binding protein 2
CACNA1C;Voltage-dependent L-type calcium channel subunit alpha-1C
CACNA1H;Voltage-dependent T-type calcium channel subunit alpha-1H
CACNB1;Voltage-dependent L-type calcium channel subunit beta-1
CACNB3;Voltage-dependent L-type calcium channel subunit beta-3
CACYBP;Calcyclin-binding protein
CADPS;Calcium-dependent secretion activator 1
CALB1;Calbindin
CALB2;Calretinin
CALCA;Calcitonin
CALCB;Calcitonin gene-related peptide 2
CALCOCO1;Calcium-binding and coiled-coil domain-containing protein 1
CALCOCO2;Calcium-binding and coiled-coil domain-containing protein 2
CALY;Neuron-specific vesicular protein calcyon
CAMKK1;Calcium/calmodulin-dependent protein kinase kinase 1
CAMLG;Guided entry of tail-anchored proteins factor CAMLG
CAMSAP1;Calmodulin-regulated spectrin-associated protein 1
CANT1;Soluble calcium-activated nucleotidase 1
CAPG;Macrophage-capping protein
CAPN3;Calpain-3
CAPS;Calcyphosin
CARHSP1;Calcium-regulated heat-stable protein 1
CASC3;Protein CASC3
CASP1;Caspase-1
CASP10;Caspase-10
CASP2;Caspase-2
CASP3;Caspase-3
CASP4;Caspase-4
CASP7;Caspase-7
CASP8;Caspase-8
CASP9;Caspase-9
CASQ2;Calsequestrin-2
CAT;Catalase
CBLIF;Cobalamin binding intrinsic factor
CBLN1;Cerebellin-1
CBLN4;Cerebellin-4
CBS;Cystathionine beta-synthase
CBX2;Chromobox protein homolog 2
CC2D1A;Coiled-coil and C2 domain-containing protein 1A
CCAR2;Cell cycle and apoptosis regulator protein 2
CCDC134;Coiled-coil domain-containing protein 134
CCDC28A;Coiled-coil domain-containing protein 28A
CCDC50;Coiled-coil domain-containing protein 50
CCDC80;Coiled-coil domain-containing protein 80
CCER2;Coiled-coil domain-containing glutamate-rich protein 2
CCL11;Eotaxin
CCL13;C-C motif chemokine 13
CCL14;C-C motif chemokine 14
CCL15;C-C motif chemokine 15
CCL16;C-C motif chemokine 16
CCL17;C-C motif chemokine 17
CCL18;C-C motif chemokine 18
CCL19;C-C motif chemokine 19
CCL2;C-C motif chemokine 2
CCL20;C-C motif chemokine 20
CCL21;C-C motif chemokine 21
CCL22;C-C motif chemokine 22
CCL23;C-C motif chemokine 23
CCL24;C-C motif chemokine 24
CCL25;C-C motif chemokine 25
CCL26;C-C motif chemokine 26
CCL27;C-C motif chemokine 27
CCL28;C-C motif chemokine 28
CCL3;C-C motif chemokine 3
CCL4;C-C motif chemokine 4
CCL5;C-C motif chemokine 5
CCL7;C-C motif chemokine 7
CCL8;C-C motif chemokine 8
CCN1;CCN family member 1
CCN2;CCN family member 2
CCN3;CCN family member 3
CCN4;CCN family member 4
CCN5;CCN family member 5
CCND2;G1/S-specific cyclin-D2
CCNE1;G1/S-specific cyclin-E1
CCS;Copper chaperone for superoxide dismutase
CCT5;T-complex protein 1 subunit epsilon
CD101;Immunoglobulin superfamily member 2
CD109;CD109 antigen
CD14;Monocyte differentiation antigen CD14
CD160;CD160 antigen
CD163;Scavenger receptor cysteine-rich type 1 protein M130
CD164;Sialomucin core protein 24
CD164L2;CD164 sialomucin-like 2 protein
CD177;CD177 antigen
CD1C;T-cell surface glycoprotein CD1c
CD2;T-cell surface antigen CD2
CD200;OX-2 membrane glycoprotein
CD200R1;Cell surface glycoprotein CD200 receptor 1
CD207;C-type lectin domain family 4 member K
CD209;CD209 antigen
CD22;B-cell receptor CD22
CD226;CD226 antigen
CD244;Natural killer cell receptor 2B4
CD248;Endosialin
CD27;CD27 antigen
CD274;Programmed cell death 1 ligand 1
CD276;CD276 antigen
CD28;T-cell-specific surface glycoprotein CD28
CD2AP;CD2-associated protein
CD300A;CMRF35-like molecule 8
CD300C;CMRF35-like molecule 6
CD300E;CMRF35-like molecule 2
CD300LF;CMRF35-like molecule 1
CD300LG;CMRF35-like molecule 9
CD302;CD302 antigen
CD33;Myeloid cell surface antigen CD33
CD34;Hematopoietic progenitor cell antigen CD34
CD36;Platelet glycoprotein 4
CD38;ADP-ribosyl cyclase/cyclic ADP-ribose hydrolase 1
CD3D;T-cell surface glycoprotein CD3 delta chain
CD3E;T-cell surface glycoprotein CD3 epsilon chain
CD3G;T-cell surface glycoprotein CD3 gamma chain
CD4;T-cell surface glycoprotein CD4
CD40;Tumor necrosis factor receptor superfamily member 5
CD40LG;CD40 ligand
CD46;Membrane cofactor protein
CD48;CD48 antigen
CD5;T-cell surface glycoprotein CD5
CD55;Complement decay-accelerating factor
CD58;Lymphocyte function-associated antigen 3
CD59;CD59 glycoprotein
CD5L;CD5 antigen-like
CD6;T-cell differentiation antigen CD6
CD63;CD63 antigen
CD69;Early activation antigen CD69
CD7;T-cell antigen CD7
CD70;CD70 antigen
CD72;B-cell differentiation antigen CD72
CD74;HLA class II histocompatibility antigen gamma chain
CD79B;B-cell antigen receptor complex-associated protein beta chain
CD80;T-lymphocyte activation antigen CD80
CD82;CD82 antigen
CD83;CD83 antigen
CD84;SLAM family member 5
CD86;T-lymphocyte activation antigen CD86
CD8A;T-cell surface glycoprotein CD8 alpha chain
CD93;Complement component C1q receptor
CD99;CD99 antigen
CD99L2;CD99 antigen-like protein 2
CDA;Cytidine deaminase
CDAN1;Codanin-1
CDC123;Cell division cycle protein 123 homolog
CDC25A;M-phase inducer phosphatase 1
CDC26;Anaphase-promoting complex subunit CDC26
CDC27;Cell division cycle protein 27 homolog
CDC37;Hsp90 co-chaperone Cdc37
CDC42BPB;Serine/threonine-protein kinase MRCK beta
CDCP1;CUB domain-containing protein 1
CDH1;Cadherin-1
CDH15;Cadherin-15
CDH17;Cadherin-17
CDH2;Cadherin-2
CDH22;Cadherin-22
CDH23;Cadherin-23
CDH3;Cadherin-3
CDH4;Cadherin-4
CDH5;Cadherin-5
CDH6;Cadherin-6
CDHR1;Cadherin-related family member 1
CDHR2;Cadherin-related family member 2
CDHR5;Cadherin-related family member 5
CDK1;Cyclin-dependent kinase 1
CDK5RAP3;CDK5 regulatory subunit-associated protein 3
CDKL5;Cyclin-dependent kinase-like 5
CDKN1A;Cyclin-dependent kinase inhibitor 1
CDKN2D;Cyclin-dependent kinase 4 inhibitor D
CDNF;Cerebral dopamine neurotrophic factor
CDON;Cell adhesion molecule-related/down-regulated by oncogenes
CDSN;Corneodesmosin
CEACAM1;Carcinoembryonic antigen-related cell adhesion molecule 1
CEACAM16;Carcinoembryonic antigen-related cell adhesion molecule 16
CEACAM18;Carcinoembryonic antigen-related cell adhesion molecule 18
CEACAM19;Carcinoembryonic antigen-related cell adhesion molecule 19
CEACAM20;Carcinoembryonic antigen-related cell adhesion molecule 20
CEACAM21;Carcinoembryonic antigen-related cell adhesion molecule 21
CEACAM3;Carcinoembryonic antigen-related cell adhesion molecule 3
CEACAM5;Carcinoembryonic antigen-related cell adhesion molecule 5
CEACAM6;Carcinoembryonic antigen-related cell adhesion molecule 6
CEACAM8;Carcinoembryonic antigen-related cell adhesion molecule 8
CEBPA;CCAAT/enhancer-binding protein alpha
CEBPB;CCAAT/enhancer-binding protein beta
CELA2A;Chymotrypsin-like elastase family member 2A
CELA3A;Chymotrypsin-like elastase family member 3A
CELSR2;Cadherin EGF LAG seven-pass G-type receptor 2
CEMIP2;Cell surface hyaluronidase
CEND1;Cell cycle exit and neuronal differentiation protein 1
CENPF;Centromere protein F
CENPJ;Centromere protein J
CEP112;Centrosomal protein of 112 kDa
CEP152;Centrosomal protein of 152 kDa
CEP164;Centrosomal protein of 164 kDa
CEP170;Centrosomal protein of 170 kDa
CEP20;Centrosomal protein 20
CEP290;Centrosomal protein of 290 kDa
CEP350;Centrosome-associated protein 350
CEP43;Centrosomal protein 43
CEP85;Centrosomal protein of 85 kDa
CERT;Ceramide transfer protein
CES1;Liver carboxylesterase 1
CES2;Cocaine esterase
CES3;Carboxylesterase 3
CETN2;Centrin-2
CETN3;Centrin-3
CFB;Complement factor B
CFC1;Cryptic protein
CFD;Complement factor D
CFH;Complement factor H
CFHR2;Complement factor H-related protein 2
CFHR4;Complement factor H-related protein 4
CFHR5;Complement factor H-related protein 5
CFI;Complement factor I
CFP;Properdin
CGA;Glycoprotein hormones alpha chain
CGB3_CGB5_CGB8;Choriogonadotropin subunit beta 3
CGN;Cingulin
CGREF1;Cell growth regulator with EF hand domain protein 1
CHAC2;Glutathione-specific gamma-glutamylcyclotransferase 2
CHAD;Chondroadherin
CHCHD10;Coiled-coil-helix-coiled-coil-helix domain-containing protein 10, mitochondrial
CHCHD6;MICOS complex subunit MIC25
CHEK2;Serine/threonine-protein kinase Chk2
CHGA;Chromogranin-A
CHGB;Secretogranin-1
CHI3L1;Chitinase-3-like protein 1
CHIT1;Chitotriosidase-1
CHL1;Neural cell adhesion molecule L1-like protein
CHM;Rab proteins geranylgeranyltransferase component A 1
CHMP1A;Charged multivesicular body protein 1a
CHMP6;Charged multivesicular body protein 6
CHP1;Calcineurin B homologous protein 1
CHRDL1;Chordin-like protein 1
CHRDL2;Chordin-like protein 2
CHRM1;Muscarinic acetylcholine receptor M1
CIAPIN1;Anamorsin
CILP;Cartilage intermediate layer protein 1
CINP;Cyclin-dependent kinase 2-interacting protein
CIRBP;Cold-inducible RNA-binding protein
CIT;Citron Rho-interacting kinase
CKAP4;Cytoskeleton-associated protein 4
CKB;Creatine kinase B-type
CKMT1A_CKMT1B;Creatine kinase U-type, mitochondrial
CLASP1;CLIP-associating protein 1
CLC;Galectin-10
CLEC10A;C-type lectin domain family 10 member A
CLEC11A;C-type lectin domain family 11 member A
CLEC12A;C-type lectin domain family 12 member A
CLEC14A;C-type lectin domain family 14 member A
CLEC1A;C-type lectin domain family 1 member A
CLEC1B;C-type lectin domain family 1 member B
CLEC2L;C-type lectin domain family 2 member L
CLEC3B;Tetranectin
CLEC4A;C-type lectin domain family 4 member A
CLEC4C;C-type lectin domain family 4 member C
CLEC4D;C-type lectin domain family 4 member D
CLEC4G;C-type lectin domain family 4 member G
CLEC4M;C-type lectin domain family 4 member M
CLEC5A;C-type lectin domain family 5 member A
CLEC6A;C-type lectin domain family 6 member A
CLEC7A;C-type lectin domain family 7 member A
CLGN;Calmegin
CLIC5;Chloride intracellular channel protein 5
CLINT1;Clathrin interactor 1
CLIP2;CAP-Gly domain-containing linker protein 2
CLMP;CXADR-like membrane protein
CLNS1A;Methylosome subunit pICln
CLPP;ATP-dependent Clp protease proteolytic subunit, mitochondrial
CLPS;Colipase
CLSPN;Claspin
CLSTN1;Calsyntenin-1
CLSTN2;Calsyntenin-2
CLSTN3;Calsyntenin-3
CLTA;Clathrin light chain A
CLU;Clusterin
CLUL1;Clusterin-like protein 1
CMC1;COX assembly mitochondrial protein homolog
CMIP;C-Maf-inducing protein
CNDP1;Beta-Ala-His dipeptidase
CNGB3;Cyclic nucleotide-gated cation channel beta-3
CNP;2',3'-cyclic-nucleotide 3'-phosphodiesterase
CNPY2;Protein canopy homolog 2
CNPY4;Protein canopy homolog 4
CNST;Consortin
CNTF;Ciliary neurotrophic factor
CNTN1;Contactin-1
CNTN2;Contactin-2
CNTN3;Contactin-3
CNTN4;Contactin-4
CNTN5;Contactin-5
CNTNAP2;Contactin-associated protein-like 2
CNTNAP4;Contactin-associated protein-like 4
COCH;Cochlin
COL15A1;Collagen alpha-1(XV) chain
COL18A1;Collagen alpha-1(XVIII) chain
COL1A1;Collagen alpha-1(I) chain
COL24A1;Collagen alpha-1(XXIV) chain
COL28A1;Collagen alpha-1(XXVIII) chain
COL2A1;Collagen alpha-1(II) chain
COL3A1;Collagen alpha-1(III) chain
COL4A1;Collagen alpha-1(IV) chain
COL4A4;Collagen alpha-4(IV) chain
COL5A1;Collagen alpha-1(V) chain
COL6A3;Collagen alpha-3(VI) chain
COL9A1;Collagen alpha-1(IX) chain
COL9A2;Collagen alpha-2(IX) chain
COLEC12;Collectin-12
COMMD1;COMM domain-containing protein 1
COMMD9;COMM domain-containing protein 9
COMP;Cartilage oligomeric matrix protein
COMT;Catechol O-methyltransferase
COPB2;Coatomer subunit beta'
COPE;Coatomer subunit epsilon
COQ7;5-demethoxyubiquinone hydroxylase, mitochondrial
CORO1A;Coronin-1A
CORO6;Coronin-6
COX5B;Cytochrome c oxidase subunit 5B, mitochondrial
COX6B1;Cytochrome c oxidase subunit 6B1
CPA1;Carboxypeptidase A1
CPA2;Carboxypeptidase A2
CPA4;Carboxypeptidase A4
CPB1;Carboxypeptidase B
CPB2;Carboxypeptidase B2
CPE;Carboxypeptidase E
CPLX2;Complexin-2
CPM;Carboxypeptidase M
CPOX;Oxygen-dependent coproporphyrinogen-III oxidase, mitochondrial
CPPED1;Serine/threonine-protein phosphatase CPPED1
CPQ;Carboxypeptidase Q
CPTP;Ceramide-1-phosphate transfer protein
CPVL;Probable serine carboxypeptidase CPVL
CPXM1;Probable carboxypeptidase X1
CPXM2;Inactive carboxypeptidase-like protein X2
CR1;Complement receptor type 1
CR2;Complement receptor type 2
CRACR2A;EF-hand calcium-binding domain-containing protein 4B
CRADD;Death domain-containing protein CRADD
CREB3;Cyclic AMP-responsive element-binding protein 3
CREBZF;CREB/ATF bZIP transcription factor
CREG1;Protein CREG1
CRELD1;Protein disulfide isomerase CRELD1
CRELD2;Protein disulfide isomerase CRELD2
CRH;Corticoliberin
CRHBP;Corticotropin-releasing factor-binding protein
CRHR1;Corticotropin-releasing factor receptor 1
CRIM1;Cysteine-rich motor neuron 1 protein
CRIP2;Cysteine-rich protein 2
CRISP2;Cysteine-rich secretory protein 2
CRISP3;Cysteine-rich secretory protein 3
CRKL;Crk-like protein
CRLF1;Cytokine receptor-like factor 1
CRNN;Cornulin
CRTAC1;Cartilage acidic protein 1
CRTAM;Cytotoxic and regulatory T-cell molecule
CRTAP;Cartilage-associated protein
CRX;Cone-rod homeobox protein
CRYBB1;Beta-crystallin B1
CRYBB2;Beta-crystallin B2
CRYGD;Gamma-crystallin D
CRYM;Ketimine reductase mu-crystallin
CRYZL1;Quinone oxidoreductase-like protein 1
CSDE1;Cold shock domain-containing protein E1
CSF1;Macrophage colony-stimulating factor 1
CSF1R;Macrophage colony-stimulating factor 1 receptor
CSF2;Granulocyte-macrophage colony-stimulating factor
CSF2RA;Granulocyte-macrophage colony-stimulating factor receptor subunit alpha
CSF2RB;Cytokine receptor common subunit beta
CSF3;Granulocyte colony-stimulating factor
CSF3R;Granulocyte colony-stimulating factor receptor
CSH1;Chorionic somatomammotropin hormone 1
CSNK1D;Casein kinase I isoform delta
CSNK2A1;Casein kinase II subunit alpha
CSPG4;Chondroitin sulfate proteoglycan 4
CSPG5;Chondroitin sulfate proteoglycan 5
CSRP3;Cysteine and glycine-rich protein 3
CST1;Cystatin-SN
CST3;Cystatin-C
CST5;Cystatin-D
CST6;Cystatin-M
CST7;Cystatin-F
CSTB;Cystatin-B
CTAG1A_CTAG1B;Cancer/testis antigen 1
CTBS;Di-N-acetylchitobiase
CTF1;Cardiotrophin-1
CTHRC1;Collagen triple helix repeat-containing protein 1
CTLA4;Cytotoxic T-lymphocyte protein 4
CTNNA1;Catenin alpha-1
CTRB1;Chymotrypsinogen B
CTRC;Chymotrypsin-C
CTRL;Chymotrypsin-like protease CTRL-1
CTSB;Cathepsin B
CTSC;Dipeptidyl peptidase 1
CTSD;Cathepsin D
CTSE;Cathepsin E
CTSF;Cathepsin F
CTSH;Pro-cathepsin H
CTSL;Cathepsin L1
CTSO;Cathepsin O
CTSS;Cathepsin S
CTSV;Cathepsin L2
CTSZ;Cathepsin Z
CUZD1;CUB and zona pellucida-like domain-containing protein 1
CWC15;Spliceosome-associated protein CWC15 homolog
CX3CL1;Fractalkine
CXADR;Coxsackievirus and adenovirus receptor
CXCL1;Growth-regulated alpha protein
CXCL10;C-X-C motif chemokine 10
CXCL11;C-X-C motif chemokine 11
CXCL12;Stromal cell-derived factor 1
CXCL13;C-X-C motif chemokine 13
CXCL14;C-X-C motif chemokine 14
CXCL16;C-X-C motif chemokine 16
CXCL17;C-X-C motif chemokine 17
CXCL3;C-X-C motif chemokine 3
CXCL5;C-X-C motif chemokine 5
CXCL6;C-X-C motif chemokine 6
CXCL8;Interleukin-8
CXCL9;C-X-C motif chemokine 9
CYB5A;Cytochrome b5
CYB5R2;NADH-cytochrome b5 reductase 2
CYP24A1;1,25-dihydroxyvitamin D(3) 24-hydroxylase, mitochondrial
CYTH3;Cytohesin-3
CYTL1;Cytokine-like protein 1
DAAM1;Disheveled-associated activator of morphogenesis 1
DAB2;Disabled homolog 2
DAG1;Dystroglycan
DAND5;DAN domain family member 5
DAPK2;Death-associated protein kinase 2
DAPP1;Dual adapter for phosphotyrosine and 3-phosphotyrosine and 3-phosphoinositide
DARS1;Aspartate--tRNA ligase, cytoplasmic
DBH;Dopamine beta-hydroxylase
DBI;Acyl-CoA-binding protein
DBN1;Drebrin
DBNL;Drebrin-like protein
DCBLD2;Discoidin, CUB and LCCL domain-containing protein 2
DCC;Netrin receptor DCC
DCDC2C;Doublecortin domain-containing protein 2C
DCLRE1C;Protein artemis
DCN;Decorin
DCTD;Deoxycytidylate deaminase
DCTN1;Dynactin subunit 1
DCTN2;Dynactin subunit 2
DCTN6;Dynactin subunit 6
DCTPP1;dCTP pyrophosphatase 1
DCUN1D1;DCN1-like protein 1
DCUN1D2;DCN1-like protein 2
DCXR;L-xylulose reductase
DDA1;DET1- and DDB1-associated protein 1
DDAH1;N(G),N(G)-dimethylarginine dimethylaminohydrolase 1
DDC;Aromatic-L-amino-acid decarboxylase
DDHD2;Phospholipase DDHD2
DDI2;Protein DDI1 homolog 2
DDR1;Epithelial discoidin domain-containing receptor 1
DDT;D-dopachrome decarboxylase
DDX1;ATP-dependent RNA helicase DDX1
DDX25;ATP-dependent RNA helicase DDX25
DDX39A;ATP-dependent RNA helicase DDX39A
DDX4;Probable ATP-dependent RNA helicase DDX4
DDX53;Probable ATP-dependent RNA helicase DDX53
DDX58;Antiviral innate immune response receptor RIG-I
DECR1;2,4-dienoyl-CoA reductase, mitochondrial
DEFA1_DEFA1B;Neutrophil defensin 1
DEFB103A_DEFB103B;Beta-defensin 103
DEFB104A_DEFB104B;Beta-defensin 104
DEFB116;Beta-defensin 116
DEFB118;Beta-defensin 118
DEFB4A_DEFB4B;Beta-defensin 4A
DENND2B;DENN domain-containing protein 2B
DENR;Density-regulated protein
DFFA;DNA fragmentation factor subunit alpha
DGCR6;Protein DGCR6
DGKA;Diacylglycerol kinase alpha
DGKZ;Diacylglycerol kinase zeta
DHODH;Dihydroorotate dehydrogenase
DHPS;Deoxyhypusine synthase
DHRS4L2;Dehydrogenase/reductase SDR family member 4-like 2
DIABLO;Diablo homolog, mitochondrial
DIPK1C;Divergent protein kinase domain 1C
DIPK2B;Divergent protein kinase domain 2B
DKK1;Dickkopf-related protein 1
DKK3;Dickkopf-related protein 3
DKK4;Dickkopf-related protein 4
DKKL1;Dickkopf-like protein 1
DLG4;Disks large homolog 4
DLGAP5;Disks large-associated protein 5
DLK1;Protein delta homolog 1
DLL1;Delta-like protein 1
DLL4;Delta-like protein 4
DMD;Dystrophin
DMP1;Dentin matrix acidic phosphoprotein 1
DNAJA1;DnaJ homolog subfamily A member 1
DNAJA2;DnaJ homolog subfamily A member 2
DNAJA4;DnaJ homolog subfamily A member 4
DNAJB1;DnaJ homolog subfamily B member 1
DNAJB14;DnaJ homolog subfamily B member 14
DNAJB2;DnaJ homolog subfamily B member 2
DNAJB6;DnaJ homolog subfamily B member 6
DNAJB8;DnaJ homolog subfamily B member 8
DNAJC21;DnaJ homolog subfamily C member 21
DNAJC6;Putative tyrosine-protein phosphatase auxilin
DNAJC9;DnaJ homolog subfamily C member 9
DNER;Delta and Notch-like epidermal growth factor-related receptor
DNLZ;DNL-type zinc finger protein
DNM1;Dynamin-1
DNM3;Dynamin-3
DNMBP;Dynamin-binding protein
DNPEP;Aspartyl aminopeptidase
DNPH1;2'-deoxynucleoside 5'-phosphate N-hydrolase 1
DOC2B;Double C2-like domain-containing protein beta
DOCK9;Dedicator of cytokinesis protein 9
DOK1;Docking protein 1
DOK2;Docking protein 2
DPEP1;Dipeptidase 1
DPEP2;Dipeptidase 2
DPP10;Inactive dipeptidyl peptidase 10
DPP4;Dipeptidyl peptidase 4
DPP6;Dipeptidyl aminopeptidase-like protein 6
DPP7;Dipeptidyl peptidase 2
DPT;Dermatopontin
DPY30;Protein dpy-30 homolog
DRAXIN;Draxin
DRG2;Developmentally-regulated GTP-binding protein 2
DSC2;Desmocollin-2
DSCAM;Down syndrome cell adhesion molecule
DSG2;Desmoglein-2
DSG3;Desmoglein-3
DSG4;Desmoglein-4
DTD1;D-aminoacyl-tRNA deacylase 1
DTNB;Dystrobrevin beta
DTX2;Probable E3 ubiquitin-protein ligase DTX2
DTX3;Probable E3 ubiquitin-protein ligase DTX3
DTYMK;Thymidylate kinase
DUOX2;Dual oxidase 2
DUSP13;Dual specificity protein phosphatase 13 isoform A
DUSP29;Dual specificity phosphatase 29
DUSP3;Dual specificity protein phosphatase 3
DUT;Deoxyuridine 5'-triphosphate nucleotidohydrolase, mitochondrial
DXO;Decapping and exoribonuclease protein
DYNC1H1;Cytoplasmic dynein 1 heavy chain 1
DYNLT1;Dynein light chain Tctex-type 1
DYNLT3;Dynein light chain Tctex-type 3
EBAG9;Receptor-binding cancer antigen expressed on SiSo cells
EBI3_IL27;Interleukin-27
ECE1;Endothelin-converting enzyme 1
ECHDC3;Enoyl-CoA hydratase domain-containing protein 3, mitochondrial
ECHS1;Enoyl-CoA hydratase, mitochondrial
ECI2;Enoyl-CoA delta isomerase 2
ECM1;Extracellular matrix protein 1
ECSCR;Endothelial cell-specific chemotaxis regulator
EDA2R;Tumor necrosis factor receptor superfamily member 27
EDAR;Tumor necrosis factor receptor superfamily member EDAR
EDDM3B;Epididymal secretory protein E3-beta
EDEM2;ER degradation-enhancing alpha-mannosidase-like protein 2
EDF1;Endothelial differentiation-related factor 1
EDIL3;EGF-like repeat and discoidin I-like domain-containing protein 3
EDN1;Endothelin-1
EDNRB;Endothelin receptor type B
EEF1D;Elongation factor 1-delta
EFCAB14;EF-hand calcium-binding domain-containing protein 14
EFCAB2;Dynein regulatory complex protein 8
EFEMP1;EGF-containing fibulin-like extracellular matrix protein 1
EFHD1;EF-hand domain-containing protein D1
EFNA1;Ephrin-A1
EFNA4;Ephrin-A4
EFNB2;Ephrin-B2
EGF;Pro-epidermal growth factor
EGFL7;Epidermal growth factor-like protein 7
EGFLAM;Pikachurin
EGFR;Epidermal growth factor receptor
EGLN1;Egl nine homolog 1
EHBP1;EH domain-binding protein 1
EHD3;EH domain-containing protein 3
EIF1AX;Eukaryotic translation initiation factor 1A, X-chromosomal
EIF2AK2;Interferon-induced, double-stranded RNA-activated protein kinase
EIF2AK3;Eukaryotic translation initiation factor 2-alpha kinase 3
EIF2S2;Eukaryotic translation initiation factor 2 subunit 2
EIF4B;Eukaryotic translation initiation factor 4B
EIF4E;Eukaryotic translation initiation factor 4E
EIF4EBP1;Eukaryotic translation initiation factor 4E-binding protein 1
EIF4G1;Eukaryotic translation initiation factor 4 gamma 1
EIF4G3;Eukaryotic translation initiation factor 4 gamma 3
EIF5;Eukaryotic translation initiation factor 5
EIF5A;Eukaryotic translation initiation factor 5A-1
ELAC1;Zinc phosphodiesterase ELAC protein 1
ELAVL4;ELAV-like protein 4
ELN;Elastin
ELOA;Elongin-A
ELOB;Elongin-B
ENAH;Protein enabled homolog
ENDOU;Poly(U)-specific endoribonuclease
ENG;Endoglin
ENO1;Alpha-enolase
ENO2;Gamma-enolase
ENO3;Beta-enolase
ENOPH1;Enolase-phosphatase E1
ENOX2;Ecto-NOX disulfide-thiol exchanger 2
ENPEP;Glutamyl aminopeptidase
ENPP2;Ectonucleotide pyrophosphatase/phosphodiesterase family member 2
ENPP5;Ectonucleotide pyrophosphatase/phosphodiesterase family member 5
ENPP6;Glycerophosphocholine cholinephosphodiesterase ENPP6
ENPP7;Ectonucleotide pyrophosphatase/phosphodiesterase family member 7
ENSA;Alpha-endosulfine
ENTPD2;Ectonucleoside triphosphate diphosphohydrolase 2
ENTPD5;Ectonucleoside triphosphate diphosphohydrolase 5
ENTPD6;Ectonucleoside triphosphate diphosphohydrolase 6
ENTR1;Endosome-associated-trafficking regulator 1
EP300;Histone acetyltransferase p300
EPB41L5;Band 4.1-like protein 5
EPCAM;Epithelial cell adhesion molecule
EPGN;Epigen
EPHA1;Ephrin type-A receptor 1
EPHA10;Ephrin type-A receptor 10
EPHA2;Ephrin type-A receptor 2
EPHA4;Ephrin type-A receptor 4
EPHB4;Ephrin type-B receptor 4
EPHB6;Ephrin type-B receptor 6
EPHX2;Bifunctional epoxide hydrolase 2
EPN1;Epsin-1
EPO;Erythropoietin
EPPK1;Epiplakin
EPS8L2;Epidermal growth factor receptor kinase substrate 8-like protein 2
ERBB2;Receptor tyrosine-protein kinase erbB-2
ERBB3;Receptor tyrosine-protein kinase erbB-3
ERBB4;Receptor tyrosine-protein kinase erbB-4
ERBIN;Erbin
ERC2;ERC protein 2
ERCC1;DNA excision repair protein ERCC-1
EREG;Proepiregulin
ERI1;3'-5' exoribonuclease 1
ERMAP;Erythroid membrane-associated protein
ERN1;Serine/threonine-protein kinase/endoribonuclease IRE1
ERP29;Endoplasmic reticulum resident protein 29
ERP44;Endoplasmic reticulum resident protein 44
ERVV-1;Endogenous retrovirus group V member 1 Env polyprotein
ESAM;Endothelial cell-selective adhesion molecule
ESM1;Endothelial cell-specific molecule 1
ESPL1;Separin
ESR1;Estrogen receptor
ESYT2;Extended synaptotagmin-2
EVI2B;Protein EVI2B
EVI5;Ecotropic viral integration site 5 protein homolog
EVPL;Envoplakin
EXOSC10;Exosome component 10
EXTL1;Exostosin-like 1
EZR;Ezrin
F10;Coagulation factor X
F11;Coagulation factor XI
F11R;Junctional adhesion molecule A
F12;Coagulation factor XII
F13B;Coagulation factor XIII B chain
F2;Prothrombin
F2R;Proteinase-activated receptor 1
F3;Tissue factor
F7;Coagulation factor VII
F9;Coagulation factor IX
FABP1;Fatty acid-binding protein, liver
FABP2;Fatty acid-binding protein, intestinal
FABP3;Fatty acid-binding protein, heart
FABP4;Fatty acid-binding protein, adipocyte
FABP5;Fatty acid-binding protein 5
FABP6;Gastrotropin
FABP9;Fatty acid-binding protein 9
FADD;FAS-associated death domain protein
FAM13A;Protein FAM13A
FAM171A2;Protein FAM171A2
FAM171B;Protein FAM171B
FAM172A;Cotranscriptional regulator FAM172A
FAM20A;Pseudokinase FAM20A
FAM3B;Protein FAM3B
FAM3C;Protein FAM3C
FAM3D;Protein FAM3D
FAP;Prolyl endopeptidase FAP
FARSA;Phenylalanine--tRNA ligase alpha subunit
FAS;Tumor necrosis factor receptor superfamily member 6
FASLG;Tumor necrosis factor ligand superfamily member 6
FBLN2;Fibulin-2
FBN2;Fibrillin-2
FBP1;Fructose-1,6-bisphosphatase 1
FCAMR;High affinity immunoglobulin alpha and immunoglobulin mu Fc receptor
FCAR;Immunoglobulin alpha Fc receptor
FCER1A;High affinity immunoglobulin epsilon receptor subunit alpha
FCER2;Low affinity immunoglobulin epsilon Fc receptor
FCGR2A;Low affinity immunoglobulin gamma Fc region receptor II-a
FCGR2B;Low affinity immunoglobulin gamma Fc region receptor II-b
FCGR3B;Low affinity immunoglobulin gamma Fc region receptor III-B
FCN1;Ficolin-1
FCN2;Ficolin-2
FCRL1;Fc receptor-like protein 1
FCRL2;Fc receptor-like protein 2
FCRL3;Fc receptor-like protein 3
FCRL5;Fc receptor-like protein 5
FCRL6;Fc receptor-like protein 6
FCRLB;Fc receptor-like B
FDX1;Adrenodoxin, mitochondrial
FDX2;Ferredoxin-2, mitochondrial
FEN1;Flap endonuclease 1
FES;Tyrosine-protein kinase Fes/Fps
FETUB;Fetuin-B
FGA;Fibrinogen alpha chain
FGD3;FYVE, RhoGEF and PH domain-containing protein 3
FGF12;Fibroblast growth factor 12
FGF16;Fibroblast growth factor 16
FGF19;Fibroblast growth factor 19
FGF2;Fibroblast growth factor 2
FGF20;Fibroblast growth factor 20
FGF21;Fibroblast growth factor 21
FGF23;Fibroblast growth factor 23
FGF3;Fibroblast growth factor 3
FGF5;Fibroblast growth factor 5
FGF6;Fibroblast growth factor 6
FGF7;Fibroblast growth factor 7
FGF9;Fibroblast growth factor 9
FGFBP1;Fibroblast growth factor-binding protein 1
FGFBP2;Fibroblast growth factor-binding protein 2
FGFBP3;Fibroblast growth factor-binding protein 3
FGFR2;Fibroblast growth factor receptor 2
FGFR4;Fibroblast growth factor receptor 4
FGL1;Fibrinogen-like protein 1
FGR;Tyrosine-protein kinase Fgr
FH;Fumarate hydratase, mitochondrial
FHIP2A;FHF complex subunit HOOK interacting protein 2A
FHIT;Bis(5'-adenosyl)-triphosphatase
FIS1;Mitochondrial fission 1 protein
FKBP14;Peptidyl-prolyl cis-trans isomerase FKBP14
FKBP1B;Peptidyl-prolyl cis-trans isomerase FKBP1B
FKBP4;Peptidyl-prolyl cis-trans isomerase FKBP4
FKBP5;Peptidyl-prolyl cis-trans isomerase FKBP5
FKBP7;Peptidyl-prolyl cis-trans isomerase FKBP7
FKBPL;FK506-binding protein-like
FLI1;Friend leukemia integration 1 transcription factor
FLRT2;Leucine-rich repeat transmembrane protein FLRT2
FLT1;Vascular endothelial growth factor receptor 1
FLT3;Receptor-type tyrosine-protein kinase FLT3
FLT3LG;Fms-related tyrosine kinase 3 ligand
FLT4;Vascular endothelial growth factor receptor 3
FMNL1;Formin-like protein 1
FMR1;Synaptic functional regulator FMR1
FN1;Fibronectin
FNDC1;Fibronectin type III domain-containing protein 1
FNTA;Protein farnesyltransferase/geranylgeranyltransferase type-1 subunit alpha
FOLH1;Glutamate carboxypeptidase 2
FOLR1;Folate receptor alpha
FOLR2;Folate receptor beta
FOLR3;Folate receptor gamma
FOS;Proto-oncogene c-Fos
FOSB;Protein fosB
FOXJ3;Forkhead box protein J3
FOXO1;Forkhead box protein O1
FOXO3;Forkhead box protein O3
FRMD4B;FERM domain-containing protein 4B
FRMD7;FERM domain-containing protein 7
FRZB;Secreted frizzled-related protein 3
FSHB;Follitropin subunit beta
FST;Follistatin
FSTL1;Follistatin-related protein 1
FSTL3;Follistatin-related protein 3
FTCD;Formimidoyltransferase-cyclodeaminase
FUCA1;Tissue alpha-L-fucosidase
FUOM;Fucose mutarotase
FURIN;Furin
FUS;RNA-binding protein FUS
FUT1;Galactoside alpha-(1,2)-fucosyltransferase 1
FUT3_FUT5;3-galactosyl-N-acetylglucosaminide 4-alpha-L-fucosyltransferase FUT3_4-galactosyl-N-acetylglucosaminide 3-alpha-L-fucosyltransferase FUT5
FUT8;Alpha-(1,6)-fucosyltransferase
FXN;Frataxin, mitochondrial
FXYD5;FXYD domain-containing ion transport regulator 5
FYB1;FYN-binding protein 1
FZD10;Frizzled-10
FZD8;Frizzled-8
GABARAP;Gamma-aminobutyric acid receptor-associated protein
GABARAPL1;Gamma-aminobutyric acid receptor-associated protein-like 1
GABRA4;Gamma-aminobutyric acid receptor subunit alpha-4
GAD1;Glutamate decarboxylase 1
GAD2;Glutamate decarboxylase 2
GADD45B;Growth arrest and DNA damage-inducible protein GADD45 beta
GADD45GIP1;Growth arrest and DNA damage-inducible proteins-interacting protein 1
GAGE2A;G antigen 2A
GAL;Galanin peptides
GALNT10;Polypeptide N-acetylgalactosaminyltransferase 10
GALNT2;Polypeptide N-acetylgalactosaminyltransferase 2
GALNT3;Polypeptide N-acetylgalactosaminyltransferase 3
GALNT5;Polypeptide N-acetylgalactosaminyltransferase 5
GALNT7;N-acetylgalactosaminyltransferase 7
GAMT;Guanidinoacetate N-methyltransferase
GAPDH;Glyceraldehyde-3-phosphate dehydrogenase
GART;Trifunctional purine biosynthetic protein adenosine-3
GAS2;Growth arrest-specific protein 2
GAS6;Growth arrest-specific protein 6
GASK1A;Golgi-associated kinase 1A
GAST;Gastrin
GATA3;Trans-acting T-cell-specific transcription factor GATA-3
GATD3;Glutamine amidotransferase-like class 1 domain-containing protein 3B, mitochondrial
GBA;Lysosomal acid glucosylceramidase
GBP1;Guanylate-binding protein 1
GBP2;Guanylate-binding protein 2
GBP4;Guanylate-binding protein 4
GBP6;Guanylate-binding protein 6
GC;Vitamin D-binding protein
GCC1;GRIP and coiled-coil domain-containing protein 1
GCG;Pro-glucagon
GCHFR;GTP cyclohydrolase 1 feedback regulatory protein
GCLM;Glutamate--cysteine ligase regulatory subunit
GCNT1;Beta-1,3-galactosyl-O-glycosyl-glycoprotein beta-1,6-N-acetylglucosaminyltransferase
GDF15;Growth/differentiation factor 15
GDF2;Growth/differentiation factor 2
GDNF;Glial cell line-derived neurotrophic factor
GET3;ATPase GET3
GFAP;Glial fibrillary acidic protein
GFER;FAD-linked sulfhydryl oxidase ALR
GFOD2;Glucose-fructose oxidoreductase domain-containing protein 2
GFRA1;GDNF family receptor alpha-1
GFRA2;GDNF family receptor alpha-2
GFRA3;GDNF family receptor alpha-3
GFRAL;GDNF family receptor alpha-like
GGA1;ADP-ribosylation factor-binding protein GGA1
GGACT;Gamma-glutamylaminecyclotransferase
GGCT;Gamma-glutamylcyclotransferase
GGH;Gamma-glutamyl hydrolase
GGT1;Glutathione hydrolase 1 proenzyme
GGT5;Glutathione hydrolase 5 proenzyme
GH1;Somatotropin
GH2;Growth hormone variant
GHR;Growth hormone receptor
GHRHR;Growth hormone-releasing hormone receptor
GHRL;Appetite-regulating hormone
GID8;Glucose-induced degradation protein 8 homolog
GIGYF2;GRB10-interacting GYF protein 2
GIMAP7;GTPase IMAP family member 7
GIMAP8;GTPase IMAP family member 8
GIP;Gastric inhibitory polypeptide
GIPC2;PDZ domain-containing protein GIPC2
GIPC3;PDZ domain-containing protein GIPC3
GIPR;Gastric inhibitory polypeptide receptor
GIT1;ARF GTPase-activating protein GIT1
GJA8;Gap junction alpha-8 protein
GKN1;Gastrokine-1
GLA;Alpha-galactosidase A
GLB1;Beta-galactosidase
GLI2;Zinc finger protein GLI2
GLIPR1;Glioma pathogenesis-related protein 1
GLO1;Lactoylglutathione lyase
GLOD4;Glyoxalase domain-containing protein 4
GLP1R;Glucagon-like peptide 1 receptor
GLRX;Glutaredoxin-1
GLRX5;Glutaredoxin-related protein 5, mitochondrial
GLT8D2;Glycosyltransferase 8 domain-containing protein 2
GLYR1;Putative oxidoreductase GLYR1
GM2A;Ganglioside GM2 activator
GMFG;Glia maturation factor gamma
GMPR;GMP reductase 1
GMPR2;GMP reductase 2
GNAS;Neuroendocrine secretory protein 55
GNE;Bifunctional UDP-N-acetylglucosamine 2-epimerase/N-acetylmannosamine kinase
GNGT1;Guanine nucleotide-binding protein G(T) subunit gamma-T1
GNLY;Granulysin
GNPDA1;Glucosamine-6-phosphate isomerase 1
GNPDA2;Glucosamine-6-phosphate isomerase 2
GOLGA3;Golgin subfamily A member 3
GOLM2;Protein GOLM2
GOPC;Golgi-associated PDZ and coiled-coil motif-containing protein
GORASP2;Golgi reassembly-stacking protein 2
GOT1;Aspartate aminotransferase, cytoplasmic
GP1BA;Platelet glycoprotein Ib alpha chain
GP1BB;Platelet glycoprotein Ib beta chain
GP2;Pancreatic secretory granule membrane major glycoprotein GP2
GP5;Platelet glycoprotein V
GP6;Platelet glycoprotein VI
GPA33;Cell surface A33 antigen
GPC1;Glypican-1
GPC5;Glypican-5
GPD1;Glycerol-3-phosphate dehydrogenase
GPHA2;Glycoprotein hormone alpha-2
GPI;Glucose-6-phosphate isomerase
GPIHBP1;Glycosylphosphatidylinositol-anchored high density lipoprotein-binding protein 1
GPKOW;G-patch domain and KOW motifs-containing protein
GPNMB;Transmembrane glycoprotein NMB
GPR101;Probable G-protein coupled receptor 101
GPR158;Probable G-protein coupled receptor 158
GPR15L;Protein GPR15L
GPR37;Prosaposin receptor GPR37
GPRC5C;G-protein coupled receptor family C group 5 member C
GRAP2;GRB2-related adapter protein 2
GRHPR;Glyoxylate reductase/hydroxypyruvate reductase
GRIK2;Glutamate receptor ionotropic, kainate 2
GRIN2B;Glutamate receptor ionotropic, NMDA 2B
GRK5;G protein-coupled receptor kinase 5
GRN;Progranulin
GRP;Gastrin-releasing peptide
GRPEL1;GrpE protein homolog 1, mitochondrial
GRSF1;G-rich sequence factor 1
GSAP;Gamma-secretase-activating protein
GSN;Gelsolin
GSR;Glutathione reductase, mitochondrial
GSTA1;Glutathione S-transferase A1
GSTA3;Glutathione S-transferase A3
GSTM4;Glutathione S-transferase Mu 4
GSTP1;Glutathione S-transferase P
GSTT2B;Glutathione S-transferase theta-2B
GTF2IRD1;General transcription factor II-I repeat domain-containing protein 1
GTPBP2;GTP-binding protein 2
GUCA2A;Guanylin
GUCY2C;Heat-stable enterotoxin receptor
GUK1;Guanylate kinase
GUSB;Beta-glucuronidase
GYS1;Glycogen [starch] synthase, muscle
GZMA;Granzyme A
GZMB;Granzyme B
GZMH;Granzyme H
H2AP;Huntingtin-interacting protein M
HADH;Hydroxyacyl-coenzyme A dehydrogenase, mitochondrial
HAGH;Hydroxyacylglutathione hydrolase, mitochondrial
HAO1;Hydroxyacid oxidase 1
HARS1;Histidine--tRNA ligase, cytoplasmic
HAVCR1;Hepatitis A virus cellular receptor 1
HAVCR2;Hepatitis A virus cellular receptor 2
HBEGF;Proheparin-binding EGF-like growth factor
HBQ1;Hemoglobin subunit theta-1
HBZ;Hemoglobin subunit zeta
HCG22;Protein PBMUCL2
HCLS1;Hematopoietic lineage cell-specific protein
HDAC8;Histone deacetylase 8
HDAC9;Histone deacetylase 9
HDDC2;5'-deoxynucleotidase HDDC2
HDGF;Hepatoma-derived growth factor
HDGFL2;Hepatoma-derived growth factor-related protein 2
HEBP1;Heme-binding protein 1
HEG1;Protein HEG homolog 1
HEPACAM2;HEPACAM family member 2
HEPH;Hephaestin
HEXIM1;Protein HEXIM1
HGF;Hepatocyte growth factor
HGFAC;Hepatocyte growth factor activator
HGS;Hepatocyte growth factor-regulated tyrosine kinase substrate
HHEX;Hematopoietically-expressed homeobox protein HHEX
HIF1A;Hypoxia-inducible factor 1-alpha
HIP1;Huntingtin-interacting protein 1
HIP1R;Huntingtin-interacting protein 1-related protein
HJV;Hemojuvelin
HK2;Hexokinase-2
HLA-A;HLA class I histocompatibility antigen, A alpha chain
HLA-DRA;HLA class II histocompatibility antigen, DR alpha chain
HLA-E;HLA class I histocompatibility antigen, alpha chain E
HMBS;Porphobilinogen deaminase
HMCN2;Hemicentin-2
HMGCL;Hydroxymethylglutaryl-CoA lyase, mitochondrial
HMGCS1;Hydroxymethylglutaryl-CoA synthase, cytoplasmic
HMMR;Hyaluronan mediated motility receptor
HMOX1;Heme oxygenase 1
HMOX2;Heme oxygenase 2
HNF1A;Hepatocyte nuclear factor 1-alpha
HNMT;Histamine N-methyltransferase
HNRNPK;Heterogeneous nuclear ribonucleoprotein K
HNRNPUL1;Heterogeneous nuclear ribonucleoprotein U-like protein 1
HPCAL1;Hippocalcin-like protein 1
HPGDS;Hematopoietic prostaglandin D synthase
HPSE;Heparanase
HRAS;GTPase Hras
HRC;Sarcoplasmic reticulum histidine-rich calcium-binding protein
HRG;Histidine-rich glycoprotein
HS1BP3;HCLS1-binding protein 3
HS3ST3B1;Heparan sulfate glucosamine 3-O-sulfotransferase 3B1
HS6ST1;Heparan-sulfate 6-O-sulfotransferase 1
HS6ST2;Heparan-sulfate 6-O-sulfotransferase 2
HSBP1;Heat shock factor-binding protein 1
HSD11B1;Corticosteroid 11-beta-dehydrogenase isozyme 1
HSD17B14;17-beta-hydroxysteroid dehydrogenase 14
HSD17B3;Testosterone 17-beta-dehydrogenase 3
HSDL2;Hydroxysteroid dehydrogenase-like protein 2
HSP90B1;Endoplasmin
HSPA1A;Heat shock 70 kDa protein 1A
HSPA2;Heat shock-related 70 kDa protein 2
HSPB1;Heat shock protein beta-1
HSPB6;Heat shock protein beta-6
HSPG2;Basement membrane-specific heparan sulfate proteoglycan core protein
HTR1A;5-hydroxytryptamine receptor 1A
HTR1B;5-hydroxytryptamine receptor 1B
HTRA2;Serine protease HTRA2, mitochondrial
HYAL1;Hyaluronidase-1
HYOU1;Hypoxia up-regulated protein 1
ICA1;Islet cell autoantigen 1
ICAM1;Intercellular adhesion molecule 1
ICAM2;Intercellular adhesion molecule 2
ICAM3;Intercellular adhesion molecule 3
ICAM4;Intercellular adhesion molecule 4
ICAM5;Intercellular adhesion molecule 5
ICOSLG;ICOS ligand
ID4;DNA-binding protein inhibitor ID-4
IDI2;Isopentenyl-diphosphate delta-isomerase 2
IDO1;Indoleamine 2,3-dioxygenase 1
IDS;Iduronate 2-sulfatase
IDUA;Alpha-L-iduronidase
IFI30;Gamma-interferon-inducible lysosomal thiol reductase
IFIT1;Interferon-induced protein with tetratricopeptide repeats 1
IFIT3;Interferon-induced protein with tetratricopeptide repeats 3
IFNAR1;Interferon alpha/beta receptor 1
IFNG;Interferon gamma
IFNGR1;Interferon gamma receptor 1
IFNGR2;Interferon gamma receptor 2
IFNL1;Interferon lambda-1
IFNL2;Interferon lambda-2
IFNLR1;Interferon lambda receptor 1
IFNW1;Interferon omega-1
IFT20;Intraflagellar transport protein 20 homolog
IGBP1;Immunoglobulin-binding protein 1
IGDCC3;Immunoglobulin superfamily DCC subclass member 3
IGDCC4;Immunoglobulin superfamily DCC subclass member 4
IGF1R;Insulin-like growth factor 1 receptor
IGF2BP3;Insulin-like growth factor 2 mRNA-binding protein 3
IGF2R;Cation-independent mannose-6-phosphate receptor
IGFBP1;Insulin-like growth factor-binding protein 1
IGFBP2;Insulin-like growth factor-binding protein 2
IGFBP3;Insulin-like growth factor-binding protein 3
IGFBP4;Insulin-like growth factor-binding protein 4
IGFBP6;Insulin-like growth factor-binding protein 6
IGFBP7;Insulin-like growth factor-binding protein 7
IGFBPL1;Insulin-like growth factor-binding protein-like 1
IGFL4;Insulin growth factor-like family member 4
IGHMBP2;DNA-binding protein SMUBP-2
IGLC2;Immunoglobulin lambda constant 2
IGLON5;IgLON family member 5
IGSF21;Immunoglobulin superfamily member 21
IGSF3;Immunoglobulin superfamily member 3
IGSF8;Immunoglobulin superfamily member 8
IGSF9;Protein turtle homolog A
IKBKG;NF-kappa-B essential modulator
IKZF2;Zinc finger protein Helios
IL10;Interleukin-10
IL10RA;Interleukin-10 receptor subunit alpha
IL10RB;Interleukin-10 receptor subunit beta
IL11;Interleukin-11
IL12A_IL12B;Interleukin-12
IL12B;Interleukin-12 subunit beta
IL12RB1;Interleukin-12 receptor subunit beta-1
IL12RB2;Interleukin-12 receptor subunit beta-2
IL13;Interleukin-13
IL13RA1;Interleukin-13 receptor subunit alpha-1
IL13RA2;Interleukin-13 receptor subunit alpha-2
IL15;Interleukin-15
IL15RA;Interleukin-15 receptor subunit alpha
IL16;Pro-interleukin-16
IL17A;Interleukin-17A
IL17C;Interleukin-17C
IL17D;Interleukin-17D
IL17F;Interleukin-17F
IL17RA;Interleukin-17 receptor A
IL17RB;Interleukin-17 receptor B
IL18;Interleukin-18
IL18BP;Interleukin-18-binding protein
IL18R1;Interleukin-18 receptor 1
IL18RAP;Interleukin-18 receptor accessory protein
IL19;Interleukin-19
IL1A;Interleukin-1 alpha
IL1B;Interleukin-1 beta
IL1R1;Interleukin-1 receptor type 1
IL1R2;Interleukin-1 receptor type 2
IL1RAP;Interleukin-1 receptor accessory protein
IL1RL1;Interleukin-1 receptor-like 1
IL1RL2;Interleukin-1 receptor-like 2
IL1RN;Interleukin-1 receptor antagonist protein
IL2;Interleukin-2
IL20;Interleukin-20
IL20RA;Interleukin-20 receptor subunit alpha
IL20RB;Interleukin-20 receptor subunit beta
IL21R;Interleukin-21 receptor
IL22;Interleukin-22
IL22RA1;Interleukin-22 receptor subunit alpha-1
IL24;Interleukin-24
IL25;Interleukin-25
IL2RA;Interleukin-2 receptor subunit alpha
IL2RB;Interleukin-2 receptor subunit beta
IL2RG;Cytokine receptor common subunit gamma
IL3;Interleukin-3
IL31;Interleukin-31
IL31RA;Interleukin-31 receptor subunit alpha
IL32;Interleukin-32
IL33;Interleukin-33
IL34;Interleukin-34
IL36A;Interleukin-36 alpha
IL36G;Interleukin-36 gamma
IL3RA;Interleukin-3 receptor subunit alpha
IL4;Interleukin-4
IL4R;Interleukin-4 receptor subunit alpha
IL5;Interleukin-5
IL5RA;Interleukin-5 receptor subunit alpha
IL6;Interleukin-6
IL6R;Interleukin-6 receptor subunit alpha
IL6ST;Interleukin-6 receptor subunit beta
IL7;Interleukin-7
IL7R;Interleukin-7 receptor subunit alpha
IL9;Interleukin-9
ILKAP;Integrin-linked kinase-associated serine/threonine phosphatase 2C
IMMT;MICOS complex subunit MIC60
IMPA1;Inositol monophosphatase 1
IMPACT;Protein IMPACT
IMPG1;Interphotoreceptor matrix proteoglycan 1
ING1;Inhibitor of growth protein 1
INHBB;Inhibin beta B chain
INHBC;Inhibin beta C chain
INPP1;Inositol polyphosphate 1-phosphatase
INPP5D;Phosphatidylinositol 3,4,5-trisphosphate 5-phosphatase 1
INPP5J;Phosphatidylinositol 4,5-bisphosphate 5-phosphatase A
INPPL1;Phosphatidylinositol 3,4,5-trisphosphate 5-phosphatase 2
INSL3;Insulin-like 3
INSL4;Early placenta insulin-like peptide
INSL5;Insulin-like peptide INSL5
INSR;Insulin receptor
IPCEF1;Interactor protein for cytohesin exchange factors 1
IQGAP2;Ras GTPase-activating-like protein IQGAP2
IRAG2;Inositol 1,4,5-triphosphate receptor associated 2
IRAK1;Interleukin-1 receptor-associated kinase 1
IRAK4;Interleukin-1 receptor-associated kinase 4
ISLR2;Immunoglobulin superfamily containing leucine-rich repeat protein 2
ISM1;Isthmin-1
ISM2;Isthmin-2
IST1;IST1 homolog
ITGA11;Integrin alpha-11
ITGA2;Integrin alpha-2
ITGA5;Integrin alpha-5
ITGA6;Integrin alpha-6
ITGAL;Integrin alpha-L
ITGAM;Integrin alpha-M
ITGAV;Integrin alpha-V
ITGAX;Integrin alpha-X
ITGB1;Integrin beta-1
ITGB1BP1;Integrin beta-1-binding protein 1
ITGB1BP2;Integrin beta-1-binding protein 2
ITGB2;Integrin beta-2
ITGB5;Integrin beta-5
ITGB6;Integrin beta-6
ITGB7;Integrin beta-7
ITGBL1;Integrin beta-like protein 1
ITIH1;Inter-alpha-trypsin inhibitor heavy chain H1
ITIH3;Inter-alpha-trypsin inhibitor heavy chain H3
ITIH4;Inter-alpha-trypsin inhibitor heavy chain H4
ITIH5;Inter-alpha-trypsin inhibitor heavy chain H5
ITM2A;Integral membrane protein 2A
ITPA;Inosine triphosphate pyrophosphatase
ITPR1;Inositol 1,4,5-trisphosphate receptor type 1
ITPRIP;Inositol 1,4,5-trisphosphate receptor-interacting protein
IVD;Isovaleryl-CoA dehydrogenase, mitochondrial
IZUMO1;Izumo sperm-egg fusion protein 1
JAM2;Junctional adhesion molecule B
JAM3;Junctional adhesion molecule C
JCHAIN;Immunoglobulin J chain
JMJD1C;Probable JmjC domain-containing histone demethylation protein 2C
JPT2;Jupiter microtubule associated homolog 2
JUN;Transcription factor AP-1
KAZALD1;Kazal-type serine protease inhibitor domain-containing protein 1
KAZN;Kazrin
KCNC4;Potassium voltage-gated channel subfamily C member 4
KCNH2;Potassium voltage-gated channel subfamily H member 2
KCNIP4;Kv channel-interacting protein 4
KCTD5;BTB/POZ domain-containing protein KCTD5
KDM3A;Lysine-specific demethylase 3A
KDR;Vascular endothelial growth factor receptor 2
KEL;Kell blood group glycoprotein
KHDC3L;KH domain-containing protein 3
KHK;Ketohexokinase
KIAA0319;Dyslexia-associated protein KIAA0319
KIAA1549;UPF0606 protein KIAA1549
KIAA1549L;UPF0606 protein KIAA1549L
KIAA2013;Uncharacterized protein KIAA2013
KIF1C;Kinesin-like protein KIF1C
KIF20B;Kinesin-like protein KIF20B
KIF22;Kinesin-like protein KIF22
KIFBP;KIF-binding protein
KIR2DL2;Killer cell immunoglobulin-like receptor 2DL2
KIR2DL3;Killer cell immunoglobulin-like receptor 2DL3
KIR2DS4;Killer cell immunoglobulin-like receptor 2DS4
KIR3DL1;Killer cell immunoglobulin-like receptor 3DL1
KIR3DL2;Killer cell immunoglobulin-like receptor 3DL2
KIRREL1;Kin of IRRE-like protein 1
KIRREL2;Kin of IRRE-like protein 2
KIT;Mast/stem cell growth factor receptor Kit
KITLG;Kit ligand
KLB;Beta-klotho
KLF4;Krueppel-like factor 4
KLHL41;Kelch-like protein 41
KLK1;Kallikrein-1
KLK10;Kallikrein-10
KLK11;Kallikrein-11
KLK12;Kallikrein-12
KLK13;Kallikrein-13
KLK14;Kallikrein-14
KLK15;Kallikrein-15
KLK3;Prostate-specific antigen
KLK4;Kallikrein-4
KLK6;Kallikrein-6
KLK7;Kallikrein-7
KLK8;Kallikrein-8
KLKB1;Plasma kallikrein
KLRB1;Killer cell lectin-like receptor subfamily B member 1
KLRC1;NKG2-A/NKG2-B type II integral membrane protein
KLRD1;Natural killer cells antigen CD94
KLRF1;Killer cell lectin-like receptor subfamily F member 1
KLRK1;NKG2-D type II integral membrane protein
KRT14;Keratin, type I cytoskeletal 14
KRT17;Keratin, type I cytoskeletal 17
KRT18;Keratin, type I cytoskeletal 18
KRT19;Keratin, type I cytoskeletal 19
KRT5;Keratin, type II cytoskeletal 5
KRT6C;Keratin, type II cytoskeletal 6C
KRT8;Keratin, type II cytoskeletal 8
KYAT1;Kynurenine--oxoglutarate transaminase 1
KYNU;Kynureninase
L1CAM;Neural cell adhesion molecule L1
L3HYPDH;Trans-3-hydroxy-L-proline dehydratase
LACRT;Extracellular glycoprotein lacritin
LACTB2;Endoribonuclease LACTB2
LAG3;Lymphocyte activation gene 3 protein
LAIR1;Leukocyte-associated immunoglobulin-like receptor 1
LAIR2;Leukocyte-associated immunoglobulin-like receptor 2
LAMA1;Laminin subunit alpha-1
LAMA4;Laminin subunit alpha-4
LAMB1;Laminin subunit beta-1
LAMP1;Lysosome-associated membrane glycoprotein 1
LAMP2;Lysosome-associated membrane glycoprotein 2
LAMP3;Lysosome-associated membrane glycoprotein 3
LAMTOR5;Ragulator complex protein LAMTOR5
LAP3;Cytosol aminopeptidase
LARP1;La-related protein 1
LAT;Linker for activation of T-cells family member 1
LAT2;Linker for activation of T-cells family member 2
LATS1;Serine/threonine-protein kinase LATS1
LAYN;Layilin
LBP;Lipopolysaccharide-binding protein
LBR;Delta(14)-sterol reductase LBR
LCAT;Phosphatidylcholine-sterol acyltransferase
LCN15;Lipocalin-15
LCN2;Neutrophil gelatinase-associated lipocalin
LCP1;Plastin-2
LDLR;Low-density lipoprotein receptor
LDLRAP1;Low density lipoprotein receptor adapter protein 1
LECT2;Leukocyte cell-derived chemotaxin-2
LEFTY2;Left-right determination factor 2
LEG1;Protein LEG1 homolog
LELP1;Late cornified envelope-like proline-rich protein 1
LEO1;RNA polymerase-associated protein LEO1
LEP;Leptin
LEPR;Leptin receptor
LETM1;Mitochondrial proton/calcium exchanger protein
LGALS1;Galectin-1
LGALS3;Galectin-3
LGALS3BP;Galectin-3-binding protein
LGALS4;Galectin-4
LGALS7_LGALS7B;Galectin-7
LGALS8;Galectin-8
LGALS9;Galectin-9
LGMN;Legumain
LHB;Lutropin subunit beta
LHPP;Phospholysine phosphohistidine inorganic pyrophosphate phosphatase
LIF;Leukemia inhibitory factor
LIFR;Leukemia inhibitory factor receptor
LILRA2;Leukocyte immunoglobulin-like receptor subfamily A member 2
LILRA3;Leukocyte immunoglobulin-like receptor subfamily A member 3
LILRA4;Leukocyte immunoglobulin-like receptor subfamily A member 4
LILRA5;Leukocyte immunoglobulin-like receptor subfamily A member 5
LILRA6;Leukocyte immunoglobulin-like receptor subfamily A member 6
LILRB1;Leukocyte immunoglobulin-like receptor subfamily B member 1
LILRB2;Leukocyte immunoglobulin-like receptor subfamily B member 2
LILRB4;Leukocyte immunoglobulin-like receptor subfamily B member 4
LILRB5;Leukocyte immunoglobulin-like receptor subfamily B member 5
LIPF;Gastric triacylglycerol lipase
LMNB1;Lamin-B1
LMNB2;Lamin-B2
LMOD1;Leiomodin-1
LMOD2;Leiomodin-2
LONP1;Lon protease homolog, mitochondrial
LPA;Apolipoprotein(a)
LPCAT2;Lysophosphatidylcholine acyltransferase 2
LPL;Lipoprotein lipase
LPO;Lactoperoxidase
LPP;Lipoma-preferred partner
LRCH4;Leucine-rich repeat and calponin homology domain-containing protein 4
LRFN2;Leucine-rich repeat and fibronectin type-III domain-containing protein 2
LRG1;Leucine-rich alpha-2-glycoprotein
LRIG1;Leucine-rich repeats and immunoglobulin-like domains protein 1
LRIG3;Leucine-rich repeats and immunoglobulin-like domains protein 3
LRP1;Prolow-density lipoprotein receptor-related protein 1
LRP11;Low-density lipoprotein receptor-related protein 11
LRP2;Low-density lipoprotein receptor-related protein 2
LRP2BP;LRP2-binding protein
LRPAP1;Alpha-2-macroglobulin receptor-associated protein
LRRC25;Leucine-rich repeat-containing protein 25
LRRC37A2;Leucine-rich repeat-containing protein 37A2
LRRC38;Leucine-rich repeat-containing protein 38
LRRC59;Leucine-rich repeat-containing protein 59
LRRFIP1;Leucine-rich repeat flightless-interacting protein 1
LRRN1;Leucine-rich repeat neuronal protein 1
LRTM1;Leucine-rich repeat and transmembrane domain-containing protein 1
LRTM2;Leucine-rich repeat and transmembrane domain-containing protein 2
LSM1;U6 snRNA-associated Sm-like protein LSm1
LSM8;U6 snRNA-associated Sm-like protein LSm8
LSP1;Lymphocyte-specific protein 1
LTA;Lymphotoxin-alpha
LTA4H;Leukotriene A-4 hydrolase
LTB;Lymphotoxin-beta
LTBP2;Latent-transforming growth factor beta-binding protein 2
LTBP3;Latent-transforming growth factor beta-binding protein 3
LTBR;Tumor necrosis factor receptor superfamily member 3
LTO1;Protein LTO1 homolog
LUZP2;Leucine zipper protein 2
LXN;Latexin
LY6D;Lymphocyte antigen 6D
LY75;Lymphocyte antigen 75
LY9;T-lymphocyte surface antigen Ly-9
LY96;Lymphocyte antigen 96
LYAR;Cell growth-regulating nucleolar protein
LYN;Tyrosine-protein kinase Lyn
LYPD1;Ly6/PLAUR domain-containing protein 1
LYPD3;Ly6/PLAUR domain-containing protein 3
LYPD8;Ly6/PLAUR domain-containing protein 8
LYPLA2;Acyl-protein thioesterase 2
LYSMD3;LysM and putative peptidoglycan-binding domain-containing protein 3
LYVE1;Lymphatic vessel endothelial hyaluronic acid receptor 1
LYZL2;Lysozyme-like protein 2
LZTFL1;Leucine zipper transcription factor-like protein 1
M6PR;Cation-dependent mannose-6-phosphate receptor
MAD1L1;Mitotic spindle assembly checkpoint protein MAD1
MAEA;E3 ubiquitin-protein transferase MAEA
MAG;Myelin-associated glycoprotein
MAGEA3;Melanoma-associated antigen 3
MAGED1;Melanoma-associated antigen D1
MAMDC2;MAM domain-containing protein 2
MAMDC4;Apical endosomal glycoprotein
MAN1A2;Mannosyl-oligosaccharide 1,2-alpha-mannosidase IB
MAN2B2;Epididymis-specific alpha-mannosidase
MANEAL;Glycoprotein endo-alpha-1,2-mannosidase-like protein
MANF;Mesencephalic astrocyte-derived neurotrophic factor
MANSC1;MANSC domain-containing protein 1
MANSC4;MANSC domain-containing protein 4
MAP1LC3A;Microtubule-associated proteins 1A/1B light chain 3A
MAP1LC3B2;Microtubule-associated proteins 1A/1B light chain 3 beta 2
MAP2;Microtubule-associated protein 2
MAP2K1;Dual specificity mitogen-activated protein kinase kinase 1
MAP2K6;Dual specificity mitogen-activated protein kinase kinase 6
MAP3K5;Mitogen-activated protein kinase kinase kinase 5
MAP4K5;Mitogen-activated protein kinase kinase kinase kinase 5
MAPK13;Mitogen-activated protein kinase 13
MAPK9;Mitogen-activated protein kinase 9
MAPKAPK2;MAP kinase-activated protein kinase 2
MAPRE3;Microtubule-associated protein RP/EB family member 3
MAPT;Microtubule-associated protein tau
MARCO;Macrophage receptor MARCO
MARS1;Methionine--tRNA ligase, cytoplasmic
MASP1;Mannan-binding lectin serine protease 1
MATN2;Matrilin-2
MATN3;Matrilin-3
MAVS;Mitochondrial antiviral-signaling protein
MAX;Protein max
MB;Myoglobin
MBL2;Mannose-binding protein C
MCAM;Cell surface glycoprotein MUC18
MCEE;Methylmalonyl-CoA epimerase, mitochondrial
MCEMP1;Mast cell-expressed membrane protein 1
MCFD2;Multiple coagulation factor deficiency protein 2
MCTS1;Malignant T-cell-amplified sequence 1
MDGA1;MAM domain-containing glycosylphosphatidylinositol anchor protein 1
MDH1;Malate dehydrogenase, cytoplasmic
MDK;Midkine
MDM1;Nuclear protein MDM1
MECR;Enoyl-[acyl-carrier-protein] reductase, mitochondrial
MED18;Mediator of RNA polymerase II transcription subunit 18
MED21;Mediator of RNA polymerase II transcription subunit 21
MEGF10;Multiple epidermal growth factor-like domains protein 10
MEGF11;Multiple epidermal growth factor-like domains protein 11
MEGF9;Multiple epidermal growth factor-like domains protein 9
MELTF;Melanotransferrin
MENT;Protein MENT
MEP1A;Meprin A subunit alpha
MEP1B;Meprin A subunit beta
MEPE;Matrix extracellular phosphoglycoprotein
MERTK;Tyrosine-protein kinase Mer
MESD;LRP chaperone MESD
MET;Hepatocyte growth factor receptor
METAP1;Methionine aminopeptidase 1
METAP1D;Methionine aminopeptidase 1D, mitochondrial
METAP2;Methionine aminopeptidase 2
MFAP3;Microfibril-associated glycoprotein 3
MFAP3L;Microfibrillar-associated protein 3-like
MFAP4;Microfibril-associated glycoprotein 4
MFAP5;Microfibrillar-associated protein 5
MFGE8;Lactadherin
MGLL;Monoglyceride lipase
MGMT;Methylated-DNA--protein-cysteine methyltransferase
MIA;Melanoma-derived growth regulatory protein
MICALL2;MICAL-like protein 2
MICB_MICA;MHC class I polypeptide-related sequence A_MHC class I polypeptide-related sequence B
MIF;Macrophage migration inhibitory factor
MILR1;Allergin-1
MINDY1;Ubiquitin carboxyl-terminal hydrolase MINDY-1
MINK1;Misshapen-like kinase 1
MITD1;MIT domain-containing protein 1
MKI67;Proliferation marker protein Ki-67
MLLT1;Protein ENL
MLN;Promotilin
MME;Neprilysin
MMP1;Interstitial collagenase
MMP10;Stromelysin-2
MMP12;Macrophage metalloelastase
MMP13;Collagenase 3
MMP15;Matrix metalloproteinase-15
MMP3;Stromelysin-1
MMP7;Matrilysin
MMP8;Neutrophil collagenase
MMP9;Matrix metalloproteinase-9
MMUT;Methylmalonyl-CoA mutase, mitochondrial
MN1;Transcriptional activator MN1
MNAT1;CDK-activating kinase assembly factor MAT1
MNDA;Myeloid cell nuclear differentiation antigen
MOCS2;Molybdopterin synthase catalytic subunit
MOG;Myelin-oligodendrocyte glycoprotein
MORC3;MORC family CW-type zinc finger protein 3
MORF4L1;Mortality factor 4-like protein 1
MORF4L2;Mortality factor 4-like protein 2
MORN4;MORN repeat-containing protein 4
MPHOSPH8;M-phase phosphoprotein 8
MPI;Mannose-6-phosphate isomerase
MPIG6B;Megakaryocyte and platelet inhibitory receptor G6b
MPO;Myeloperoxidase
MPRIP;Myosin phosphatase Rho-interacting protein
MRC1;Macrophage mannose receptor 1
MRI1;Methylthioribose-1-phosphate isomerase
MRPL24;39S ribosomal protein L24, mitochondrial
MRPL28;39S ribosomal protein L28, mitochondrial
MRPL46;39S ribosomal protein L46, mitochondrial
MRPL52;39S ribosomal protein L52, mitochondrial
MRPL58;Peptidyl-tRNA hydrolase ICT1, mitochondrial
MRPS16;28S ribosomal protein S16, mitochondrial
MSLN;Mesothelin
MSLNL;Mesothelin-like protein
MSMB;Beta-microseminoprotein
MSR1;Macrophage scavenger receptor types I and II
MSRA;Mitochondrial peptide methionine sulfoxide reductase
MST1;Hepatocyte growth factor-like protein
MSTN;Growth/differentiation factor 8
MTDH;Protein LYRIC
MTHFD2;Bifunctional methylenetetrahydrofolate dehydrogenase/cyclohydrolase, mitochondrial
MTHFSD;Methenyltetrahydrofolate synthase domain-containing protein
MTIF3;Translation initiation factor IF-3, mitochondrial
MTPN;Myotrophin
MTR;Methionine synthase
MTSS1;Protein MTSS 1
MTSS2;Protein MTSS 2
MTUS1;Microtubule-associated tumor suppressor 1
MUC13;Mucin-13
MUC16;Mucin-16
MUC2;Mucin-2
MUCL3;Mucin-like protein 3
MVK;Mevalonate kinase
MXRA8;Matrix remodeling-associated protein 8
MYBPC1;Myosin-binding protein C, slow-type
MYBPC2;Myosin-binding protein C, fast-type
MYCBP2;E3 ubiquitin-protein ligase MYCBP2
MYDGF;Myeloid-derived growth factor
MYH4;Myosin-4
MYH7B;Myosin-7B
MYH9;Myosin-9
MYL1;Myosin light chain 1/3, skeletal muscle isoform
MYL3;Myosin light chain 3
MYL4;Myosin light chain 4
MYL6B;Myosin light chain 6B
MYLPF;Myosin regulatory light chain 2, skeletal muscle isoform
MYO6;Unconventional myosin-VI
MYO9B;Unconventional myosin-IXb
MYOC;Myocilin
MYOM1;Myomesin-1
MYOM2;Myomesin-2
MYOM3;Myomesin-3
MZB1;Marginal zone B- and B1-cell-specific protein
MZT1;Mitotic-spindle organizing protein 1
NAA10;N-alpha-acetyltransferase 10
NAA80;N-alpha-acetyltransferase 80
NAAA;N-acylethanolamine-hydrolyzing acid amidase
NACC1;Nucleus accumbens-associated protein 1
NADK;NAD kinase
NAGA;Alpha-N-acetylgalactosaminidase
NAGK;N-acetyl-D-glucosamine kinase
NAGPA;N-acetylglucosamine-1-phosphodiester alpha-N-acetylglucosaminidase
NAMPT;Nicotinamide phosphoribosyltransferase
NAP1L4;Nucleosome assembly protein 1-like 4
NAPRT;Nicotinate phosphoribosyltransferase
NARS1;Asparagine--tRNA ligase, cytoplasmic
NBL1;Neuroblastoma suppressor of tumorigenicity 1
NBN;Nibrin
NCAM1;Neural cell adhesion molecule 1
NCAM2;Neural cell adhesion molecule 2
NCAN;Neurocan core protein
NCF2;Neutrophil cytosol factor 2
NCK2;Cytoplasmic protein NCK2
NCLN;Nicalin
NCR1;Natural cytotoxicity triggering receptor 1
NCR3LG1;Natural cytotoxicity triggering receptor 3 ligand 1
NCS1;Neuronal calcium sensor 1
NDRG1;Protein NDRG1
NDST1;Bifunctional heparan sulfate N-deacetylase/N-sulfotransferase 1
NDUFA5;NADH dehydrogenase [ubiquinone] 1 alpha subcomplex subunit 5
NDUFB7;NADH dehydrogenase [ubiquinone] 1 beta subcomplex subunit 7
NDUFS6;NADH dehydrogenase [ubiquinone] iron-sulfur protein 6, mitochondrial
NEB;Nebulin
NECAP2;Adaptin ear-binding coat-associated protein 2
NECTIN1;Nectin-1
NECTIN2;Nectin-2
NECTIN4;Nectin-4
NEDD4L;E3 ubiquitin-protein ligase NEDD4-like
NEDD9;Enhancer of filamentation 1
NEFL;Neurofilament light polypeptide
NEK7;Serine/threonine-protein kinase Nek7
NELL1;Protein kinase C-binding protein NELL1
NELL2;Protein kinase C-binding protein NELL2
NENF;Neudesin
NEO1;Neogenin
NEXN;Nexilin
NFASC;Neurofascin
NFAT5;Nuclear factor of activated T-cells 5
NFATC1;Nuclear factor of activated T-cells, cytoplasmic 1
NFATC3;Nuclear factor of activated T-cells, cytoplasmic 3
NFE2;Transcription factor NF-E2 45 kDa subunit
NFIC;Nuclear factor 1 C-type
NFKB1;Nuclear factor NF-kappa-B p105 subunit
NFKB2;Nuclear factor NF-kappa-B p100 subunit
NFKBIE;NF-kappa-B inhibitor epsilon
NFU1;NFU1 iron-sulfur cluster scaffold homolog, mitochondrial
NFX1;Transcriptional repressor NF-X1
NFYA;Nuclear transcription factor Y subunit alpha
NGF;Beta-nerve growth factor
NGFR;Tumor necrosis factor receptor superfamily member 16
NGRN;Neugrin
NHLRC3;NHL repeat-containing protein 3
NID1;Nidogen-1
NID2;Nidogen-2
NINJ1;Ninjurin-1
NIT1;Deaminated glutathione amidase
NIT2;Omega-amidase NIT2
NLGN1;Neuroligin-1
NLGN2;Neuroligin-2
NME1;Nucleoside diphosphate kinase A
NME3;Nucleoside diphosphate kinase 3
NMI;N-myc-interactor
NMNAT1;Nicotinamide/nicotinic acid mononucleotide adenylyltransferase 1
NMRK2;Nicotinamide riboside kinase 2
NMT1;Glycylpeptide N-tetradecanoyltransferase 1
NOMO1;Nodal modulator 1
NOP56;Nucleolar protein 56
NOS1;Nitric oxide synthase, brain
NOS2;Nitric oxide synthase, inducible
NOS3;Nitric oxide synthase, endothelial
NOTCH1;Neurogenic locus notch homolog protein 1
NOTCH2;Neurogenic locus notch homolog protein 2
NOTCH3;Neurogenic locus notch homolog protein 3
NPC2;NPC intracellular cholesterol transporter 2
NPDC1;Neural proliferation differentiation and control protein 1
NPHS1;Nephrin
NPHS2;Podocin
NPL;N-acetylneuraminate lyase
NPM1;Nucleophosmin
NPPB;Natriuretic peptides B
NPPC;C-type natriuretic peptide
NPR1;Atrial natriuretic peptide receptor 1
NPTN;Neuroplastin
NPTX1;Neuronal pentraxin-1
NPTX2;Neuronal pentraxin-2
NPTXR;Neuronal pentraxin receptor
NPY;Pro-neuropeptide Y
NRCAM;Neuronal cell adhesion molecule
NRGN;Neurogranin
NRN1;Neuritin
NRP1;Neuropilin-1
NRP2;Neuropilin-2
NRTN;Neurturin
NRXN3;Neurexin-3
NSFL1C;NSFL1 cofactor p47
NT5C;5'(3')-deoxyribonucleotidase, cytosolic type
NT5C1A;Cytosolic 5'-nucleotidase 1A
NT5C3A;Cytosolic 5'-nucleotidase 3A
NT5E;5'-nucleotidase
NTF3;Neurotrophin-3
NTF4;Neurotrophin-4
NTproBNP;N-terminal prohormone of brain natriuretic peptide
NTRK2;BDNF/NT-3 growth factors receptor
NTRK3;NT-3 growth factor receptor
NUB1;NEDD8 ultimate buster 1
NUBP1;Cytosolic Fe-S cluster assembly factor NUBP1
NUCB2;Nucleobindin-2
NUDC;Nuclear migration protein nudC
NUDT10;Diphosphoinositol polyphosphate phosphohydrolase 3-alpha
NUDT15;Nucleotide triphosphate diphosphatase NUDT15
NUDT16;U8 snoRNA-decapping enzyme
NUDT2;Bis(5'-nucleosyl)-tetraphosphatase [asymmetrical]
NUDT5;ADP-sugar pyrophosphatase
NUMB;Protein numb homolog
NUP50;Nuclear pore complex protein Nup50
NXPE4;NXPE family member 4
NXPH1;Neurexophilin-1
NXPH3;Neurexophilin-3
OBP2B;Odorant-binding protein 2b
OCLN;Occludin
ODAM;Odontogenic ameloblast-associated protein
OFD1;Oral-facial-digital syndrome 1 protein
OGA;Protein O-GlcNAcase
OGFR;Opioid growth factor receptor
OGN;Mimecan
OGT;UDP-N-acetylglucosamine--peptide N-acetylglucosaminyltransferase 110 kDa subunit
OLFM4;Olfactomedin-4
OLR1;Oxidized low-density lipoprotein receptor 1
OMD;Osteomodulin
OMG;Oligodendrocyte-myelin glycoprotein
OMP;Olfactory marker protein
OPHN1;Oligophrenin-1
OPLAH;5-oxoprolinase
OPTC;Opticin
ORM1;Alpha-1-acid glycoprotein 1
OSBPL2;Oxysterol-binding protein-related protein 2
OSCAR;Osteoclast-associated immunoglobulin-like receptor
OSM;Oncostatin-M
OSMR;Oncostatin-M-specific receptor subunit beta
OSTN;Osteocrin
OTOA;Otoancorin
OTUD6B;Deubiquitinase OTUD6B
OTUD7B;OTU domain-containing protein 7B
OXCT1;Succinyl-CoA:3-ketoacid coenzyme A transferase 1, mitochondrial
OXT;Oxytocin-neurophysin 1
P4HB;Protein disulfide-isomerase
PACS2;Phosphofurin acidic cluster sorting protein 2
PADI2;Protein-arginine deiminase type-2
PADI4;Protein-arginine deiminase type-4
PAEP;Glycodelin
PAFAH1B3;Platelet-activating factor acetylhydrolase IB subunit alpha1
PAFAH2;Platelet-activating factor acetylhydrolase 2, cytoplasmic
PAG1;Phosphoprotein associated with glycosphingolipid-enriched microdomains 1
PAGR1;PAXIP1-associated glutamate-rich protein 1
PAIP2B;Polyadenylate-binding protein-interacting protein 2B
PAK4;Serine/threonine-protein kinase PAK 4
PALLD;Palladin
PALM;Paralemmin-1
PALM2;Paralemmin-2
PALM3;Paralemmin-3
PAM;Peptidyl-glycine alpha-amidating monooxygenase
PAMR1;Inactive serine protease PAMR1
PAPPA;Pappalysin-1
PARD3;Partitioning defective 3 homolog
PARK7;Parkinson disease protein 7
PARP1;Poly [ADP-ribose] polymerase 1
PAXX;Protein PAXX
PBK;Lymphokine-activated killer T-cell-originated protein kinase
PBLD;Phenazine biosynthesis-like domain-containing protein
PBXIP1;Pre-B-cell leukemia transcription factor-interacting protein 1
PCARE;Photoreceptor cilium actin regulator
PCBD1;Pterin-4-alpha-carbinolamine dehydratase
PCBP2;Poly(rC)-binding protein 2
PCDH1;Protocadherin-1
PCDH12;Protocadherin-12
PCDH17;Protocadherin-17
PCDH7;Protocadherin-7
PCDH9;Protocadherin-9
PCDHB15;Protocadherin beta-15
PCNA;Proliferating cell nuclear antigen
PCOLCE;Procollagen C-endopeptidase enhancer 1
PCSK7;Proprotein convertase subtilisin/kexin type 7
PCSK9;Proprotein convertase subtilisin/kexin type 9
PCYT2;Ethanolamine-phosphate cytidylyltransferase
PDAP1;28 kDa heat- and acid-stable phosphoprotein
PDCD1;Programmed cell death protein 1
PDCD1LG2;Programmed cell death 1 ligand 2
PDCD5;Programmed cell death protein 5
PDCD6;Programmed cell death protein 6
[truncated: 924 more rows]

## Sheet: Metabolomics
NMR
Glucose-lactate
Spectrometer-corrected alanine
Total Cholesterol
Total Cholesterol Minus HDL-C
Remnant Cholesterol (Non-HDL, Non-LDL -Cholesterol)
VLDL Cholesterol
Clinical LDL Cholesterol
LDL Cholesterol
HDL Cholesterol
Total Triglycerides
Triglycerides in VLDL
Triglycerides in LDL
Triglycerides in HDL
Total Phospholipids in Lipoprotein Particles
Phospholipids in VLDL
Phospholipids in LDL
Phospholipids in HDL
Total Esterified Cholesterol
Cholesteryl Esters in VLDL
Cholesteryl Esters in LDL
Cholesteryl Esters in HDL
Total Free Cholesterol
Free Cholesterol in VLDL
Free Cholesterol in LDL
Free Cholesterol in HDL
Total Lipids in Lipoprotein Particles
Total Lipids in VLDL
Total Lipids in LDL
Total Lipids in HDL
Total Concentration of Lipoprotein Particles
Concentration of VLDL Particles
Concentration of LDL Particles
Concentration of HDL Particles
Average Diameter for VLDL Particles
Average Diameter for LDL Particles
Average Diameter for HDL Particles
Phosphoglycerides
Triglycerides to Phosphoglycerides ratio
Total Cholines
Phosphatidylcholines
Sphingomyelins
Apolipoprotein B
Apolipoprotein A1
Apolipoprotein B to Apolipoprotein A1 ratio
Total Fatty Acids
Degree of Unsaturation
Omega-3 Fatty Acids
Omega-6 Fatty Acids
Polyunsaturated Fatty Acids
Monounsaturated Fatty Acids
Saturated Fatty Acids
Linoleic Acid
Docosahexaenoic Acid
Omega-3 Fatty Acids to Total Fatty Acids percentage
Omega-6 Fatty Acids to Total Fatty Acids percentage
Polyunsaturated Fatty Acids to Total Fatty Acids percentage
Monounsaturated Fatty Acids to Total Fatty Acids percentage
Saturated Fatty Acids to Total Fatty Acids percentage
Linoleic Acid to Total Fatty Acids percentage
Docosahexaenoic Acid to Total Fatty Acids percentage
Polyunsaturated Fatty Acids to Monounsaturated Fatty Acids ratio
Omega-6 Fatty Acids to Omega-3 Fatty Acids ratio
Alanine
Glutamine
Glycine
Histidine
Total Concentration of Branched-Chain Amino Acids (Leucine + Isoleucine + Valine)
Isoleucine
Leucine
Valine
Phenylalanine
Tyrosine
Glucose
Lactate
Pyruvate
Citrate
3-Hydroxybutyrate
Acetate
Acetoacetate
Acetone
Creatinine
Albumin
Glycoprotein Acetyls
Concentration of Chylomicrons and Extremely Large VLDL Particles
Total Lipids in Chylomicrons and Extremely Large VLDL
Phospholipids in Chylomicrons and Extremely Large VLDL
Cholesterol in Chylomicrons and Extremely Large VLDL
Cholesteryl Esters in Chylomicrons and Extremely Large VLDL
Free Cholesterol in Chylomicrons and Extremely Large VLDL
Triglycerides in Chylomicrons and Extremely Large VLDL
Concentration of Very Large VLDL Particles
Total Lipids in Very Large VLDL
Phospholipids in Very Large VLDL
Cholesterol in Very Large VLDL
Cholesteryl Esters in Very Large VLDL
Free Cholesterol in Very Large VLDL
Triglycerides in Very Large VLDL
Concentration of Large VLDL Particles
Total Lipids in Large VLDL
Phospholipids in Large VLDL
Cholesterol in Large VLDL
Cholesteryl Esters in Large VLDL
Free Cholesterol in Large VLDL
Triglycerides in Large VLDL
Concentration of Medium VLDL Particles
Total Lipids in Medium VLDL
Phospholipids in Medium VLDL
Cholesterol in Medium VLDL
Cholesteryl Esters in Medium VLDL
Free Cholesterol in Medium VLDL
Triglycerides in Medium VLDL
Concentration of Small VLDL Particles
Total Lipids in Small VLDL
Phospholipids in Small VLDL
Cholesterol in Small VLDL
Cholesteryl Esters in Small VLDL
Free Cholesterol in Small VLDL
Triglycerides in Small VLDL
Concentration of Very Small VLDL Particles
Total Lipids in Very Small VLDL
Phospholipids in Very Small VLDL
Cholesterol in Very Small VLDL
Cholesteryl Esters in Very Small VLDL
Free Cholesterol in Very Small VLDL
Triglycerides in Very Small VLDL
Concentration of IDL Particles
Total Lipids in IDL
Phospholipids in IDL
Cholesterol in IDL
Cholesteryl Esters in IDL
Free Cholesterol in IDL
Triglycerides in IDL
Concentration of Large LDL Particles
Total Lipids in Large LDL
Phospholipids in Large LDL
Cholesterol in Large LDL
Cholesteryl Esters in Large LDL
Free Cholesterol in Large LDL
Triglycerides in Large LDL
Concentration of Medium LDL Particles
Total Lipids in Medium LDL
Phospholipids in Medium LDL
Cholesterol in Medium LDL
Cholesteryl Esters in Medium LDL
Free Cholesterol in Medium LDL
Triglycerides in Medium LDL
Concentration of Small LDL Particles
Total Lipids in Small LDL
Phospholipids in Small LDL
Cholesterol in Small LDL
Cholesteryl Esters in Small LDL
Free Cholesterol in Small LDL
Triglycerides in Small LDL
Concentration of Very Large HDL Particles
Total Lipids in Very Large HDL
Phospholipids in Very Large HDL
Cholesterol in Very Large HDL
Cholesteryl Esters in Very Large HDL
Free Cholesterol in Very Large HDL
Triglycerides in Very Large HDL
Concentration of Large HDL Particles
Total Lipids in Large HDL
Phospholipids in Large HDL
Cholesterol in Large HDL
Cholesteryl Esters in Large HDL
Free Cholesterol in Large HDL
Triglycerides in Large HDL
Concentration of Medium HDL Particles
Total Lipids in Medium HDL
Phospholipids in Medium HDL
Cholesterol in Medium HDL
Cholesteryl Esters in Medium HDL
Free Cholesterol in Medium HDL
Triglycerides in Medium HDL
Concentration of Small HDL Particles
Total Lipids in Small HDL
Phospholipids in Small HDL
Cholesterol in Small HDL
Cholesteryl Esters in Small HDL
Free Cholesterol in Small HDL
Triglycerides in Small HDL
Phospholipids to Total Lipids in Chylomicrons and Extremely Large VLDL percentage
Cholesterol to Total Lipids in Chylomicrons and Extremely Large VLDL percentage
Cholesteryl Esters to Total Lipids in Chylomicrons and Extremely Large VLDL percentage
Free Cholesterol to Total Lipids in Chylomicrons and Extremely Large VLDL percentage
Triglycerides to Total Lipids in Chylomicrons and Extremely Large VLDL percentage
Phospholipids to Total Lipids in Very Large VLDL percentage
Cholesterol to Total Lipids in Very Large VLDL percentage
Cholesteryl Esters to Total Lipids in Very Large VLDL percentage
Free Cholesterol to Total Lipids in Very Large VLDL percentage
Triglycerides to Total Lipids in Very Large VLDL percentage
Phospholipids to Total Lipids in Large VLDL percentage
Cholesterol to Total Lipids in Large VLDL percentage
Cholesteryl Esters to Total Lipids in Large VLDL percentage
Free Cholesterol to Total Lipids in Large VLDL percentage
Triglycerides to Total Lipids in Large VLDL percentage
Phospholipids to Total Lipids in Medium VLDL percentage
Cholesterol to Total Lipids in Medium VLDL percentage
Cholesteryl Esters to Total Lipids in Medium VLDL percentage
Free Cholesterol to Total Lipids in Medium VLDL percentage
Triglycerides to Total Lipids in Medium VLDL percentage
Phospholipids to Total Lipids in Small VLDL percentage
Cholesterol to Total Lipids in Small VLDL percentage
Cholesteryl Esters to Total Lipids in Small VLDL percentage
Free Cholesterol to Total Lipids in Small VLDL percentage
Triglycerides to Total Lipids in Small VLDL percentage
Phospholipids to Total Lipids in Very Small VLDL percentage
Cholesterol to Total Lipids in Very Small VLDL percentage
Cholesteryl Esters to Total Lipids in Very Small VLDL percentage
Free Cholesterol to Total Lipids in Very Small VLDL percentage
Triglycerides to Total Lipids in Very Small VLDL percentage
Phospholipids to Total Lipids in IDL percentage
Cholesterol to Total Lipids in IDL percentage
Cholesteryl Esters to Total Lipids in IDL percentage
Free Cholesterol to Total Lipids in IDL percentage
Triglycerides to Total Lipids in IDL percentage
Phospholipids to Total Lipids in Large LDL percentage
Cholesterol to Total Lipids in Large LDL percentage
Cholesteryl Esters to Total Lipids in Large LDL percentage
Free Cholesterol to Total Lipids in Large LDL percentage
Triglycerides to Total Lipids in Large LDL percentage
Phospholipids to Total Lipids in Medium LDL percentage
Cholesterol to Total Lipids in Medium LDL percentage
Cholesteryl Esters to Total Lipids in Medium LDL percentage
Free Cholesterol to Total Lipids in Medium LDL percentage
Triglycerides to Total Lipids in Medium LDL percentage
Phospholipids to Total Lipids in Small LDL percentage
Cholesterol to Total Lipids in Small LDL percentage
Cholesteryl Esters to Total Lipids in Small LDL percentage
Free Cholesterol to Total Lipids in Small LDL percentage
Triglycerides to Total Lipids in Small LDL percentage
Phospholipids to Total Lipids in Very Large HDL percentage
Cholesterol to Total Lipids in Very Large HDL percentage
Cholesteryl Esters to Total Lipids in Very Large HDL percentage
Free Cholesterol to Total Lipids in Very Large HDL percentage
Triglycerides to Total Lipids in Very Large HDL percentage
Phospholipids to Total Lipids in Large HDL percentage
Cholesterol to Total Lipids in Large HDL percentage
Cholesteryl Esters to Total Lipids in Large HDL percentage
Free Cholesterol to Total Lipids in Large HDL percentage
Triglycerides to Total Lipids in Large HDL percentage
Phospholipids to Total Lipids in Medium HDL percentage
Cholesterol to Total Lipids in Medium HDL percentage
Cholesteryl Esters to Total Lipids in Medium HDL percentage
Free Cholesterol to Total Lipids in Medium HDL percentage
Triglycerides to Total Lipids in Medium HDL percentage
Phospholipids to Total Lipids in Small HDL percentage
Cholesterol to Total Lipids in Small HDL percentage
Cholesteryl Esters to Total Lipids in Small HDL percentage
Free Cholesterol to Total Lipids in Small HDL percentage
Triglycerides to Total Lipids in Small HDL percentage

## Sheet: Disease diagnosis records
Field ID	Description
41270	Diagnoses - ICD10
41280	Date of first in-patient diagnosis - ICD10

## Sheet: Environmental factors
Field ID	Description
22189	Townsend deprivation index at recruitment
24019	Particulate matter air pollution (pm10); 2007
24006	Particulate matter air pollution (pm2.5); 2010

## Sheet: Telomeres
Field ID	Description
22191	Adjusted T/S ratio
22194	T/S ratio for regression dilution bias
22193	Telomere measurement plate
22190	Unadjusted T/S ratio
22192	Z-adjusted T/S log

## Sheet: Lifestyles
Field ID	Description
1458	Cereal intake
1289	Cooked vegetable intake
1438	Bread intake
1319	Dried fruit intake
1160	Sleep duration
20116	Smoking status
1329	Oily fish intake
22036	At or above moderate/vigorous/walking recommendation
1339	Non-oily fish intake
1031	Frequency of friend/family visits
1379	Lamb/mutton intake
1389	Pork intake
1558	Alcohol intake frequency
1369	Beef intake
1448	Bread type
1349	Processed meat intake
864	Number of days/week walked 10+ minutes

## Sheet: Physical measures
Field ID	Description
49	Hip circumference
21001	Body mass index (BMI)
48	Waist circumference
