# Supplementary material
Source: Research Square preprint supplement (doi:10.21203/rs.3.rs-9402213/v1)
Supplement: Supplementary file 3 [file 5b024c9aa2613c784cdbaff5.xlsx]

## Sheet: TA and TD
ICD-10	Tumor_acceleration (TA)	Tumor_deviation (TD)	Chronological_age	Cancer_type	Size (tumor before sampling)	Size (tumor after sampling)
C01	9.04139	29.7465	55.2	C00-C14 Malignant neoplasms of lip, oral cavity and pharynx	5	11
C02	7.29637	36.3806	54.25	C00-C14 Malignant neoplasms of lip, oral cavity and pharynx	8	11
C03	-8.74928	31.9177	63.5	C00-C14 Malignant neoplasms of lip, oral cavity and pharynx	2	2
C04	2.26707	43.8311	56.5	C00-C14 Malignant neoplasms of lip, oral cavity and pharynx	2	4
C05	1.15965	25.3026	63	C00-C14 Malignant neoplasms of lip, oral cavity and pharynx	3	1
C06	25.7893	23.3362	62.3333	C00-C14 Malignant neoplasms of lip, oral cavity and pharynx	3	5
C07	2.63548	26.1866	63.5	C00-C14 Malignant neoplasms of lip, oral cavity and pharynx	4	5
C08	-4.14374	32.5285	67.5	C00-C14 Malignant neoplasms of lip, oral cavity and pharynx	2	1
C09	-4.56552	36.6686	60.5	C00-C14 Malignant neoplasms of lip, oral cavity and pharynx	2	23
C11	-7.39678	8.2713	64	C00-C14 Malignant neoplasms of lip, oral cavity and pharynx	1	1
C12	1.25364	37.2187	64.3333	C00-C14 Malignant neoplasms of lip, oral cavity and pharynx	3	2
C15	2.81634	33.2307	59.0769	C15-C26 Malignant neoplasms of digestive organs	13	76
C16	-0.707891	34.6179	63.7	C15-C26 Malignant neoplasms of digestive organs	10	52
C17	-6.51364	25.3834	62.5	C15-C26 Malignant neoplasms of digestive organs	2	16
C18	4.78066	30.1205	63.3158	C15-C26 Malignant neoplasms of digestive organs	95	275
C19	2.00174	29.3445	63.0769	C15-C26 Malignant neoplasms of digestive organs	13	23
C20	5.75152	31.2039	62.4068	C15-C26 Malignant neoplasms of digestive organs	59	105
C21	10.751	40.8604	61	C15-C26 Malignant neoplasms of digestive organs	1	17
C22	2.01334	37.0893	57.6667	C15-C26 Malignant neoplasms of digestive organs	3	43
C23	3.77799	26.0454	63	C15-C26 Malignant neoplasms of digestive organs	1	9
C24	-4.29708	53.9509	61	C15-C26 Malignant neoplasms of digestive organs	2	20
C25	20.3423	25.9899	46.5	C15-C26 Malignant neoplasms of digestive organs	2	86
C26	-10.1615	27.651	57.6667	C15-C26 Malignant neoplasms of digestive organs	3	3
C30	-47.9656	39.6634	62	C30-C39 Malignant neoplasms of respiratory and intrathoracic organs	1	3
C31	2.93398	38.15	57	C30-C39 Malignant neoplasms of respiratory and intrathoracic organs	1	1
C32	6.67906	25.8364	62.6364	C30-C39 Malignant neoplasms of respiratory and intrathoracic organs	22	14
C33	-10.3611	44.3061	49	C30-C39 Malignant neoplasms of respiratory and intrathoracic organs	1	NA
C34	8.00245	29.3061	61.1724	C30-C39 Malignant neoplasms of respiratory and intrathoracic organs	29	312
C37	25.8803	26.7568	64	C30-C39 Malignant neoplasms of respiratory and intrathoracic organs	1	3
C40	19.8348	36.2122	53	C40-C41 Malignant neoplasms of bone and articular cartilage	4	3
C41	8.20639	19.8088	58.5	C40-C41 Malignant neoplasms of bone and articular cartilage	2	NA
C42	5.90251	31.4923	60.6667	C42 hematopoietic and reticuloendothelial systems (ICD-O-3 specific)	3	NA
C43	2.05362	28.093	58.4552	C43-C44 Melanoma and other malignant neoplasms of skin	145	203
C44	3.07604	28.9748	61.5741	C43-C44 Melanoma and other malignant neoplasms of skin	749	1806
C46	15.9602	24.9266	63	C45-C49 Malignant neoplasms of mesothelial and soft tissue	1	NA
C47	27.1131	45.3995	60	C45-C49 Malignant neoplasms of mesothelial and soft tissue	1	1
C48	12.3545	26.3562	63.5	C45-C49 Malignant neoplasms of mesothelial and soft tissue	2	11
C49	6.19651	28.2531	61.2308	C45-C49 Malignant neoplasms of mesothelial and soft tissue	13	22
C50	-0.0510587	29.0217	59.8729	C50-C50 Malignant neoplasm of breast	606	637
C51	23.2117	21.9582	57	C51-C58 Malignant neoplasms of female genital organs	4	11
C52	27.3432	77.257	59	C51-C58 Malignant neoplasms of female genital organs	1	NA
C53	1.84997	28.0375	56.125	C51-C58 Malignant neoplasms of female genital organs	32	5
C54	2.87437	27.9386	61.7922	C51-C58 Malignant neoplasms of female genital organs	77	108
C55	-0.644553	41.5193	57.5	C51-C58 Malignant neoplasms of female genital organs	2	1
C56	5.5791	30.6768	57.8478	C51-C58 Malignant neoplasms of female genital organs	46	70
C57	-16.6226	42.8442	65	C51-C58 Malignant neoplasms of female genital organs	1	11
C58	16.4478	12.7011	53	C51-C58 Malignant neoplasms of female genital organs	1	NA
C60	-20.5925	44.4881	64	C60-C63 Malignant neoplasms of male genital organs	1	3
C61	3.65999	29.7049	64.1464	C60-C63 Malignant neoplasms of male genital organs	239	833
C62	3.06923	28.0129	54.6829	C60-C63 Malignant neoplasms of male genital organs	41	7
C64	7.4192	33.4572	61.4359	C64-C68 Malignant neoplasms of urinary tract	39	102
C65	-10.8845	18.2399	68	C64-C68 Malignant neoplasms of urinary tract	1	7
C66	38.0931	26.3285	67	C64-C68 Malignant neoplasms of urinary tract	1	5
C67	4.18215	29.8698	62.9677	C64-C68 Malignant neoplasms of urinary tract	31	72
C69	-7.48944	28.3759	59.3333	C69-C72 Malignant neoplasms of eye, brain and other parts of central nervous system	6	9
C70	8.67894	34.6994	66	C69-C72 Malignant neoplasms of eye, brain and other parts of central nervous system	1	NA
C71	13.7942	23.0932	52.4286	C69-C72 Malignant neoplasms of eye, brain and other parts of central nervous system	7	51
C72	-11.6232	29.863	66	C69-C72 Malignant neoplasms of eye, brain and other parts of central nervous system	1	1
C73	0.622458	32.5011	59.129	C73-C75 Malignant neoplasms of thyroid and other endocrine glands	31	35
C74	13.7332	27.6372	59	C73-C75 Malignant neoplasms of thyroid and other endocrine glands	1	5
C76	-10.1681	20.4404	58.6667	C76-C80 Malignant neoplasms of ill-defined, secondary and unspecified sites	3	2
C77	-1.29628	28.252	65.6667	C76-C80 Malignant neoplasms of ill-defined, secondary and unspecified sites	3	12
C78	22.3193	39.6213	58	C76-C80 Malignant neoplasms of ill-defined, secondary and unspecified sites	3	14
C79	7.72356	15.5556	60	C76-C80 Malignant neoplasms of ill-defined, secondary and unspecified sites	1	7
C80	8.37782	26.7349	56.3333	C76-C80 Malignant neoplasms of ill-defined, secondary and unspecified sites	3	19
C81	6.07842	28.2646	54.08	C81-C96 Malignant neoplasms, stated or presumed to be primary, of lymphoid, haematopoietic and related tissue	25	17
C82	6.69967	28.0578	56.2353	C81-C96 Malignant neoplasms, stated or presumed to be primary, of lymphoid, haematopoietic and related tissue	17	27
C83	16.4376	32.3319	56.2069	C81-C96 Malignant neoplasms, stated or presumed to be primary, of lymphoid, haematopoietic and related tissue	29	70
C84	-5.18208	28.6175	56.7778	C81-C96 Malignant neoplasms, stated or presumed to be primary, of lymphoid, haematopoietic and related tissue	9	13
C85	9.73592	27.9239	60.8333	C81-C96 Malignant neoplasms, stated or presumed to be primary, of lymphoid, haematopoietic and related tissue	18	36
C88	7.15689	48.6563	53	C81-C96 Malignant neoplasms, stated or presumed to be primary, of lymphoid, haematopoietic and related tissue	2	6
C90	20.4592	27.4535	62.8571	C81-C96 Malignant neoplasms, stated or presumed to be primary, of lymphoid, haematopoietic and related tissue	14	65
C91	7.81644	35.0274	61.4	C81-C96 Malignant neoplasms, stated or presumed to be primary, of lymphoid, haematopoietic and related tissue	25	54
C92	10.1875	28.9898	56.125	C81-C96 Malignant neoplasms, stated or presumed to be primary, of lymphoid, haematopoietic and related tissue	16	22
C96	-13.1095	42.3029	58.5	C81-C96 Malignant neoplasms, stated or presumed to be primary, of lymphoid, haematopoietic and related tissue	2	5
D00	-1.01277	40.3796	66	D00-D09 In situ neoplasms	2	16
D01	4.00448	32.3836	59.75	D00-D09 In situ neoplasms	4	48
D02	4.30513	30.599	64.25	D00-D09 In situ neoplasms	4	2
D03	0.344597	29.3982	59.5581	D00-D09 In situ neoplasms	43	92
D04	2.19437	28.7134	63.2308	D00-D09 In situ neoplasms	65	47
D05	2.56452	30.749	59.2745	D00-D09 In situ neoplasms	102	106
D06	0.463331	29.4285	52.7534	D00-D09 In situ neoplasms	296	20
D07	5.69296	28.1676	60.2903	D00-D09 In situ neoplasms	31	42
D09	2.94504	27.5535	60.5294	D00-D09 In situ neoplasms	17	79
D11	15.6953	33.4591	57.3333	D10-D36 Benign neoplasms	3	NA
D18	-3.99304	30.5657	60	D10-D36 Benign neoplasms	1	NA
D32	3.12365	28.4343	57.5909	D10-D36 Benign neoplasms	22	31
D33	-1.59928	29.1416	53.5385	D10-D36 Benign neoplasms	13	14
D35	14.8432	39.4227	56.3333	D10-D36 Benign neoplasms	12	16
D36	-32.9408	61.6327	68	D10-D36 Benign neoplasms	1	NA
D37	-1.01937	27.0484	59.6	D37-D48 Neoplasms of uncertain or unknown behaviour	20	14
D38	19.0727	26.1611	64	D37-D48 Neoplasms of uncertain or unknown behaviour	1	1
D39	3.45873	30.8197	55.9	D37-D48 Neoplasms of uncertain or unknown behaviour	10	6
D40	13.2394	32.4633	59	D37-D48 Neoplasms of uncertain or unknown behaviour	2	3
D41	8.13132	30.1309	63.0312	D37-D48 Neoplasms of uncertain or unknown behaviour	32	41
D42	-3.97272	32.7453	66	D37-D48 Neoplasms of uncertain or unknown behaviour	1	2
D43	-7.03297	22.411	61.75	D37-D48 Neoplasms of uncertain or unknown behaviour	4	2
D44	-7.78351	36.0809	55.25	D37-D48 Neoplasms of uncertain or unknown behaviour	4	2
D45	5.11493	31.4037	54	D37-D48 Neoplasms of uncertain or unknown behaviour	8	6
D46	-0.894248	37.1522	66.3333	D37-D48 Neoplasms of uncertain or unknown behaviour	3	18
D47	6.95551	39.7739	61.85	D37-D48 Neoplasms of uncertain or unknown behaviour	20	33
D48	0.910567	28.086	53	D37-D48 Neoplasms of uncertain or unknown behaviour	14	16
