# Supplementary material
Source: Research Square preprint supplement (doi:10.21203/rs.3.rs-9402213/v1)
Supplement: Supplementary file 4 [file 63ccef6b0535966108f75a92.xlsx]

## Sheet: proteomics+metabolomics
	Internal		External
Methods	UKB PCC	UKB std	NSPT PCC	NSPT CI	VPPG PCC	VPPG CI
VAM	0.8352	0.0078	0.6583	[0.627, 0.689]	0.8670	[0.816, 0.907]
MLP	0.7773	0.0022	0.1714	[0.112, 0.228]	0.7657	[0.703, 0.823]
ResNet	0.7487	0.0381	0.1100	[0.039, 0.163]	0.8129	[0.764, 0.847]
Attention	0.7989	0.0675	0.0505	[-0.038, 0.093]	0.6967	[0.650, 0.738]
LASSO	0.7986	0.0105	0.2563	[0.187, 0.304]	0.7850	[0.736, 0.840]
RF	0.438	0.0292	0.1299	[0.077, 0.190]	0.5823	[0.435, 0.650]
SVM	0.4034	0.02	0.3674	[0.302, 0.433]	0.6893	[0.600, 0.757]
DT	0.1895	0.0396	0.1139	[0.071, 0.176]	0.3299	[0.177, 0.451]

## Sheet: proteomics
	Internal		External
Methods	UKB PCC	UKB std	NSPT PCC	NSPT CI	VPPG PCC	VPPG CI
VAM	0.8142	0.0121	0.6582	[0.635, 0.703]	0.8510	[0.793, 0.880]
MLP	0.6552	0.0329	0.1730	[0.089, 0.218]	0.6624	[0.599, 0.721]
ResNet	0.7135	0.0124	0.0183	[-0.052, 0.073]	0.6493	[0.570, 0.713]
Attention	0.4964	0.0215	0.0776	[-0.01, 0.111]	0.3752	[0.231, 0.509]
LASSO	0.7845	0.01	0.2676	[0.213, 0.322]	0.7702	[0.723, 0.813]
RF	0.4273	0.0214	0.125	[0.065, 0.180]	0.5447	[0.457, 0.624]
SVM	0.4111	0.0177	0.3588	[0.299, 0.426]	0.7019	[0.635, 0.788]
DT	0.182	0.013	0.1139	[0.047, 0.172]	0.3221	[0.154, 0.464]
