# Supplementary material
Source: Research Square preprint supplement (doi:10.21203/rs.3.rs-9402213/v1)
Supplement: Supplementary file 6 [file f06a588889c27775b26fbceb.xlsx]

## Sheet: GO (44.5-year peak)
	ONTOLOGY	ID	Description	GeneRatio	BgRatio	pvalue	p.adjust	qvalue	geneID	Count
GO:0045296	MF	GO:0045296	cadherin binding	23/321	333/18432	2.2451068979382e-08	1.29767178700828e-05	1.09419420394251e-05	28988/11315/79026/4179/8428/5770/4627/51031/682/7430/11344/10890/3190/53827/9101/9208/10190/7408/2802/57488/8650/26058/1956	23
GO:0043281	BP	GO:0043281	regulation of cysteine-type endopeptidase activity involved in apoptotic process	18/321	205/18903	1.44343424652747e-08	2.45807864171955e-05	1.90043619070873e-05	51024/9141/3965/637/11315/10935/25824/4102/1509/5329/581/27074/10049/4255/4217/356/1800/4137	18
GO:2000116	BP	GO:2000116	regulation of cysteine-type endopeptidase activity	19/321	235/18903	2.1918611585096e-08	2.45807864171955e-05	1.90043619070873e-05	51024/1471/9141/3965/637/11315/10935/25824/4102/1509/5329/581/27074/10049/4255/4217/356/1800/4137	19
GO:0052548	BP	GO:0052548	regulation of endopeptidase activity	26/321	428/18903	2.23337498959539e-08	2.45807864171955e-05	1.90043619070873e-05	51024/1471/9141/3965/637/11315/10935/25824/5269/4102/5037/1509/5329/581/1476/10406/27074/1992/10049/4255/4217/1474/356/1800/2043/4137	26
GO:0052547	BP	GO:0052547	regulation of peptidase activity	27/321	459/18903	2.32058403749781e-08	2.45807864171955e-05	1.90043619070873e-05	51024/1471/9141/3965/637/11315/10935/25824/5269/4102/5037/1509/5329/581/51035/1476/10406/27074/1992/10049/4255/4217/1474/356/1800/2043/4137	27
GO:0050731	BP	GO:0050731	positive regulation of peptidyl-tyrosine phosphorylation	17/321	193/18903	3.4919212761969e-08	2.95905408944926e-05	2.28775979189995e-05	8764/7132/958/5770/972/7040/54209/10464/9244/3815/11009/2322/3565/1956/4254/4908/2043	17
GO:1990778	BP	GO:1990778	protein localization to cell periphery	22/321	337/18903	8.020039267383e-08	5.66348439598363e-05	4.37866003510454e-05	7132/6810/7040/682/5064/54209/7430/9135/10890/9693/26003/8673/2533/9482/208/163882/8650/57120/481/7369/1956/483	22
GO:0005788	CC	GO:0005788	endoplasmic reticulum lumen	20/324	312/19869	2.25160476316016e-07	5.73576247246955e-05	4.61555483865536e-05	5034/1622/1471/23071/51246/4043/5329/56005/2923/3487/10970/1075/5479/1286/3486/56955/8614/2322/338/11093	20
GO:0030667	CC	GO:0030667	secretory granule membrane	20/324	313/19869	2.37014978201221e-07	5.73576247246955e-05	4.61555483865536e-05	4179/5269/5329/967/682/3903/10159/945/10970/27074/10890/8773/8673/9342/3382/683/6402/762/57126/1363	20
GO:0072659	BP	GO:0072659	protein localization to plasma membrane	20/321	285/18903	9.83580842883683e-08	5.95347433042595e-05	4.6028625309083e-05	7132/6810/7040/682/5064/54209/7430/10890/9693/26003/8673/2533/9482/208/163882/8650/57120/481/1956/483	20
GO:0005925	CC	GO:0005925	focal adhesion	23/324	422/19869	5.02521676282965e-07	8.1073497106985e-05	6.52396562191919e-05	5034/79026/4179/950/5329/4627/5604/5501/2923/10971/682/7430/10890/3190/8773/5094/7408/8650/4659/5479/23332/1956/6204	23
GO:0030055	CC	GO:0030055	cell-substrate junction	23/324	432/19869	7.54009044506752e-07	9.12350943853171e-05	7.34166701230259e-05	5034/79026/4179/950/5329/4627/5604/5501/2923/10971/682/7430/10890/3190/8773/5094/7408/8650/4659/5479/23332/1956/6204	23
GO:0097193	BP	GO:0097193	intrinsic apoptotic signaling pathway	20/321	298/18903	2.02732105849073e-07	0.000107371991560315	8.30134622897782e-05	5034/51024/8678/142/60401/7132/51246/637/11315/8428/4102/5770/5329/581/972/8795/7917/54209/3190/4217	20
GO:0005769	CC	GO:0005769	early endosome	22/324	414/19869	1.36059448572518e-06	0.000131705546218197	0.000105983149414382	28988/10935/5770/5604/51019/6272/27074/84868/9135/9101/51160/8673/8546/150684/1992/9482/208/8650/10617/1956/338/2043	22
GO:0042581	CC	GO:0042581	specific granule	13/324	160/19869	2.32046886767701e-06	0.000187184488659279	0.000150626926498332	23071/6810/1509/5329/3903/945/10970/311/8773/8673/4790/683/57126	13
GO:0043410	BP	GO:0043410	positive regulation of MAPK cascade	26/321	496/18903	4.05968914768821e-07	0.000191121143541721	0.000147763188626967	60401/3965/59/958/5770/5604/972/56005/7040/9518/4055/284340/54209/3487/84868/9693/4217/3815/3486/84432/2322/1956/4254/4908/2043/23236	26
GO:0034976	BP	GO:0034976	response to endoplasmic reticulum stress	18/321	261/18903	5.60050584138405e-07	0.000224934637802671	0.000173905716020996	5034/23071/11315/4102/5770/581/8795/51035/7917/2923/29761/26003/7353/79982/4217/8614/7369/5923	18
GO:0070661	BP	GO:0070661	leukocyte proliferation	21/321	348/18903	5.83970029697754e-07	0.000224934637802671	0.000173905716020996	8764/8379/3965/637/6480/4179/7048/958/581/972/54209/80381/84868/683/3575/3815/2322/3565/51083/4254/79679	21
GO:0050730	BP	GO:0050730	regulation of peptidyl-tyrosine phosphorylation	18/321	266/18903	7.38475838502528e-07	0.000260743510644601	0.000201590948194725	8764/7132/958/5770/972/7040/54209/10464/683/9244/3815/11009/2322/3565/1956/4254/4908/2043	18
GO:0043202	CC	GO:0043202	lysosomal lumen	10/324	98/19869	4.55779516772265e-06	0.000315138980168252	0.000253591610835696	10577/950/2720/1509/972/1515/63827/338/3423/356	10
GO:1905475	BP	GO:1905475	regulation of protein localization to membrane	14/321	172/18903	1.48302245430795e-06	0.000458603234190349	0.000354563995081019	51024/9141/6810/7040/54209/7430/8673/23184/9482/208/163882/8650/57120/1956	14
GO:0097191	BP	GO:0097191	extrinsic apoptotic signaling pathway	16/321	224/18903	1.51532812807762e-06	0.000458603234190349	0.000354563995081019	7132/6810/637/11315/10413/581/8795/7040/2923/4055/6272/6789/2309/3565/4254/356	16
GO:0032943	BP	GO:0032943	mononuclear cell proliferation	19/321	312/18903	1.77383111910098e-06	0.000501048163442056	0.000387379820536297	8764/8379/3965/637/6480/4179/7048/958/581/972/80381/84868/683/3575/2322/3565/51083/4254/79679	19
GO:0030136	CC	GO:0030136	clathrin-coated vesicle	14/324	211/19869	1.01639980241053e-05	0.000614921880458373	0.000494826219594602	1211/28988/950/972/10159/6272/8673/8546/143187/8650/57120/3575/1956/338	14
GO:0042470	CC	GO:0042470	melanosome	10/324	110/19869	1.28464259475396e-05	0.000621767015860917	0.000500334484272596	5034/191/1509/967/2923/682/311/5479/483/6509	10
GO:0048770	CC	GO:0048770	pigment granule	10/324	110/19869	1.28464259475396e-05	0.000621767015860917	0.000500334484272596	5034/191/1509/967/2923/682/311/5479/483/6509	10
GO:0045861	BP	GO:0045861	negative regulation of proteolysis	20/321	352/18903	2.74349952363786e-06	0.00070893228902824	0.000548103122481369	1471/11315/10935/25824/5269/4102/5037/5329/51035/1476/7917/10406/27074/29761/1992/10049/1474/8473/1800/2043	20
GO:0072594	BP	GO:0072594	establishment of protein localization to organelle	23/321	449/18903	2.84442976480531e-06	0.00070893228902824	0.000548103122481369	51024/8678/9141/9804/637/5534/950/137492/581/7040/7917/6272/27074/10890/6789/51160/8546/93974/22930/5903/3842/4137/347	23
GO:0070820	CC	GO:0070820	tertiary granule	12/324	164/19869	1.65342732762451e-05	0.000717829829677832	0.000577636009092644	1471/28988/5269/1509/1476/4048/3903/10159/945/8773/8673/57126	12
GO:0005765	CC	GO:0005765	lysosomal membrane	20/324	418/19869	1.92805532764707e-05	0.000717829829677832	0.000577636009092644	1211/51374/79026/950/1509/23557/972/8763/967/10159/6272/10970/27074/9550/8673/8546/9482/9342/23118/57120	20
GO:0098852	CC	GO:0098852	lytic vacuole membrane	20/324	418/19869	1.92805532764707e-05	0.000717829829677832	0.000577636009092644	1211/51374/79026/950/1509/23557/972/8763/967/10159/6272/10970/27074/9550/8673/8546/9482/9342/23118/57120	20
GO:0002274	BP	GO:0002274	myeloid leukocyte activation	16/321	237/18903	3.16004162986765e-06	0.000729481398500619	0.000563990438153591	6810/3965/7048/972/26762/4055/54209/945/1075/84868/8773/8673/3815/3565/57126/4137	16
GO:0016032	BP	GO:0016032	viral process	22/321	421/18903	3.41116647184124e-06	0.000729481398500619	0.000563990438153591	5034/8764/3965/6480/4179/950/137492/972/9525/26762/682/27074/6741/54737/51160/8673/5094/7812/6733/5479/10241/1956	22
GO:0009141	BP	GO:0009141	nucleoside triphosphate metabolic process	17/321	267/18903	3.4433863511948e-06	0.000729481398500619	0.000563990438153591	79077/51024/6390/142/11164/4726/4698/7040/1841/54209/3704/4713/93974/204/8473/481/3565	17
GO:0070663	BP	GO:0070663	regulation of leukocyte proliferation	17/321	269/18903	3.80648950628358e-06	0.000768004573243978	0.000593774202684437	8764/8379/3965/637/6480/4179/7048/958/972/80381/84868/683/3815/3565/51083/4254/79679	17
GO:0090150	BP	GO:0090150	establishment of protein localization to membrane	17/321	270/18903	4.00065551662659e-06	0.000770489882906675	0.000595695692236456	51024/9141/9804/637/137492/581/7917/10890/26003/8546/208/163882/57120/481/7369/1956/22930	17
GO:0032944	BP	GO:0032944	regulation of mononuclear cell proliferation	16/321	243/18903	4.35841918391176e-06	0.000802896612271049	0.000620750594980933	8764/8379/3965/637/6480/4179/7048/958/972/80381/84868/683/3565/51083/4254/79679	16
GO:0005774	CC	GO:0005774	vacuolar membrane	21/324	461/19869	2.4766632299214e-05	0.000856217859487113	0.000688996537647308	1211/51374/79026/950/1509/23557/972/8763/967/10159/6272/10970/27074/9550/8673/8546/9482/9342/23118/57120/10241	21
GO:0099170	BP	GO:0099170	postsynaptic modulation of chemical synaptic transmission	5/321	16/18903	5.12715788161569e-06	0.000864580051552995	0.000668440460711506	5534/9101/1977/1630/23236	5
GO:0046651	BP	GO:0046651	lymphocyte proliferation	18/321	305/18903	5.15231079982383e-06	0.000864580051552995	0.000668440460711506	8764/8379/3965/637/4179/7048/958/581/972/80381/84868/683/3575/2322/3565/51083/4254/79679	18
GO:0050867	BP	GO:0050867	positive regulation of cell activation	23/321	467/18903	5.45095562238917e-06	0.000864580051552995	0.000668440460711506	8764/6810/3965/4179/7048/59/958/972/7040/26762/54209/80381/1075/84868/8673/8546/2309/683/3575/3565/4254/79679/57126	23
GO:0010822	BP	GO:0010822	positive regulation of mitochondrion organization	9/321	76/18903	5.50947873304953e-06	0.000864580051552995	0.000668440460711506	400916/51024/9141/637/11315/5329/581/54209/93974	9
GO:0070665	BP	GO:0070665	positive regulation of leukocyte proliferation	13/321	167/18903	5.75604586257833e-06	0.000868133042286407	0.000671187416020595	3965/6480/4179/7048/958/972/80381/84868/683/3815/3565/4254/79679	13
GO:0062012	BP	GO:0062012	regulation of small molecule metabolic process	19/321	339/18903	5.94190659105636e-06	0.000868133042286407	0.000671187416020595	51024/142/11315/10447/972/23413/54209/3487/208/93974/2308/10464/4790/8473/3815/3486/3565/338/5903	19
GO:0006457	BP	GO:0006457	protein folding	15/321	223/18903	6.7146400777981e-06	0.000930030270838375	0.000719042570549923	5034/9141/23071/10294/972/2923/11140/6902/23184/10049/134218/79982/5479/7369/5903	15
GO:2001233	BP	GO:2001233	regulation of apoptotic signaling pathway	20/321	374/18903	6.80456417181723e-06	0.000930030270838375	0.000719042570549923	5034/51024/8678/142/6810/637/11315/10413/4102/5770/5329/581/972/2923/4055/54209/1075/6789/3190/3565	20
GO:2001242	BP	GO:2001242	regulation of intrinsic apoptotic signaling pathway	13/321	172/18903	7.94294068983009e-06	0.00105169499071282	0.000813106296932607	5034/51024/8678/142/637/11315/4102/5770/5329/581/972/54209/3190	13
GO:0032946	BP	GO:0032946	positive regulation of mononuclear cell proliferation	12/321	149/18903	9.31538954384314e-06	0.00115549810344231	0.000893360520207314	3965/6480/4179/7048/958/972/80381/84868/683/3565/4254/79679	12
GO:2000377	BP	GO:2000377	regulation of reactive oxygen species metabolic process	12/321	149/18903	9.31538954384314e-06	0.00115549810344231	0.000893360520207314	8678/11315/7048/7040/2309/2308/683/5446/7020/4314/57126/4137	12
GO:0019058	BP	GO:0019058	viral life cycle	18/321	319/18903	9.5450633987446e-06	0.00115549810344231	0.000893360520207314	5034/8764/3965/4179/950/137492/972/9525/26762/682/27074/54737/51160/8673/5094/6733/5479/1956	18
GO:0002696	BP	GO:0002696	positive regulation of leukocyte activation	22/321	450/18903	9.82043366136858e-06	0.0011558104839783	0.000893602033747924	8764/6810/3965/4179/7048/958/972/7040/26762/54209/80381/1075/84868/8673/8546/2309/683/3575/3565/4254/79679/57126	22
GO:1903076	BP	GO:1903076	regulation of protein localization to plasma membrane	10/321	103/18903	1.01281511729094e-05	0.00115981017620587	0.000896694351354028	6810/7040/54209/7430/8673/9482/163882/8650/57120/1956	10
GO:0010466	BP	GO:0010466	negative regulation of peptidase activity	16/321	263/18903	1.18421729114985e-05	0.00132040227963208	0.00102085435181671	1471/11315/10935/25824/5269/4102/5037/5329/51035/1476/10406/27074/1992/10049/1474/1800	16
GO:0072593	BP	GO:0072593	reactive oxygen species metabolic process	15/321	235/18903	1.25901808945988e-05	0.00136781016539526	0.00105750723195659	8678/11315/10935/25824/7048/7040/93974/2309/2308/683/5446/7020/4314/57126/4137	15
GO:0008625	BP	GO:0008625	extrinsic apoptotic signaling pathway via death domain receptors	9/321	85/18903	1.39309810637764e-05	0.00147563916918052	0.00114087402817032	7132/6810/637/11315/581/8795/6272/6789/356	9
GO:0033674	BP	GO:0033674	positive regulation of kinase activity	23/321	496/18903	1.44309186942651e-05	0.00149131225628296	0.00115299150132357	11315/7048/958/5770/5604/972/8795/7040/54209/9693/6789/23118/10464/4217/3815/2322/3565/1956/4254/4908/5903/2043/4137	23
GO:0050670	BP	GO:0050670	regulation of lymphocyte proliferation	15/321	239/18903	1.5379102470729e-05	0.0015514585040114	0.00119949290448393	8764/8379/3965/637/4179/7048/958/972/80381/84868/683/3565/51083/4254/79679	15
GO:0030139	CC	GO:0030139	endocytic vesicle	17/324	343/19869	5.26245766488385e-05	0.0016355171792178	0.00131609690367679	1211/8678/6810/950/972/2923/81035/9135/10890/9693/311/8773/8673/9482/3575/1956/338	17
GO:0030135	CC	GO:0030135	coated vesicle	16/324	310/19869	5.40666836105059e-05	0.0016355171792178	0.00131609690367679	1211/28988/950/972/10159/6272/1075/22872/8673/8546/143187/8650/57120/3575/1956/338	16
GO:0042531	BP	GO:0042531	positive regulation of tyrosine phosphorylation of STAT protein	8/321	67/18903	1.73067214653719e-05	0.00170531578718095	0.00131844595349419	7132/958/10464/9244/3815/11009/2322/3565	8
GO:0009205	BP	GO:0009205	purine ribonucleoside triphosphate metabolic process	15/321	242/18903	1.7816905857971e-05	0.00171568704818689	0.00132646437870827	51024/6390/142/11164/4726/4698/7040/54209/3704/4713/93974/204/8473/481/3565	15
GO:0030665	CC	GO:0030665	clathrin-coated vesicle membrane	10/324	132/19869	6.23662385046919e-05	0.00177560349625123	0.00142882404004557	1211/28988/950/972/10159/8673/8546/3575/1956/338	10
GO:0070997	BP	GO:0070997	neuron death	19/321	368/18903	1.88955335978502e-05	0.00177911946342426	0.00137550644576632	142/637/11315/581/4747/54209/4149/208/6733/2309/10617/4217/9244/1630/4908/356/7020/4137/148811	19
GO:0042177	BP	GO:0042177	negative regulation of protein catabolic process	10/321	111/18903	1.96346143962754e-05	0.00180851872167432	0.00139823615563407	1471/51374/11315/51035/7917/27074/29761/23077/8473/1956	10
GO:0048678	BP	GO:0048678	response to axon injury	9/321	89/18903	2.02675622582093e-05	0.00182709917634112	0.00141260142771663	8428/5604/581/4747/54209/4149/56963/2043/347	9
GO:0030175	CC	GO:0030175	filopodium	9/324	108/19869	6.93449646493878e-05	0.00186460904946132	0.00150044660352476	59/5064/9936/7430/11344/7408/4254/10381/2043	9
GO:0046034	BP	GO:0046034	ATP metabolic process	14/321	217/18903	2.17391766562849e-05	0.00191893523943081	0.00148360345952541	51024/6390/142/11164/4726/4698/7040/54209/4713/93974/204/8473/481/3565	14
GO:0009144	BP	GO:0009144	purine nucleoside triphosphate metabolic process	15/321	247/18903	2.26460075676649e-05	0.00192920667254821	0.00149154470391663	51024/6390/142/11164/4726/4698/7040/54209/3704/4713/93974/204/8473/481/3565	15
GO:0051346	BP	GO:0051346	negative regulation of hydrolase activity	19/321	373/18903	2.27661868367738e-05	0.00192920667254821	0.00149154470391663	1471/11315/10935/25824/5269/4102/5037/5329/51035/1476/10406/6272/27074/1992/93974/10049/1474/9734/1800	19
GO:0051881	BP	GO:0051881	regulation of mitochondrial membrane potential	8/321	70/18903	2.39690810913052e-05	0.00197680112174352	0.0015283418235012	142/637/11315/10935/581/208/93974/4137	8
GO:2000117	BP	GO:2000117	negative regulation of cysteine-type endopeptidase activity	9/321	91/18903	2.42609531108481e-05	0.00197680112174352	0.0015283418235012	1471/11315/10935/25824/4102/5329/27074/10049/1800	9
GO:0009199	BP	GO:0009199	ribonucleoside triphosphate metabolic process	15/321	249/18903	2.4880451794652e-05	0.00198902781611208	0.00153779475640431	51024/6390/142/11164/4726/4698/7040/54209/3704/4713/93974/204/8473/481/3565	15
GO:0062197	BP	GO:0062197	cellular response to chemical stress	18/321	345/18903	2.72858399062749e-05	0.00214092784597938	0.00165523457677051	5034/8678/142/6810/11315/10935/25824/5269/8428/54209/10725/2309/2308/4255/4217/1956/4314/4137	18
GO:0010951	BP	GO:0010951	negative regulation of endopeptidase activity	15/321	252/18903	2.85974700357202e-05	0.00216266652576876	0.00167204159551629	1471/11315/10935/25824/5269/4102/5037/5329/1476/10406/27074/1992/10049/1474/1800	15
GO:0022411	BP	GO:0022411	cellular component disassembly	22/321	483/18903	2.91257710255885e-05	0.00216266652576876	0.00167204159551629	51024/1471/8678/11315/23557/581/9525/7040/54209/11344/11140/8673/219402/93974/9342/10241/1515/23332/8473/4314/2043/5650	22
GO:0018108	BP	GO:0018108	peptidyl-tyrosine phosphorylation	19/321	380/18903	2.93758850491523e-05	0.00216266652576876	0.00167204159551629	8764/7132/958/5770/5604/972/7040/54209/10464/683/9244/3815/11009/2322/3565/1956/4254/4908/2043	19
GO:0007159	BP	GO:0007159	leukocyte cell-cell adhesion	20/321	414/18903	2.9604592517014e-05	0.00216266652576876	0.00167204159551629	8764/8379/3965/4179/7048/972/2650/80381/7430/84868/10725/8546/2309/3575/6402/3565/7369/4254/79679/57126	20
GO:0043406	BP	GO:0043406	positive regulation of MAP kinase activity	10/321	117/18903	3.10681215864275e-05	0.00222834932966499	0.00172282352556239	958/5770/7040/4217/3815/2322/1956/4254/4908/2043	10
GO:0018212	BP	GO:0018212	peptidyl-tyrosine modification	19/321	382/18903	3.15555722869717e-05	0.00222834932966499	0.00172282352556239	8764/7132/958/5770/5604/972/7040/54209/10464/683/9244/3815/11009/2322/3565/1956/4254/4908/2043	19
GO:0016236	BP	GO:0016236	macroautophagy	17/321	317/18903	3.22804893552062e-05	0.00224124184606271	0.00173279123136955	8678/1509/3964/137492/23557/9525/11140/9550/9779/51160/8673/9342/143187/10241/8473/3565/22930	17
GO:0051402	BP	GO:0051402	neuron apoptotic process	15/321	255/18903	3.27960808250856e-05	0.00224124184606271	0.00173279123136955	142/637/11315/581/4747/54209/4149/208/6733/2309/10617/9244/4908/356/7020	15
GO:0034599	BP	GO:0034599	cellular response to oxidative stress	16/321	288/18903	3.60415041068707e-05	0.00242393417302875	0.00187403777411164	5034/8678/142/6810/11315/10935/25824/8428/54209/2309/2308/4255/4217/1956/4314/4137	16
GO:0016050	BP	GO:0016050	vesicle organization	18/321	353/18903	3.68604657510051e-05	0.00242924677241574	0.00187814515130064	6810/950/137492/23557/9525/10159/6272/9101/22872/8773/51160/8673/8546/9482/208/9342/143187/356	18
GO:0002275	BP	GO:0002275	myeloid cell activation involved in immune response	9/321	96/18903	3.72671796570741e-05	0.00242924677241574	0.00187814515130064	6810/3965/54209/84868/8773/8673/3815/3565/57126	9
GO:0030662	CC	GO:0030662	coated vesicle membrane	12/324	198/19869	0.000104230340993523	0.00259740333389397	0.0020901244748603	1211/28988/950/972/10159/22872/8673/8546/143187/3575/1956/338	12
GO:0031225	CC	GO:0031225	anchored component of membrane	11/324	169/19869	0.00010733071627661	0.00259740333389397	0.0020901244748603	5329/683/63827/84966/7369/419/762/56963/8000/1800/57126	11
GO:0050671	BP	GO:0050671	positive regulation of lymphocyte proliferation	11/321	146/18903	4.07732740445259e-05	0.00261752063828267	0.00202370699882878	3965/4179/7048/958/972/80381/84868/683/3565/4254/79679	11
GO:0035579	CC	GO:0035579	specific granule membrane	8/324	91/19869	0.000120440096742537	0.0027223290633187	0.00219065192133084	5329/3903/945/10970/8773/8673/683/57126	8
GO:0031201	CC	GO:0031201	SNARE complex	6/324	48/19869	0.00012374223015085	0.0027223290633187	0.00219065192133084	6810/8773/8673/9482/9342/143187	6
GO:0042176	BP	GO:0042176	regulation of protein catabolic process	18/321	361/18903	4.93146266531526e-05	0.00311859810640907	0.00241110947595618	1471/51374/11315/51035/7917/54209/7430/27074/29761/9101/51160/150684/23077/2308/5887/8473/1956/56963	18
GO:0005775	CC	GO:0005775	vacuolar lumen	11/324	176/19869	0.000153734634634987	0.00323511144188407	0.00260328671921945	10577/950/2720/1509/972/1075/1515/63827/338/3423/356	11
GO:0043154	BP	GO:0043154	negative regulation of cysteine-type endopeptidase activity involved in apoptotic process	8/321	78/18903	5.29346195296116e-05	0.00329829386686712	0.00255003925659677	11315/10935/25824/4102/5329/27074/10049/1800	8
GO:0051117	MF	GO:0051117	ATPase binding	9/321	85/18432	1.69829203403918e-05	0.00336271821428279	0.00283543713934244	8192/51035/7430/29761/9550/93974/481/1956/483	9
GO:0008429	MF	GO:0008429	phosphatidylethanolamine binding	4/321	10/18432	1.74535547454124e-05	0.00336271821428279	0.00283543713934244	5037/54209/311/57488	4
GO:1904375	BP	GO:1904375	regulation of protein localization to cell periphery	10/321	125/18903	5.48298300467629e-05	0.00336686941895847	0.00260305768276928	6810/7040/54209/7430/8673/9482/163882/8650/57120/1956	10
GO:1905477	BP	GO:1905477	positive regulation of protein localization to membrane	9/321	101/18903	5.57415153961724e-05	0.00337395429619404	0.00260853527688554	51024/9141/6810/54209/7430/23184/208/163882/1956	9
GO:0070821	CC	GO:0070821	tertiary granule membrane	7/324	73/19869	0.000186277094792811	0.00375658807832169	0.00302291776637456	5269/3903/10159/945/8773/8673/57126	7
GO:0006163	BP	GO:0006163	purine nucleotide metabolic process	21/321	476/18903	6.98162026371874e-05	0.0040890042925408	0.00316136823680781	84836/51024/6390/142/11164/4726/4698/7040/30833/23413/54209/84618/3704/4713/93974/51292/204/8473/481/3565/4881	21
GO:0006892	BP	GO:0006892	post-Golgi vesicle-mediated transport	9/321	104/18903	7.01506498196324e-05	0.0040890042925408	0.00316136823680781	10067/6272/9135/10890/8773/150684/163882/143187/57120	9
GO:0098760	BP	GO:0098760	response to interleukin-7	4/321	14/18903	7.14152272003821e-05	0.0040890042925408	0.00316136823680781	5034/2923/5887/3575	4
GO:0098761	BP	GO:0098761	cellular response to interleukin-7	4/321	14/18903	7.14152272003821e-05	0.0040890042925408	0.00316136823680781	5034/2923/5887/3575	4
GO:0042509	BP	GO:0042509	regulation of tyrosine phosphorylation of STAT protein	8/321	82/18903	7.58810616320645e-05	0.00428677410846743	0.00331427177261733	7132/958/10464/9244/3815/11009/2322/3565	8
GO:1903039	BP	GO:1903039	positive regulation of leukocyte cell-cell adhesion	15/321	275/18903	7.74800243407253e-05	0.00431951135699544	0.00333958221258085	8764/3965/4179/7048/972/2650/80381/84868/10725/8546/2309/3575/3565/4254/79679	15
GO:0019902	MF	GO:0019902	phosphatase binding	13/321	195/18432	3.92088750182366e-05	0.00453895782751084	0.00382723998203883	5534/5770/5501/945/1075/2029/8546/4087/163882/2308/4217/1956/4137	13
GO:0005484	MF	GO:0005484	SNAP receptor activity	6/321	37/18432	3.92643410684329e-05	0.00453895782751084	0.00382723998203883	6810/8773/8673/9482/9342/143187	6
GO:0031902	CC	GO:0031902	late endosome membrane	10/324	155/19869	0.000235915717634255	0.00456732829339917	0.00367531854840734	950/137492/9525/967/27074/51160/8673/9482/143187/129531	10
GO:0004869	MF	GO:0004869	cysteine-type endopeptidase inhibitor activity	7/321	56/18432	5.07693865891207e-05	0.00470776798242603	0.00396958036034102	1471/10935/25824/1476/10406/1474/1800	7
GO:0005035	MF	GO:0005035	death receptor activity	4/321	13/18432	5.70144911366474e-05	0.00470776798242603	0.00396958036034102	8764/60401/7132/8795	4
GO:0009150	BP	GO:0009150	purine ribonucleotide metabolic process	20/321	447/18903	8.57618212188657e-05	0.00471912774680953	0.0036485411843214	84836/51024/6390/142/11164/4726/4698/7040/30833/54209/84618/3704/4713/93974/51292/204/8473/481/3565/4881	20
GO:0045785	BP	GO:0045785	positive regulation of cell adhesion	21/321	484/18903	8.83099971084188e-05	0.00479704433010731	0.00370878152498514	5034/8764/6810/3965/4179/7048/5329/972/9289/2650/80381/84868/10725/6789/8546/2309/3575/3565/4254/79679/2043	21
GO:0070059	BP	GO:0070059	intrinsic apoptotic signaling pathway in response to endoplasmic reticulum stress	7/321	63/18903	9.34077734784944e-05	0.00500973083833393	0.00387321773571052	11315/4102/5770/581/8795/7917/4217	7
GO:0005770	CC	GO:0005770	late endosome	14/324	288/19869	0.00029101043594022	0.00541727119211795	0.00435926563959034	950/137492/5604/972/9525/967/27074/9693/51160/8673/9482/143187/129531/1956	14
GO:0007260	BP	GO:0007260	tyrosine phosphorylation of STAT protein	8/321	86/18903	0.000106534336754913	0.00558141237792013	0.00431520696622174	7132/958/10464/9244/3815/11009/2322/3565	8
GO:0008631	BP	GO:0008631	intrinsic apoptotic signaling pathway in response to oxidative stress	6/321	45/18903	0.000106701534720682	0.00558141237792013	0.00431520696622174	5034/142/11315/8428/54209/4217	6
GO:0045860	BP	GO:0045860	positive regulation of protein kinase activity	19/321	420/18903	0.000111531262275865	0.00576290193003463	0.00445552359695111	11315/7048/958/5770/5604/8795/7040/9693/6789/23118/10464/4217/3815/2322/3565/1956/4254/4908/2043	19
GO:0031983	CC	GO:0031983	vesicle lumen	15/324	327/19869	0.000331668231685385	0.00594546015317505	0.00478429807889249	23071/28988/10577/2720/1509/10447/7040/1476/1075/1992/9535/4790/1956/338/356	15
GO:1904019	BP	GO:1904019	epithelial cell apoptotic process	10/321	137/18903	0.000118542593749447	0.00605138517730612	0.00467856121430919	637/10413/7048/958/581/6789/2309/4217/3565/356	10
GO:1990090	BP	GO:1990090	cellular response to nerve growth factor stimulus	6/321	46/18903	0.000120972204411771	0.00610189559634133	0.00471761278357682	6272/9693/9101/2309/4908/4137	6
GO:1903051	BP	GO:1903051	negative regulation of proteolysis involved in protein catabolic process	7/321	66/18903	0.000125894962807287	0.0062754936166409	0.00485182816416444	11315/51035/7917/27074/29761/8473/2043	7
GO:0022409	BP	GO:0022409	positive regulation of cell-cell adhesion	16/321	322/18903	0.000134026584668299	0.00660314696790213	0.00510514971221232	8764/3965/4179/7048/5329/972/2650/80381/84868/10725/8546/2309/3575/3565/4254/79679	16
GO:0051087	MF	GO:0051087	chaperone binding	9/321	105/18432	9.14705858557624e-05	0.00660874982807883	0.00557248437516026	950/10294/581/1075/11140/6902/10049/10910/4137	9
GO:0097028	BP	GO:0097028	dendritic cell differentiation	6/321	47/18903	0.000136715741250596	0.00665821374343419	0.00514772397788088	3965/7048/4055/54209/2322/3565	6
GO:0005802	CC	GO:0005802	trans-Golgi network	13/324	262/19869	0.000391672658162799	0.00677034166252839	0.00544807832782841	1211/8678/10067/6810/84661/972/2650/10890/9482/163882/143187/27236/762	13
GO:1901214	BP	GO:1901214	regulation of neuron death	16/321	325/18903	0.000149057578990465	0.00714542202201785	0.00552440364521062	142/11315/581/4747/54209/6733/2309/10617/4217/9244/1630/4908/356/7020/4137/148811	16
GO:0009259	BP	GO:0009259	ribonucleotide metabolic process	20/321	466/18903	0.000150092650450694	0.00714542202201785	0.00552440364521062	84836/51024/6390/142/11164/4726/4698/7040/30833/54209/84618/3704/4713/93974/51292/204/8473/481/3565/4881	20
GO:1990089	BP	GO:1990089	response to nerve growth factor	6/321	48/18903	0.000154039194031633	0.0072518229456892	0.00560666633715136	6272/9693/9101/2309/4908/4137	6
GO:0071902	BP	GO:0071902	positive regulation of protein serine/threonine kinase activity	13/321	229/18903	0.000155901379143738	0.00725461887549211	0.00560882797921355	958/5770/5604/7040/9693/6789/4217/3815/2322/1956/4254/4908/2043	13
GO:1901216	BP	GO:1901216	positive regulation of neuron death	8/321	91/18903	0.000158589679223074	0.00725461887549211	0.00560882797921355	142/581/6733/2309/4217/356/7020/4137	8
GO:0002699	BP	GO:0002699	positive regulation of immune effector process	14/321	261/18903	0.00015923520307311	0.00725461887549211	0.00560882797921355	8764/6810/3965/4179/958/972/7040/54209/8673/3815/3565/4049/57126/5650	14
GO:2001267	BP	GO:2001267	regulation of cysteine-type endopeptidase activity involved in apoptotic signaling pathway	4/321	17/18903	0.000163093248957629	0.00735134144503697	0.00568360795919533	3965/11315/5329/581	4
GO:0050900	BP	GO:0050900	leukocyte migration	18/321	398/18903	0.000169062889411081	0.00751119170762496	0.00580719441365636	8764/3965/4627/972/682/284340/54209/2650/5479/683/3815/6402/3565/7369/4254/57126/347/23236	18
GO:0006979	BP	GO:0006979	response to oxidative stress	19/321	434/18903	0.000170185131916922	0.00751119170762496	0.00580719441365636	5034/8678/142/6810/11315/10935/475/25824/8428/54209/2309/2308/4255/4217/8614/1956/4314/4137/347	19
GO:0051656	BP	GO:0051656	establishment of organelle localization	19/321	437/18903	0.000185809001731414	0.00811621381789692	0.006274960535954	8678/8379/3965/4001/4627/23557/10540/9525/4747/7430/8773/8673/8546/9342/10464/23332/3815/3565/4137	19
GO:0009895	BP	GO:0009895	negative regulation of catabolic process	16/321	332/18903	0.000189969703192686	0.00821328196354502	0.00635000769426036	1471/8678/51374/11315/4102/51035/7917/54209/27074/29761/7812/1153/23077/23118/8473/1956	16
GO:0019693	BP	GO:0019693	ribose phosphate metabolic process	20/321	475/18903	0.000193276453440604	0.00827184174977616	0.00639528254234088	84836/51024/6390/142/11164/4726/4698/7040/30833/54209/84618/3704/4713/93974/51292/204/8473/481/3565/4881	20
GO:1901799	BP	GO:1901799	negative regulation of proteasomal protein catabolic process	6/321	51/18903	0.000216624355049898	0.00917837392346419	0.00709615782016087	11315/51035/7917/27074/29761/8473	6
GO:0030427	CC	GO:0030427	site of polarized growth	10/324	173/19869	0.00056507482046322	0.00943090390014477	0.00758902662691075	28988/10540/4747/11344/1630/91653/5923/10381/2043/4137	10
GO:0045862	BP	GO:0045862	positive regulation of proteolysis	17/321	372/18903	0.000226171236110553	0.00948799532079619	0.0073355381633772	51024/9141/3965/637/1509/4627/581/7917/54209/1075/93974/4217/8473/56963/356/2043/4137	17
GO:0048015	BP	GO:0048015	phosphatidylinositol-mediated signaling	11/321	178/18903	0.000239744848136728	0.00995881295642466	0.00769954558721875	8678/56005/113791/54209/7430/10617/8473/3815/2322/1956/23236	11
GO:0009897	CC	GO:0009897	external side of plasma membrane	18/324	462/19869	0.000623898193340976	0.0100655575192344	0.00809973093109337	5034/8764/7048/958/972/10159/11120/945/9936/80381/4217/3575/9244/3815/84966/762/356/79679	18
GO:0010821	BP	GO:0010821	regulation of mitochondrion organization	10/321	150/18903	0.000249193488020241	0.0101891245835509	0.00787760846279279	400916/51024/9141/637/11315/5329/581/54209/93974/4137	10
GO:0030100	BP	GO:0030100	regulation of endocytosis	12/321	209/18903	0.000250098880502547	0.0101891245835509	0.00787760846279279	5534/4043/5770/967/54209/3190/9779/51160/8650/3565/4908/57126	12
GO:0098791	CC	GO:0098791	Golgi apparatus subcompartment	16/324	387/19869	0.00066189001951841	0.0102090295358212	0.00821518253208751	1211/8678/10067/6810/6480/84661/972/6272/2650/10890/9482/163882/2802/143187/27236/762	16
GO:0045334	CC	GO:0045334	clathrin-coated endocytic vesicle	7/324	90/19869	0.000674977159393136	0.0102090295358212	0.00821518253208751	1211/950/972/8673/3575/1956/338	7
GO:0090322	BP	GO:0090322	regulation of superoxide metabolic process	5/321	34/18903	0.000254180222832221	0.010239255764357	0.0079163668282372	7040/683/5446/57126/4137	5
GO:0002703	BP	GO:0002703	regulation of leukocyte mediated immunity	13/321	241/18903	0.000257179425449383	0.010239255764357	0.0079163668282372	6810/3965/4179/958/7040/54209/84868/8673/3575/3815/3565/4049/57126	13
GO:1902170	BP	GO:1902170	cellular response to reactive nitrogen species	4/321	19/18903	0.0002585792699519	0.010239255764357	0.0079163668282372	2308/4217/4314/1800	4
GO:0046718	BP	GO:0046718	viral entry into host cell	10/321	151/18903	0.000262929979764674	0.0103151326320641	0.00797503018545483	5034/8764/3965/4179/950/972/26762/682/8673/1956	10
GO:0042098	BP	GO:0042098	T cell proliferation	12/321	212/18903	0.00028499336033753	0.0108642079686465	0.00839954168128587	8764/8379/3965/637/4179/7048/581/80381/84868/3565/4254/79679	12
GO:0043280	BP	GO:0043280	positive regulation of cysteine-type endopeptidase activity involved in apoptotic process	9/321	125/18903	0.000286268373160061	0.0108642079686465	0.00839954168128587	51024/9141/3965/637/1509/581/4217/356/4137	9
GO:0061564	BP	GO:0061564	axon development	20/321	490/18903	0.000289787697556284	0.0108642079686465	0.00839954168128587	8636/28988/8428/5604/4747/682/23654/11344/10890/23077/7408/8650/1630/4685/91653/56963/10381/2043/4137/347	20
GO:0042129	BP	GO:0042129	regulation of T cell proliferation	11/321	182/18903	0.000290413954299631	0.0108642079686465	0.00839954168128587	8764/8379/3965/637/4179/7048/80381/84868/3565/4254/79679	11
GO:0048017	BP	GO:0048017	inositol lipid-mediated signaling	11/321	182/18903	0.000290413954299631	0.0108642079686465	0.00839954168128587	8678/56005/113791/54209/7430/10617/8473/3815/2322/1956/23236	11
GO:0048284	BP	GO:0048284	organelle fusion	10/321	153/18903	0.000292310528304389	0.0108642079686465	0.00839954168128587	51024/6810/23557/581/8773/8673/9482/208/9342/143187	10
GO:0044000	BP	GO:0044000	movement in host	11/321	183/18903	0.000304403994425039	0.0110244173484204	0.00852340578320912	5034/8764/3965/4179/950/972/9525/26762/682/8673/1956	11
GO:0097696	BP	GO:0097696	receptor signaling pathway via STAT	11/321	183/18903	0.000304403994425039	0.0110244173484204	0.00852340578320912	7132/958/7040/10464/10617/3575/9244/3815/11009/2322/3565	11
GO:0036473	BP	GO:0036473	cell death in response to oxidative stress	8/321	100/18903	0.000304426912854657	0.0110244173484204	0.00852340578320912	5034/142/11315/8428/54209/2309/4217/4314	8
GO:0031629	BP	GO:0031629	synaptic vesicle fusion to presynaptic active zone membrane	4/321	20/18903	0.000318921663656217	0.0112618627864874	0.00870698408544991	6810/23557/8773/9342	4
GO:1902107	BP	GO:1902107	positive regulation of leukocyte differentiation	11/321	184/18903	0.000318957643233062	0.0112618627864874	0.00870698408544991	3965/4179/7048/972/7040/54209/8546/2309/3575/3565/4254	11
GO:1903708	BP	GO:1903708	positive regulation of hemopoiesis	11/321	184/18903	0.000318957643233062	0.0112618627864874	0.00870698408544991	3965/4179/7048/972/7040/54209/8546/2309/3575/3565/4254	11
GO:0031103	BP	GO:0031103	axon regeneration	6/321	55/18903	0.000329438256336166	0.0115357842322011	0.0089187634077264	8428/5604/4747/56963/2043/347	6
GO:0043434	BP	GO:0043434	response to peptide hormone	18/321	421/18903	0.000334388766691361	0.0116131574136992	0.00897858362332628	142/5770/4747/682/9518/4048/6272/2650/4149/10890/208/2308/4790/8473/8614/51083/9734/23236	18
GO:0070372	BP	GO:0070372	regulation of ERK1 and ERK2 cascade	15/321	315/18903	0.000340410674936972	0.0117261791033167	0.00906596508689652	3965/59/5770/5604/972/7040/284340/54209/7430/84868/9693/5801/1956/8000/2043	15
GO:0043405	BP	GO:0043405	regulation of MAP kinase activity	11/321	186/18903	0.000349827914770789	0.011953394152289	0.0092416338774762	958/5770/7040/4217/3815/2322/1956/7148/4254/4908/2043	11
GO:0072665	BP	GO:0072665	protein localization to vacuole	7/321	78/18903	0.000359095107694088	0.0121718877703988	0.00941055979068632	8678/950/137492/6272/51160/8546/7369	7
GO:0002573	BP	GO:0002573	myeloid leukocyte differentiation	12/321	218/18903	0.000367304041006934	0.0122540726121762	0.00947410008796999	2488/142/7048/4627/972/7040/4055/54209/8546/3815/3565/4254	12
GO:0043523	BP	GO:0043523	regulation of neuron apoptotic process	12/321	218/18903	0.000367304041006934	0.0122540726121762	0.00947410008796999	142/11315/581/4747/54209/6733/2309/10617/9244/4908/356/7020	12
GO:0044409	BP	GO:0044409	entry into host	10/321	158/18903	0.000377976737350323	0.0124906778248924	0.00965702877931635	5034/8764/3965/4179/950/972/26762/682/8673/1956	10
GO:0050870	BP	GO:0050870	positive regulation of T cell activation	13/321	251/18903	0.000380292055560803	0.0124906778248924	0.00965702877931635	8764/3965/4179/7048/972/80381/84868/8546/2309/3575/3565/4254/79679	13
GO:0043299	BP	GO:0043299	leukocyte degranulation	7/321	79/18903	0.000388364222032947	0.0125726003886923	0.00972036629929579	6810/3965/8773/8673/3815/3565/57126	7
GO:0099500	BP	GO:0099500	vesicle fusion to plasma membrane	4/321	21/18903	0.000388720946641183	0.0125726003886923	0.00972036629929579	6810/23557/8773/9342	4
GO:0043123	BP	GO:0043123	positive regulation of I-kappaB kinase/NF-kappaB signaling	11/321	189/18903	0.000400821838794525	0.0128657737194879	0.00994703000262012	60401/7132/3965/51246/958/972/8795/4055/92140/23118/356	11
GO:0045121	CC	GO:0045121	membrane raft	14/324	326/19869	0.000987686927210331	0.0137485285871827	0.0110634092589335	7132/11315/79026/7048/1509/9289/682/54209/7430/481/1956/356/57126/4137	14
GO:0098857	CC	GO:0098857	membrane microdomain	14/324	327/19869	0.00101702961646703	0.0137485285871827	0.0110634092589335	7132/11315/79026/7048/1509/9289/682/54209/7430/481/1956/356/57126/4137	14
GO:0005766	CC	GO:0005766	primary lysosome	9/324	155/19869	0.00102363824908623	0.0137485285871827	0.0110634092589335	10577/2720/967/10970/1075/311/8773/8673/9342	9
GO:0042582	CC	GO:0042582	azurophil granule	9/324	155/19869	0.00102363824908623	0.0137485285871827	0.0110634092589335	10577/2720/967/10970/1075/311/8773/8673/9342	9
GO:0001931	CC	GO:0001931	uropod	3/324	13/19869	0.00108828493745822	0.0137485285871827	0.0110634092589335	4627/7430/683	3
GO:0031254	CC	GO:0031254	cell trailing edge	3/324	13/19869	0.00108828493745822	0.0137485285871827	0.0110634092589335	4627/7430/683	3
GO:0098858	CC	GO:0098858	actin-based cell projection	11/324	223/19869	0.00113394794375483	0.0137485285871827	0.0110634092589335	59/7040/5064/9936/7430/11344/7408/4254/1800/10381/2043	11
GO:0030669	CC	GO:0030669	clathrin-coated endocytic vesicle membrane	6/324	72/19869	0.00113624203199857	0.0137485285871827	0.0110634092589335	950/972/8673/3575/1956/338	6
GO:0006754	BP	GO:0006754	ATP biosynthetic process	8/321	106/18903	0.000451977427305705	0.0142912564141363	0.0110491261097828	6390/142/4726/4698/7040/54209/4713/3565	8
GO:0042102	BP	GO:0042102	positive regulation of T cell proliferation	8/321	106/18903	0.000451977427305705	0.0142912564141363	0.0110491261097828	3965/4179/7048/80381/84868/3565/4254/79679	8
GO:0007034	BP	GO:0007034	vacuolar transport	10/321	162/18903	0.000460723119213039	0.0144598804155974	0.0111794958829706	8678/950/137492/23557/9525/6272/51160/8546/9482/143187	10
GO:0032928	BP	GO:0032928	regulation of superoxide anion generation	4/321	22/18903	0.000468786315955092	0.0145375513282747	0.0112395462861237	7040/5446/57126/4137	4
GO:0006898	BP	GO:0006898	receptor-mediated endocytosis	13/321	257/18903	0.000475884319555316	0.0145375513282747	0.0112395462861237	1211/28988/5534/7048/950/4043/967/7430/3190/9779/8650/3565/4908	13
GO:0009142	BP	GO:0009142	nucleoside triphosphate biosynthetic process	9/321	134/18903	0.00047830395133183	0.0145375513282747	0.0112395462861237	6390/142/4726/4698/7040/1841/54209/4713/3565	9
GO:0002090	BP	GO:0002090	regulation of receptor internalization	6/321	59/18903	0.000483784455342632	0.0145375513282747	0.0112395462861237	5534/4043/967/9779/8650/4908	6
GO:0072666	BP	GO:0072666	establishment of protein localization to vacuole	6/321	59/18903	0.000483784455342632	0.0145375513282747	0.0112395462861237	8678/950/137492/6272/51160/8546	6
GO:0097352	BP	GO:0097352	autophagosome maturation	6/321	59/18903	0.000483784455342632	0.0145375513282747	0.0112395462861237	8678/23557/9525/8673/9342/10241	6
GO:1905897	BP	GO:1905897	regulation of response to endoplasmic reticulum stress	7/321	82/18903	0.000487783143509458	0.0145544871764054	0.0112526400489358	11315/4102/5770/581/51035/7917/29761	7
GO:2001235	BP	GO:2001235	positive regulation of apoptotic signaling pathway	9/321	135/18903	0.000504976585175823	0.0149621384013284	0.0115678110641676	51024/8678/637/11315/581/2923/4055/1075/6789	9
GO:1903050	BP	GO:1903050	regulation of proteolysis involved in protein catabolic process	12/321	227/18903	0.000527990518671644	0.0155353876917483	0.0120110123838169	11315/51035/7917/54209/1075/27074/29761/150684/93974/5887/8473/2043	12
GO:0030666	CC	GO:0030666	endocytic vesicle membrane	10/324	194/19869	0.00135722165402356	0.0160218361109123	0.0128927345825088	6810/950/972/81035/10890/8773/8673/3575/1956/338	10
GO:0032418	BP	GO:0032418	lysosome localization	7/321	84/18903	0.000564629951659487	0.0163858705834332	0.0126685537820067	3965/4627/23557/8773/8673/3815/3565	7
GO:1990849	BP	GO:1990849	vacuolar localization	7/321	84/18903	0.000564629951659487	0.0163858705834332	0.0126685537820067	3965/4627/23557/8773/8673/3815/3565	7
GO:0048872	BP	GO:0048872	homeostasis of number of cells	14/321	296/18903	0.000569944682477389	0.0164275892493653	0.0127008081050457	3965/581/972/9289/2271/8546/93974/2309/10000/26058/3575/3815/2322/4254	14
GO:0060135	BP	GO:0060135	maternal process involved in female pregnancy	6/321	61/18903	0.000579515723863904	0.0165905954189957	0.012826834513972	142/3965/10935/682/84868/8614	6
GO:0030336	BP	GO:0030336	negative regulation of cell migration	16/321	368/18903	0.000592010039553142	0.0167665011451965	0.0129628340717368	8428/972/7040/25817/9289/2309/23332/8473/3486/11009/3565/5801/1800/2043/347/23236	16
GO:0042060	BP	GO:0042060	wound healing	18/321	442/18903	0.000593574503606201	0.0167665011451965	0.0129628340717368	79026/10413/7048/59/958/5329/4627/9525/7040/25817/8546/4087/4217/23332/11009/2778/11093/221037	18
GO:0014066	BP	GO:0014066	regulation of phosphatidylinositol 3-kinase signaling	8/321	111/18903	0.000615174807794297	0.0171828451877014	0.0132847258422983	8678/56005/113791/54209/10617/3815/2322/1956	8
GO:0050769	BP	GO:0050769	positive regulation of neurogenesis	12/321	231/18903	0.000616424939469109	0.0171828451877014	0.0132847258422983	28988/5604/5501/7040/4747/23654/11344/8650/3815/4049/2043/4137	12
GO:0032733	BP	GO:0032733	positive regulation of interleukin-10 production	5/321	41/18903	0.000621255212427905	0.01720430284351	0.0133013155904757	3965/4179/54209/10464/3565	5
GO:0022617	BP	GO:0022617	extracellular matrix disassembly	6/321	62/18903	0.000632580964861841	0.0172339446730789	0.0133242328416634	1471/7040/1515/23332/4314/5650	6
GO:0031102	BP	GO:0031102	neuron projection regeneration	6/321	62/18903	0.000632580964861841	0.0172339446730789	0.0133242328416634	8428/5604/4747/56963/2043/347	6
GO:0071214	BP	GO:0071214	cellular response to abiotic stimulus	15/321	335/18903	0.000646157805046538	0.0172339446730789	0.0133242328416634	142/7132/10413/5269/958/581/8795/4055/5064/10725/208/4255/4790/7528/4314	15
GO:0104004	BP	GO:0104004	cellular response to environmental stimulus	15/321	335/18903	0.000646157805046538	0.0172339446730789	0.0133242328416634	142/7132/10413/5269/958/581/8795/4055/5064/10725/208/4255/4790/7528/4314	15
GO:0043473	BP	GO:0043473	pigmentation	8/321	112/18903	0.000652908394333176	0.0172339446730789	0.0133242328416634	23557/10540/581/967/10159/8546/3815/4254	8
GO:0048259	BP	GO:0048259	regulation of receptor-mediated endocytosis	8/321	112/18903	0.000652908394333176	0.0172339446730789	0.0133242328416634	5534/4043/967/3190/9779/8650/3565/4908	8
GO:0034341	BP	GO:0034341	response to interferon-gamma	9/321	140/18903	0.000657310648672535	0.0172339446730789	0.0133242328416634	6810/3965/958/972/11140/9482/10241/356/11093	9
GO:0010623	BP	GO:0010623	programmed cell death involved in cell development	4/321	24/18903	0.000663000467715804	0.0172339446730789	0.0133242328416634	581/3815/4254/356	4
GO:0032528	BP	GO:0032528	microvillus organization	4/321	24/18903	0.000663000467715804	0.0172339446730789	0.0133242328416634	7430/11344/9693/53827	4
GO:0035162	BP	GO:0035162	embryonic hemopoiesis	4/321	24/18903	0.000663000467715804	0.0172339446730789	0.0133242328416634	7048/6789/3815/4254	4
GO:0001819	BP	GO:0001819	positive regulation of cytokine production	19/321	486/18903	0.000689813974528928	0.0176461303774179	0.0136429096392742	8764/3965/11315/4179/958/972/7040/284340/10159/54209/80381/84868/10464/3815/3565/4049/79679/23236/5047	19
GO:0002714	BP	GO:0002714	positive regulation of B cell mediated immunity	5/321	42/18903	0.000695516585562614	0.0176461303774179	0.0136429096392742	958/7040/54209/3565/4049	5
GO:0002891	BP	GO:0002891	positive regulation of immunoglobulin mediated immune response	5/321	42/18903	0.000695516585562614	0.0176461303774179	0.0136429096392742	958/7040/54209/3565/4049	5
GO:0006623	BP	GO:0006623	protein targeting to vacuole	5/321	42/18903	0.000695516585562614	0.0176461303774179	0.0136429096392742	8678/950/137492/6272/8546	5
GO:0002683	BP	GO:0002683	negative regulation of immune system process	18/321	449/18903	0.00071187734734432	0.0179537161946303	0.0138807161963379	8764/142/8379/3965/4179/972/7040/54209/7430/84868/10464/3575/3565/51083/4254/79679/347/23236	18
GO:0075522	BP	GO:0075522	IRES-dependent viral translational initiation	3/321	11/18903	0.000723454104497131	0.0181308542778291	0.0140176685372233	6741/5094/7812	3
GO:0051701	BP	GO:0051701	biological process involved in interaction with host	11/321	203/18903	0.000728872700453848	0.0181308542778291	0.0140176685372233	5034/8764/3965/4179/950/972/9525/26762/682/8673/1956	11
GO:0007259	BP	GO:0007259	receptor signaling pathway via JAK-STAT	10/321	172/18903	0.000735301871756296	0.0181308542778291	0.0140176685372233	7132/958/10464/10617/3575/9244/3815/11009/2322/3565	10
GO:0002712	BP	GO:0002712	regulation of B cell mediated immunity	6/321	64/18903	0.000749953054405859	0.0181308542778291	0.0140176685372233	4179/958/7040/54209/3565/4049	6
GO:0002889	BP	GO:0002889	regulation of immunoglobulin mediated immune response	6/321	64/18903	0.000749953054405859	0.0181308542778291	0.0140176685372233	4179/958/7040/54209/3565/4049	6
GO:0070371	BP	GO:0070371	ERK1 and ERK2 cascade	15/321	340/18903	0.000751692602048335	0.0181308542778291	0.0140176685372233	3965/59/5770/5604/972/7040/284340/54209/7430/84868/9693/5801/1956/8000/2043	15
GO:0022407	BP	GO:0022407	regulation of cell-cell adhesion	19/321	490/18903	0.000760589304652285	0.0181308542778291	0.0140176685372233	8764/8379/3965/4179/7048/5329/972/7040/2650/80381/84868/10725/53827/8546/2309/3575/3565/4254/79679	19
GO:2001056	BP	GO:2001056	positive regulation of cysteine-type endopeptidase activity	9/321	143/18903	0.000765452472474318	0.0181308542778291	0.0140176685372233	51024/9141/3965/637/1509/581/4217/356/4137	9
GO:0050767	BP	GO:0050767	regulation of neurogenesis	16/321	377/18903	0.000766282812659976	0.0181308542778291	0.0140176685372233	28988/10413/5604/5501/7040/4747/54209/23654/11344/9693/8650/1630/3815/4049/2043/4137	16
GO:1903037	BP	GO:1903037	regulation of leukocyte cell-cell adhesion	16/321	377/18903	0.000766282812659976	0.0181308542778291	0.0140176685372233	8764/8379/3965/4179/7048/972/2650/80381/84868/10725/8546/2309/3575/3565/4254/79679	16
GO:1904037	BP	GO:1904037	positive regulation of epithelial cell apoptotic process	5/321	43/18903	0.000776219792292309	0.0181308542778291	0.0140176685372233	958/581/6789/2309/356	5
GO:0009219	BP	GO:0009219	pyrimidine deoxyribonucleotide metabolic process	4/321	25/18903	0.000778809411981332	0.0181308542778291	0.0140176685372233	79077/1841/30833/1635	4
GO:0043302	BP	GO:0043302	positive regulation of leukocyte degranulation	4/321	25/18903	0.000778809411981332	0.0181308542778291	0.0140176685372233	6810/8673/3565/57126	4
GO:0048499	BP	GO:0048499	synaptic vesicle membrane organization	4/321	25/18903	0.000778809411981332	0.0181308542778291	0.0140176685372233	6810/23557/8773/9342	4
GO:0031252	CC	GO:0031252	cell leading edge	16/324	421/19869	0.00159263584521053	0.0183532321209975	0.0147688035771402	5034/55845/6810/28988/59/4627/10159/7430/11344/7408/208/1956/4254/57126/10381/4137	16
GO:0010950	BP	GO:0010950	positive regulation of endopeptidase activity	10/321	174/18903	0.000803822692748699	0.0186109111976844	0.0143888192110092	51024/9141/3965/637/1509/581/4217/356/2043/4137	10
GO:0002697	BP	GO:0002697	regulation of immune effector process	16/321	379/18903	0.000810453385943416	0.018662451066534	0.0144286666879629	8764/6810/3965/4179/958/972/7040/54209/84868/8673/3575/3815/3565/4049/57126/5650	16
GO:0051960	BP	GO:0051960	regulation of nervous system development	18/321	456/18903	0.000849910924216408	0.0193471124919948	0.0149580050619449	28988/10413/5604/5501/7040/4747/54209/23654/1075/11344/9693/8650/1630/3815/57633/4049/2043/4137	18
GO:0009394	BP	GO:0009394	2'-deoxyribonucleotide metabolic process	5/321	44/18903	0.000863709380106167	0.0193471124919948	0.0149580050619449	79077/1841/30833/84618/1635	5
GO:1903573	BP	GO:1903573	negative regulation of response to endoplasmic reticulum stress	5/321	44/18903	0.000863709380106167	0.0193471124919948	0.0149580050619449	11315/4102/5770/51035/29761	5
GO:0009206	BP	GO:0009206	purine ribonucleoside triphosphate biosynthetic process	8/321	117/18903	0.000870587593953633	0.0193471124919948	0.0149580050619449	6390/142/4726/4698/7040/54209/4713/3565	8
GO:0045582	BP	GO:0045582	positive regulation of T cell differentiation	8/321	117/18903	0.000870587593953633	0.0193471124919948	0.0149580050619449	3965/4179/7048/972/8546/2309/3575/3565	8
GO:0071887	BP	GO:0071887	leukocyte apoptotic process	8/321	117/18903	0.000870587593953633	0.0193471124919948	0.0149580050619449	3965/6480/581/972/9693/3575/4254/356	8
GO:0040013	BP	GO:0040013	negative regulation of locomotion	17/321	419/18903	0.000872149748872079	0.0193471124919948	0.0149580050619449	6480/8428/972/7040/25817/9289/2309/23332/8473/3486/11009/3565/5801/1800/2043/347/23236	17
GO:1901136	BP	GO:1901136	carbohydrate derivative catabolic process	10/321	176/18903	0.000877512470261748	0.0193646892525991	0.0149715943391149	79077/1471/191/2720/7040/30833/84618/10724/3704/3423	10
GO:0030426	CC	GO:0030426	growth cone	9/324	167/19869	0.00172061960836971	0.0193669741965335	0.0155845594882936	10540/4747/11344/1630/91653/5923/10381/2043/4137	9
GO:2000146	BP	GO:2000146	negative regulation of cell motility	16/321	383/18903	0.000905332574895002	0.0198750990664773	0.0153662120156708	8428/972/7040/25817/9289/2309/23332/8473/3486/11009/3565/5801/1800/2043/347/23236	16
GO:0009145	BP	GO:0009145	purine nucleoside triphosphate biosynthetic process	8/321	118/18903	0.000920404157126687	0.020016685164331	0.0154756777340964	6390/142/4726/4698/7040/54209/4713/3565	8
GO:0045055	BP	GO:0045055	regulated exocytosis	12/321	242/18903	0.000925954753884559	0.020016685164331	0.0154756777340964	6810/3965/4627/23557/10890/8773/8673/9342/3815/3565/22930/57126	12
GO:0097529	BP	GO:0097529	myeloid leukocyte migration	12/321	242/18903	0.000925954753884559	0.020016685164331	0.0154756777340964	972/682/284340/54209/5479/683/3815/3565/7369/4254/57126/23236	12
GO:0038180	BP	GO:0038180	nerve growth factor signaling pathway	3/321	12/18903	0.000952512814838364	0.0202013279782195	0.0156184322741312	6272/9693/4908	3
GO:1903800	BP	GO:1903800	positive regulation of miRNA maturation	3/321	12/18903	0.000952512814838364	0.0202013279782195	0.0156184322741312	5604/7040/1956	3
GO:0045576	BP	GO:0045576	mast cell activation	6/321	67/18903	0.000956749287448618	0.0202013279782195	0.0156184322741312	3965/26762/8773/8673/3815/3565	6
GO:0009262	BP	GO:0009262	deoxyribonucleotide metabolic process	5/321	45/18903	0.000958335360779354	0.0202013279782195	0.0156184322741312	79077/1841/30833/84618/1635	5
GO:0019692	BP	GO:0019692	deoxyribose phosphate metabolic process	5/321	45/18903	0.000958335360779354	0.0202013279782195	0.0156184322741312	79077/1841/30833/84618/1635	5
GO:0006906	BP	GO:0006906	vesicle fusion	8/321	119/18903	0.000972479904491749	0.0203980067095621	0.0157704922500173	6810/23557/8773/8673/9482/208/9342/143187	8
GO:0030027	CC	GO:0030027	lamellipodium	10/324	203/19869	0.00189997591485721	0.0208997350634293	0.0168179686243342	5034/55845/6810/28988/59/11344/7408/4254/57126/10381	10
GO:0051962	BP	GO:0051962	positive regulation of nervous system development	13/321	279/18903	0.00101911551801139	0.021270898767558	0.0164453590461574	28988/5604/5501/7040/4747/23654/11344/8650/3815/57633/4049/2043/4137	13
GO:0007006	BP	GO:0007006	mitochondrial membrane organization	8/321	120/18903	0.00102688840774872	0.0213280695276045	0.0164895599840764	400916/9141/9804/637/581/10989/8546/93974	8
GO:0022406	BP	GO:0022406	membrane docking	7/321	93/18903	0.00103752408096441	0.0213397550050786	0.0164985944811509	6810/7430/10890/8673/9482/9342/57488	7
GO:2000106	BP	GO:2000106	regulation of leukocyte apoptotic process	7/321	93/18903	0.00103752408096441	0.0213397550050786	0.0164985944811509	3965/6480/581/972/9693/3575/4254	7
GO:0044342	BP	GO:0044342	type B pancreatic cell proliferation	4/321	27/18903	0.00105201270210059	0.0214297010519241	0.0165681352679	3487/1992/3486/5923	4
GO:0090200	BP	GO:0090200	positive regulation of release of cytochrome c from mitochondria	4/321	27/18903	0.00105201270210059	0.0214297010519241	0.0165681352679	9141/637/5329/581	4
GO:1904724	CC	GO:1904724	tertiary granule lumen	5/324	55/19869	0.00199562504853227	0.0214385407657067	0.0172515443308209	1471/28988/1509/1476/4048	5
GO:0045335	CC	GO:0045335	phagocytic vesicle	8/324	139/19869	0.00203754726285642	0.0214385407657067	0.0172515443308209	8678/6810/2923/10890/311/8773/8673/9482	8
GO:0090174	BP	GO:0090174	organelle membrane fusion	8/321	121/18903	0.00108370452070848	0.0219696461925446	0.0169855878541667	6810/23557/8773/8673/9482/208/9342/143187	8
GO:1900542	BP	GO:1900542	regulation of purine nucleotide metabolic process	7/321	94/18903	0.00110500774072727	0.0222948466545783	0.0172370129781617	51024/142/23413/54209/93974/8473/3565	7
GO:0034394	BP	GO:0034394	protein localization to cell surface	6/321	69/18903	0.00111723310919994	0.0224346762259722	0.0173451206576713	6810/23184/8546/150684/57120/57126	6
GO:0009201	BP	GO:0009201	ribonucleoside triphosphate biosynthetic process	8/321	123/18903	0.00120486533907912	0.0238747385778293	0.0184584888648137	6390/142/4726/4698/7040/54209/4713/3565	8
GO:0072655	BP	GO:0072655	establishment of protein localization to mitochondrion	8/321	123/18903	0.00120486533907912	0.0238747385778293	0.0184584888648137	51024/9141/9804/637/581/8546/93974/4137	8
GO:0031342	BP	GO:0031342	negative regulation of cell killing	4/321	28/18903	0.00121108423013912	0.0238747385778293	0.0184584888648137	3965/84868/3575/3565	4
GO:0007183	BP	GO:0007183	SMAD protein complex assembly	3/321	13/18903	0.00122275625947344	0.0238747385778293	0.0184584888648137	142/7040/4087	3
GO:0032536	BP	GO:0032536	regulation of cell projection size	3/321	13/18903	0.00122275625947344	0.0238747385778293	0.0184584888648137	4747/7430/11344	3
GO:1903054	BP	GO:1903054	negative regulation of extracellular matrix organization	3/321	13/18903	0.00122275625947344	0.0238747385778293	0.0184584888648137	1471/7132/7040	3
GO:0007032	BP	GO:0007032	endosome organization	7/321	96/18903	0.00125028596841425	0.024189322594389	0.0187017060019474	950/137492/9525/10159/9101/51160/356	7
GO:0045807	BP	GO:0045807	positive regulation of endocytosis	7/321	96/18903	0.00125028596841425	0.024189322594389	0.0187017060019474	967/54209/3190/9779/51160/3565/4908	7
GO:0061077	BP	GO:0061077	chaperone-mediated protein folding	6/321	71/18903	0.00129758158099401	0.0248771636138988	0.0192335026437407	9141/972/10049/79982/5479/7369	6
GO:2000379	BP	GO:2000379	positive regulation of reactive oxygen species metabolic process	6/321	71/18903	0.00129758158099401	0.0248771636138988	0.0192335026437407	11315/7048/7040/2309/57126/4137	6
GO:0031667	BP	GO:0031667	response to nutrient levels	18/321	474/18903	0.00131434186381729	0.025084984130603	0.0193941767671855	8678/191/7048/8428/581/9518/4149/9779/2029/663/1312/2309/2308/4255/4217/8473/8614/4049	18
GO:0042599	CC	GO:0042599	lamellar body	3/324	17/19869	0.00246546159968746	0.0253365928162908	0.0203882978295511	10970/27074/5650	3
GO:0005758	CC	GO:0005758	mitochondrial intermembrane space	6/324	84/19869	0.00251271994872305	0.0253365928162908	0.0203882978295511	400916/11315/57019/10989/4713/204	6
GO:0006109	BP	GO:0006109	regulation of carbohydrate metabolic process	10/321	186/18903	0.00133404695199202	0.0253468920878484	0.0195966679943317	950/10447/7040/3487/208/2308/4790/8473/3486/5903	10
GO:0001773	BP	GO:0001773	myeloid dendritic cell activation	4/321	29/18903	0.00138625219556533	0.0255128795321935	0.0197249993426795	7048/4055/84868/3565	4
GO:0006622	BP	GO:0006622	protein targeting to lysosome	4/321	29/18903	0.00138625219556533	0.0255128795321935	0.0197249993426795	8678/950/6272/8546	4
GO:0048873	BP	GO:0048873	homeostasis of number of cells within a tissue	4/321	29/18903	0.00138625219556533	0.0255128795321935	0.0197249993426795	581/2271/10000/26058	4
GO:0060074	BP	GO:0060074	synapse maturation	4/321	29/18903	0.00138625219556533	0.0255128795321935	0.0197249993426795	4747/5064/63827/84966	4
GO:1901018	BP	GO:1901018	positive regulation of potassium ion transmembrane transporter activity	4/321	29/18903	0.00138625219556533	0.0255128795321935	0.0197249993426795	54209/481/51083/483	4
GO:1902175	BP	GO:1902175	regulation of oxidative stress-induced intrinsic apoptotic signaling pathway	4/321	29/18903	0.00138625219556533	0.0255128795321935	0.0197249993426795	5034/142/11315/54209	4
GO:0030324	BP	GO:0030324	lung development	10/321	187/18903	0.00138872860971064	0.0255128795321935	0.0197249993426795	5534/10413/7048/5604/7917/4048/10905/8546/1977/4087	10
GO:0006605	BP	GO:0006605	protein targeting	14/321	325/18903	0.00140087355558424	0.0255128795321935	0.0197249993426795	51024/8678/9141/9804/637/950/137492/7917/10971/6272/11140/8546/208/93974	14
GO:0043300	BP	GO:0043300	regulation of leukocyte degranulation	5/321	49/18903	0.00141537273413933	0.0255128795321935	0.0197249993426795	6810/3965/8673/3565/57126	5
GO:0048066	BP	GO:0048066	developmental pigmentation	5/321	49/18903	0.00141537273413933	0.0255128795321935	0.0197249993426795	581/967/10159/3815/4254	5
GO:1904894	BP	GO:1904894	positive regulation of receptor signaling pathway via STAT	5/321	49/18903	0.00141537273413933	0.0255128795321935	0.0197249993426795	7040/10464/3575/3815/3565	5
GO:2000378	BP	GO:2000378	negative regulation of reactive oxygen species metabolic process	5/321	49/18903	0.00141537273413933	0.0255128795321935	0.0197249993426795	8678/11315/5446/7020/4314	5
GO:0051251	BP	GO:0051251	positive regulation of lymphocyte activation	16/321	400/18903	0.00142106197063905	0.0255128795321935	0.0197249993426795	8764/3965/4179/7048/958/972/7040/80381/84868/8546/2309/683/3575/3565/4254/79679	16
GO:0043122	BP	GO:0043122	regulation of I-kappaB kinase/NF-kappaB signaling	12/321	255/18903	0.00144894778947099	0.0259037628016396	0.0200272063994391	60401/7132/3965/51246/958/972/8795/4055/54209/92140/23118/356	12
GO:0006140	BP	GO:0006140	regulation of nucleotide metabolic process	7/321	99/18903	0.0014957725251889	0.0265807758465119	0.0205506315129486	51024/142/23413/54209/93974/8473/3565	7
GO:1903578	BP	GO:1903578	regulation of ATP metabolic process	6/321	73/18903	0.00149936403760121	0.0265807758465119	0.0205506315129486	51024/142/54209/93974/8473/3565	6
GO:0046598	BP	GO:0046598	positive regulation of viral entry into host cell	3/321	14/18903	0.00153675835918427	0.0270176148044139	0.020888368699635	5034/3965/972	3
GO:0075294	BP	GO:0075294	positive regulation by symbiont of entry into host	3/321	14/18903	0.00153675835918427	0.0270176148044139	0.020888368699635	5034/3965/972	3
GO:0070585	BP	GO:0070585	protein localization to mitochondrion	8/321	128/18903	0.00155538221616948	0.0272320431814467	0.0210541516168744	51024/9141/9804/637/581/8546/93974/4137	8
GO:0060205	CC	GO:0060205	cytoplasmic vesicle lumen	13/324	325/19869	0.00275803024022213	0.0272425844136227	0.021922044873946	23071/28988/10577/2720/1509/10447/7040/1476/1075/1992/9535/4790/356	13
GO:0002366	BP	GO:0002366	leukocyte activation involved in immune response	13/321	293/18903	0.0015823645728747	0.0275904473056382	0.0213312477833487	6810/3965/4179/958/972/7040/54209/84868/8773/8673/3815/3565/57126	13
GO:0030323	BP	GO:0030323	respiratory tube development	10/321	191/18903	0.00162600237535985	0.0282351314114741	0.0218296781368414	5534/10413/7048/5604/7917/4048/10905/8546/1977/4087	10
GO:0006887	BP	GO:0006887	exocytosis	15/321	369/18903	0.00169689684232996	0.0293459262079675	0.0226884767919692	6810/3965/4627/23557/9525/51019/10890/8773/8673/9342/23332/3815/3565/22930/57126	15
GO:0048638	BP	GO:0048638	regulation of developmental growth	14/321	332/18903	0.00170925773810349	0.029439532668067	0.0227608475865556	28988/10413/7048/9518/7430/11344/6789/23077/5479/1630/8614/7528/4137/23236	14
GO:0045621	BP	GO:0045621	positive regulation of lymphocyte differentiation	8/321	130/18903	0.00171636285169374	0.0294422243021311	0.0227629285935262	3965/4179/7048/972/8546/2309/3575/3565	8
GO:0008630	BP	GO:0008630	intrinsic apoptotic signaling pathway in response to DNA damage	7/321	102/18903	0.00177730621255675	0.0303065428405135	0.0234311668682355	7132/51246/637/581/972/7917/3190	7
GO:0002263	BP	GO:0002263	cell activation involved in immune response	13/321	297/18903	0.00178400137809458	0.0303065428405135	0.0234311668682355	6810/3965/4179/958/972/7040/54209/84868/8773/8673/3815/3565/57126	13
GO:0048679	BP	GO:0048679	regulation of axon regeneration	4/321	31/18903	0.00178820762570885	0.0303065428405135	0.0234311668682355	8428/5604/56963/2043	4
GO:0010952	BP	GO:0010952	positive regulation of peptidase activity	10/321	194/18903	0.00182470325615255	0.0308018633319457	0.0238141184027962	51024/9141/3965/637/1509/581/4217/356/2043/4137	10
GO:0043303	BP	GO:0043303	mast cell degranulation	5/321	52/18903	0.00185090334835227	0.0311201487578117	0.0240601972434096	3965/8773/8673/3815/3565	5
GO:0043255	BP	GO:0043255	regulation of carbohydrate biosynthetic process	7/321	103/18903	0.00187975560024368	0.0314803339060572	0.0243386703888427	10447/7040/208/2308/4790/8473/5903	7
GO:2000671	BP	GO:2000671	regulation of motor neuron apoptotic process	3/321	15/18903	0.00189692680780613	0.0316428302546242	0.0244643026352783	581/4747/9244	3
GO:0032386	BP	GO:0032386	regulation of intracellular transport	14/321	336/18903	0.00190952254555332	0.0317280275510173	0.0245301719783774	51024/9141/11315/5770/5604/23557/5501/7040/7430/208/93974/27236/4659/347	14
GO:0070482	BP	GO:0070482	response to oxygen levels	14/321	337/18903	0.00196252207608618	0.0324812735795982	0.0251125357762343	5034/8678/191/23576/7048/54209/9550/663/2309/2308/481/8614/4049/2043	14
GO:0009123	BP	GO:0009123	nucleoside monophosphate metabolic process	6/321	77/18903	0.00197372097561791	0.032539516629156	0.0251575657428751	1841/30833/84618/1635/51292/204	6
GO:0002702	BP	GO:0002702	positive regulation of production of molecular mediator of immune response	8/321	133/18903	0.00198223680484041	0.0325532455120496	0.0251681800761458	8764/6810/958/972/7040/3815/3565/5650	8
GO:0050920	BP	GO:0050920	regulation of chemotaxis	11/321	230/18903	0.0019904895096971	0.0325625639096008	0.025175384491678	6810/3965/6480/972/7040/284340/54209/23077/683/3565/4908	11
GO:0048260	BP	GO:0048260	positive regulation of receptor-mediated endocytosis	5/321	53/18903	0.00201574702356839	0.0326127209539401	0.0252141628532258	967/3190/9779/3565/4908	5
GO:0097300	BP	GO:0097300	programmed necrotic cell death	5/321	53/18903	0.00201574702356839	0.0326127209539401	0.0252141628532258	142/581/4217/8473/356	5
GO:0034315	BP	GO:0034315	regulation of Arp2/3 complex-mediated actin nucleation	4/321	32/18903	0.00201664689401282	0.0326127209539401	0.0252141628532258	55845/51019/9535/27236	4
GO:0050863	BP	GO:0050863	regulation of T cell activation	15/321	376/18903	0.00203484524453905	0.0327818984833154	0.0253449605803703	8764/8379/3965/637/4179/7048/972/80381/84868/8546/2309/3575/3565/4254/79679	15
GO:0002685	BP	GO:0002685	regulation of leukocyte migration	11/321	231/18903	0.00205919273820849	0.0330484834537476	0.0255510677882967	8764/3965/972/284340/54209/2650/683/3565/4254/347/23236	11
GO:0032496	BP	GO:0032496	response to lipopolysaccharide	14/321	339/18903	0.00207218730266355	0.0331315381184358	0.0256152805794994	3965/10935/7040/54209/84868/92140/23118/4790/11009/7369/338/356/4049/11093	14
GO:0101002	CC	GO:0101002	ficolin-1-rich granule	9/324	185/19869	0.00343024508510348	0.0332047724238017	0.0267198038208061	1471/28988/5269/2720/1509/1476/4048/10159/9535	9
GO:0050772	BP	GO:0050772	positive regulation of axonogenesis	6/321	78/18903	0.00210827313127823	0.0335817791625033	0.0259633794401973	28988/5604/4747/23654/11344/4137	6
GO:0051250	BP	GO:0051250	negative regulation of lymphocyte activation	9/321	166/18903	0.00216766363340397	0.0343833854417956	0.0265831324285723	8764/8379/3965/972/84868/10464/3565/51083/79679	9
GO:0009165	BP	GO:0009165	nucleotide biosynthetic process	13/321	304/18903	0.00218788025587639	0.0343833854417956	0.0265831324285723	6390/142/4726/4698/7040/1841/23413/54209/1635/4713/204/3565/4881	13
GO:0051047	BP	GO:0051047	positive regulation of secretion	13/321	304/18903	0.00218788025587639	0.0343833854417956	0.0265831324285723	6810/9525/7040/54209/945/7430/8673/23332/3565/51083/22930/4881/57126	13
GO:0002279	BP	GO:0002279	mast cell activation involved in immune response	5/321	54/18903	0.00219105831231645	0.0343833854417956	0.0265831324285723	3965/8773/8673/3815/3565	5
GO:0010715	BP	GO:0010715	regulation of extracellular matrix disassembly	3/321	16/18903	0.00230550906338402	0.0359133893439635	0.027766037946018	1471/7040/23332	3
GO:0030033	BP	GO:0030033	microvillus assembly	3/321	16/18903	0.00230550906338402	0.0359133893439635	0.027766037946018	7430/9693/53827	3
GO:1901293	BP	GO:1901293	nucleoside phosphate biosynthetic process	13/321	306/18903	0.00231618213194185	0.0359257669951088	0.0277756075894758	6390/142/4726/4698/7040/1841/23413/54209/1635/4713/204/3565/4881	13
GO:0002444	BP	GO:0002444	myeloid leukocyte mediated immunity	7/321	107/18903	0.00233609099509343	0.0359257669951088	0.0277756075894758	6810/3965/8773/8673/3815/3565/57126	7
GO:0010906	BP	GO:0010906	regulation of glucose metabolic process	7/321	107/18903	0.00233609099509343	0.0359257669951088	0.0277756075894758	10447/3487/208/2308/8473/3486/5903	7
GO:0010506	BP	GO:0010506	regulation of autophagy	14/321	344/18903	0.00236874235521158	0.0359257669951088	0.0277756075894758	8678/11315/4102/54209/27074/9550/92140/23118/2309/2308/10241/3565/22930/4137	14
GO:0002448	BP	GO:0002448	mast cell mediated immunity	5/321	55/18903	0.00237722031791448	0.0359257669951088	0.0277756075894758	3965/8773/8673/3815/3565	5
GO:0043525	BP	GO:0043525	positive regulation of neuron apoptotic process	5/321	55/18903	0.00237722031791448	0.0359257669951088	0.0277756075894758	581/6733/2309/356/7020	5
GO:0055078	BP	GO:0055078	sodium ion homeostasis	5/321	55/18903	0.00237722031791448	0.0359257669951088	0.0277756075894758	481/7369/483/7380/4881	5
GO:1904645	BP	GO:1904645	response to amyloid-beta	5/321	55/18903	0.00237722031791448	0.0359257669951088	0.0277756075894758	142/54209/2309/4314/2043	5
GO:0010720	BP	GO:0010720	positive regulation of cell development	13/321	307/18903	0.00238261518188	0.0359257669951088	0.0277756075894758	5034/28988/5604/5501/7040/4747/23654/11344/8650/3815/4049/2043/4137	13
GO:1903201	BP	GO:1903201	regulation of oxidative stress-induced cell death	6/321	80/18903	0.00239802400892189	0.0360298855524895	0.0278561056952778	5034/142/11315/54209/2309/4314	6
GO:0007162	BP	GO:0007162	negative regulation of cell adhesion	13/321	308/18903	0.00245060552398047	0.0366089419030659	0.0283037966789663	8764/8379/3965/972/8763/7040/23654/84868/53827/3565/79679/2043/347	13
GO:0008637	BP	GO:0008637	apoptotic mitochondrial changes	7/321	108/18903	0.00246248488137214	0.0366089419030659	0.0283037966789663	400916/51024/9141/637/5329/581/93974	7
GO:0019882	BP	GO:0019882	antigen processing and presentation	7/321	108/18903	0.00246248488137214	0.0366089419030659	0.0283037966789663	1509/972/2923/54209/10890/8546/1515	7
GO:0005031	MF	GO:0005031	tumor necrosis factor receptor activity	3/321	10/18432	0.000573429723006208	0.036826931099732	0.0310523931873537	8764/60401/7132	3
GO:0002495	BP	GO:0002495	antigen processing and presentation of peptide antigen via MHC class II	4/321	34/18903	0.00253252388877692	0.0373878178283895	0.0289059759467221	1509/972/54209/1515	4
GO:0070570	BP	GO:0070570	regulation of neuron projection regeneration	4/321	34/18903	0.00253252388877692	0.0373878178283895	0.0289059759467221	8428/5604/56963/2043	4
GO:0072332	BP	GO:0072332	intrinsic apoptotic signaling pathway by p53 class mediator	6/321	81/18903	0.00255365626798233	0.0375688944702818	0.0290459733405008	60401/51246/581/972/7917/3190	6
GO:0019216	BP	GO:0019216	regulation of lipid metabolic process	14/321	347/18903	0.00256291687691341	0.0375746671539173	0.0290504364267147	2488/10577/972/7040/113791/54209/208/10464/4790/3815/2322/51083/338/347	14
GO:0001836	BP	GO:0001836	release of cytochrome c from mitochondria	5/321	56/18903	0.00257461733286363	0.037616047032218	0.0290824288198607	51024/9141/637/5329/581	5
GO:0000302	BP	GO:0000302	response to reactive oxygen species	10/321	204/18903	0.0026331696591226	0.0383393121845445	0.0296416132363521	8678/11315/10935/25824/8428/2309/4217/1956/4137/347	10
GO:0002020	MF	GO:0002020	protease binding	9/321	139/18432	0.000745680689908259	0.0386300343701831	0.0325727661872059	1471/11315/5269/4102/1476/7917/3815/6402/57126	9
GO:0034713	MF	GO:0034713	type I transforming growth factor beta receptor binding	3/321	11/18432	0.000778321819755885	0.0386300343701831	0.0325727661872059	7048/7040/4087	3
GO:0031625	MF	GO:0031625	ubiquitin protein ligase binding	14/321	299/18432	0.00080200763398304	0.0386300343701831	0.0325727661872059	8764/8678/10067/637/958/51035/7917/4055/29761/5094/9482/4087/2308/1956	14
GO:0051403	BP	GO:0051403	stress-activated MAPK cascade	11/321	239/18903	0.00268116323492637	0.0389044131040515	0.0300785147335648	60401/3965/5604/4055/54209/7430/2308/4217/4790/1956/23236	11
GO:0002705	BP	GO:0002705	positive regulation of leukocyte mediated immunity	8/321	140/18903	0.00272916242438021	0.0393581247386221	0.0304292968427492	6810/958/7040/54209/3815/3565/4049/57126	8
GO:1904035	BP	GO:1904035	regulation of epithelial cell apoptotic process	7/321	110/18903	0.00273100983553337	0.0393581247386221	0.0304292968427492	10413/958/581/6789/2309/3565/356	7
GO:0071732	BP	GO:0071732	cellular response to nitric oxide	3/321	17/18903	0.00276459816647539	0.0395729811870142	0.0305954107186039	2308/4314/1800	3
GO:1903729	BP	GO:1903729	regulation of plasma membrane organization	3/321	17/18903	0.00276459816647539	0.0395729811870142	0.0305954107186039	79026/4627/356	3
GO:0007080	BP	GO:0007080	mitotic metaphase plate congression	5/321	57/18903	0.00278363446750787	0.0395780511370163	0.0305993304941169	8678/8379/10540/9525/10464	5
GO:1903053	BP	GO:1903053	regulation of extracellular matrix organization	5/321	57/18903	0.00278363446750787	0.0395780511370163	0.0305993304941169	1471/7132/7040/23332/7148	5
GO:0030133	CC	GO:0030133	transport vesicle	15/324	423/19869	0.00421761523035701	0.0396408048402802	0.031898864269038	1211/6810/23557/972/10159/6272/10890/22872/163882/143187/57120/3382/762/4908/1363	15
GO:1904813	CC	GO:1904813	ficolin-1-rich granule lumen	7/324	124/19869	0.00425892944564994	0.0396408048402802	0.031898864269038	1471/28988/2720/1509/1476/4048/9535	7
GO:0001893	BP	GO:0001893	maternal placenta development	4/321	35/18903	0.00282156484306861	0.0398499008002723	0.0308095080408053	142/10935/682/8614	4
GO:0055075	BP	GO:0055075	potassium ion homeostasis	4/321	35/18903	0.00282156484306861	0.0398499008002723	0.0308095080408053	481/7369/483/7380	4
GO:0031970	CC	GO:0031970	organelle envelope lumen	6/324	94/19869	0.00439781233073391	0.0399163859879252	0.0321206237832369	400916/11315/57019/10989/4713/204	6
GO:0031253	CC	GO:0031253	cell projection membrane	13/324	344/19869	0.00445348108129744	0.0399163859879252	0.0321206237832369	6810/5064/10159/7430/7408/208/9342/151056/7369/1956/762/1800/4137	13
GO:0140029	BP	GO:0140029	exocytic process	6/321	83/18903	0.00288753044703895	0.0405853504255126	0.0313781127471511	6810/23557/10890/8773/8673/9342	6
GO:0019932	BP	GO:0019932	second-messenger-mediated signaling	13/321	314/18903	0.00289279580564192	0.0405853504255126	0.0313781127471511	51024/23576/5534/54209/10725/9693/683/481/775/51083/1956/4881/4137	13
GO:0006164	BP	GO:0006164	purine nucleotide biosynthetic process	11/321	242/18903	0.0029502638045422	0.0412550090423937	0.0318958518663725	6390/142/4726/4698/7040/23413/54209/4713/204/3565/4881	11
GO:1903532	BP	GO:1903532	positive regulation of secretion by cell	12/321	278/18903	0.00296170016543432	0.0412786960557408	0.0319141652175609	6810/9525/7040/54209/945/7430/8673/23332/3565/51083/22930/57126	12
GO:0001541	BP	GO:0001541	ovarian follicle development	5/321	58/18903	0.00300465728380299	0.0417401079064698	0.0322709006633129	2488/581/2309/3815/4254	5
GO:0140056	BP	GO:0140056	organelle localization by membrane tethering	6/321	84/18903	0.00306621510052968	0.0424560568004714	0.0328244285959696	6810/10890/8673/9482/9342/57488	6
GO:0002504	BP	GO:0002504	antigen processing and presentation of peptide or polysaccharide antigen via MHC class II	4/321	36/18903	0.00313239196439717	0.0429512775182874	0.0332073029916675	1509/972/54209/1515	4
GO:0071108	BP	GO:0071108	protein K48-linked deubiquitination	4/321	36/18903	0.00313239196439717	0.0429512775182874	0.0332073029916675	11315/51035/29761/9101	4
GO:0097345	BP	GO:0097345	mitochondrial outer membrane permeabilization	4/321	36/18903	0.00313239196439717	0.0429512775182874	0.0332073029916675	400916/637/581/93974	4
GO:1903078	BP	GO:1903078	positive regulation of protein localization to plasma membrane	5/321	59/18903	0.00323807143458637	0.043788638354816	0.0338546992187092	6810/54209/7430/163882/1956	5
GO:0071900	BP	GO:0071900	regulation of protein serine/threonine kinase activity	15/321	395/18903	0.00324465224843082	0.043788638354816	0.0338546992187092	958/5770/5604/7040/11140/9693/6789/4217/3815/2322/1956/7148/4254/4908/2043	15
GO:0010508	BP	GO:0010508	positive regulation of autophagy	8/321	144/18903	0.003245236795321	0.043788638354816	0.0338546992187092	8678/11315/92140/2309/2308/10241/3565/22930	8
GO:0050921	BP	GO:0050921	positive regulation of chemotaxis	8/321	144/18903	0.003245236795321	0.043788638354816	0.0338546992187092	6810/3965/972/7040/284340/54209/3565/4908	8
GO:0019081	BP	GO:0019081	viral translation	3/321	18/18903	0.00327613839001102	0.043788638354816	0.0338546992187092	6741/5094/7812	3
GO:0035234	BP	GO:0035234	ectopic germ cell programmed cell death	3/321	18/18903	0.00327613839001102	0.043788638354816	0.0338546992187092	581/3815/4254	3
GO:0048535	BP	GO:0048535	lymph node development	3/321	18/18903	0.00327613839001102	0.043788638354816	0.0338546992187092	7040/3575/4049	3
GO:0050746	BP	GO:0050746	regulation of lipoprotein metabolic process	3/321	18/18903	0.00327613839001102	0.043788638354816	0.0338546992187092	1622/22930/347	3
GO:0061025	BP	GO:0061025	membrane fusion	9/321	177/18903	0.00333373802252043	0.0443019014703447	0.0342515228937338	6810/23557/9135/8773/8673/9482/208/9342/143187	9
GO:0031098	BP	GO:0031098	stress-activated protein kinase signaling cascade	11/321	246/18903	0.00334247752748951	0.0443019014703447	0.0342515228937338	60401/3965/5604/4055/54209/7430/2308/4217/4790/1956/23236	11
GO:0060541	BP	GO:0060541	respiratory system development	10/321	211/18903	0.00335328831737547	0.0443019014703447	0.0342515228937338	5534/10413/7048/5604/7917/4048/10905/8546/1977/4087	10
GO:0032102	BP	GO:0032102	negative regulation of response to external stimulus	16/321	436/18903	0.0033563630804769	0.0443019014703447	0.0342515228937338	142/7132/3965/6480/5329/25817/284340/54209/84868/5094/7353/4790/23332/3565/56963/2043	16
GO:0014065	BP	GO:0014065	phosphatidylinositol 3-kinase signaling	8/321	145/18903	0.0033853798257716	0.0445461314341437	0.034440346576663	8678/56005/113791/54209/10617/3815/2322/1956	8
GO:0001671	MF	GO:0001671	ATPase activator activity	4/321	27/18432	0.00115458818206849	0.0446979246175771	0.0376891988671247	10294/10049/481/483	4
GO:0019903	MF	GO:0019903	protein phosphatase binding	9/321	149/18432	0.00122037215541797	0.0446979246175771	0.0376891988671247	5770/5501/945/2029/8546/2308/4217/1956/4137	9
GO:0030546	MF	GO:0030546	signaling receptor activator activity	19/321	498/18432	0.00123270941365538	0.0446979246175771	0.0376891988671247	2488/4043/10447/7040/25817/9518/9135/9535/9244/11009/8614/84432/3565/51083/1956/4254/4908/356/4049	19
GO:0004866	MF	GO:0004866	endopeptidase inhibitor activity	10/321	180/18432	0.00125648039277791	0.0446979246175771	0.0376891988671247	1471/10935/25824/5269/5037/1476/10406/1992/1474/1800	10
GO:0008253	MF	GO:0008253	5'-nucleotidase activity	3/321	13/18432	0.00131464484169344	0.0446979246175771	0.0376891988671247	30833/84618/51251	3
GO:0016197	BP	GO:0016197	endosomal transport	11/321	247/18903	0.00344679266730098	0.0447358163696841	0.0345869993770312	84661/137492/9525/51019/6272/10890/9779/51160/8546/143187/27236	11
GO:0031330	BP	GO:0031330	negative regulation of cellular catabolic process	11/321	247/18903	0.00344679266730098	0.0447358163696841	0.0345869993770312	1471/8678/11315/4102/51035/7917/54209/7812/1153/23118/8473	11
GO:0045921	BP	GO:0045921	positive regulation of exocytosis	6/321	86/18903	0.00344819561013953	0.0447358163696841	0.0345869993770312	6810/9525/8673/23332/3565/57126	6
GO:0032435	BP	GO:0032435	negative regulation of proteasomal ubiquitin-dependent protein catabolic process	4/321	37/18903	0.0034657788650835	0.0447358163696841	0.0345869993770312	11315/51035/7917/8473	4
GO:0045324	BP	GO:0045324	late endosome to vacuole transport	4/321	37/18903	0.0034657788650835	0.0447358163696841	0.0345869993770312	8678/137492/9525/51160	4
GO:0090151	BP	GO:0090151	establishment of protein localization to mitochondrial membrane	4/321	37/18903	0.0034657788650835	0.0447358163696841	0.0345869993770312	9141/9804/581/8546	4
GO:0002886	BP	GO:0002886	regulation of myeloid leukocyte mediated immunity	5/321	60/18903	0.00348426230870799	0.0447358163696841	0.0345869993770312	6810/3965/8673/3565/57126	5
GO:0006893	BP	GO:0006893	Golgi to plasma membrane transport	5/321	60/18903	0.00348426230870799	0.0447358163696841	0.0345869993770312	9135/10890/150684/163882/57120	5
GO:0007409	BP	GO:0007409	axonogenesis	16/321	438/18903	0.00350834575425253	0.0449089455008096	0.0347208522411636	8636/28988/5604/4747/682/23654/11344/10890/23077/7408/8650/1630/91653/10381/2043/4137	16
GO:0051051	BP	GO:0051051	negative regulation of transport	17/321	479/18903	0.00355920089936543	0.0453240753746738	0.0350418052907307	51024/7132/3965/11315/5534/4043/972/9525/945/8673/150684/208/2308/27236/57120/4790/347	17
GO:0002237	BP	GO:0002237	response to molecule of bacterial origin	14/321	360/18903	0.00356217066314996	0.0453240753746738	0.0350418052907307	3965/10935/7040/54209/84868/92140/23118/4790/11009/7369/338/356/4049/11093	14
GO:0017157	BP	GO:0017157	regulation of exocytosis	10/321	213/18903	0.00358546483485459	0.0454138896742213	0.0351112442185202	6810/3965/23557/9525/10890/8673/23332/3565/22930/57126	10
GO:0002706	BP	GO:0002706	regulation of lymphocyte mediated immunity	9/321	179/18903	0.00359066628295118	0.0454138896742213	0.0351112442185202	3965/4179/958/7040/54209/84868/3575/3565/4049	9
GO:0050672	BP	GO:0050672	negative regulation of lymphocyte proliferation	6/321	87/18903	0.00365194103905123	0.0460514112573216	0.0356041369471411	8764/8379/3965/84868/51083/79679	6
GO:0044389	MF	GO:0044389	ubiquitin-like protein ligase binding	14/321	318/18432	0.00144301332129097	0.0463367610947879	0.039071062441972	8764/8678/10067/637/958/51035/7917/4055/29761/5094/9482/4087/2308/1956	14
GO:0050673	BP	GO:0050673	epithelial cell proliferation	17/321	481/18903	0.0037109356527786	0.0466564817828573	0.0360719405011619	2488/637/10413/5604/581/56005/7040/3487/6789/1992/93974/10000/3815/3486/84432/1956/5923	17
GO:0048009	BP	GO:0048009	insulin-like growth factor receptor signaling pathway	4/321	38/18903	0.00382248617541883	0.0474584853700252	0.0366920006637066	3487/26058/3486/23236	4
GO:0032147	BP	GO:0032147	activation of protein kinase activity	8/321	148/18903	0.0038341286584735	0.0474584853700252	0.0366920006637066	11315/7048/5604/8795/10464/3565/1956/4908	8
GO:0002544	BP	GO:0002544	chronic inflammatory response	3/321	19/18903	0.0038419307250221	0.0474584853700252	0.0366920006637066	191/3565/4049	3
GO:0002923	BP	GO:0002923	regulation of humoral immune response mediated by circulating immunoglobulin	3/321	19/18903	0.0038419307250221	0.0474584853700252	0.0366920006637066	4179/54209/4049	3
GO:0014067	BP	GO:0014067	negative regulation of phosphatidylinositol 3-kinase signaling	3/321	19/18903	0.0038419307250221	0.0474584853700252	0.0366920006637066	113791/54209/10617	3
GO:0032930	BP	GO:0032930	positive regulation of superoxide anion generation	3/321	19/18903	0.0038419307250221	0.0474584853700252	0.0366920006637066	7040/57126/4137	3
GO:0032945	BP	GO:0032945	negative regulation of mononuclear cell proliferation	6/321	88/18903	0.00386449107021677	0.0475983972805478	0.0368001720027986	8764/8379/3965/84868/51083/79679	6
GO:0044548	MF	GO:0044548	S100 protein binding	3/321	14/18432	0.0016517132884371	0.047629656894666	0.0401612295433079	79026/7430/311	3
GO:0030414	MF	GO:0030414	peptidase inhibitor activity	10/321	187/18432	0.00167091644214183	0.047629656894666	0.0401612295433079	1471/10935/25824/5269/5037/1476/10406/1992/1474/1800	10
GO:0051721	MF	GO:0051721	protein phosphatase 2A binding	4/321	30/18432	0.00173048926433908	0.047629656894666	0.0401612295433079	5770/2029/2308/4137	4
GO:0072522	BP	GO:0072522	purine-containing compound biosynthetic process	11/321	251/18903	0.00389046302556808	0.0477793966357448	0.0369401096432277	6390/142/4726/4698/7040/23413/54209/4713/204/3565/4881	11
GO:0007249	BP	GO:0007249	I-kappaB kinase/NF-kappaB signaling	12/321	288/18903	0.00393253601761266	0.0481565176492048	0.0372316765646809	60401/7132/3965/51246/958/972/8795/4055/54209/92140/23118/356	12
GO:0002820	BP	GO:0002820	negative regulation of adaptive immune response	5/321	62/18903	0.00401651237687171	0.0489021923586363	0.0378081866812606	8764/4179/84868/3575/3565	5
GO:0043030	BP	GO:0043030	regulation of macrophage activation	5/321	62/18903	0.00401651237687171	0.0489021923586363	0.0378081866812606	972/54209/1075/84868/3565	5

## Sheet: KEGG (44.5-year peak)
	ID	Description	GeneRatio	BgRatio	pvalue	p.adjust	qvalue	geneID	Count	kegg_class
hsa04210	hsa04210	Apoptosis	22/281	196/11016	5.11470891355719e-09	1.48838029384514e-06	8.77576371484023e-07	P09874/P19438/A8ASI8/B3KT21/P55957/P20700/P07339/V9HWI3/A4QPA9/Q02750/Q07812/O14763/Q7Z2I8/P53634/P31751/Q9Y243/Q99683/P19838/B2R717/O60911/P48023/Q53ZZ1	22	Cellular Processes; Cell growth and death
hsa04010	hsa04010	MAPK signaling pathway	31/281	420/11016	9.55296592045955e-08	1.36526802162468e-05	8.04987113491855e-06	P19438/P63098/P37173/A3QNQ0/A4QPA9/Q02750/P01137/P61244/Q9Y4G8/Q13043/P31751/Q9NYJ8/Q9Y243/Q99683/P19838/P10721/Q13936/Q59GU3/Q5V9X9/P36888/Q15256/Q504U8/F2YGG7/P00533/P21583/A8K270/Q13972/P20783/P48023/Q53ZZ1/P10636	31	Environmental Information Processing; Signal transduction
hsa04926	hsa04926	Relaxin signaling pathway	20/281	197/11016	1.40749280579864e-07	1.36526802162468e-05	8.04987113491855e-06	P37173/A3QNQ0/D2JYH4/P62736/A4QPA9/Q02750/P01137/Q15796/Q53XR6/P31751/Q9Y243/P19838/P53420/A0A0S2Z3H8/O95467/P63092/Q504U8/F2YGG7/P00533/Q9NQ66	20	Organismal Systems; Endocrine system
hsa04270	hsa04270	Vascular smooth muscle contraction	19/281	186/11016	2.64635303338666e-07	1.92522183178879e-05	1.13514616958428e-05	D2JYH4/P62736/P35579/A4QPA9/Q02750/P36873/B4E2K6/Q9NZN5/B2RAH5/O14974/Q13936/Q59GU3/Q5V9X9/A0A0S2Z3H8/O95467/P63092/A0A140VJE6/P16066/Q9NQ66	19	Organismal Systems; Circulatory system
hsa05212	hsa05212	Pancreatic cancer	14/281	120/11016	2.12249035811315e-06	9.40750935864659e-05	5.54684038871186e-05	P37173/A3QNQ0/A4QPA9/Q02750/Q07812/P01137/Q15796/Q53XR6/P31751/Q9Y243/P19838/Q504U8/F2YGG7/P00533	14	Human Diseases; Cancer: specific types
hsa04142	hsa04142	Lysosome	17/281	174/11016	2.12909271089159e-06	9.40750935864659e-05	5.54684038871186e-05	P09496/A0A024R6C0/P61916/Q14108/P16278/P07339/V9HWI3/Q04900/P08962/Q99523/P53634/Q9UQV4/A0A0S2Z5J4/O00203/B2R717/O60911/P22304	17	Cellular Processes; Transport and catabolism
hsa05210	hsa05210	Colorectal cancer	15/281	138/11016	2.26297475981189e-06	9.40750935864659e-05	5.54684038871186e-05	P37173/A3QNQ0/A4QPA9/Q02750/Q07812/P01137/Q15796/Q53XR6/P31751/Q9Y243/P43146/Q49AK4/Q504U8/F2YGG7/P00533	15	Human Diseases; Cancer: specific types
hsa04611	hsa04611	Platelet activation	17/281	179/11016	3.14563025898503e-06	0.00011442230067058	6.74654910808631e-05	P36873/B4E2K6/Q9NZN5/A8K287/O00161/Q9BV40/A0A024R0V4/P50552/P31751/Q9Y243/B2RAH5/O14974/A0A0S2Z3H8/O95467/P63092/Q76LX8/Q9NQ66	17	Organismal Systems; Immune system
hsa05163	hsa05163	Human cytomegalovirus infection	24/281	344/11016	7.65900417505805e-06	0.000224418798560105	0.000132321447514187	P19438/A8ASI8/B3KT21/P55957/P63098/A4QPA9/Q02750/Q07812/P30101/V9HVY3/B4E2K6/Q9NZN5/P31751/Q9Y243/P19838/A0A0S2Z3H8/O95467/P63092/Q504U8/F2YGG7/P00533/P48023/Q53ZZ1/Q9NQ66	24	Human Diseases; Infectious disease: viral
hsa04921	hsa04921	Oxytocin signaling pathway	18/281	213/11016	8.42938679181908e-06	0.000224418798560105	0.000132321447514187	P63098/A4QPA9/Q02750/P36873/B2RAH5/O14974/Q13936/Q59GU3/Q5V9X9/A0A0S2Z3H8/O95467/P63092/Q504U8/F2YGG7/P00533/A0A140VJE6/P16066/Q9NQ66	18	Organismal Systems; Endocrine system
hsa01232	hsa01232	Nucleotide metabolism	13/281	117/11016	8.48318482529607e-06	0.000224418798560105	0.000132321447514187	Q9H773/P23919/Q6FGU2/Q8TCD5/V9HWF3/Q9BXI3/Q9H0P0/Q9BY32/A0A0S2Z3W7/P32321/Q9P2T1/P54819/A0A140VK93	13	no
hsa04022	hsa04022	cGMP-PKG signaling pathway	19/281	236/11016	9.52429557667522e-06	0.000230964167734374	0.00013618071745597	P63098/A4QPA9/Q02750/P36873/A0A024R0V4/P50552/P31751/Q9Y243/B2RAH5/O14974/A3KLL5/P05026/Q13936/Q59GU3/Q5V9X9/P54709/A0A140VJE6/P16066/Q9NQ66	19	Environmental Information Processing; Signal transduction
hsa04912	hsa04912	GnRH signaling pathway	14/281	140/11016	1.30795449594558e-05	0.000277918518289976	0.000163865865369022	A0A0F7RQE8/P01225/A4QPA9/Q02750/Q13936/Q59GU3/Q5V9X9/A0A0S2Z3H8/O95467/P63092/Q504U8/F2YGG7/P00533/Q9NQ66	14	Organismal Systems; Endocrine system
hsa05417	hsa05417	Lipid and atherosclerosis	23/281	332/11016	1.33706503644662e-05	0.000277918518289976	0.000163865865369022	P19438/A8ASI8/B3KT21/P55957/P63098/A0A0S2Z3C7/P25942/Q6P2H9/Q07812/O14763/Q7Z2I8/P31751/Q9NYJ8/Q9Y243/Q99683/P19838/P04114/Q59HB3/Q7Z7Q0/P48023/Q53ZZ1/P08254/Q9NQ66	23	Human Diseases; Cardiovascular disease
hsa05142	hsa05142	Chagas disease	15/281	163/11016	1.75968617625371e-05	0.000341379118193221	0.000201283401213583	P19438/P37173/A3QNQ0/P01137/Q15796/Q53XR6/P31751/Q9Y243/P19838/A0A0S2Z3H8/O95467/P63092/P48023/Q53ZZ1/Q9NQ66	15	Human Diseases; Infectious disease: parasitic
hsa04068	hsa04068	FoxO signaling pathway	16/281	188/11016	2.46331466933282e-05	0.000448015355484907	0.000264158086250822	P37173/A3QNQ0/A4QPA9/Q02750/P01137/Q13043/P31751/O43524/Q12778/Q9Y243/P16871/Q504U8/F2YGG7/P00533/P48023/Q53ZZ1	16	Environmental Information Processing; Signal transduction
hsa04932	hsa04932	Non-alcoholic fatty liver disease	17/281	220/11016	4.76107436081629e-05	0.00081498390529267	0.000480529486571551	P21912/P19438/A8ASI8/B3KT21/P55957/O75380/Q6IBC4/Q07812/Q16718/P01137/P31751/P17568/Q9Y243/Q99683/P19838/P48023/Q53ZZ1	17	Human Diseases; Endocrine and metabolic disease
hsa04130	hsa04130	SNARE interactions in vesicular transport	7/281	41/11016	6.96909148077656e-05	0.00112648731256438	0.000664197619634633	Q12846/A8K287/O00161/Q9BV40/Q9UNK0/O95721/Q96AJ9	7	Genetic Information Processing; Folding, sorting and degradation
hsa05205	hsa05205	Proteoglycans in cancer	20/281	297/11016	7.35507180024855e-05	0.00112648731256438	0.000664197619634633	Q03405/A4QPA9/Q02750/P36873/P01137/P08962/P15311/B4E2K6/Q9NZN5/Q15796/Q53XR6/P31751/Q9Y243/B2RAH5/O14974/Q504U8/F2YGG7/P00533/P48023/Q53ZZ1	20	Human Diseases; Cancer: overview
hsa04064	hsa04064	NF-kappa B signaling pathway	12/281	133/11016	0.000147625875074176	0.00206196161663914	0.00121577045943997	P09874/B2RBZ9/Q9HAV5/P19438/A0A0S2Z3C7/P25942/Q6P2H9/P36941/Q9NYJ8/P19838/P01374/Q5STV3	12	Environmental Information Processing; Signal transduction
hsa04215	hsa04215	Apoptosis - multiple species	7/281	46/11016	0.000148801353778082	0.00206196161663914	0.00121577045943997	A0A024R1X5/Q14457/P19438/A8ASI8/B3KT21/P55957/Q07812	7	Cellular Processes; Cell growth and death
hsa04964	hsa04964	Proximal tubule bicarbonate reclamation	6/281	33/11016	0.000161906943242667	0.00214158729470982	0.00126271922241888	P40925/V9HWF2/A3KLL5/P05026/P54709/P22748	6	Organismal Systems; Excretory system
hsa04071	hsa04071	Sphingolipid signaling pathway	14/281	177/11016	0.000173495403517066	0.00219509401841158	0.00129426776994425	P19438/A8ASI8/B3KT21/P55957/P07339/V9HWI3/A4QPA9/Q02750/Q07812/P31751/Q9Y243/Q99683/P19838/Q9NQ66	14	Environmental Information Processing; Signal transduction
hsa04024	hsa04024	cAMP signaling pathway	21/281	345/11016	0.000202353737125031	0.002453539062641	0.00144665171716579	A0A0F7RQE8/P01225/A4QPA9/Q02750/P36873/P31751/Q9Y243/B2RAH5/O14974/P19838/A3KLL5/P05026/Q13936/Q59GU3/Q5V9X9/A0A0S2Z3H8/O95467/P63092/P54709/A0A140VJE6/P16066	21	Environmental Information Processing; Signal transduction
hsa04924	hsa04924	Renin secretion	10/281	100/11016	0.000227428126467151	0.00264726339207764	0.00156087514164824	P63098/Q13936/Q59GU3/Q5V9X9/A0A0S2Z3H8/O95467/P63092/A0A140VJE6/P16066/Q9NQ66	10	Organismal Systems; Endocrine system
hsa05160	hsa05160	Hepatitis C	16/281	231/11016	0.000282185049713803	0.00314357891741299	0.0018535118955989	P19438/A8ASI8/B3KT21/P55957/A4QPA9/Q02750/Q07812/P27348/P31751/Q9Y243/P19838/Q504U8/F2YGG7/P00533/P48023/Q53ZZ1	16	Human Diseases; Infectious disease: viral
hsa04925	hsa04925	Aldosterone synthesis and secretion	12/281	143/11016	0.000291672270687803	0.00314357891741299	0.0018535118955989	A3KLL5/P05026/Q13936/Q59GU3/Q5V9X9/A0A0S2Z3H8/O95467/P63092/P54709/A0A140VJE6/P16066/Q9NQ66	12	Organismal Systems; Endocrine system
hsa04060	hsa04060	Cytokine-cytokine receptor interaction	23/281	408/11016	0.000309867953564256	0.00319277523276708	0.00188251894715512	Q92956/B2RBZ9/Q9HAV5/P19438/P37173/A3QNQ0/A0A0S2Z3C7/P25942/Q6P2H9/O14763/Q7Z2I8/P01137/Q99988/P36941/Q6UXB2/P16871/Q13007/D4HNR6/P05112/P48023/Q53ZZ1/P01374/Q5STV3	23	Environmental Information Processing; Signaling molecules and interaction
hsa04961	hsa04961	Endocrine and other factor-regulated calcium reabsorption	8/281	68/11016	0.0003181803496572	0.00319277523276708	0.00188251894715512	P09496/A3KLL5/P05026/A0A0S2Z3H8/O95467/P63092/P54709/Q9NQ66	8	Organismal Systems; Excretory system
hsa04540	hsa04540	Gap junction	11/281	127/11016	0.000395866730454585	0.00383990728540947	0.00226407989698587	A4QPA9/Q02750/A0A0S2Z3H8/O95467/P63092/Q504U8/F2YGG7/P00533/Q13509/Q53G92/Q9NQ66	11	Cellular Processes; Cellular community - eukaryotes
hsa05161	hsa05161	Hepatitis B	16/281	241/11016	0.000452643466048105	0.00424900801999995	0.00250529320766863	A8ASI8/B3KT21/P55957/P37173/A3QNQ0/A4QPA9/Q02750/Q07812/P01137/P27348/P31751/Q9NYJ8/Q9Y243/P19838/P48023/Q53ZZ1	16	Human Diseases; Infectious disease: viral
hsa04218	hsa04218	Cellular senescence	16/281	242/11016	0.000473763567435071	0.00430828744136267	0.00254024544381304	P63098/P37173/A3QNQ0/A4QPA9/Q02750/P36873/P01137/Q15796/Q53XR6/P31751/O43524/Q12778/Q9Y243/P19838/B3KPF0/P17936	16	Cellular Processes; Cell growth and death
hsa04115	hsa04115	p53 signaling pathway	9/281	92/11016	0.000548684457104296	0.00483839930355606	0.00285280913901117	Q8N114/A8ASI8/B3KT21/P55957/Q07812/O14763/Q7Z2I8/B3KPF0/P17936	9	Cellular Processes; Cell growth and death
hsa04934	hsa04934	Cushing syndrome	15/281	223/11016	0.000592479433267092	0.00507092691413893	0.00298991169110019	A4QPA9/Q02750/A0A0S2Z4C3/P07954/P40818/Q13936/Q59GU3/Q5V9X9/A0A0S2Z3H8/O95467/P63092/Q504U8/F2YGG7/P00533/Q9NQ66	15	Human Diseases; Endocrine and metabolic disease
hsa05166	hsa05166	Human T-cell leukemia virus 1 infection	21/281	375/11016	0.000616030331478874	0.0051218521845815	0.00301993816634756	P19438/Q9Y6D9/Q8NHZ8/P63098/P37173/A3QNQ0/A0A0S2Z3C7/P25942/Q6P2H9/A4QPA9/Q02750/Q07812/P01137/P36941/Q15796/Q53XR6/P31751/Q9Y243/P19838/P01374/Q5STV3	21	Human Diseases; Infectious disease: viral
hsa05223	hsa05223	Non-small cell lung cancer	10/281	115/11016	0.000700731818650516	0.005664248867425	0.00333974521754486	A4QPA9/Q02750/Q07812/Q13043/P31751/O43524/Q9Y243/Q504U8/F2YGG7/P00533	10	Human Diseases; Cancer: specific types
hsa00240	hsa00240	Pyrimidine metabolism	8/281	77/11016	0.00074339259723985	0.00573955148534498	0.00338414502481907	Q9H773/P23919/Q6FGU2/Q8TCD5/V9HWF3/Q9BXI3/Q9H0P0/P32321	8	Metabolism; Nucleotide metabolism
hsa05213	hsa05213	Endometrial cancer	9/281	96/11016	0.000749494695680788	0.00573955148534498	0.00338414502481907	A4QPA9/Q02750/Q07812/P31751/O43524/Q9Y243/Q504U8/F2YGG7/P00533	9	Human Diseases; Cancer: specific types
hsa05168	hsa05168	Herpes simplex virus 1 infection	18/281	305/11016	0.000824412370171604	0.00596237810826636	0.0035155276963191	Q92956/P19438/A8ASI8/B3KT21/P55957/Q07812/P04233/P36873/P30101/V9HVY3/P31751/Q9NYJ8/Q9Y243/P19838/P48023/Q53ZZ1/P01374/Q5STV3	18	Human Diseases; Infectious disease: viral
hsa04933	hsa04933	AGE-RAGE signaling pathway in diabetic complications	12/281	161/11016	0.000851591639188943	0.00596237810826636	0.0035155276963191	P37173/A3QNQ0/Q07812/P01137/Q15796/Q53XR6/P31751/Q12778/Q9Y243/P19838/P53420/Q9NQ66	12	Human Diseases; Endocrine and metabolic disease
hsa01521	hsa01521	EGFR tyrosine kinase inhibitor resistance	10/281	118/11016	0.000856919247072103	0.00596237810826636	0.0035155276963191	A4QPA9/Q02750/Q07812/P06730/P31751/O43524/Q9Y243/Q504U8/F2YGG7/P00533	10	Human Diseases; Drug resistance: antineoplastic
hsa05208	hsa05208	Chemical carcinogenesis - reactive oxygen species	19/281	332/11016	0.000860549417687928	0.00596237810826636	0.0035155276963191	P21912/O75380/Q6IBC4/P18031/A8K3M3/A4QPA9/Q02750/Q16718/P24666/Q59EH3/P31751/P17568/O43524/Q9Y243/Q99683/P19838/Q504U8/F2YGG7/P00533	19	Human Diseases; Cancer: overview
hsa05415	hsa05415	Diabetic cardiomyopathy	18/281	313/11016	0.00110902219535865	0.00750524322905505	0.00442522932297332	P21912/P09874/P37173/A3QNQ0/O75380/Q6IBC4/P07339/V9HWI3/P36873/Q16718/P01137/Q15796/Q53XR6/P31751/P17568/Q9Y243/P19838/Q9NQ66	18	Human Diseases; Cardiovascular disease
hsa04911	hsa04911	Insulin secretion	10/281	123/11016	0.00118017242815637	0.007805231286216	0.0046021077940069	A3KLL5/P05026/Q13936/Q59GU3/Q5V9X9/A0A0S2Z3H8/O95467/P63092/P54709/Q9NQ66	10	Organismal Systems; Endocrine system
hsa04935	hsa04935	Growth hormone synthesis, secretion and action	13/281	191/11016	0.00121967892228888	0.00788725703080143	0.00465047168030614	A4QPA9/Q02750/P31751/Q9Y243/B3KPF0/P17936/Q13936/Q59GU3/Q5V9X9/A0A0S2Z3H8/O95467/P63092/Q9NQ66	13	Organismal Systems; Endocrine system
hsa04977	hsa04977	Vitamin digestion and absorption	5/281	33/11016	0.00137684865848962	0.00871006433957567	0.00513561398933201	B2RWP8/Q6P1J6/P04114/Q59HB3/Q7Z7Q0	5	Organismal Systems; Digestive system
hsa04380	hsa04380	Osteoclast differentiation	13/281	195/11016	0.00147184999603191	0.00911294359245288	0.00537315900007169	P19438/P63098/P37173/A3QNQ0/A4QPA9/Q02750/P01137/Q9NZC2/Q5TCX1/P31751/Q9NYJ8/Q9Y243/P19838	13	Organismal Systems; Development and regeneration
hsa01522	hsa01522	Endocrine resistance	11/281	150/11016	0.00158249825749374	0.00959389568605581	0.00565673719235702	A4QPA9/Q02750/Q07812/P31751/Q9Y243/A0A0S2Z3H8/O95467/P63092/Q504U8/F2YGG7/P00533	11	Human Diseases; Drug resistance: antineoplastic
hsa04970	hsa04970	Salivary secretion	10/281	132/11016	0.00200985489728082	0.0119360770430351	0.00703773035997365	A0A0K0K1J1/P01034/Q10588/A3KLL5/P05026/A0A0S2Z3H8/O95467/P63092/P54709/Q9NQ66	10	Organismal Systems; Digestive system
hsa00730	hsa00730	Thiamine metabolism	4/281	22/11016	0.00210885837020206	0.012273555714576	0.00723671398616706	P24666/Q59EH3/P54819/A0A140VK93	4	Metabolism; Metabolism of cofactors and vitamins
hsa04144	hsa04144	Endocytosis	18/281	333/11016	0.00220824290098349	0.0124086281748388	0.00731635519080748	P09496/P37173/A3QNQ0/Q8NEZ2/O75351/Q9Y3C0/Q15276/P61026/P40818/Q548N1/Q9UK41/Q15796/Q53XR6/A0A140VK54/O95630/Q504U8/F2YGG7/P00533	18	Cellular Processes; Transport and catabolism
hsa04722	hsa04722	Neurotrophin signaling pathway	12/281	180/11016	0.00221734936457601	0.0124086281748388	0.00731635519080748	A4QPA9/Q02750/Q07812/Q99523/P31751/O43524/Q9Y243/Q99683/P19838/P20783/P48023/Q53ZZ1	12	Organismal Systems; Nervous system
hsa05164	hsa05164	Influenza A	16/281	281/11016	0.00228752935999682	0.0125598310143222	0.00740550716344551	P19438/Q9BUJ2/A8ASI8/B3KT21/P55957/A4QPA9/Q02750/Q07812/O14763/Q7Z2I8/P31751/Q9Y243/Q13137/P19838/P48023/Q53ZZ1	16	Human Diseases; Infectious disease: viral
hsa04015	hsa04015	Rap1 signaling pathway	17/281	309/11016	0.00242046130673588	0.0130435970418545	0.00769074450288399	A4QPA9/Q02750/Q9Y4G8/O15117/A0A024R0V4/P50552/P31751/Q9Y243/P10721/A0A0S2Z3H8/O95467/P63092/Q504U8/F2YGG7/P00533/P21583/Q9NQ66	17	Environmental Information Processing; Signal transduction
hsa04915	hsa04915	Estrogen signaling pathway	13/281	208/11016	0.00260798938938475	0.013582718907772	0.0080086206618442	P07339/V9HWI3/A4QPA9/Q02750/P31751/Q9Y243/A0A0S2Z3H8/O95467/P63092/Q504U8/F2YGG7/P00533/Q9NQ66	13	Organismal Systems; Endocrine system
hsa01524	hsa01524	Platinum drug resistance	9/281	115/11016	0.00267290557990901	0.013582718907772	0.0080086206618442	A8ASI8/B3KT21/P55957/Q07812/P31751/Q9Y243/Q99683/P48023/Q53ZZ1	9	Human Diseases; Drug resistance: antineoplastic
hsa05230	hsa05230	Central carbon metabolism in cancer	9/281	115/11016	0.00267290557990901	0.013582718907772	0.0080086206618442	A4QPA9/Q02750/P31751/Q9Y243/P10721/P36888/Q504U8/F2YGG7/P00533	9	Human Diseases; Cancer: overview
hsa04141	hsa04141	Protein processing in endoplasmic reticulum	14/281	234/11016	0.00270720857955592	0.013582718907772	0.0080086206618442	A0A024R8S5/P07237/O60884/Q07812/Q04323/P30101/V9HVY3/O60476/Q07065/O94979/Q92890/Q541A5/Q99683/P54727	14	Genetic Information Processing; Folding, sorting and degradation
hsa04668	hsa04668	TNF signaling pathway	11/281	163/11016	0.00304532441515253	0.0150201594035489	0.00885616199232583	P19438/A4QPA9/Q02750/P31751/Q9NYJ8/Q9Y243/Q99683/P19838/P01374/Q5STV3/P08254	11	Environmental Information Processing; Signal transduction
hsa05202	hsa05202	Transcriptional misregulation in cancer	14/281	238/11016	0.00315707765712822	0.0151473831638435	0.00893117545923853	P37173/A3QNQ0/A0A0S2Z3C7/P25942/Q6P2H9/Q07812/P61244/Q12778/P19838/B3KPF0/P17936/P36888/P08254/Q15652	14	Human Diseases; Cancer: overview
hsa04979	hsa04979	Cholesterol metabolism	7/281	76/11016	0.00317522464946548	0.0151473831638435	0.00893117545923853	A0A024R6C0/P61916/P30533/Q99523/P04114/Q59HB3/Q7Z7Q0	7	Organismal Systems; Digestive system
hsa04072	hsa04072	Phospholipase D signaling pathway	13/281	214/11016	0.0033339479415432	0.0155512165617177	0.00916928305140166	A4QPA9/Q02750/P31751/Q9Y243/P10721/A0A0S2Z3H8/O95467/P63092/Q504U8/F2YGG7/P00533/P21583/Q9NQ66	13	Environmental Information Processing; Signal transduction
hsa05220	hsa05220	Chronic myeloid leukemia	9/281	119/11016	0.00336675822470177	0.0155512165617177	0.00916928305140166	P37173/A3QNQ0/A4QPA9/Q02750/Q07812/P01137/P31751/Q9Y243/P19838	9	Human Diseases; Cancer: specific types
hsa04261	hsa04261	Adrenergic signaling in cardiomyocytes	13/281	217/11016	0.00375425278362364	0.0170701181255387	0.0100648553245173	P36873/P31751/Q9Y243/A3KLL5/P05026/Q13936/Q59GU3/Q5V9X9/A0A0S2Z3H8/O95467/P63092/P54709/Q9NQ66	13	Organismal Systems; Circulatory system
hsa05130	hsa05130	Pathogenic Escherichia coli infection	15/281	273/11016	0.00433383881383341	0.0191934092618579	0.0113167867957418	Q8WUW1/P19438/P35579/Q07812/O14763/Q7Z2I8/P15311/B4E2K6/Q9NZN5/Q9NYJ8/P19838/P48023/Q53ZZ1/Q13509/Q53G92	15	Human Diseases; Infectious disease: bacterial
hsa04510	hsa04510	Focal adhesion	16/281	300/11016	0.0043531443686688	0.0191934092618579	0.0113167867957418	A4QPA9/Q02750/P36873/A0A024R0V4/P50552/P31751/Q9Y243/B2RAH5/O14974/P53420/Q504U8/F2YGG7/P00533/P22105/A8K270/Q13972	16	Cellular Processes; Cellular community - eukaryotes
hsa04929	hsa04929	GnRH secretion	8/281	102/11016	0.00448860570061947	0.0194952874459741	0.0114947797203609	A4QPA9/Q02750/P31751/Q9Y243/Q13936/Q59GU3/Q5V9X9/Q9NQ66	8	Organismal Systems; Endocrine system
hsa04014	hsa04014	Ras signaling pathway	17/281	331/11016	0.00486906113068724	0.0208367174857351	0.0122857115217031	A4QPA9/Q02750/Q13043/P31751/Q9Y243/P19838/P10721/P36888/Q504U8/F2YGG7/P00533/P21583/A8K270/Q13972/P20783/P48023/Q53ZZ1	17	Environmental Information Processing; Signal transduction
hsa04728	hsa04728	Dopaminergic synapse	12/281	200/11016	0.00521116184470759	0.0216860923737196	0.0127865185636328	P36873/A0A140VJG8/P21964/P31751/Q9Y243/Q13936/Q59GU3/Q5V9X9/A0A0S2Z3H8/O95467/P63092/Q9NQ66	12	Organismal Systems; Nervous system
hsa00230	hsa00230	Purine metabolism	11/281	175/11016	0.00521658579436554	0.0216860923737196	0.0127865185636328	Q9UKK9/Q8TCD5/V9HWF3/Q9BXI3/Q9BY32/A0A0S2Z3W7/Q9P2T1/P54819/A0A140VK93/A0A140VJE6/P16066	11	Metabolism; Nucleotide metabolism
hsa05215	hsa05215	Prostate cancer	10/281	151/11016	0.0052952171465122	0.021702932248381	0.01279644766318	A4QPA9/Q02750/P31751/Q12778/Q9Y243/P19838/Q504U8/F2YGG7/P00533/P08254	10	Human Diseases; Cancer: specific types
hsa04720	hsa04720	Long-term potentiation	8/281	106/11016	0.00565895895909624	0.022871625793014	0.0134855308528171	P63098/A4QPA9/Q02750/P36873/Q13936/Q59GU3/Q5V9X9/Q9NQ66	8	Organismal Systems; Nervous system
hsa05226	hsa05226	Gastric cancer	13/281	229/11016	0.00588574973695762	0.0234237022050956	0.0138110452502463	P37173/A3QNQ0/A4QPA9/Q02750/Q07812/P01137/Q15796/Q53XR6/P31751/Q9Y243/Q504U8/F2YGG7/P00533	13	Human Diseases; Cancer: specific types
hsa04931	hsa04931	Insulin resistance	10/281	154/11016	0.00606961541939879	0.0234237022050956	0.0138110452502463	P19438/P18031/A8K3M3/P36873/O60502/P31751/Q12778/Q9Y243/P19838/O15294	10	Human Diseases; Endocrine and metabolic disease
hsa00020	hsa00020	Citrate cycle (TCA cycle)	5/281	46/11016	0.00607689153240563	0.0234237022050956	0.0138110452502463	P21912/P40925/V9HWF2/A0A0S2Z4C3/P07954	5	Metabolism; Carbohydrate metabolism
hsa05219	hsa05219	Bladder cancer	6/281	65/11016	0.00611753047280848	0.0234237022050956	0.0138110452502463	A4QPA9/Q02750/Q504U8/F2YGG7/P00533/O75631	6	Human Diseases; Cancer: specific types
hsa05031	hsa05031	Amphetamine addiction	8/281	109/11016	0.00667939748111049	0.0252429177532877	0.0148836881670678	P63098/P36873/Q13936/Q59GU3/Q5V9X9/A0A0S2Z3H8/O95467/P63092	8	Human Diseases; Substance dependence
hsa04971	hsa04971	Gastric acid secretion	8/281	110/11016	0.00704872950317681	0.0262971831464673	0.015505302415895	P15311/A3KLL5/P05026/A0A0S2Z3H8/O95467/P63092/P54709/Q9NQ66	8	Organismal Systems; Digestive system
hsa04140	hsa04140	Autophagy - animal	13/281	235/11016	0.00726558473477953	0.026763103263555	0.0157800174786018	A0A024R1X5/Q14457/P07339/V9HWI3/A4QPA9/Q02750/Q86VP1/Q9H8Y8/Q9BV40/P31751/O95721/Q9Y243/Q13137	13	Cellular Processes; Transport and catabolism
hsa04923	hsa04923	Regulation of lipolysis in adipocytes	7/281	89/11016	0.00757113582640079	0.0271647481904494	0.0160168347080602	P31751/Q9Y243/A0A0S2Z3H8/O95467/P63092/A0A140VJE6/P16066	7	Organismal Systems; Endocrine system
hsa04973	hsa04973	Carbohydrate digestion and absorption	6/281	68/11016	0.00761007443274893	0.0271647481904494	0.0160168347080602	P31751/Q9Y243/A3KLL5/P05026/P54709/Q9NQ66	6	Organismal Systems; Digestive system
hsa05235	hsa05235	PD-L1 expression and PD-1 checkpoint pathway in cancer	9/281	135/11016	0.00765874463272998	0.0271647481904494	0.0160168347080602	P63098/A4QPA9/Q02750/P31751/Q9Y243/P19838/Q504U8/F2YGG7/P00533	9	Human Diseases; Cancer: overview
hsa05170	hsa05170	Human immunodeficiency virus 1 infection	16/281	319/11016	0.00774802096153712	0.0271647481904494	0.0160168347080602	P19438/A8ASI8/B3KT21/P55957/P63098/A4QPA9/Q02750/Q07812/P30101/V9HVY3/P31751/Q9NYJ8/Q9Y243/P19838/P48023/Q53ZZ1	16	Human Diseases; Infectious disease: viral
hsa05152	hsa05152	Tuberculosis	15/281	293/11016	0.0081834129645586	0.0283496806272209	0.0167154926469054	P19438/A8ASI8/B3KT21/P55957/P63098/P07339/V9HWI3/Q07812/P04233/P01137/B4E2K6/Q9NZN5/P31751/Q9Y243/P19838	15	Human Diseases; Infectious disease: bacterial
hsa05214	hsa05214	Glioma	8/281	115/11016	0.00913143538634321	0.0312157721947521	0.0184053929019519	A4QPA9/Q02750/Q07812/P31751/Q9Y243/Q504U8/F2YGG7/P00533	8	Human Diseases; Cancer: specific types
hsa05165	hsa05165	Human papillomavirus infection	21/281	471/11016	0.00922527975515011	0.0312157721947521	0.0184053929019519	P19438/A4QPA9/Q02750/Q07812/A8K899/O75528/O75348/P31751/Q12778/Q9Y243/P19838/P53420/A0A0S2Z3H8/O95467/P63092/Q504U8/F2YGG7/P00533/P22105/P48023/Q53ZZ1	21	Human Diseases; Infectious disease: viral
hsa04520	hsa04520	Adherens junction	9/281	140/11016	0.0096189997781895	0.0321738958098063	0.0189703201917107	P37173/A3QNQ0/P18031/A8K3M3/P24666/Q59EH3/Q504U8/F2YGG7/P00533	9	Cellular Processes; Cellular community - eukaryotes
hsa05225	hsa05225	Hepatocellular carcinoma	13/281	244/11016	0.00980321208180084	0.0324174399523187	0.0191139182934634	P37173/A3QNQ0/A4QPA9/Q02750/Q07812/P01137/Q15796/Q53XR6/P31751/Q9Y243/Q504U8/F2YGG7/P00533	13	Human Diseases; Cancer: specific types
hsa05218	hsa05218	Melanoma	8/281	119/11016	0.0111038055511768	0.0363057012965442	0.0214065086320735	A4QPA9/Q02750/Q07812/P31751/Q9Y243/Q504U8/F2YGG7/P00533	8	Human Diseases; Cancer: specific types
hsa05221	hsa05221	Acute myeloid leukemia	7/281	96/11016	0.0112774063360494	0.036463613819893	0.0214996167576146	A4QPA9/Q02750/P31751/Q9Y243/P19838/P10721/P36888	7	Human Diseases; Cancer: specific types
hsa04927	hsa04927	Cortisol synthesis and secretion	7/281	98/11016	0.0125429456515514	0.0401098591714447	0.0236495100196979	Q13936/Q59GU3/Q5V9X9/A0A0S2Z3H8/O95467/P63092/Q9NQ66	7	Organismal Systems; Endocrine system
hsa04066	hsa04066	HIF-1 signaling pathway	10/281	176/11016	0.0147611870274371	0.0466902763585239	0.0275294449138701	A4QPA9/Q02750/P36941/P06730/P31751/Q9Y243/P19838/Q504U8/F2YGG7/P00533	10	Environmental Information Processing; Signal transduction
hsa05162	hsa05162	Measles	11/281	203/11016	0.0150062122125939	0.046954922084568	0.0276854848970323	A8ASI8/B3KT21/P55957/P15529/Q07812/P31751/Q9NYJ8/Q9Y243/P19838/P48023/Q53ZZ1	11	Human Diseases; Infectious disease: viral
hsa04371	hsa04371	Apelin signaling pathway	11/281	204/11016	0.0155147059509009	0.0480295684224698	0.0283191161253846	A0A024R1X5/Q14457/D2JYH4/P62736/A4QPA9/Q02750/Q15796/Q53XR6/P31751/Q9Y243/Q9NQ66	11	Environmental Information Processing; Signal transduction
hsa05330	hsa05330	Allograft rejection	7/281	103/11016	0.016149715537312	0.0494691286458714	0.0291679072862255	A0A0S2Z3C7/P25942/Q6P2H9/D4HNR6/P05112/P48023/Q53ZZ1	7	Human Diseases; Immune disease

## Sheet: Reactome (44.5-year peak)
	ID	Description	GeneRatio	BgRatio	pvalue	p.adjust	qvalue	geneID	Count	disease
R-HSA-9614399	R-HSA-9614399	Regulation of localization of FOXO transcription factors	5/249	11/10899	2.46898761356233e-06	0.00232578633197572	0.00220909418055577	10971/208/2309/2308/10000	5	FALSE
R-HSA-111447	R-HSA-111447	Activation of BAD and translocation to mitochondria	5/249	15/10899	1.48874069311383e-05	0.00701196866456613	0.00666015573235134	637/5534/10971/208/10000	5	FALSE
R-HSA-6798695	R-HSA-6798695	Neutrophil degranulation	26/249	482/10899	4.0899583912079e-05	0.0128424693483928	0.0121981215176376	1471/23071/28988/10577/5269/2720/1509/5329/1476/967/4048/3903/10159/945/10970/1075/10890/8773/8673/1992/9535/9342/4790/683/6402/57126	26	FALSE
R-HSA-15869	R-HSA-15869	Metabolism of nucleotides	10/249	99/10899	8.46212381628991e-05	0.0176327830047154	0.0167480897910472	79077/11164/1841/30833/84618/51251/3704/1635/51292/204	10	FALSE
R-HSA-5357801	R-HSA-5357801	Programmed Cell Death	15/249	210/10899	9.35922664793813e-05	0.0176327830047154	0.0167480897910472	637/28988/5534/8428/4001/581/8795/10971/11140/208/10000/8473/1630/356/4137	15	FALSE
R-HSA-109581	R-HSA-109581	Apoptosis	13/249	180/10899	0.000245828714181971	0.0385951081265695	0.036658667904329	637/28988/5534/8428/4001/581/8795/10971/208/10000/1630/356/4137	13	FALSE
R-HSA-8866910	R-HSA-8866910	TFAP2 (AP-2) family regulates transcription of growth factors and their receptors	4/249	15/10899	0.000297638228092401	0.0400536015518631	0.0380439840418859	3815/1956/7528/7020	4	FALSE
R-HSA-5663202	R-HSA-5663202	Diseases of signal transduction by growth factor receptors and second messengers	22/249	433/10899	0.000377979391924517	0.0426907742178175	0.0405488413064531	5435/7048/5037/4627/5604/5501/7040/11140/22872/9208/8546/4087/208/2309/2308/10000/3815/2322/1956/9734/4254/5903	22	TRUE
R-HSA-5669034	R-HSA-5669034	TNFs bind their physiological receptors	5/249	29/10899	0.000453192932248593	0.0426907742178175	0.0405488413064531	8764/60401/7132/356/4049	5	FALSE
R-HSA-8863795	R-HSA-8863795	Downregulation of ERBB2 signaling	5/249	29/10899	0.000453192932248593	0.0426907742178175	0.0405488413064531	11140/9101/208/10000/1956	5	FALSE
R-HSA-114452	R-HSA-114452	Activation of BH3-only proteins	5/249	30/10899	0.000533800874719731	0.0457127658169079	0.0434192099054327	637/5534/10971/208/10000	5	FALSE
R-HSA-74259	R-HSA-74259	Purine catabolism	4/249	18/10899	0.0006321605127569	0.0487019141486764	0.0462583830890322	11164/30833/84618/3704	4	FALSE
R-HSA-9614085	R-HSA-9614085	FOXO-mediated transcription	7/249	65/10899	0.000672107095470056	0.0487019141486764	0.0462583830890322	10971/4087/208/2309/2308/10000/356	7	FALSE

## Sheet: GO (57.5-year peak)
	ONTOLOGY	ID	Description	GeneRatio	BgRatio	pvalue	p.adjust	qvalue	geneID	Count
GO:0031225	CC	GO:0031225	anchored component of membrane	12/212	169/19869	2.7933612372413e-07	9.1474929972249e-05	8.03695525089514e-05	8000/5067/7035/4684/338328/2262/63827/7512/133121/53942/419/683	12
GO:0031983	CC	GO:0031983	vesicle lumen	16/212	327/19869	4.87866293185328e-07	9.1474929972249e-05	8.03695525089514e-05	1118/5806/1621/7276/5627/2934/1893/51738/1956/6993/28988/10450/55276/29099/56954/8635	16
GO:0034774	CC	GO:0034774	secretory granule lumen	15/212	322/19869	2.06485207299596e-06	0.000216986264179175	0.00019064337035251	1118/5806/1621/7276/5627/2934/1893/51738/6993/28988/10450/55276/29099/56954/8635	15
GO:0060205	CC	GO:0060205	cytoplasmic vesicle lumen	15/212	325/19869	2.31452015124453e-06	0.000216986264179175	0.00019064337035251	1118/5806/1621/7276/5627/2934/1893/51738/6993/28988/10450/55276/29099/56954/8635	15
GO:0044000	BP	GO:0044000	movement in host	12/211	183/18903	1.04816932345782e-06	0.00131472759253755	0.00105846280376367	3685/1803/4684/5806/2934/1956/4340/6993/5034/8764/9525/5819	12
GO:0046718	BP	GO:0046718	viral entry into host cell	11/211	151/18903	1.05953236059397e-06	0.00131472759253755	0.00105846280376367	3685/1803/4684/5806/2934/1956/4340/6993/5034/8764/5819	11
GO:0044409	BP	GO:0044409	entry into host	11/211	158/18903	1.65733564279043e-06	0.00131472759253755	0.00105846280376367	3685/1803/4684/5806/2934/1956/4340/6993/5034/8764/5819	11
GO:0062197	BP	GO:0062197	cellular response to chemical stress	16/211	345/18903	1.76538261125921e-06	0.00131472759253755	0.00105846280376367	10725/4314/1956/4233/84557/10935/5269/5034/6810/8428/8678/9131/2395/87178/142/11315	16
GO:0006979	BP	GO:0006979	response to oxidative stress	18/211	434/18903	1.93969842510703e-06	0.00131472759253755	0.00105846280376367	1277/4314/1956/7356/4233/84557/10935/5034/6810/8428/8678/9131/11168/2395/87178/475/142/11315	18
GO:0019838	MF	GO:0019838	growth factor binding	10/211	132/18432	2.89367367887628e-06	0.00132819621860421	0.00113614766549563	3685/4916/7850/3486/3485/1277/9982/1956/2065/3491	10
GO:0045296	MF	GO:0045296	cadherin binding	15/211	333/18432	7.19396503122965e-06	0.00165101497466721	0.00141228892455193	5787/1956/5770/9101/8615/28988/3190/8428/53827/9208/55379/10726/11273/11315/10226	15
GO:0051701	BP	GO:0051701	biological process involved in interaction with host	12/211	203/18903	3.10772150588551e-06	0.00174407086156189	0.00140411910769157	3685/1803/4684/5806/2934/1956/4340/6993/5034/8764/9525/5819	12
GO:0042177	BP	GO:0042177	negative regulation of protein catabolic process	9/211	111/18903	4.28488957333971e-06	0.00174407086156189	0.00140411910769157	8473/23077/4745/1956/51374/7917/819/11315/80279	9
GO:0034599	BP	GO:0034599	cellular response to oxidative stress	14/211	288/18903	4.64336746538862e-06	0.00174407086156189	0.00140411910769157	4314/1956/4233/84557/10935/5034/6810/8428/8678/9131/2395/87178/142/11315	14
GO:2001233	BP	GO:2001233	regulation of apoptotic signaling pathway	16/211	374/18903	4.97069079242436e-06	0.00174407086156189	0.00140411910769157	3685/1621/3565/3958/8742/7857/581/5770/5034/6810/3190/8678/637/2395/142/11315	16
GO:0009895	BP	GO:0009895	negative regulation of catabolic process	15/211	332/18903	5.14626987772761e-06	0.00174407086156189	0.00140411910769157	8473/23077/4745/3953/1956/4233/51374/1676/8678/7917/819/11315/80279/23118/1981	15
GO:0005788	CC	GO:0005788	endoplasmic reticulum lumen	13/212	312/19869	3.24918309692284e-05	0.00243688732269213	0.00214104065123547	5624/3486/1114/8404/1277/51738/7857/1622/5034/56005/51246/8635/3491	13
GO:0097191	BP	GO:0097191	extrinsic apoptotic signaling pathway	12/211	224/18903	8.51955377954171e-06	0.0026247970689879	0.00211317544464805	3685/1621/3565/3958/8742/7857/2065/581/6810/637/7132/11315	12
GO:0051205	BP	GO:0051205	protein insertion into membrane	7/211	67/18903	9.63602110615427e-06	0.00272137296072974	0.00219092690413613	1956/581/26519/7917/9141/4836/819	7
GO:0030546	MF	GO:0030546	signaling receptor activator activity	18/211	498/18432	1.80208241548489e-05	0.00275718609569188	0.00235851488061707	9135/1803/7784/1114/3565/2658/7276/9965/11009/3958/3562/51738/8742/7857/1956/6356/2488/10850	18
GO:0001618	MF	GO:0001618	virus receptor activity	7/211	77/18432	2.84502569826573e-05	0.00284166077426106	0.00243077506891268	3685/1803/4684/1956/4340/8764/5819	7
GO:0140272	MF	GO:0140272	exogenous protein binding	7/211	78/18432	3.09549103950006e-05	0.00284166077426106	0.00243077506891268	3685/1803/4684/1956/4340/8764/5819	7
GO:0042176	BP	GO:0042176	regulation of protein catabolic process	15/211	361/18903	1.396901804919e-05	0.00351453179696565	0.00282948437444207	8473/23077/4745/4287/8742/1956/9101/51374/7917/9146/51160/819/11315/80279/5720	15
GO:0019058	BP	GO:0019058	viral life cycle	14/211	319/18903	1.4811477628402e-05	0.00351453179696565	0.00282948437444207	3685/1803/4684/5806/2934/1956/4340/6993/5034/8764/10450/9525/5819/51160	14
GO:0042542	BP	GO:0042542	response to hydrogen peroxide	9/211	130/18903	1.55556143270831e-05	0.00351453179696565	0.00282948437444207	1277/4233/84557/10935/8428/8678/9131/2395/11315	9
GO:0000302	BP	GO:0000302	response to reactive oxygen species	11/211	204/18903	1.91320533387806e-05	0.00405240804782047	0.00326251856934996	1277/1956/7356/4233/84557/10935/8428/8678/9131/2395/11315	11
GO:0048018	MF	GO:0048018	receptor ligand activity	17/211	491/18432	5.29893323236339e-05	0.00405368392275799	0.00346754753626587	9135/1803/7784/1114/3565/2658/7276/9965/11009/3958/3562/51738/8742/7857/6356/2488/10850	17
GO:0070820	CC	GO:0070820	tertiary granule	9/212	164/19869	6.86837094104988e-05	0.00429273183815617	0.00377157913078704	1118/5806/5787/3958/634/5269/28988/427/56954	9
GO:0044389	MF	GO:0044389	ubiquitin-like protein ligase binding	13/211	318/18432	8.00932445798351e-05	0.00525182846602061	0.00449244815462834	4287/1956/2065/84557/10067/8764/8678/7917/637/9146/819/80279/10010	13
GO:0022411	BP	GO:0022411	cellular component disassembly	17/211	483/18903	3.1648499888221e-05	0.00577799630730898	0.00465175767686319	8473/1803/2934/4314/84557/581/3396/1676/11140/8678/9131/9525/11315/80279/10226/136319/6457	17
GO:0097193	BP	GO:0097193	intrinsic apoptotic signaling pathway	13/211	298/18903	3.19737603685744e-05	0.00577799630730898	0.00465175767686319	581/5770/5034/3190/8428/8678/7917/9131/637/51246/7132/142/11315	13
GO:0048015	BP	GO:0048015	phosphatidylinositol-mediated signaling	10/211	178/18903	3.23936057358721e-05	0.00577799630730898	0.00465175767686319	4916/8473/2066/634/1956/4653/2065/8678/56005/708	10
GO:0014066	BP	GO:0014066	regulation of phosphatidylinositol 3-kinase signaling	8/211	111/18903	3.4819075817395e-05	0.00585303327579341	0.00471216854866565	4916/2066/634/1956/4653/2065/8678/56005	8
GO:0014065	BP	GO:0014065	phosphatidylinositol 3-kinase signaling	9/211	145/18903	3.70851705539153e-05	0.00585303327579341	0.00471216854866565	4916/2066/634/1956/4653/2065/8678/56005/708	9
GO:0048017	BP	GO:0048017	inositol lipid-mediated signaling	10/211	182/18903	3.91489679487389e-05	0.00585303327579341	0.00471216854866565	4916/8473/2066/634/1956/4653/2065/8678/56005/708	10
GO:0038128	BP	GO:0038128	ERBB2 signaling pathway	4/211	18/18903	4.08367385051054e-05	0.00585303327579341	0.00471216854866565	2066/1956/4653/2065	4
GO:0007416	BP	GO:0007416	synapse assembly	10/211	184/18903	4.29554447149009e-05	0.00585303327579341	0.00471216854866565	4916/92737/3556/23077/4884/2066/53942/51738/28988/1981	10
GO:0044403	BP	GO:0044403	biological process involved in symbiotic interaction	13/211	307/18903	4.34626947984073e-05	0.00585303327579341	0.00471216854866565	3685/1803/4684/5806/2934/1956/4340/6993/5034/8764/9525/5819/2597	13
GO:0001938	BP	GO:0001938	positive regulation of endothelial cell proliferation	8/211	115/18903	4.49037666481642e-05	0.00585303327579341	0.00471216854866565	2658/1893/9982/51738/8742/7857/6356/56005	8
GO:0048245	BP	GO:0048245	eosinophil chemotaxis	4/211	19/18903	5.12753786399608e-05	0.00643600956336397	0.00518151194677499	3565/3958/7857/6356	4
GO:0050920	BP	GO:0050920	regulation of chemotaxis	11/211	230/18903	5.74275019499413e-05	0.00659809687328689	0.00531200543416304	4916/1803/23077/3565/7857/4233/6810/708/683/10850/177	11
GO:0052547	BP	GO:0052547	regulation of peptidase activity	16/211	459/18903	6.08913246440923e-05	0.00659809687328689	0.00531200543416304	7035/5627/2934/1893/10935/581/5269/9131/9141/637/11315/2597/3491/177/10010/5720	16
GO:0031334	BP	GO:0031334	positive regulation of protein-containing complex assembly	10/211	192/18903	6.15092273004475e-05	0.00659809687328689	0.00531200543416304	4868/3958/4314/6356/4233/581/55845/637/11315/1981	10
GO:0002709	BP	GO:0002709	regulation of T cell mediated immunity	7/211	89/18903	6.20643557767349e-05	0.00659809687328689	0.00531200543416304	7784/3565/3575/634/911/5819/177	7
GO:2001236	BP	GO:2001236	regulation of extrinsic apoptotic signaling pathway	9/211	155/18903	6.24431139022042e-05	0.00659809687328689	0.00531200543416304	3685/1621/3565/3958/8742/7857/6810/637/11315	9
GO:0050731	BP	GO:0050731	positive regulation of peptidyl-tyrosine phosphorylation	10/211	193/18903	6.42482138738469e-05	0.00659809687328689	0.00531200543416304	3565/11009/2066/3562/51738/1956/2065/5770/8764/7132	10
GO:0016032	BP	GO:0016032	viral process	15/211	421/18903	8.13664612997989e-05	0.00803286652484636	0.00646711187352324	3685/1803/4684/5806/6482/2934/1956/4340/6993/5034/8764/10450/9525/5819/51160	15
GO:0001935	BP	GO:0001935	endothelial cell proliferation	10/211	199/18903	8.29596719886759e-05	0.00803286652484636	0.00646711187352324	1621/2658/1893/9982/51738/8742/7857/947/6356/56005	10
GO:0001914	BP	GO:0001914	regulation of T cell mediated cytotoxicity	5/211	41/18903	8.93013013107265e-05	0.00840672528172367	0.00676809862565506	3575/634/911/5819/177	5
GO:0101002	CC	GO:0101002	ficolin-1-rich granule	9/212	185/19869	0.000172013960319415	0.00921503358854007	0.00809629617744012	2934/3958/5269/6993/28988/10450/55276/427/29099	9
GO:0050673	BP	GO:0050673	epithelial cell proliferation	16/211	481/18903	0.000105119491334095	0.00962837719273642	0.00775162792426668	3486/1621/2658/1893/634/9982/51738/8742/7857/947/1956/6356/581/2488/56005/637	16
GO:0072677	BP	GO:0072677	eosinophil migration	4/211	23/18903	0.000113111956589946	0.0100878005495612	0.00812150114906203	3565/3958/7857/6356	4
GO:0062023	CC	GO:0062023	collagen-containing extracellular matrix	14/212	433/19869	0.000241759088280131	0.0103885972154368	0.00912738506226447	4684/7784/4485/2262/8404/63827/8722/1277/3958/1893/7148/4653/5269/3491	14
GO:0005758	CC	GO:0005758	mitochondrial intermembrane space	6/212	84/19869	0.000279661031723789	0.0103885972154368	0.00912738506226447	4653/26519/9131/87178/11315/8635	6
GO:1904724	CC	GO:1904724	tertiary granule lumen	5/212	55/19869	0.000297452772702612	0.0103885972154368	0.00912738506226447	1118/5806/28988/427/56954	5
GO:0042581	CC	GO:0042581	specific granule	8/212	160/19869	0.00032830521632162	0.0103885972154368	0.00912738506226447	3685/1118/5806/5787/634/6810/56954/683	8
GO:0030139	CC	GO:0030139	endocytic vesicle	12/212	343/19869	0.000332435110893978	0.0103885972154368	0.00912738506226447	9693/3685/9135/1803/3575/2934/1956/1211/6810/8678/9146/4074	12
GO:1904813	CC	GO:1904813	ficolin-1-rich granule lumen	7/212	124/19869	0.000373896727692508	0.0107854825295916	0.00947608710670081	2934/6993/28988/10450/55276/427/29099	7
GO:0051881	BP	GO:0051881	regulation of mitochondrial membrane potential	6/211	70/18903	0.000130316218772897	0.0113241452672141	0.00911685935382859	4653/10935/581/637/142/11315	6
GO:0007259	BP	GO:0007259	receptor signaling pathway via JAK-STAT	9/211	172/18903	0.000138645653826115	0.0114602468491879	0.00922643221353762	4485/3565/3575/11009/2066/3562/9111/9146/7132	9
GO:1905475	BP	GO:1905475	regulation of protein localization to membrane	9/211	172/18903	0.000138645653826115	0.0114602468491879	0.00922643221353762	2262/2934/3958/1956/6810/23184/9141/4836/5525	9
GO:0002020	MF	GO:0002020	protease binding	8/211	139/18432	0.000201682921332836	0.0115715576114715	0.00989838548120366	3685/1803/10752/1277/1893/5269/7917/11315	8
GO:0006898	BP	GO:0006898	receptor-mediated endocytosis	11/211	257/18903	0.000153869287173967	0.0117878100292128	0.00949014725527464	3685/9779/1803/3565/634/1211/28988/3190/9146/4074/6457	11
GO:0043653	BP	GO:0043653	mitochondrial fragmentation involved in apoptotic process	3/211	10/18903	0.000155291741753353	0.0117878100292128	0.00949014725527464	4884/2066/581	3
GO:0099151	BP	GO:0099151	regulation of postsynaptic density assembly	3/211	10/18903	0.000155291741753353	0.0117878100292128	0.00949014725527464	4916/3556/4884	3
GO:0044089	BP	GO:0044089	positive regulation of cellular component biogenesis	16/211	498/18903	0.000156521525911648	0.0117878100292128	0.00949014725527464	3556/4868/3958/51738/4314/6356/4653/4233/581/55845/8678/9525/637/9146/11315/1981	16
GO:0050900	BP	GO:0050900	leukocyte migration	14/211	398/18903	0.000160767686478668	0.0118443845538306	0.00953569435589719	1803/7784/1621/3565/3958/1893/7857/947/6356/8764/708/683/10850/177	14
GO:0071677	BP	GO:0071677	positive regulation of mononuclear cell migration	6/211	73/18903	0.000164564943538573	0.0118661828436644	0.00955324375480363	3565/3958/8764/708/10850/177	6
GO:0050730	BP	GO:0050730	regulation of peptidyl-tyrosine phosphorylation	11/211	266/18903	0.000207506101032509	0.0133677172394445	0.010762101251616	3565/11009/2066/3562/51738/1956/2065/5770/8764/7132/683	11
GO:0008637	BP	GO:0008637	apoptotic mitochondrial changes	7/211	108/18903	0.000210123307445264	0.0133677172394445	0.010762101251616	4884/2066/581/9141/637/4836/2395	7
GO:1902510	BP	GO:1902510	regulation of apoptotic DNA fragmentation	3/211	11/18903	0.000211770073306407	0.0133677172394445	0.010762101251616	581/1676/9131	3
GO:0016540	BP	GO:0016540	protein autoprocessing	4/211	27/18903	0.000216477468091612	0.0133677172394445	0.010762101251616	5653/1510/2395/142	4
GO:0030262	BP	GO:0030262	apoptotic nuclear changes	4/211	27/18903	0.000216477468091612	0.0133677172394445	0.010762101251616	581/1676/9131/80279	4
GO:0050921	BP	GO:0050921	positive regulation of chemotaxis	8/211	144/18903	0.000216863639819099	0.0133677172394445	0.010762101251616	4916/3565/7857/4233/6810/708/10850/177	8
GO:0043254	BP	GO:0043254	regulation of protein-containing complex assembly	14/211	410/18903	0.00021825163009699	0.0133677172394445	0.010762101251616	4868/2934/3958/4314/6356/4233/581/55845/28988/637/142/11315/1981/136319	14
GO:0001936	BP	GO:0001936	regulation of endothelial cell proliferation	9/211	183/18903	0.000220888806553229	0.0133677172394445	0.010762101251616	1621/2658/1893/9982/51738/8742/7857/6356/56005	9
GO:0097696	BP	GO:0097696	receptor signaling pathway via STAT	9/211	183/18903	0.000220888806553229	0.0133677172394445	0.010762101251616	4485/3565/3575/11009/2066/3562/9111/9146/7132	9
GO:0031970	CC	GO:0031970	organelle envelope lumen	6/212	94/19869	0.00051293149953378	0.0137392365946548	0.012071245064216	4653/26519/9131/87178/11315/8635	6
GO:0030195	BP	GO:0030195	negative regulation of blood coagulation	5/211	50/18903	0.000232747531112917	0.0137418869109084	0.0110633383153157	5624/7035/5627/634/947	5
GO:0032103	BP	GO:0032103	positive regulation of response to external stimulus	15/211	464/18903	0.000235381196401712	0.0137418869109084	0.0110633383153157	4916/7784/3565/51738/7857/4233/6810/8428/708/9111/5819/7132/11315/10850/177	15
GO:0016236	BP	GO:0016236	macroautophagy	12/211	317/18903	0.000243441053498334	0.0137418869109084	0.0110633383153157	9779/8473/3565/84557/11140/8678/9550/3964/9525/9146/51160/2597	12
GO:0001913	BP	GO:0001913	T cell mediated cytotoxicity	5/211	51/18903	0.000255726252965811	0.0137418869109084	0.0110633383153157	3575/634/911/5819/177	5
GO:1900047	BP	GO:1900047	negative regulation of hemostasis	5/211	51/18903	0.000255726252965811	0.0137418869109084	0.0110633383153157	5624/7035/5627/634/947	5
GO:0045766	BP	GO:0045766	positive regulation of angiogenesis	9/211	187/18903	0.000259401760329058	0.0137418869109084	0.0110633383153157	2658/1893/51738/8742/947/6356/23576/56005/92140	9
GO:1904018	BP	GO:1904018	positive regulation of vasculature development	9/211	187/18903	0.000259401760329058	0.0137418869109084	0.0110633383153157	2658/1893/51738/8742/947/6356/23576/56005/92140	9
GO:0014068	BP	GO:0014068	positive regulation of phosphatidylinositol 3-kinase signaling	6/211	80/18903	0.000272314204101442	0.0137418869109084	0.0110633383153157	4916/2066/4653/2065/8678/56005	6
GO:0002456	BP	GO:0002456	T cell mediated immunity	7/211	113/18903	0.000277710373583552	0.0137418869109084	0.0110633383153157	7784/3565/3575/634/911/5819/177	7
GO:0045860	BP	GO:0045860	positive regulation of protein kinase activity	14/211	420/18903	0.000278918438550741	0.0137418869109084	0.0110633383153157	9693/4916/3565/2066/51738/4331/1956/2065/5770/3654/11315/23118/3491/177	14
GO:0002685	BP	GO:0002685	regulation of leukocyte migration	10/211	231/18903	0.000279727500143978	0.0137418869109084	0.0110633383153157	1803/7784/3565/3958/1893/8764/708/683/10850/177	10
GO:0099150	BP	GO:0099150	regulation of postsynaptic specialization assembly	3/211	12/18903	0.000280039138484554	0.0137418869109084	0.0110633383153157	4916/3556/4884	3
GO:2001214	BP	GO:2001214	positive regulation of vasculogenesis	3/211	12/18903	0.000280039138484554	0.0137418869109084	0.0110633383153157	9693/634/947	3
GO:0034614	BP	GO:0034614	cellular response to reactive oxygen species	8/211	150/18903	0.000286298541517301	0.0137418869109084	0.0110633383153157	1956/4233/84557/10935/8678/9131/2395/11315	8
GO:0006921	BP	GO:0006921	cellular component disassembly involved in execution phase of apoptosis	4/211	29/18903	0.000287894355466066	0.0137418869109084	0.0110633383153157	581/1676/9131/80279	4
GO:0031667	BP	GO:0031667	response to nutrient levels	15/211	474/18903	0.000295378192217493	0.0139032874086817	0.0111932788629787	9779/8473/3485/1277/51738/84557/581/4149/8428/191/8678/9131/4925/10226/1981	15
GO:0052372	BP	GO:0052372	modulation by symbiont of entry into host	5/211	53/18903	0.000306813241131086	0.0140512172188277	0.0113123744098403	3685/5806/2934/5034/5819	5
GO:0097300	BP	GO:0097300	programmed necrotic cell death	5/211	53/18903	0.000306813241131086	0.0140512172188277	0.0113123744098403	8473/581/9131/427/142	5
GO:0050819	BP	GO:0050819	negative regulation of coagulation	5/211	54/18903	0.000335083127641245	0.0149141995946636	0.0120071455170343	5624/7035/5627/634/947	5
GO:0052548	BP	GO:0052548	regulation of endopeptidase activity	14/211	428/18903	0.000337389118475471	0.0149141995946636	0.0120071455170343	7035/5627/2934/10935/581/5269/9131/9141/637/11315/2597/3491/177/5720	14
GO:0010952	BP	GO:0010952	positive regulation of peptidase activity	9/211	194/18903	0.000340161999942425	0.0149141995946636	0.0120071455170343	2934/581/9131/9141/637/3491/177/10010/5720	9
GO:0051495	BP	GO:0051495	positive regulation of cytoskeleton organization	9/211	195/18903	0.000353232484711638	0.0149141995946636	0.0120071455170343	4916/4868/2934/6356/4653/4233/55845/9525/10850	9
GO:0018108	BP	GO:0018108	peptidyl-tyrosine phosphorylation	13/211	380/18903	0.000359449946344312	0.0149141995946636	0.0120071455170343	4916/3565/11009/2066/3562/51738/1956/2065/4233/5770/8764/7132/683	13
GO:1903624	BP	GO:1903624	regulation of DNA catabolic process	3/211	13/18903	0.000361060002052812	0.0149141995946636	0.0120071455170343	581/1676/9131	3
GO:1904889	BP	GO:1904889	regulation of excitatory synapse assembly	3/211	13/18903	0.000361060002052812	0.0149141995946636	0.0120071455170343	4916/3556/4884	3
GO:1905874	BP	GO:1905874	regulation of postsynaptic density organization	3/211	13/18903	0.000361060002052812	0.0149141995946636	0.0120071455170343	4916/3556/4884	3
GO:0045785	BP	GO:0045785	positive regulation of cell adhesion	15/211	484/18903	0.000368133272757621	0.0149141995946636	0.0120071455170343	10725/3685/1803/7784/3565/3485/3575/4653/3654/5034/8764/6810/708/3491/177	15
GO:0033688	BP	GO:0033688	regulation of osteoblast proliferation	4/211	31/18903	0.00037480029863467	0.0149141995946636	0.0120071455170343	3685/4745/51374/3491	4
GO:0018212	BP	GO:0018212	peptidyl-tyrosine modification	13/211	382/18903	0.000377840150231694	0.0149141995946636	0.0120071455170343	4916/3565/11009/2066/3562/51738/1956/2065/4233/5770/8764/7132/683	13
GO:0008625	BP	GO:0008625	extrinsic apoptotic signaling pathway via death domain receptors	6/211	85/18903	0.000378465967878745	0.0149141995946636	0.0120071455170343	3958/581/6810/637/7132/11315	6
GO:0016530	MF	GO:0016530	metallochaperone activity	3/211	12/18432	0.000301486131298019	0.015375792696199	0.013152552862475	2395/475/11315	3
GO:0051897	BP	GO:0051897	positive regulation of protein kinase B signaling	7/211	120/18903	0.000400617377873704	0.0156056585472872	0.0125638262970192	1956/4653/4233/56005/708/92140/11315	7
GO:0030296	MF	GO:0030296	protein tyrosine kinase activator activity	4/211	30/18432	0.000362157740968037	0.0162164759479095	0.0138716787720909	2066/51738/1956/2065	4
GO:0031994	MF	GO:0031994	insulin-like growth factor I binding	3/211	13/18432	0.000388630142542494	0.0162164759479095	0.0138716787720909	3685/3486/3485	3
GO:0070231	BP	GO:0070231	T cell apoptotic process	5/211	57/18903	0.000431800141740676	0.0166292122768085	0.0133878704233473	3575/6482/3958/581/1676	5
GO:0050840	MF	GO:0050840	extracellular matrix binding	5/211	56/18432	0.000445651667123129	0.0170461762674597	0.0145814098102568	3685/8404/3958/1893/3491	5
GO:0071675	BP	GO:0071675	regulation of mononuclear cell migration	7/211	123/18903	0.00046507754717613	0.0174551133820006	0.0140527880872003	3565/3958/1893/8764/708/10850/177	7
GO:0031330	BP	GO:0031330	negative regulation of cellular catabolic process	10/211	247/18903	0.00047473602108641	0.0174551133820006	0.0140527880872003	8473/3953/4233/1676/8678/7917/819/11315/23118/1981	10
GO:0019221	BP	GO:0019221	cytokine-mediated signaling pathway	15/211	496/18903	0.00047533318034967	0.0174551133820006	0.0140527880872003	7850/3556/3575/1893/634/3953/6356/5770/3654/5034/8764/11140/9111/7132/10010	15
GO:0033674	BP	GO:0033674	positive regulation of kinase activity	15/211	496/18903	0.00047533318034967	0.0174551133820006	0.0140527880872003	9693/4916/3565/2066/51738/4331/1956/2065/4233/5770/3654/11315/23118/3491/177	15
GO:0051204	BP	GO:0051204	protein insertion into mitochondrial membrane	4/211	33/18903	0.000478998390240796	0.0174551133820006	0.0140527880872003	581/26519/9141/4836	4
GO:0043903	BP	GO:0043903	regulation of biological process involved in symbiotic interaction	5/211	59/18903	0.000507064822099698	0.0180888703378513	0.014563014059639	3685/5806/2934/5034/5819	5
GO:0061098	BP	GO:0061098	positive regulation of protein tyrosine kinase activity	5/211	59/18903	0.000507064822099698	0.0180888703378513	0.014563014059639	2066/51738/1956/2065/5770	5
GO:0098978	CC	GO:0098978	glutamatergic synapse	11/212	324/19869	0.000750798034481574	0.0187699508620393	0.0164912129679111	4916/3556/4884/8404/63827/2066/51738/9101/6810/708/6457	11
GO:0044214	CC	GO:0044214	spanning component of plasma membrane	3/212	18/19869	0.000868239770962995	0.0203493696319452	0.0178788847573301	2066/1956/2065	3
GO:0062098	BP	GO:0062098	regulation of programmed necrotic cell death	4/211	35/18903	0.000602323243713434	0.0210440564221116	0.0169421795735781	8473/9131/427/142	4
GO:1905898	BP	GO:1905898	positive regulation of response to endoplasmic reticulum stress	4/211	35/18903	0.000602323243713434	0.0210440564221116	0.0169421795735781	4287/581/5770/7917	4
GO:0070301	BP	GO:0070301	cellular response to hydrogen peroxide	6/211	93/18903	0.000612741646471542	0.0211896065295108	0.0170593592658887	4233/84557/8678/9131/2395/11315	6
GO:0042098	BP	GO:0042098	T cell proliferation	9/211	212/18903	0.000647063085014425	0.0219567076572901	0.0176769381583439	7784/3565/3485/3958/7356/581/8764/637/177	9
GO:0071621	BP	GO:0071621	granulocyte chemotaxis	7/211	130/18903	0.000647881606883746	0.0219567076572901	0.0176769381583439	1803/3565/3958/7857/6356/708/683	7
GO:0046651	BP	GO:0046651	lymphocyte proliferation	11/211	305/18903	0.000658990356805141	0.0221120625664616	0.0178020115147361	7784/3565/3485/3575/3958/7356/581/8764/637/683/177	11
GO:0033687	BP	GO:0033687	osteoblast proliferation	4/211	36/18903	0.000671738014190505	0.0223188248048198	0.0179684719585324	3685/4745/51374/3491	4
GO:0070059	BP	GO:0070059	intrinsic apoptotic signaling pathway in response to endoplasmic reticulum stress	5/211	63/18903	0.000686713654969103	0.0224751626970531	0.0180943366963587	581/5770/7917/9131/11315	5
GO:2001212	BP	GO:2001212	regulation of vasculogenesis	3/211	16/18903	0.000689706969753178	0.0224751626970531	0.0180943366963587	9693/634/947	3
GO:2001242	BP	GO:2001242	regulation of intrinsic apoptotic signaling pathway	8/211	172/18903	0.000712217349521923	0.0229876628336171	0.0185069410522388	581/5770/5034/3190/8678/637/142/11315	8
GO:0050918	BP	GO:0050918	positive chemotaxis	5/211	64/18903	0.000738234311246766	0.0232141026740822	0.0186892435685798	4916/3958/7857/4233/177	5
GO:0032435	BP	GO:0032435	negative regulation of proteasomal ubiquitin-dependent protein catabolic process	4/211	37/18903	0.000746632396422236	0.0232141026740822	0.0186892435685798	8473/7917/819/11315	4
GO:0045324	BP	GO:0045324	late endosome to vacuole transport	4/211	37/18903	0.000746632396422236	0.0232141026740822	0.0186892435685798	8678/9525/9146/51160	4
GO:0090151	BP	GO:0090151	establishment of protein localization to mitochondrial membrane	4/211	37/18903	0.000746632396422236	0.0232141026740822	0.0186892435685798	581/26519/9141/4836	4
GO:0010950	BP	GO:0010950	positive regulation of endopeptidase activity	8/211	174/18903	0.000768082913449233	0.0236639363061768	0.0190513962838317	2934/581/9131/9141/637/3491/177/5720	8
GO:0032943	BP	GO:0032943	mononuclear cell proliferation	11/211	312/18903	0.000793903486975783	0.0242279762651568	0.0195054943949578	7784/3565/3485/3575/3958/7356/581/8764/637/683/177	11
GO:0050678	BP	GO:0050678	regulation of epithelial cell proliferation	13/211	414/18903	0.00080068850448438	0.0242279762651568	0.0195054943949578	1621/2658/1893/634/9982/51738/8742/7857/1956/6356/581/56005/637	13
GO:0031625	MF	GO:0031625	ubiquitin protein ligase binding	11/211	299/18432	0.000687171451968047	0.024262438188718	0.0207542470918285	4287/1956/2065/84557/10067/8764/8678/7917/637/819/10010	11
GO:0097107	BP	GO:0097107	postsynaptic density assembly	3/211	17/18903	0.00083063529197765	0.0246931842501075	0.0198800247165842	4916/3556/4884	3
GO:2001267	BP	GO:2001267	regulation of cysteine-type endopeptidase activity involved in apoptotic signaling pathway	3/211	17/18903	0.00083063529197765	0.0246931842501075	0.0198800247165842	2934/581/11315	3
GO:0032956	BP	GO:0032956	regulation of actin cytoskeleton organization	12/211	365/18903	0.000853881669550272	0.0251635215487467	0.0202586845535405	4916/4868/2934/6356/4653/4233/55845/28988/51019/683/10850/136319	12
GO:0036473	BP	GO:0036473	cell death in response to oxidative stress	6/211	100/18903	0.000898477628690473	0.0261409168397067	0.0210455673769687	4314/4233/5034/8428/142/11315	6
GO:0042531	BP	GO:0042531	positive regulation of tyrosine phosphorylation of STAT protein	5/211	67/18903	0.000910188311326464	0.0261409168397067	0.0210455673769687	3565/11009/2066/3562/7132	5
GO:1901224	BP	GO:1901224	positive regulation of NIK/NF-kappaB signaling	5/211	67/18903	0.000910188311326464	0.0261409168397067	0.0210455673769687	10725/1956/3654/9111/177	5
GO:0006457	BP	GO:0006457	protein folding	9/211	223/18903	0.000926579444449016	0.0263880482120816	0.0212445282619359	10294/5034/1676/11140/10450/23184/9141/10726/22948	9
GO:1905477	BP	GO:1905477	positive regulation of protein localization to membrane	6/211	101/18903	0.000946481842763435	0.026723221479632	0.0215143700440143	3958/1956/6810/23184/9141/4836	6
GO:0050679	BP	GO:0050679	positive regulation of epithelial cell proliferation	9/211	224/18903	0.000956216687601671	0.026723221479632	0.0215143700440143	2658/1893/9982/51738/8742/7857/1956/6356/56005	9
GO:0003158	BP	GO:0003158	endothelium development	7/211	139/18903	0.000962004432137831	0.026723221479632	0.0215143700440143	9693/5624/2658/634/947/4233/7132	7
GO:0006309	BP	GO:0006309	apoptotic DNA fragmentation	3/211	18/18903	0.000988595002672157	0.027015362574484	0.0217495674218641	581/1676/9131	3
GO:0008630	BP	GO:0008630	intrinsic apoptotic signaling pathway in response to DNA damage	6/211	102/18903	0.000996435621661405	0.027015362574484	0.0217495674218641	581/3190/7917/637/51246/7132	6
GO:0031341	BP	GO:0031341	regulation of cell killing	6/211	102/18903	0.000996435621661405	0.027015362574484	0.0217495674218641	3565/3575/634/911/5819/177	6
GO:0045862	BP	GO:0045862	positive regulation of proteolysis	12/211	372/18903	0.00100575706153607	0.0270516720757599	0.0217787995279992	8473/4287/2934/581/7917/9131/9141/637/3491/177/10010/5720	12
GO:0042129	BP	GO:0042129	regulation of T cell proliferation	8/211	182/18903	0.00102786107505363	0.0274285132547777	0.0220821873728887	7784/3565/3485/3958/7356/8764/637/177	8
GO:0046425	BP	GO:0046425	regulation of receptor signaling pathway via JAK-STAT	6/211	104/18903	0.00110240290951371	0.0289446524925628	0.0233028029571594	4485/3565/3575/11009/2066/9146	6
GO:0051963	BP	GO:0051963	regulation of synapse assembly	6/211	104/18903	0.00110240290951371	0.0289446524925628	0.0233028029571594	4916/3556/23077/4884/51738/1981	6
GO:0030193	BP	GO:0030193	regulation of blood coagulation	5/211	70/18903	0.00111029944645416	0.0289446524925628	0.0233028029571594	5624/7035/5627/634/947	5
GO:1903037	BP	GO:1903037	regulation of leukocyte cell-cell adhesion	12/211	377/18903	0.00112749143208895	0.0290203616206231	0.0233637549721716	10725/1803/7784/3565/3485/3575/3958/634/7356/3654/8764/177	12
GO:0034329	BP	GO:0034329	cell junction assembly	13/211	430/18903	0.00113032981231108	0.0290203616206231	0.0233637549721716	9693/4916/92737/3556/23077/4868/4884/2066/53942/51738/4653/28988/1981	13
GO:0002544	BP	GO:0002544	chronic inflammatory response	3/211	19/18903	0.00116434243217819	0.02944980212097	0.0237094895552342	3565/6356/191	3
GO:0050808	BP	GO:0050808	synapse organization	13/211	432/18903	0.00117854938248745	0.02944980212097	0.0237094895552342	4916/92737/3556/23077/4884/8404/63827/2066/53942/51738/28988/23184/1981	13
GO:0002697	BP	GO:0002697	regulation of immune effector process	12/211	379/18903	0.00117949740884726	0.02944980212097	0.0237094895552342	7784/3565/3575/3958/634/911/8764/6810/708/5819/1653/177	12
GO:0043405	BP	GO:0043405	regulation of MAP kinase activity	8/211	186/18903	0.00118181560591677	0.02944980212097	0.0237094895552342	4916/1956/7148/5770/3654/9146/80279/177	8
GO:2001234	BP	GO:2001234	negative regulation of apoptotic signaling pathway	9/211	233/18903	0.00125917740596207	0.0307372611252976	0.0247459989243128	3685/3565/3958/7857/581/5770/637/2395/11315	9
GO:0070265	BP	GO:0070265	necrotic cell death	5/211	72/18903	0.00126069026155691	0.0307372611252976	0.0247459989243128	8473/581/9131/427/142	5
GO:1900046	BP	GO:1900046	regulation of hemostasis	5/211	72/18903	0.00126069026155691	0.0307372611252976	0.0247459989243128	5624/7035/5627/634/947	5
GO:0032102	BP	GO:0032102	negative regulation of response to external stimulus	13/211	436/18903	0.00128015594640234	0.0309889178739825	0.0249486031058261	5624/1803/7035/3565/5627/634/51738/947/708/9111/4925/7132/142	13
GO:0007565	BP	GO:0007565	female pregnancy	8/211	189/18903	0.00130892964047442	0.0310207171438307	0.0249742041082789	3485/51738/7356/5669/10935/2488/708/142	8
GO:0043123	BP	GO:0043123	positive regulation of I-kappaB kinase/NF-kappaB signaling	8/211	189/18903	0.00130892964047442	0.0310207171438307	0.0249742041082789	1893/3654/92140/1653/51246/7132/23118/2597	8
GO:0051896	BP	GO:0051896	regulation of protein kinase B signaling	8/211	189/18903	0.00130892964047442	0.0310207171438307	0.0249742041082789	4916/1956/4653/4233/56005/708/92140/11315	8
GO:0071364	BP	GO:0071364	cellular response to epidermal growth factor stimulus	4/211	43/18903	0.00132422033415296	0.0311651577253082	0.0250904905418456	1277/2066/1956/8678	4
GO:0098698	BP	GO:0098698	postsynaptic specialization assembly	3/211	20/18903	0.00135860249944846	0.0317538197974541	0.0255644114596764	4916/3556/4884	3
GO:0002687	BP	GO:0002687	positive regulation of leukocyte migration	7/211	148/18903	0.00138533934460735	0.032021849558929	0.0257801972501573	7784/3565/3958/8764/708/10850/177	7
GO:0045936	BP	GO:0045936	negative regulation of phosphate metabolic process	13/211	440/18903	0.00138896780323475	0.032021849558929	0.0257801972501573	4916/3486/5787/3958/634/10935/581/5770/5525/142/11315/80279/1981	13
GO:0010563	BP	GO:0010563	negative regulation of phosphorus metabolic process	13/211	441/18903	0.0014173420100888	0.0324552167039929	0.0261290931020638	4916/3486/5787/3958/634/10935/581/5770/5525/142/11315/80279/1981	13
GO:0070482	BP	GO:0070482	response to oxygen levels	11/211	337/18903	0.00147645667819115	0.0335819575999316	0.0270362113025183	1803/1277/947/3654/5034/191/23576/8678/9550/9131/177	11
GO:0050670	BP	GO:0050670	regulation of lymphocyte proliferation	9/211	239/18903	0.00150108504271651	0.0339145147317751	0.027303946882254	7784/3565/3485/3958/7356/8764/637/683/177	9
GO:0050818	BP	GO:0050818	regulation of coagulation	5/211	75/18903	0.00151380537530486	0.0339754067344913	0.0273529699044281	5624/7035/5627/634/947	5
GO:0008631	BP	GO:0008631	intrinsic apoptotic signaling pathway in response to oxidative stress	4/211	45/18903	0.00157123129329156	0.0340949053259639	0.027449176004379	5034/8428/142/11315	4
GO:0032616	BP	GO:0032616	interleukin-13 production	3/211	21/18903	0.00157206944833678	0.0340949053259639	0.027449176004379	3556/3565/7356	3
GO:0032656	BP	GO:0032656	regulation of interleukin-13 production	3/211	21/18903	0.00157206944833678	0.0340949053259639	0.027449176004379	3556/3565/7356	3
GO:0045056	BP	GO:0045056	transcytosis	3/211	21/18903	0.00157206944833678	0.0340949053259639	0.027449176004379	338328/8615/177	3
GO:0097734	BP	GO:0097734	extracellular exosome biogenesis	3/211	21/18903	0.00157206944833678	0.0340949053259639	0.027449176004379	947/9525/9146	3
GO:0070371	BP	GO:0070371	ERK1 and ERK2 cascade	11/211	340/18903	0.00158365343459567	0.0340949053259639	0.027449176004379	9693/3685/8000/9965/2066/634/1956/6356/5770/3491/177	11
GO:0002703	BP	GO:0002703	regulation of leukocyte mediated immunity	9/211	241/18903	0.00158955297772272	0.0340949053259639	0.027449176004379	7784/3565/3575/634/911/6810/5819/1653/177	9
GO:0010822	BP	GO:0010822	positive regulation of mitochondrion organization	5/211	76/18903	0.00160593489943711	0.034229643862845	0.0275576515017609	581/9141/637/4836/11315	5
GO:0071900	BP	GO:0071900	regulation of protein serine/threonine kinase activity	12/211	395/18903	0.00167166083350581	0.035407866029695	0.0285062163187307	9693/4916/4485/4331/1956/7148/5770/3654/11140/9146/80279/177	12
GO:0032944	BP	GO:0032944	regulation of mononuclear cell proliferation	9/211	243/18903	0.0016821623002195	0.0354089940089682	0.0285071244339257	7784/3565/3485/3958/7356/8764/637/683/177	9
GO:0046596	BP	GO:0046596	regulation of viral entry into host cell	4/211	46/18903	0.00170600371785924	0.0356891765421294	0.028732694195524	5806/2934/5034/5819	4
GO:1903829	BP	GO:1903829	positive regulation of protein localization	13/211	451/18903	0.00172858425137643	0.0359397056927283	0.0289343905687291	2066/3958/51738/1956/6810/23184/9141/4836/51160/22948/142/11315/80279	13
GO:0002819	BP	GO:0002819	regulation of adaptive immune response	8/211	198/18903	0.00175671367001001	0.0363018452906337	0.0292259424432988	7784/3565/3575/634/911/8764/5819/177	8
GO:0009408	BP	GO:0009408	response to heat	6/211	114/18903	0.0017676449770942	0.0363063565295287	0.0292295743580744	4287/947/10294/3654/3281/11168	6
GO:0061045	BP	GO:0061045	negative regulation of wound healing	5/211	78/18903	0.00180246264283172	0.0367984692563656	0.0296257651884579	5624/7035/5627/634/947	5
GO:1904892	BP	GO:1904892	regulation of receptor signaling pathway via STAT	6/211	115/18903	0.00184792596798813	0.0368523091066614	0.029669110653497	4485/3565/3575/11009/2066/9146	6
GO:0045601	BP	GO:0045601	regulation of endothelial cell differentiation	4/211	47/18903	0.00184859620776997	0.0368523091066614	0.029669110653497	5624/2658/634/7132	4
GO:0070849	BP	GO:0070849	response to epidermal growth factor	4/211	47/18903	0.00184859620776997	0.0368523091066614	0.029669110653497	1277/2066/1956/8678	4
GO:0090199	BP	GO:0090199	regulation of release of cytochrome c from mitochondria	4/211	47/18903	0.00184859620776997	0.0368523091066614	0.029669110653497	581/9141/637/2395	4
GO:0009925	CC	GO:0009925	basal plasma membrane	9/212	254/19869	0.00167883810225426	0.0370331934320793	0.0325372338083953	338328/2066/634/3953/947/1956/2065/4233/6810	9
GO:0008154	BP	GO:0008154	actin polymerization or depolymerization	8/211	200/18903	0.00187097187079322	0.0370802553808082	0.0298526259716591	4868/2934/51738/6356/55845/28988/51019/136319	8
GO:0070661	BP	GO:0070661	leukocyte proliferation	11/211	348/18903	0.00190102986753563	0.0374569198899899	0.0301558715829398	7784/3565/3485/3575/3958/7356/581/8764/637/683/177	11
GO:0005996	BP	GO:0005996	monosaccharide metabolic process	9/211	248/18903	0.00193272144878468	0.0378612311556722	0.0304813750851835	8473/3486/4485/51738/3953/11164/55276/4351/2597	9
GO:0045765	BP	GO:0045765	regulation of angiogenesis	11/211	349/18903	0.00194411073351957	0.0378654671028611	0.0304847853677116	2658/1893/634/51738/8742/947/6356/23576/56005/92140/9146	11
GO:0097530	BP	GO:0097530	granulocyte migration	7/211	158/18903	0.00201317400860176	0.0383975110259607	0.0309131240637015	1803/3565/3958/7857/6356/708/683	7
GO:0070227	BP	GO:0070227	lymphocyte apoptotic process	5/211	80/18903	0.00201605713908676	0.0383975110259607	0.0309131240637015	3575/6482/3958/581/1676	5
GO:1903201	BP	GO:1903201	regulation of oxidative stress-induced cell death	5/211	80/18903	0.00201605713908676	0.0383975110259607	0.0309131240637015	4314/4233/5034/142/11315	5
GO:0071887	BP	GO:0071887	leukocyte apoptotic process	6/211	117/18903	0.00201674740708793	0.0383975110259607	0.0309131240637015	9693/3575/6482/3958/581/1676	6
GO:0016485	BP	GO:0016485	protein processing	9/211	250/18903	0.00204093495152421	0.0386409416241091	0.0311091055239679	8473/1803/1363/7850/5653/2934/1510/2395/142	9
GO:0140112	BP	GO:0140112	extracellular vesicle biogenesis	3/211	23/18903	0.00205925191208426	0.0387711373891865	0.0312139237200141	947/9525/9146	3
GO:0045861	BP	GO:0045861	negative regulation of proteolysis	11/211	352/18903	0.00207815303507893	0.0389042808842253	0.031321115078788	8473/7850/7035/5627/1893/10935/5269/7917/819/11315/2597	11
GO:0032970	BP	GO:0032970	regulation of actin filament-based process	12/211	406/18903	0.00209968998875726	0.0389042808842253	0.031321115078788	4916/4868/2934/6356/4653/4233/55845/28988/51019/683/10850/136319	12
GO:0071346	BP	GO:0071346	cellular response to interferon-gamma	6/211	118/18903	0.00210540701167544	0.0389042808842253	0.031321115078788	2934/6356/11140/6810/9111/2597	6
GO:1901888	BP	GO:1901888	regulation of cell junction assembly	8/211	204/18903	0.00211705864948364	0.0389042808842253	0.031321115078788	9693/4916/3556/23077/4884/51738/4653/1981	8
GO:0001570	BP	GO:0001570	vasculogenesis	5/211	81/18903	0.00212952156747581	0.0389042808842253	0.031321115078788	9693/3685/2658/634/947	5
GO:0019884	BP	GO:0019884	antigen processing and presentation of exogenous antigen	4/211	49/18903	0.00215816016708007	0.0389042808842253	0.031321115078788	8722/1510/911/5720	4
GO:0099054	BP	GO:0099054	presynapse assembly	4/211	49/18903	0.00215816016708007	0.0389042808842253	0.031321115078788	4916/3556/53942/1981	4
GO:2000378	BP	GO:2000378	negative regulation of reactive oxygen species metabolic process	4/211	49/18903	0.00215816016708007	0.0389042808842253	0.031321115078788	5446/4314/8678/11315	4
GO:0043281	BP	GO:0043281	regulation of cysteine-type endopeptidase activity involved in apoptotic process	8/211	205/18903	0.00218238936568497	0.039132897144478	0.0315051697903394	2934/10935/581/9131/9141/637/11315/3491	8
GO:1901342	BP	GO:1901342	regulation of vasculature development	11/211	355/18903	0.0022196241861952	0.0394966948230343	0.0317980565548928	2658/1893/634/51738/8742/947/6356/23576/56005/92140/9146	11
GO:0042509	BP	GO:0042509	regulation of tyrosine phosphorylation of STAT protein	5/211	82/18903	0.00224757391414263	0.0394966948230343	0.0317980565548928	3565/11009/2066/3562/7132	5
GO:1905897	BP	GO:1905897	regulation of response to endoplasmic reticulum stress	5/211	82/18903	0.00224757391414263	0.0394966948230343	0.0317980565548928	4287/581/5770/7917/11315	5
GO:0071674	BP	GO:0071674	mononuclear cell migration	8/211	206/18903	0.00224929539712176	0.0394966948230343	0.0317980565548928	3565/3958/1893/6356/8764/708/10850/177	8
GO:0018198	BP	GO:0018198	peptidyl-cysteine modification	4/211	50/18903	0.00232558735281635	0.0399526980379118	0.0321651762868312	5870/10935/11315/2597	4
GO:2000059	BP	GO:2000059	negative regulation of ubiquitin-dependent protein catabolic process	4/211	50/18903	0.00232558735281635	0.0399526980379118	0.0321651762868312	8473/7917/819/11315	4
GO:0043122	BP	GO:0043122	regulation of I-kappaB kinase/NF-kappaB signaling	9/211	255/18903	0.00233273066918818	0.0399526980379118	0.0321651762868312	1893/3654/92140/1653/51246/7132/23118/2597/10010	9
GO:0051402	BP	GO:0051402	neuron apoptotic process	9/211	255/18903	0.00233273066918818	0.0399526980379118	0.0321651762868312	10752/2065/581/4149/9131/637/142/11315/2597	9
GO:0042745	BP	GO:0042745	circadian sleep/wake cycle	3/211	24/18903	0.00233420897359296	0.0399526980379118	0.0321651762868312	51738/191/142	3
GO:0045446	BP	GO:0045446	endothelial cell differentiation	6/211	121/18903	0.00238910390508808	0.0406867996700678	0.0327561878973197	9693/5624/2658/634/4233/7132	6
GO:0005520	MF	GO:0005520	insulin-like growth factor binding	3/211	19/18432	0.0012516730618065	0.0410369953835131	0.0351033121844981	3685/3486/3485	3
GO:0030100	BP	GO:0030100	regulation of endocytosis	8/211	209/18903	0.00245972819604181	0.0413442857970525	0.0332855177853924	3685/9779/3565/3958/5770/3190/51160/6457	8
GO:0044703	BP	GO:0044703	multi-organism reproductive process	8/211	209/18903	0.00245972819604181	0.0413442857970525	0.0332855177853924	3485/51738/7356/5669/10935/2488/708/142	8
GO:0007159	BP	GO:0007159	leukocyte cell-cell adhesion	12/211	414/18903	0.00246430974653426	0.0413442857970525	0.0332855177853924	10725/1803/7784/3565/3485/3575/3958/634/7356/3654/8764/177	12
GO:0043500	BP	GO:0043500	muscle adaptation	6/211	122/18903	0.00248977823811572	0.0413581284263851	0.0332966622295632	2934/4653/8678/7132/142/136319	6
GO:0097194	BP	GO:0097194	execution phase of apoptosis	5/211	84/18903	0.00249787328034382	0.0413581284263851	0.0332966622295632	581/1676/8428/9131/80279	5
GO:1901799	BP	GO:1901799	negative regulation of proteasomal protein catabolic process	4/211	51/18903	0.00250174574429299	0.0413581284263851	0.0332966622295632	8473/7917/819/11315	4
GO:0016324	CC	GO:0016324	apical plasma membrane	11/212	368/19869	0.00207488727692208	0.042034310772918	0.036931197956276	9693/1803/10149/338328/3485/634/947/2065/9550/92140/177	11
GO:0005759	CC	GO:0005759	mitochondrial matrix	13/212	483/19869	0.00212973841249451	0.042034310772918	0.036931197956276	4287/686/2066/10935/5770/3396/8192/7263/55379/708/2395/87178/11315	13
GO:0031960	BP	GO:0031960	response to corticosteroid	7/211	165/18903	0.00256982633281206	0.0422773856402916	0.0340367391652982	4916/3485/1277/7356/9101/9131/142	7
GO:0072655	BP	GO:0072655	establishment of protein localization to mitochondrion	6/211	123/18903	0.00259360904277929	0.0424625171303333	0.0341857850947567	581/26519/9131/9141/637/4836	6
GO:0050927	BP	GO:0050927	positive regulation of positive chemotaxis	3/211	25/18903	0.00263085738787313	0.0428652677283752	0.0345100321324249	4916/7857/177	3
GO:0010939	BP	GO:0010939	regulation of necrotic cell death	4/211	52/18903	0.00268685887736373	0.0433607844542175	0.0349089634592822	8473/9131/427/142	4
GO:0099172	BP	GO:0099172	presynapse organization	4/211	52/18903	0.00268685887736373	0.0433607844542175	0.0349089634592822	4916/3556/53942/1981	4
GO:0089717	CC	GO:0089717	spanning component of membrane	3/212	25/19869	0.00231639264014399	0.0434323620026999	0.0381595208613195	2066/1956/2065	3
GO:0034976	BP	GO:0034976	response to endoplasmic reticulum stress	9/211	261/18903	0.00272570009681997	0.0437791356783074	0.0352457702716755	4287/581/5770/5034/7917/9131/11315/80279/1981	9
GO:0007260	BP	GO:0007260	tyrosine phosphorylation of STAT protein	5/211	86/18903	0.00276781889928388	0.044038207744944	0.0354543443881583	3565/11009/2066/3562/7132	5
GO:0045921	BP	GO:0045921	positive regulation of exocytosis	5/211	86/18903	0.00276781889928388	0.044038207744944	0.0354543443881583	7784/3565/6810/9525/9146	5
GO:0043280	BP	GO:0043280	positive regulation of cysteine-type endopeptidase activity involved in apoptotic process	6/211	125/18903	0.00281098717611958	0.0442331768909561	0.0356113104320039	2934/581/9131/9141/637/3491	6
GO:0034381	BP	GO:0034381	plasma lipoprotein particle clearance	4/211	53/18903	0.00288114831705618	0.0442331768909561	0.0356113104320039	55937/338328/3190/10330	4
GO:0071622	BP	GO:0071622	regulation of granulocyte chemotaxis	4/211	53/18903	0.00288114831705618	0.0442331768909561	0.0356113104320039	1803/3565/708/683	4
GO:0001910	BP	GO:0001910	regulation of leukocyte mediated cytotoxicity	5/211	87/18903	0.00291042951513267	0.0442331768909561	0.0356113104320039	3575/634/911/5819/177	5
GO:0010507	BP	GO:0010507	negative regulation of autophagy	5/211	87/18903	0.00291042951513267	0.0442331768909561	0.0356113104320039	3953/4233/8678/23118/1981	5
GO:0099175	BP	GO:0099175	regulation of postsynapse organization	5/211	87/18903	0.00291042951513267	0.0442331768909561	0.0356113104320039	4916/3556/4884/51738/28988	5
GO:0038127	BP	GO:0038127	ERBB signaling pathway	6/211	126/18903	0.00292465871836428	0.0442331768909561	0.0356113104320039	2066/634/1956/4653/2065/819	6
GO:0070997	BP	GO:0070997	neuron death	11/211	368/18903	0.00292596854459721	0.0442331768909561	0.0356113104320039	10752/947/2065/581/4149/9131/637/142/11315/2597/1981	11
GO:0070372	BP	GO:0070372	regulation of ERK1 and ERK2 cascade	10/211	315/18903	0.00293240661844023	0.0442331768909561	0.0356113104320039	9693/8000/9965/2066/634/1956/6356/5770/3491/177	10
GO:0000737	BP	GO:0000737	DNA catabolic process, endonucleolytic	3/211	26/18903	0.00294974859172501	0.0442331768909561	0.0356113104320039	581/1676/9131	3
GO:0006517	BP	GO:0006517	protein deglycosylation	3/211	26/18903	0.00294974859172501	0.0442331768909561	0.0356113104320039	10905/10724/11315	3
GO:0050926	BP	GO:0050926	regulation of positive chemotaxis	3/211	26/18903	0.00294974859172501	0.0442331768909561	0.0356113104320039	4916/7857/177	3
GO:0060561	BP	GO:0060561	apoptotic process involved in morphogenesis	3/211	26/18903	0.00294974859172501	0.0442331768909561	0.0356113104320039	581/7132/3491	3
GO:0031589	BP	GO:0031589	cell-substrate adhesion	11/211	369/18903	0.00298704761498009	0.0445951734236455	0.0359027471274213	3685/4287/1277/947/22801/7148/4653/5034/708/683/3491	11
GO:0045177	CC	GO:0045177	apical part of cell	12/212	435/19869	0.00256240215465008	0.0454399583239559	0.0399233879449774	9693/1803/10752/10149/338328/3485/634/947/2065/9550/92140/177	12
GO:0045178	CC	GO:0045178	basal part of cell	9/212	272/19869	0.00266581088833875	0.0454399583239559	0.0399233879449774	338328/2066/634/3953/947/1956/2065/4233/6810	9
GO:0070585	BP	GO:0070585	protein localization to mitochondrion	6/211	128/18903	0.00316227910062429	0.046926695157648	0.037779812038522	581/26519/9131/9141/637/4836	6
GO:0043491	BP	GO:0043491	protein kinase B signaling	8/211	218/18903	0.0031847565317967	0.046926695157648	0.037779812038522	4916/1956/4653/4233/56005/708/92140/11315	8
GO:0044706	BP	GO:0044706	multi-multicellular organism process	8/211	218/18903	0.0031847565317967	0.046926695157648	0.037779812038522	3485/51738/7356/5669/10935/2488/708/142	8
GO:0051346	BP	GO:0051346	negative regulation of hydrolase activity	11/211	373/18903	0.00324172705022745	0.0475593635204365	0.0382891616048738	7035/5806/5627/3958/1893/3953/10935/5269/1676/11315/2597	11
GO:0090200	BP	GO:0090200	positive regulation of release of cytochrome c from mitochondria	3/211	27/18903	0.00329140748217919	0.0478737337214819	0.0385422552238919	581/9141/637	3
GO:1904861	BP	GO:1904861	excitatory synapse assembly	3/211	27/18903	0.00329140748217919	0.0478737337214819	0.0385422552238919	4916/3556/4884	3
GO:0070663	BP	GO:0070663	regulation of leukocyte proliferation	9/211	269/18903	0.003329311767848	0.0482181093215252	0.0388195056332075	7784/3565/3485/3958/7356/8764/637/683/177	9
GO:0006493	BP	GO:0006493	protein O-linked glycosylation	5/211	90/18903	0.00337011183107503	0.0486013148745246	0.0391280173175655	8473/11041/10724/6482/51809	5
GO:0050863	BP	GO:0050863	regulation of T cell activation	11/211	376/18903	0.00344396853747385	0.0494559719216054	0.039816085856968	1803/7784/3565/3485/3575/3958/634/7356/8764/637/177	11

## Sheet: KEGG (57.5-year peak)
	ID	Description	GeneRatio	BgRatio	pvalue	p.adjust	qvalue	geneID	Count	kegg_class
hsa04215	hsa04215	Apoptosis - multiple species	7/170	46/11016	5.9390432860362e-06	0.00139567517221851	0.00120656353074209	Q07812/A0A024R1X5/Q14457/A8ASI8/B3KT21/P55957/P19438	7	Cellular Processes; Cell growth and death
hsa04060	hsa04060	Cytokine-cytokine receptor interaction	19/170	408/11016	1.68757068290953e-05	0.0019828955524187	0.00171421653579758	P27930/A8K6K4/Q9NPH3/D4HNR6/P05112/B2RC63/Q9UK05/P16871/Q13007/P08700/O43508/Q4ACW9/P48357/P51671/Q6I9T4/Q92956/P19438/Q5VZ77/Q9Y4X3	19	Environmental Information Processing; Signaling molecules and interaction
hsa04115	hsa04115	p53 signaling pathway	7/170	92/11016	0.000536467892888188	0.0365671824540716	0.0316123906545837	B3KPF0/P17936/Q07812/A8ASI8/B3KT21/P55957/Q8N114	7	Cellular Processes; Cell growth and death
hsa05417	hsa05417	Lipid and atherosclerosis	14/170	332/11016	0.000622420126877814	0.0365671824540716	0.0316123906545837	P08254/Q07812/P51617/A8ASI8/B3KT21/P55957/P19438/Q9NYJ8/A0A1U9X785/B4DNX3/Q15109/B2R7S3/Q6NW12/Q92844	14	Human Diseases; Cardiovascular disease
hsa04210	hsa04210	Apoptosis	10/170	196/11016	0.000912351061246365	0.0428804998785791	0.037070264172747	Q9UBX1/P08700/Q07812/O00273/O95831/A8ASI8/B3KT21/P55957/P19438/P09874	10	Cellular Processes; Cell growth and death

## Sheet: Reactome (57.5-year peak)
	ID	Description	GeneRatio	BgRatio	pvalue	p.adjust	qvalue	geneID	Count	disease
R-HSA-6807004	R-HSA-6807004	Negative regulation of MET activity	5/170	21/10899	1.4468048161562e-05	0.0116033746255727	0.0108434213589812	4233/5770/9101/9146/6457	5	FALSE
R-HSA-8863795	R-HSA-8863795	Downregulation of ERBB2 signaling	5/170	29/10899	7.63211335403289e-05	0.0306047745496719	0.0286003405687969	2066/1956/2065/9101/11140	5	FALSE
R-HSA-381426	R-HSA-381426	Regulation of Insulin-like Growth Factor (IGF) transport and uptake by Insulin-like Growth Factor Binding Proteins (IGFBPs)	9/170	125/10899	0.000143757123879714	0.0365696695260901	0.0341745697631923	5624/3486/1114/3485/8404/7857/5034/51246/3491	9	FALSE
R-HSA-6798695	R-HSA-6798695	Neutrophil degranulation	19/170	482/10899	0.000182392366713667	0.0365696695260901	0.0341745697631923	3685/5870/1118/5806/7276/5787/2934/3958/634/5269/6993/28988/10450/55276/427/29099/56954/8635/683	19	FALSE
R-HSA-6811558	R-HSA-6811558	PI5P, PP2A and IER3 Regulate PI3K/AKT Signaling	8/170	106/10899	0.000244718259189548	0.0371898010832262	0.0347540863253144	3556/9965/2066/1956/2065/4233/3654/5525	8	FALSE
R-HSA-8957275	R-HSA-8957275	Post-translational protein phosphorylation	8/170	108/10899	0.0002782279382785	0.0371898010832262	0.0347540863253144	5624/3486/1114/8404/7857/5034/51246/3491	8	FALSE
R-HSA-9665686	R-HSA-9665686	Signaling by ERBB2 TMD/JMD mutants	4/170	22/10899	0.000335554343942528	0.0379630374038358	0.0354766801831357	2066/1956/2065/11140	4	TRUE
R-HSA-199418	R-HSA-199418	Negative regulation of the PI3K/AKT network	8/170	113/10899	0.000378683664876168	0.0379630374038358	0.0354766801831357	3556/9965/2066/1956/2065/4233/3654/5525	8	FALSE
R-HSA-5357801	R-HSA-5357801	Programmed Cell Death	11/170	210/10899	0.000444778861285032	0.039634738527844	0.0370388946473618	8473/2934/581/1676/11140/28988/8428/708/637/4836/5720	11	FALSE
R-HSA-9664565	R-HSA-9664565	Signaling by ERBB2 KD Mutants	4/170	25/10899	0.000559498060731569	0.0416541528976958	0.0389260491707041	2066/1956/2065/11140	4	TRUE
R-HSA-163125	R-HSA-163125	Post-translational modification: synthesis of GPI-anchored proteins	7/170	92/10899	0.000571316311564406	0.0416541528976958	0.0389260491707041	8000/5067/338328/7512/53942/419/683	7	FALSE
R-HSA-1227990	R-HSA-1227990	Signaling by ERBB2 in Cancer	4/170	26/10899	0.000653242019902808	0.0436583416635043	0.0407989752781403	2066/1956/2065/11140	4	TRUE
