# Supplementary material
Source: Research Square preprint supplement (doi:10.21203/rs.3.rs-9402213/v1)
Supplement: Supplementary file 7 [file fe89f0db6a0ed2247df7a17a.xlsx]

## Sheet: Organ-specific proteins
Brain	Eye	Heart	Pulmonary	Renal	Hepatic	Immune	Endocrine	Skin	Reproductive(female)	Reproductive(male)
PMCH	CRX	NPPB	SFTPA1	UMOD	AHSG	SH2D1A	CCN3	CDSN	BTN1A1	LYZL2
MOG	IMPG1	BMP10	SFTPA2	NPHS2	CFHR2	GRAP2	AKR1B1	FABP9	STC2	DNAJB8
OXT	PCARE	MYL4	SCGB3A2	SOST	MBL2	SERPINA9	DBH	CST6	MMP10	ZNRF4
NCAN	CLUL1	PXDNL	SFTPD	REN	F9	CD8A	SCARB1	CCL27	PSG1	DKKL1
MEPE	CABP2	CRIP2	AGER	PTH1R	CFHR5	TCL1A	CELA2A	SERPINA12	SIGLEC6	PDCL2
NRGN	RTBDN	FGF12	SCGB1A1	SLC13A1	A1BG	CD1C	CPA1	DSG4	PRG2	TMCO5A
MAG	STX3		LAMP3	GGACT	SERPINC1	CR2	CTRB1	CD207	TFPI2	GAGE2A
MDGA1	WIF1		CCL18	PDZK1	APOA2	CTSV	CELA3A	EPPK1	INSL4	TEX101
CNTN2			MSR1		F2	CXCL9	PNLIP	S100A3	ADAM12	BRDT
CNP					ITIH1	CD3G	AMY2A	WFDC12	HGF	IL13
VSNL1					SERPINA7	CXCL13	CLPS		FCGR2B	ACRV1
GRIN2B					HAO1	SIT1	CTRC		FLT1	CRISP2
BCAN					APOH	SLAMF1	PNLIPRP1		PAPPA	ACRBP
CRTAM					CFHR4	TIGIT	PLA2G1B			IZUMO1
GRIK2					FGA	CD72	CPB1			LRRC37A2
CBLN1					APOF	FCRL3	CTRL			IL5
CNDP1					AGXT	FCRL5	GP2			SPESP1
NPTXR					F12	CCL17	PRSS2			PHOSPHO1
LRTM2					C9	CCL21	CPA2			KLK3
SEPTIN8					F13B	CD5L	SERPINI2			KLK4
C1QL2					ORM1	LILRB1	AMY2B			MSMB
CA11					HRG	STAB2	PNLIPRP2			EDDM3B
SEPTIN3					INHBC	VCAM1	SPINK1			SPINK2
ABCA2					GDF2	CCL19	PPY			NPC2
APLP1					C8B	CD27	REG3G			ADGRG2
CRH					SAA4	CD79B	REG1A			ENPP5
GFAP					FGF21	FCER2	REG1B
IDS					ITIH3	HMOX1	GCG
IGSF21					PON1	LY75	GPHA2
RTN4R					F7	NCR1	RNASE1
FGFR2					SERPINA11	SLAMF6	KIRREL2
IGLON5					CPB2	MPO	SEL1L
LHPP					APCS	RNASE3	COCH
NPTX1					AMBP	RAB44	IL22RA1
TUBB3					LPA	AHSP	TG
ADAM22					HGFAC	PRTN3	IGFBPL1
DNM1					LECT2	AZU1	PTH
ERC2					ANG	MMP8	CD109
GP1BB					ASGR2	CEACAM8	ALCAM
KLK6					CCL16	TARM1	CHGA
PTPRZ1					PGLYRP2	SLC4A1	ATP6AP2
SEZ6L					SERPINA1	PGLYRP1	TSHB
SLITRK1					CA5A	PRG3	PRL
SNAP25					ASGR1	CLC	GH1
CEND1					PROC	EREG	POMC
CLIP2					ITIH4	CLEC4D	GHRHR
EDIL3					PZP	VSTM1	FSHB
HPCAL1					ADH4	CCL7	LHB
ICAM5					C5	ITGAM	GAL
OMG					KLKB1	OSM	CGA
PCDH9					FETUB	CST7	NPTX2
SEZ6					LBP	CXCL8
TAFA5					LRG1	RELT
					CFB	S100A12
					PON3	CLEC5A
					SERPINA6	HMBS
					AKR1C4	PLAUR
					GC	RETN
					SERPINF2	FOLR3
					ANGPTL3
					BCHE
					C4BPB
					HSD11B1
					AFM
					PLG
					AFP
					MST1
					APOC1
					C3
					CES1
					CLEC1B
					UPB1
					DCXR
					AGT
					C2
					CFH
					EPO
					FGL1
					FTCD
					IGFBP1
					IL1RAP
					APOA1
					C1S
					CFI
					GCHFR
					PCSK9
					SERPINA4
					SERPIND1
					SHBG
					SULT2A1
					THPO
					ACADSB
					APOM
					ARG1
					F11
					FCN2
					FUOM
					LEPR
					RNASE4

## Sheet: Organ-specific metabolites
CNS(Central Nervous System)	Digestive	Endocrine	Heart	Hepatic	Immune
Creatinine	Cholesteryl Esters in IDL	3-Hydroxybutyrate	Triglycerides in Large HDL	Acetate	Apolipoprotein B
	Cholesteryl Esters in Medium VLDL	Acetoacetate		Alanine	Cholesteryl Esters in Large LDL
	Cholesteryl Esters in Very Small VLDL	Acetone		Apolipoprotein A1	Cholesteryl Esters in Medium LDL
	Degree of Unsaturation	Albumin		Average Diameter for LDL Particles	Cholesteryl Esters in Small LDL
	Free Cholesterol in IDL	Average Diameter for HDL Particles		Cholesteryl Esters in Medium HDL	Clinical LDL Cholesterol
	Free Cholesterol in Large LDL	Average Diameter for VLDL Particles		Cholesteryl Esters in Small HDL	Concentration of IDL Particles
	Glucose	Cholesteryl Esters in Chylomicrons and Extremely Large VLDL		Concentration of Medium HDL Particles	Concentration of Large LDL Particles
	Glutamine	Cholesteryl Esters in Large HDL		Concentration of Small HDL Particles	Concentration of Medium LDL Particles
	Isoleucine	Cholesteryl Esters in Large VLDL		Docosahexaenoic Acid	Concentration of Small LDL Particles
	Leucine	Cholesteryl Esters in Small VLDL		Free Cholesterol in Medium HDL	Free Cholesterol in Medium LDL
	Phenylalanine	Cholesteryl Esters in Very Large HDL		Free Cholesterol in Small HDL	Free Cholesterol in Medium VLDL
	Phospholipids in IDL	Cholesteryl Esters in Very Large VLDL		Histidine	Free Cholesterol in Small LDL
	Tyrosine	Citrate		Lactate	Free Cholesterol in Small VLDL
	Valine	Concentration of Chylomicrons and Extremely Large VLDL Particles		Linoleic Acid	Free Cholesterol in Very Small VLDL
		Concentration of Large HDL Particles		Omega-6 Fatty Acids	Phospholipids in Large LDL
		Concentration of Large VLDL Particles		Phosphatidylcholines	Phospholipids in Medium LDL
		Concentration of Medium VLDL Particles		Phosphoglycerides	Phospholipids in Small LDL
		Concentration of Small VLDL Particles		Phospholipids in Medium HDL
		Concentration of Very Large HDL Particles		Phospholipids in Small HDL
		Concentration of Very Large VLDL Particles		Pyruvate
		Concentration of Very Small VLDL Particles		Sphingomyelins
		Free Cholesterol in Chylomicrons and Extremely Large VLDL		Total Cholines
		Free Cholesterol in Large HDL
		Free Cholesterol in Large VLDL
		Free Cholesterol in Very Large HDL
		Free Cholesterol in Very Large VLDL
		Glycine
		Glycoprotein Acetyls
		Monounsaturated Fatty Acids
		Omega-3 Fatty Acids
		Phospholipids in Chylomicrons and Extremely Large VLDL
		Phospholipids in Large HDL
		Phospholipids in Large VLDL
		Phospholipids in Medium VLDL
		Phospholipids in Small VLDL
		Phospholipids in Very Large HDL
		Phospholipids in Very Large VLDL
		Phospholipids in Very Small VLDL
		Saturated Fatty Acids
		Triglycerides in Chylomicrons and Extremely Large VLDL
		Triglycerides in IDL
		Triglycerides in Large LDL
		Triglycerides in Large VLDL
		Triglycerides in Medium HDL
		Triglycerides in Medium LDL
		Triglycerides in Medium VLDL
		Triglycerides in Small HDL
		Triglycerides in Small LDL
		Triglycerides in Small VLDL
		Triglycerides in Very Large HDL
		Triglycerides in Very Large VLDL
		Triglycerides in Very Small VLDL
